# Supplementary material for: Closely related type II-C Cas9 orthologs recognize diverse PAMs
Source: eLife. 2022 Aug 12;11:e77825. doi: 10.7554/eLife.77825 (PMC9433092; doi:10.7554/eLife.77825)
Supplement: Figure 2—source data 1. [file elife-77825-fig2-data1.xlsx]

## Sheet: Cas9_Unique_PAM_Number
Sample ID	Unique_PAM_Number
AmiCas9	952
ApsCas9	835
AsuCas9	1627
BdeCas9	1875
CflCas9	764
GanCas9	1851
HfeCas9	1477
Hpa2Cas9	920
HpiCas9	688
HspCas9	1236
MgrCas9	893
Nan1Cas9	1500
Nan2Cas9	749
NarCas9	1789
NbaCas9	741
NdeCas9	799
Nme2-SmuCas9	1851
Nsp2Cas9	2193
Nsp2-SmuCas9	1428
OorCas9	1212
PaeCas9	694
PmaCas9	2135
PstCas9	518
PutCas9	779
RpnCas9	940
SinCas9	1703
SmuCas9	589

## Sheet: AmiCas9 PAM_counts
7mer	counts number
CTGGGTTTATT	158137
CTGCATTTTGG	99903
CTGTGTTTTTT	49805
CTGCCTTTTTC	38049
CTGCATTTGCT	34722
CTGTATTGAAA	32407
CTGTATTTATC	28899
CTGCGTTTTTG	28854
CTGTGTTTATT	21293
CTGCATTTCTT	18500
CTGCATCTAAT	17912
CTGCATTGACC	17701
CTGTATTGACG	15748
CTGCGTTTAGT	14070
CTGGGTTTACA	13029
CTGTATTTACT	12124
CTGCGTTTATA	10543
CTGAGTTTTTA	9026
CTGCATTTGGG	8150
CTGCATTTGCC	6819
CTGAGTTTTAC	6413
CTGCAGTTTCA	5276
CTGCATCTTCG	5082
CTGAGTTTCTA	5028
CTGCATTTGGT	4640
CTGTGTTTTCC	3732
CTGGGTTTTTC	3111
CTGCATTGGAA	2680
CTGCATTTGAC	1163
CTGCATTTTTC	916
CTGAATTTAGT	844
CTGTGTTTAGT	664
CCGGGTTTATT	145
CTGAGGGTGCA	144
CTGGATTTACA	142
CTGGGTTTATC	135
CTGTATTAAAA	103
CTGCGGGTGCA	76
CTGTGTTTTTC	71
CTGTGGGTGCA	58
CTGCCCTTTTC	52
ATGGGTTTATT	49
CTGCATTTTTG	48
CTGTATTTTGG	47
CTGGGTTTATA	46
CTGGGGGTGCA	46
CTGGGTTCATT	45
CTGCATTTTGT	43
CTGGGTTTACT	43
ATGCATTTTGG	40
CTGGTTTTATT	40
CTGGGTTTAGT	39
CTGCGTTTTTT	38
CTACATTTGCT	37
CTGGGTCTATT	36
CTGCGTTTTGG	35
CCGCATTTTGG	34
CTGGGTTTTTT	33
CTGGGTTTGTT	31
CTTCGTTTTTG	29
CTGGGAATTTT	28
CTGCATTTTGA	28
CTGTGTTTTCT	28
CTGAGATAATT	27
CTTGGTTTATT	27
CGGGGTTTATT	26
CTGTATTTATT	26
CTGTATTTGCT	25
CTGTATTGACC	25
CAGGGTTTATT	23
CTACATTTTGG	23
CTGGATTTATT	23
ATGTGTTTTTT	22
CTATGTTTTTT	22
CTGCGTGGAAT	22
CTGCATTTAGG	22
CTGCATTATGG	22
CTGTGTTTTTG	22
CTGCATTCTGG	21
CTGCATTTCGG	21
CTGTGTTTATC	21
CTGGCAGCCGT	20
CTGCATTTAGT	20
ATGCCTTTTTC	19
CTGAATTTTGG	19
CCGTGTTTTTT	19
CTATATTGAAA	19
CTGCATTTTAG	19
CTGCCTTTTCC	19
CTGTCATGTAC	19
CTTCATTTTGG	19
CTGAGTTTTTT	17
CTGAGTGTGCA	17
ATGCGTTTTTG	17
CTACCTTTTTC	17
CTGCTTTTTTG	17
CTGCGTTTATT	17
CTGTTTTTTTT	16
CTGTGTTTATA	16
CTGACTTTTTC	15
CTGCATTTGAT	15
CTGGGTTTAAT	15
CTGTTCCCCTT	15
ATGTATTTATC	14
CTATATTTATC	14
CCGCCTTTTTC	14
CTGGGCTTATT	14
CTGCATTCGCT	14
CTGCATTTTCT	14
CTGTGTTTCTT	14
CTGTAACGTGC	14
CTGAGGCTCGA	13
ATGCATTTGCT	13
CTGACTTAAAA	13
CTAGGTTTATT	13
CTACATTGACC	13
CTGGGATATGC	13
TTGCATTGCGG	13
CTGGGTTTATG	13
CTGTATTGAGA	13
CTGTATTGACA	13
CTGTATTTATA	13
ATGTATTGAAA	12
CCGCATTTGCT	12
CTGCATTTACT	12
CTGCCTTTTTT	12
CTGCATTTGTT	12
CTGTATTGACT	12
CTGGGTTTAAA	12
CTGTATCGAAA	12
CCGCATTTCTT	11
CTGAGTTTTGG	11
CAGCATTTTGG	11
CCGTGTTTATT	11
CTGAAAGGTAG	11
CTGCATTGTGG	11
CTGCATTGACA	11
CTGTATTTTTT	11
CTGGGTTAATT	11
CTGTGTTTACT	11
CAGTGTTTTTT	10
CTGACCTTATC	10
CTGAGTTTATA	10
CTGAGAAAAAA	10
CTGCTTTTTTC	10
CTGCATTTGCA	10
CTGCCGATCCT	10
CTGCGTTTGCT	10
CTGCCTTTCTC	10
CTGCCTTTTTA	10
CTGTATTTGGG	10
CTGTGTTAAGT	10
CTGTATTGATG	10
CTGCACTTTGG	9
CCGTATTTATC	9
CTACATTTCTT	9
CTGAGTTTTTG	9
ATGTATTGACG	9
ATGTGTTTATT	9
CTGCATTTCTC	9
TTGGGTTTATT	9
CTGGGTTTGCA	9
CTGTATTGGCG	9
CTGTATTTACC	9
CTGGGTTGATT	9
CTGGGTTTGCT	9
CTGGTGCATCC	9
CAGCGTTTTTG	8
CTGCAATTGCT	8
CTGAGAAAAAG	8
CTGCAAGCAAT	8
CTGAGTTTATT	8
CCGTATTGAAA	8
CTGCCTTTATC	8
CTGCATTGCGG	8
CTGCGTTTTTA	8
CTGCGTTGACC	8
CTGTATCTATC	8
CTGGGTTTAGA	8
CTGTGTTTGTT	8
CTGGGGTTATT	8
CTGTATTTAAA	8
CTGTGAAAGGA	8
TTGTATTGAAA	8
CTGTATTGAAG	8
CTGTATCTAAT	8
CCGCGTTTAGT	7
CTCGGTTTATT	7
ATGCATTGACC	7
CAGCCTTTTTC	7
CTGCAATTTGG	7
CTACGTTTTTG	7
CTGCATTGACT	7
CTGCATTTACC	7
CTGCATTTATC	7
CTGGCCGAACC	7
CTGGGAGACTA	7
CTGGGATTATT	7
CTGCGTTTTCG	7
CTGCATATTGG	7
CTGCGTTCTTG	7
CTGCATTTTTT	7
CTGTATTCATC	7
CTGTGTCTATT	7
CTGTGTTTTTA	7
CCGCATCTTCG	6
CAGCATTGACC	6
CAGCATTTGCT	6
CTGAGTTTTAT	6
CTGAGAAAACA	6
CTCCATTTTGG	6
CTGAGAAATTT	6
CGGTGTTTTTT	6
CAGCATTTCTT	6
CCGTATTGACG	6
CTGAGAAATTC	6
CCGCGTTTTTG	6
CCGCATTGACC	6
ATGCATTTCTT	6
CTGCATAGACC	6
CTGCATTAGCT	6
CTGCGTTTATG	6
CTGGGAAACTA	6
CTGCATGTTGG	6
CTGCCATTTTC	6
CTGCGTTTCTG	6
CTGCAGTTTGG	6
CTGCATTGGCC	6
CTGGGAAAACA	6
CTGCATTAACC	6
CTGCGTTTCTT	6
CTGCATCTTGG	6
CTGCATTTCCT	6
CTGCATTTATT	6
CTGCATTTAAT	6
CTGGGTTTCTT	6
CTGGGTGTATT	6
CTGTGTTGAAA	6
CTGTATCGACG	6
CTGGGTCTACA	6
CTGTGTTCTTT	6
CTGTGTTATTT	6
TTGCATTTTGG	6
CTGTCTTTATT	6
CTGGGTTTTTG	6
CTTTATTGAAA	6
CTGTATCTACT	6
GTGTGTTTTTT	6
CTGTGAAAAAC	6
CTGTGAGGATC	6
CTGTGAAAAAA	6
CTGTGTTTTGG	6
CTGTGAAATCT	6
CTGTCTGTACT	6
CTGAATTTCTT	5
CTGACTTTTTT	5
CCGCATCTAAT	5
CAGTGTTTATT	5
CAGCATCTAAT	5
CGGCATTTTGG	5
CGGTATTGAAA	5
CTGAATTGACC	5
CTACATCTAAT	5
CCGCGTTTATA	5
CTGCAAAACCC	5
CTGCTTTTATA	5
CTGCATATGCT	5
CTGGATTTTGG	5
CTGGGCTACGA	5
CTGGAAAAATC	5
CTGCGTATTTG	5
CTGCCTTTTGG	5
CTGCATTGAAC	5
CTGCGATTTTG	5
CTGCATTGAAA	5
CTGCCTTATTC	5
CTGCCTTTATT	5
CTGCATTTGCG	5
CTGCCTCTATA	5
CTGTGTTTGCT	5
CTGTATTTAGT	5
CTGTATTTGCC	5
CTTTGTTTTTT	5
CTGGTTTTAGA	5
CTTTATTTATC	5
CTGGGTTTACG	5
CTTTATTGACG	5
CTGTATTTCTT	5
TTGTGTTTTTT	5
CTGTTGGTTAA	5
CTGTGACGTGC	5
CTGGGTTTCTA	5
CTTGGACATTC	5
CTGTCGATCCT	5
GTGGGTTTATT	5
CAGTATTTATC	4
ATGCGTTTAGT	4
CTGCACAGCGG	4
CTATATTGACG	4
ATGCATCTAAT	4
CTGAGTTTCCA	4
CTGAGAAGTCC	4
CTGCACTGACC	4
ATGGGTTTACA	4
CTACATTTGGT	4
CTGAGATTCTC	4
CTGAGTTTAGT	4
CCGCAGTTTCA	4
CTACATCTTCG	4
CAGCGTTTAGT	4
CTAAGTTTTAC	4
CTGCACCTAAT	4
CGGTGTTTATT	4
ATGGGTTTTTC	4
CTGCAAAATTC	4
ATGCGTTTATA	4
CGGCATTGACC	4
CCGTATTTACT	4
CCGCATTTGGG	4
CTGCATTGATC	4
CTGCATCTGGG	4
CTGCATTCCTT	4
CTGCGCTTTTG	4
CTGGAGGTGTG	4
CTGCGTTTGGT	4
CTGGGAGTGTC	4
CTGCCTTCTTC	4
CTGCGTGTATA	4
CTGGCTTTGGC	4
CTGCGTCTAAT	4
CTGCATTTATA	4
CTGCGTTTAAT	4
CTGGCCTCGGA	4
CTGTGTTTTGT	4
CTGTCTTTTTC	4
CTGTCCTCGTT	4
CTGTGTCTTTT	4
CTGTGTGGAAT	4
CTGTGTTGACG	4
CTGTCTCTGGC	4
CTGTGAAATCA	4
CTGTATCTTCG	4
CTTCATTTGCT	4
CTGTATATATC	4
CTGTCTTTTTT	4
CTGGGTTTTTA	4
CTGTATTTACG	4
TTGTATTTACT	4
CTGTATTTAAT	4
CTGTGATTGTT	4
CTGTGTTTACA	4
CTGTATTAACG	4
CTGTCCGACCC	4
CTGTATTGGAA	4
CTGCAAAAAAT	3
CTACATTTGGG	3
CTGAGTTTTCT	3
CTACATTTGAC	3
CTGACCTTCTG	3
CCGCATTTGGT	3
CTGCAATTCTT	3
ATGCATTTGCC	3
CTCCATTGACC	3
ATGCATCTTCG	3
CTGAGTTTCTG	3
ACGGGTTTATT	3
CTGACTTTCAG	3
CTATGTTTTCC	3
CTGAATTTGCT	3
CTGAAGACGTT	3
CTCCCTTTTTC	3
CTATATTTACT	3
CAGCAGTTTCA	3
CAGTGTTTTCC	3
CTATGTTTATT	3
CTGAATTTGGG	3
CTGAGTATTTA	3
CAGTATTGACG	3
CTGAGTTTTCA	3
CTGAGACACTG	3
CTGACTTTCGG	3
CAGGGTTTACA	3
ATGCATTTGGG	3
CAGCGTTTATA	3
CTGCAACGTGC	3
CTGAGATTAGT	3
CTGCGTGTAGT	3
CTGGCCGTCCT	3
CTGCTTTTAGT	3
CTGGGAATTCC	3
CTGCGTTGATA	3
CTGCGGAATAT	3
CTGCATCGACC	3
CTGCGTTTGGG	3
CTGCGACTCGA	3
CTGCCTTGACC	3
CTGGCCGGCTT	3
CTGCGGCTCGA	3
CTGCGTTAATA	3
CTGGACAATTG	3
CTGCATCTATT	3
CTGCCTCTTTC	3
CTGCAGTTTCG	3
CTGCGTTTGCC	3
CTGCATTTCAT	3
CTGCCCTTTCG	3
CTGCATTTAGA	3
CTGCGCTTGTC	3
CTGCGCTATAC	3
CTGCATTTTCG	3
CTGCGCTAGTC	3
CTGCATTTTCC	3
CTGGCCCACTG	3
CTGCATTTTCA	3
CTGCATCTTTG	3
CTGGCTCTTCC	3
CTGCATCTGCT	3
CTGGCCTTAAA	3
CTGCATCTAAC	3
CTGCAGTTGGG	3
CTGCATCCAAT	3
CTGGGACTGGG	3
CTGCATTTCTA	3
CTGCGTTTAGA	3
CTGGGTTCACA	3
CTGTGCTTTTT	3
CTGTACTTATC	3
CTGTGATACGT	3
CTGGGTTTGGG	3
CTTCGTTTAGT	3
CTGTAGTCGCG	3
CTGTATTTGTC	3
CTGTAAAATCC	3
CTGTATTTGGT	3
CTGGGTTTTGG	3
CTTCCTTTTTC	3
TTGCATCTAAT	3
CTTTGTTTATT	3
CTGTAGTTTCA	3
CTGTGACTAAC	3
CTGTCCGTGTG	3
CTGTATTTACA	3
CTGTTCCGGCT	3
CTGTGAAGTCT	3
TTGCCTTTTTC	3
CTGGGGCTCGA	3
CTGTGCTAGTT	3
CTGTATTGAAC	3
CTGGGTTTTAC	3
CTGTATTAATC	3
CTGTGTTTTCA	3
CTGTTTTTACT	3
CTGTGATATCA	3
CTGTATATAAT	3
CTGTATAGAAA	3
CTGTACTTTTC	3
CGGGGTTTACA	2
CGGTATTTATC	2
CTGCAGGCAAT	2
CTGAGAGGTAG	2
CGGGGTTTTTC	2
CTGCAAGGTAG	2
ATGCATTTTTG	2
CTGACCAAAAC	2
CTGACTGCACT	2
CTGAGTCTTAC	2
CTGAGTTTACA	2
CTGAATTTTAC	2
CTGAGTTATGG	2
CTGAGTATCTA	2
CGGCGTTTTTG	2
CTAAGTTTTTA	2
CGGCCTTTTTC	2
CTGAGAATTTT	2
CCGAGTTTTTA	2
CTACGTTTAGT	2
ATGTGTTTAGT	2
CTAGGTTTACA	2
ATGTATTTACT	2
ACGTATTCATC	2
CTCAGTTTTTA	2
CTGAAAAAAAT	2
CTGAGTTTTTC	2
CCGGGTTTACA	2
CTGACTTTTTA	2
CAGCATTTGCC	2
ATGACTTTTTC	2
CTCCGTTTTTG	2
ATGCCTTTTTA	2
CTGAATTTACT	2
ATGCATTTTGT	2
CTGACCCTGAT	2
ATGCATTTGGT	2
CTGAGCTTTAC	2
CTGCAGCTAAT	2
CAGAGTTTTAC	2
CTGAGTTTCTT	2
CTGAGATTGTG	2
CCGAGTTTCTA	2
CTCCATCTAAT	2
ATGAGTTTTTA	2
CTGATTTTTTA	2
ATGAATTTTGG	2
CTGAATCTAAT	2
CTGAAGTCGCG	2
CTACGTTTATA	2
CTGCAGGTTTA	2
CTGCATTAGAA	2
CTGCATCAAAT	2
CTGCATCTTCA	2
CTGGGAAGATA	2
CTGCGAGAAAT	2
CTGCCTTTTAC	2
CTGCATGTCTT	2
CTGCGGTTATA	2
CTGGCTTTATT	2
CTGCCTCTGGT	2
CTGCATATGCC	2
CTGCAGTCTCA	2
CTGCATTCACC	2
CTGCCTATTTC	2
CTGCGATTAGT	2
CTGGATTTGCT	2
CTGCCTTTTTG	2
CTGCGTTTAGC	2
CTGCATTTTAC	2
CTGCCTTTGTC	2
CTGGCTTGGGA	2
CTGCGCTTAGT	2
CTGCATATGGG	2
CTGGCCTACTA	2
CTGCATATAAT	2
CTGCCTTTCTT	2
CTGGATTTGGG	2
CTGCCCGAAAT	2
CTGCGTTATTG	2
CTGCGTTTACA	2
CTGCGAATAAT	2
CTGCGTTTGAC	2
CTGCATGTGCT	2
CTGCTTTTTGG	2
CTGCCTTGTTG	2
CTGCATTGTAA	2
CTGGGACACGA	2
CTGCGTTGTTG	2
CTGCGAGGATC	2
CTGCGTTGGAA	2
CTGCATCTGAT	2
CTGGAATGTCT	2
CTGCATTTGTG	2
CTGGGCTTACG	2
CTGCGTTTGTG	2
CTGCATTGACG	2
CTGCGTCTTTG	2
CTGCGCAAGAA	2
CTGCGTCTCCA	2
CTGCGAAGAAT	2
CTGCATATAGG	2
CTGGAATAAAC	2
CTGCGAGCAAT	2
CTGCGTTCAGT	2
CTGCGTTTCCC	2
CTGCATTCGGG	2
CTGGCGTTAAA	2
CTGCGTTTTAG	2
CTGGCCTCAGC	2
CTGGGAAAGTC	2
CTGGGTATATT	2
CTGTGTTTTAT	2
CTGTGGAATTC	2
CTGTATTGAAT	2
TTGTATTGACG	2
TTGCGTTTAGT	2
CTGGGTGGAAT	2
CTGTGACTATA	2
GCGGCCACATT	2
CTGTACTTACT	2
CTGTCCTTATT	2
CTGTACTGAAA	2
CTGTGTTTCCC	2
CTGTACAAAAA	2
CTGGGTTAAGT	2
CTGTAATGAAA	2
CTGTAGTGAAA	2
CTGTATTCACT	2
CTGTGATTTTT	2
CTGTATTCAAA	2
CTGTATATACT	2
CTGTGACTCTA	2
CTGTGTTGTTT	2
CTGTGTTCATT	2
CTGTGTTTGCC	2
TTGTATTTATC	2
TTGTGTTTATT	2
TTGCATTTGCT	2
CTGTCCTATTC	2
CTGTGAAACGG	2
CTGGGTTAGGT	2
CTGTGTCAATA	2
CTGGGTTAACA	2
CTGGGTTTTCT	2
GTGCATTTGGG	2
CTGTGAAACCA	2
CTGTCTTCGAT	2
CTGTGTTTAAT	2
CTTAGTTTTTG	2
CTTCATTGACC	2
CAGCATTATGG	1
CTGACTTGTTA	1
ATGTATTTATA	1
CTGCACTTGGT	1
ATGAGTTTTAC	1
CTGACCCAAAG	1
ATTGGTTTACA	1
CTGAGTATTAC	1
CTGAGTTGATA	1
CGGCGTTTAGT	1
ATGCATTGGAA	1
CTGACAGCCGT	1
ACGACCTGAGG	1
CTGAATTTTGT	1
CAGAGTTTCTA	1
CTGCAACATCT	1
CTAGGTTAAAA	1
CTGAGGGTTCA	1
ATGGTTTTATT	1
CCGTGTTTTTC	1
CTACATTTGCC	1
CTGCAAATTGG	1
CTGAGTTATAC	1
CCGTGTTTAGT	1
ATGCAGTTTCA	1
CTGAGGGCGCA	1
ATGAATTTGCT	1
CTGAATTTGCC	1
CTGATTTTCTA	1
CTGCAAATAAT	1
CTGATCCCGAC	1
CTGAATTTCTA	1
CACGGTTTATT	1
CCGTATTCATC	1
CTGAGAAAACT	1
CCGGGTTTTTC	1
ATGTCTTTATT	1
CTGAGCTTTTA	1
CTGAGTTTAAA	1
CTGCACTTGGG	1
CTGACTTTTTG	1
CTGAATTGGAA	1
CTGAGTTCTTA	1
CTGAATTGATC	1
CTGCAGACGTT	1
CTGAATTGACG	1
CTACAGTTTCA	1
CTGAGCCACAG	1
ATGCATTTGAC	1
CCGCATTTTTC	1
CTGCAGCTTCA	1
CTGAATGTAGT	1
ATGATTAAGCG	1
CTGAGATTTTT	1
CGGTGTTTAGT	1
CTGAGATTTTA	1
CGGTATTGACG	1
CTGAGATTTAC	1
CTGACCTTAAT	1
CCGCATTTGCC	1
CTGAGAAGCAA	1
CCGCATTTGAC	1
CTGAGTTTCAA	1
CTGAACCTGAT	1
CTGAGAAACTA	1
CCGCATTGGAA	1
CAGAGTTTATG	1
CTGAAATTTGT	1
CACAATTGAAA	1
CTGAGATTGTT	1
ATTCATTTTGA	1
CTGAAACGTGC	1
ATGTGTTTTCC	1
CTGAGTTTTAG	1
CTGATATTCAG	1
CTCTATTTATC	1
CTGATATAAAA	1
CCGAGTTTTAC	1
CTGATAAAATA	1
CTCTATTTACT	1
CTACCTTTTCC	1
CCGAGGGTGCA	1
CTACATTTTTC	1
CCCGCCACATT	1
ATGGGTTTATA	1
CTGAGATTGAT	1
ATGGGATTATT	1
CTGCAAAAGAG	1
CTGACTTTTAC	1
CTGAGATTCTA	1
CTGAGTTCTAC	1
CAGTGAAGTTT	1
CTGACTTTATC	1
CTGAGTTTTAA	1
CTGACTTGATC	1
CAGTATTTACT	1
CTGACTTAAGC	1
CTCCATTTGCC	1
CTAAGTTTCTA	1
CAGTATTGAAA	1
CTAAGTTTATT	1
CAGTAATAAAC	1
CTAAGTTTACA	1
CTCCATTTCTT	1
CGGTGTTTTCC	1
CTGAGATATTA	1
ATGATTTTTTG	1
CAGGCCGTCAT	1
CTGACTCTGAT	1
CTCCATCTTCG	1
ATGAGTTTCTA	1
CTGAGTTTGCC	1
CTGCAACTTCG	1
CTGCACTTGCT	1
AGGGGTTTATT	1
CTGAGACTAAC	1
CTGAGTCCAAT	1
CTGCAATTGCC	1
AAGTATTTATC	1
CTGCACTTCTT	1
AAGCGTTTTTG	1
CTATGTTTAGT	1
CTGCCCGTGGG	1
CTGGCTTTCAG	1
CTGGCTTTTTC	1
CTGCGTTATTT	1
CTGCATTAAAA	1
CTGGATTGACC	1
CTGCATCTCTT	1
CTGGCGGTAAC	1
CTGCATATTCA	1
CTGCGACCTAC	1
CTGCAGTTACA	1
CTGCGTTATCC	1
CTGCTTTTTTT	1
CTGCATTTGAA	1
CTGGGATTACA	1
CTGGGAGTAAA	1
CTGCATCTAGA	1
CTGCATTTCTG	1
CTGCATCGAAT	1
CTGCGAAAGTT	1
CTGCGATTTGG	1
CTGCGTTTCTA	1
CTGCGTTCCCC	1
CTGGCCTACTT	1
CTGCTTTCTGC	1
CTGCGTTTTTC	1
CTGCATGTGGG	1
CTGGGAATACG	1
CTGCATGGAAT	1
CTGGGCTTACA	1
CTGCCCGTCCT	1
CTGGATTGAAA	1
CTGCCAAAAAT	1
CTGCGTTTTGT	1
CTGGGATTGCG	1
CTGGCCTACTC	1
CTGCATCTACG	1
CTGCGTCTTCG	1
CTGCATCGTCG	1
CTGGGACTCCG	1
CTGCATTTTGC	1
CTGCCTTTGGT	1
CTGGCTTTGAT	1
CTGCCTTTGCC	1
CTGCATATCAT	1
CTGCGTCTACA	1
CTGCGATTATA	1
CTGCATTTAAC	1
CTGGCTTAGAT	1
CTGGGAACCTA	1
CTGCATTTGGC	1
CTGCATTGTCC	1
CTGCGTTTACT	1
CTGCATTGTAC	1
CTGCCGTTTTC	1
CTGGGACATTA	1
CTGCGTTTTCC	1
CTGCATTGGCT	1
CTGCATGTAAT	1
CTGCGTCACTG	1
CTGCGCTTATA	1
CTGCATTGGAT	1
CTGCATCTTCT	1
CTGCATTGGAG	1
CTGCATCTTCC	1
CTGGCCGACCT	1
CTGCGCTATCA	1
CTGCGTTTAGG	1
CTGGATCTTCG	1
CTGCCTTGTTC	1
CTGCATCTCCG	1
CTGCGTAATTG	1
CTGCATCTAGT	1
CTGGGAGGTTT	1
CTGCATCTACT	1
CTGCCTTCGCC	1
CTGGATTTTCA	1
CTGGGCGAACC	1
CTGCATCTAAA	1
CTGCCTGTATC	1
CTGGCTTTGTG	1
CTGCGGCTGCG	1
CTGCGCTACAA	1
CTGGCCCAATG	1
CTGGATTGACG	1
CTGCCTCTTCG	1
CTGCATATGGT	1
CTGGCCAGACC	1
CTGGACAACAT	1
CTGCATTCGCC	1
CTGCATATCTT	1
CTGCCTCTGTC	1
CTGCGATTTCT	1
CTGGATGTTTT	1
CTGCGATTCCG	1
CTGCATTATGT	1
CTGCGTTCTGT	1
CTGGGATTTTC	1
CTGCAGTTTAA	1
CTGCATTAGGT	1
CTGCAGTTGCC	1
CTGCGGCACTG	1
CTGCAGTGACC	1
CTGCATTAGCC	1
CTGCAGTATCA	1
CTGCCTCGCGA	1
CTGCATTACTT	1
CTGTCCGTTCG	1
CTGGGTTCTTC	1
TTGCATTGAGG	1
CTGTGTTTAAA	1
CTTGGTTTATA	1
CTGTGCTATTA	1
CTGTCCAGCGG	1
CTGTGTGCATC	1
CTGTGACAGAT	1
CTTCATTGACA	1
GTGCATTTTGG	1
CTTGGTTTACA	1
CTGTGTTAATT	1
CTTCATCTAAT	1
CTGTGTATATT	1
CTGTATTGATC	1
CTGGGTTTGCG	1
CTGTATTGATA	1
CTGTGGGTTCA	1
CTGTATTGAGT	1
CTGTGTTTCCG	1
CTTCAATTTTT	1
GTGCGTTTTTG	1
CTTGGTTTAAT	1
GCGGCCTTAGA	1
CTTAGTTTTTA	1
CTGTCCTCAAA	1
CTTAGTTTCTA	1
CTGTCCTAGTT	1
CTTAATTTTGG	1
CTGTGAGACTC	1
CTGTGCCTTAC	1
CTGTCCCCCTA	1
CTGTGTTGATT	1
TTGCGTTTTTG	1
CTGTCTTTTTA	1
CTTCGTTTATA	1
CTGTTTTTTCA	1
CTGGGTTTCCC	1
CTGTTTTTATT	1
CTGTGACATCC	1
CTGTCTTTCCG	1
CTGTATTTGAC	1
CTGTGTCTTCC	1
GTGTATTGAAA	1
CTGTCTTGAAA	1
CTTCATTTGGG	1
CTGTATTAACT	1
CTGTATTTAGA	1
CTGTCTTCTTT	1
CTTCATTTCTT	1
CTGTTTTTATC	1
CTGTGCTGTTC	1
CTGTATGTACC	1
CTGTATTTAAC	1
CTGTGATTGTA	1
CTGGTTTTTTC	1
CTGTTTTTAGT	1
CTGGTTTTATA	1
CTGTCTTCCTA	1
CTGGTTTTACA	1
CTGTTTTGACG	1
TTGCATTTGGG	1
CTGTTTTGAAA	1
TTGCATTTCTT	1
CTGTCTTCCAA	1
CTGTCCCTCCT	1
CTGTCTGTCCG	1
CTGGGTTTTCC	1
TTTCATTGCGG	1
CTGTCCAAATT	1
CTGTCTGCCCT	1
TTGCATTGGAA	1
CTGTATAGACG	1
CTGGGTTTGCC	1
CTGTCTGAACC	1
CTGGGTTTGAC	1
CTGTGATCTCT	1
CTGTATTTTTC	1
CTGTAGTTATC	1
CTGTGGTTTGT	1
CTGTAGTTACT	1
CTGTGTTCTCC	1
CTGTCTATTAT	1
CTTCATTTTTG	1
CTGTCGTTGGC	1
CTGTGTTTCTA	1
CTGTAGAAAAC	1
CTGGGTTTACC	1
CTGTGTTATCC	1
CTGTGAATGCA	1
CTGTACTTTCC	1
CTGTGTTTATG	1
CTGTCCTTTTT	1
TTGCGTTTATA	1
CTGTCCTTTTA	1
CTGTGTGTATT	1
CTGTACTGACG	1
CTGTGAAGTCC	1
CTGTCCTTGGG	1
CTGGGTGTCTT	1
CTGTACAGCGG	1
CTGGGTGTAGT	1
CTGTGTCATGC	1
CTGGGTCTTTC	1
CTGTAATGTCT	1
CTTCATTGGAA	1
CTGTAATGACG	1
CTGGGTAAATT	1
CTGTCCTTATA	1
CTGGGGTACAG	1
CTGTAAGGATC	1
CTGTGAGTAGT	1
CTGGGCTTTTC	1
CTGTATTGTAC	1
CTGTATTGTAA	1

## Sheet: ApsCas9 PAM_counts
7mer	counts number
CTGACTTAAAA	114191
CTGACAAAAAA	79389
CTGACCAAAAA	49086
CTGTCATATCG	37788
CTGTCCAAACG	29245
CTGTACAAAAT	24065
CTGTACAAAAA	23820
CTGACCAAACA	13341
CTGTCCAAATT	8388
CTGCCAATAAG	7453
CTGACAAAACC	6822
CTGCACAAAAG	6587
CTGTCAAATCC	6320
CTGACAAACAC	5345
CTGACAACAAA	4380
CTGCCTTAAGG	3495
CTGGCATAAGT	3215
CTGCCAGTTAT	2490
CTGAACAAACA	1411
CTGCCTCATCA	1323
CTGACAAGAAA	1179
CTGGCAAAAGC	1097
TTGACAAAAAA	231
CTGATAAACAC	138
CTGACTTAAAG	100
CTGACAAAAAG	94
CTAACAAAAAA	72
CTGCCAATTGT	58
ATGACTTAAAA	55
CTATACAAAAA	53
CTGTTATATCG	51
CTGTCCAAACA	49
CCGACTTAAAA	45
CTGACCTAAAA	45
CTGGAGCCAGG	39
CTGTCATATCT	37
CTGACTTAAGA	37
CTTACTTAAAA	35
CTGAGAAATGT	34
CTGTCTATTTG	33
CTGTCATATCA	33
CTGACAGGGGC	33
CTGCGCACGCG	32
ATGACAAAAAA	32
CTGTCAAGACA	28
CTGATAAAAAA	28
CTGACGAAAAA	28
CTGACCAAAAG	28
CCGACAAAAAA	28
CTAACTTAAAA	27
CAGACTTAAAA	26
CTAACCAAAAA	26
CTGTACAAAAG	25
CCGACCAAAAA	25
CTGTCCAAACT	24
CTGCATTTTGG	24
CTGGCTTAAAA	24
CTATACAAAAT	24
CTGAATTAAAA	24
CTGTCGAATCC	23
CTGGCAAAAAA	23
CTGACTAAAAA	21
CTGACTCAAAA	21
CTGACAAAAGA	21
CTGTGAAACGG	20
CTGGTTGTGAA	20
CTGACCTTATC	20
CTATCATATCG	20
CTGACAAAGAA	20
CTGAGATAATT	19
CTGACTTGAAA	19
CTGATTTAAAA	19
CTGCAAAAAAT	18
CTGACTGTTTG	18
CTATCCAAACG	18
CAGACAAAAAA	18
CTGACCCAATG	17
ATGACCAAAAA	17
CTGTCATATAG	16
CTGACTTAATA	16
CTGACTTAGAA	16
ATGTCATATCG	16
CTGTACAAAAC	15
CTGACCAAGAA	15
CTGGGTTTATT	14
CTGGCCAAAAA	14
CTGGCCCAATG	14
CTGACATAAAA	14
CTGACAAAACA	14
CTGACAAAAAC	14
CTGTCGATTCA	13
CTGTCTTTATT	13
CTGTCAAAACG	13
CTGATCAAAAA	13
CTGCATTCTCC	13
CTGACTTAACA	13
CTGACTTAAAC	13
CTGACAAAATA	13
CTGACAGAAAA	13
CTGACGATTCA	13
CTGAACAAAAA	13
CTGACCAAGCA	13
CTGACAAAAAT	13
CCGTCATATCG	13
CTTACAAAAAA	12
CTGTATATAAT	12
CTGTCCAATGG	12
CTGACTTTAAA	12
CTGCCATATCG	12
CTGCGAACCCC	12
CTGACAAACAA	12
CCGTCCAAATT	12
ATGTCCAAACG	12
CTGTCGTATCG	11
CTGGCCTTAAA	11
CTGCACGTGAT	11
CTGGCTATAAC	11
CTGGCTATCGG	11
CTGGACAAGTC	11
CTGACAATTGT	11
CTGTCATACCG	10
CTTTCATATCG	10
CTGTCCAAAAA	10
CTGTCCAAATG	10
TTGACCAAAAA	10
CTGTCAATAAG	10
CTGTCCGAACG	10
CTGGCGAAGTT	10
CTGACTTTCAG	10
CTGACTTACAA	10
CTGACCAAACG	10
CTGACCAAGCT	10
ACGTACAAAAA	10
CTGAAAAAAAA	10
CTGACACAAAA	10
TTGTCATATCG	9
CTGTCTTAAAA	9
CTGTGATATCA	9
CTGTCGTAGTA	9
CTGTCAGTTTG	9
CTGCACAAAAT	9
CTGCCAGATGC	9
CTGGCACTCTA	9
CTGGCAAGTTC	9
CTGACCAACAA	9
CTGACCAAAGA	9
CCGTACAAAAA	9
ATGTACAAAAA	9
CTGGGTGAACG	8
CTGTGTTTATT	8
CTGTCGACCGT	8
CTGTTGGCGTC	8
CTGGCCCAATT	8
CTGACTTATAA	8
CTGAGCAAGCC	8
CTGCGCTCGAG	8
CTGACTTAAAT	8
CTGATAAAACC	8
CTGACCAAAAC	8
CTGACCGAAAA	8
CAGTCATATCG	8
CAGTACAAAAT	8
CCGTACAAAAT	8
CTGACATATCG	8
CTGTCTGTACT	7
CTGTTCAAACG	7
CTGTCATGTCG	7
CTGTAAAATCC	7
CTGTATAAAAT	7
CTTTCCAAATT	7
CTTACCAAAAA	7
CTGTCGATACG	7
CTGTACAAGAA	7
CTGTAGCCAGG	7
CTGTCAAAATT	7
CTGTCAAATCG	7
CTGTCCAGACG	7
CTGCACAAAAA	7
CTGATGGCTAG	7
CTGACTGAAAA	7
CTGCATTTCTA	7
CTGCCATCTTC	7
ATGTACAAAAT	7
ACGACTTAAAA	7
CTGACCAAATA	7
CTGAACAATTG	7
CTGACCCAAAA	7
CTGAAGCCAGG	7
ACGACAAAGAT	7
CGGTACAAAAA	7
CTGACCAAACC	7
CTGTCACATCG	6
CTGTCAAAAAA	6
CTGTCCTATTC	6
CTGTCCAAAAG	6
CTGTCATATTG	6
CTGTCCCAATG	6
CTGTAATATCG	6
CTGTCCTATCG	6
CTGTCTATTCC	6
CTGGCACATTC	6
CTGCAGCAAGC	6
CTGGATTTTCA	6
CTGACTTCAAA	6
CTGCCGAATTT	6
CTGCCTACTTG	6
CTGACCAATAA	6
CTGAATTTAGT	6
CTGACAATATA	6
CTGACAGTTAT	6
CTGACAATAAA	6
CTGACAGTTCG	6
CTGACCAGAAA	6
CAGTCCAAACG	6
CCGTCCAAACG	6
CAGACCAAAAA	6
CTTTCCAAACG	5
CTGTGCTTTTG	5
CTGTCCAAAAT	5
CTGTCCAAATC	5
CTGTTCTTAAA	5
CTGTATAAAAA	5
CTGTCTTCCAA	5
CTGTACAAATT	5
CTGTGACGTCA	5
CTGTACAAAGA	5
CTGTGGTTTGT	5
CTGTACAATAT	5
CTTTACAAAAA	5
CTGTCTACAAA	5
TTGACTTAAAA	5
TTGTACAAAAA	5
CTGCACACAAG	5
CTGGCAAAGGC	5
CTGCCAGTACA	5
CTGCACAAAGG	5
CTGACGTTGCA	5
CTGCGTGGAAT	5
CTGACTTATCG	5
CTGCCAAATCC	5
CTGGCCTAAGG	5
ATGACCAAACA	5
CTAACAACAAA	5
CTAACAAAACC	5
CTGACAACCAA	5
CAGTACAAAAA	5
CTGACAAATCC	5
CTACACAAAAG	5
ATGACAAACAC	5
CTGTGTTTTTT	4
CTGGGAAACTA	4
CTGTACATAAA	4
CTGTACAAGAT	4
CTGTGCAAAAT	4
CTGTAAAAAAA	4
CTGTACAGAAT	4
CTGTCCAACTT	4
CTGTCTTGTTT	4
CTGTCGTTGCA	4
TTGACAAACAC	4
CTGTCTAAACG	4
CTGTACGAAAA	4
CTGTCTATGAA	4
CTGTTAAATCC	4
CTGTACACAAT	4
CTGTCATAACG	4
CTGTACAAATA	4
CTGTACAAACG	4
TTGTCCAAACG	4
CTGGGAATTTT	4
CTGCCGTTGCA	4
CTGACTCTTCT	4
CTGCCCAAACC	4
CTGCCTCAGGA	4
CTGGCATTGCT	4
CTGAGTTTTAC	4
CTGAGTTAAAA	4
CTGGCCGACCT	4
CTGCCTTTTCT	4
CTGAGAACCGG	4
CTGCCAGATCG	4
CTGACGTAAAA	4
CGGACCAAAAA	4
CTGACAAGCAC	4
CTATCCAAATT	4
CTGACAGTGCC	4
CTGACCAAGTA	4
ATGACAAAACC	4
CTGACAGAAAG	4
CTGACAAATAA	4
CTCACAAAAAA	4
CTGACGTAGTA	4
CTGACCAGACA	4
CTGACGATACG	4
CTGACCATAAA	4
CGGACAAAAAA	4
CTGACCATATC	4
CTGAACAAATT	4
CTGTTCAAATT	3
CTGTCGAAGAT	3
CTGTCATAGTT	3
CTGTCATCTCG	3
CTGTTCAAAAA	3
CTGTAATGTCA	3
CTGTAGCAAGC	3
CTGTCGAAGTC	3
CTGTCCTTATA	3
CTGTCATCCGC	3
CTGTCAATAGC	3
CTGTGCATACA	3
CTGTCCAAGCG	3
CTGTGCTATGC	3
CTGTCATTTCG	3
CTGTACAACAT	3
CTGTACGAAAT	3
CTGTCTATTTT	3
CTGTACAAACA	3
CTGTCAGAGTT	3
CTGTACATAAT	3
CTGTCAAATCA	3
CTGTACTTACC	3
CTGTACAAAGT	3
CTGTCTATGGT	3
CTGTCAGGGGC	3
CTGTCACTCGC	3
CTGTGCAAAAA	3
CTGTCTGTCCG	3
CTGTACAGAAA	3
CTGGTCAAACT	3
CTGTCCAGATT	3
CTGACTGACAT	3
CTGGCCATGGT	3
CTGGCATATTG	3
CTGATTAACAC	3
CTGCCCTTTGT	3
CTGCCCAAACG	3
CTGGCATACCC	3
CTGGCTTACGT	3
CTGACTTAAGG	3
CTGCCTATGGA	3
CTGCATTTGAC	3
CTGCACAGAAG	3
CTGGCTTTGGC	3
CTGGCTTTTCA	3
CTGCCGCTGCT	3
CTGATAAGCTG	3
CTGGCATAGGT	3
CTGATGACTTT	3
CTGGCATCTAT	3
CTGGCAAAGAC	3
CTGCATTTAGT	3
CTGCCTGCTCG	3
CTGCCTTTGTA	3
CTGCATAAAAG	3
CTGCCTTTGTC	3
CTGGCAATCGC	3
CTGATCAAACA	3
CTGGCACAAGT	3
CTGCCAAGTAT	3
CTGCCTTAAAA	3
CTGGCTCTATA	3
CTGCATCACCA	3
CTGATACAATG	3
CTGCTCAAGGT	3
CTGCCATTACT	3
CTGACCAAAAT	3
CTGACGTAACA	3
ACGACAAAAAA	3
CTGACGTATGC	3
CTGACACGAAA	3
CTGAATGACAT	3
CTGACCAAATG	3
CAGTCAAATCC	3
CTAACCAAACA	3
ATGCACAAAAG	3
CTGACACACAC	3
CAGTCCAAATT	3
CCGTCAAATCC	3
ATGCCAATAAG	3
CGGACTTAAAA	3
CCGACAAACAC	3
CTGACCAATGG	3
CTGACAACGAA	3
ATGTCCAAATT	3
CTGACGACAAA	3
CTGACGATTGG	3
CCGACCAAACA	3
GTGACTTAAAA	2
CTGTCAAACCC	2
CTGTGTTTATC	2
CTGTCCATACG	2
CTTCCAATAAG	2
CTGTAAAAAAT	2
TTGTACAAAAT	2
CTGTCCCAATT	2
CTGTGTTTTCC	2
CTGTCAATATC	2
CTGTACAAACC	2
CTGTCAATTGC	2
CTTTACAAAAT	2
CTGTCAATTGT	2
TTGGCATAAGT	2
CTGTCGCACCG	2
CTGTACAATGG	2
CTGTCGTCCGT	2
CTGTCATTCGT	2
CTGTCGTTGAG	2
CTGTCAAAATC	2
CTGTCAGGCGT	2
CTGGGTGCAAA	2
CTGTCTCTGTT	2
CTTACCAAACA	2
CTGTACTTTTG	2
CTGTCCAAATA	2
CTGTCATAGTA	2
GCGGCCATAAG	2
CTGTCTTATCA	2
CTGTCAACTCA	2
CTGTCTTATGG	2
CTGGGTTTACT	2
CTGTACAACAA	2
CTGTCCACACG	2
CTGTCTTTGGT	2
CTGTCATATGG	2
CTGGCTTAGAC	2
CTGATTGTGAA	2
CTGGCGCTCCC	2
CTGCCCTAGAG	2
CTGGCCAAGTT	2
CTGCCCTTTCG	2
CTGGCCTACTT	2
CTGCCAATAAT	2
CTGGCTATTCT	2
CTGAGCAAACA	2
CTGCCTTAAGT	2
CTGGCAAAAGT	2
CTGGCCATTTC	2
CTGCCAGACAC	2
CTGGCCGTCCT	2
CTGCCGCTGTC	2
CTGCGCAAAAG	2
CTGCCGTCCCC	2
CTGCCCAAAGG	2
CTGCAAAAAAG	2
CTGCGTTTAAT	2
CTGGCAATTGT	2
CTGGCATTTTA	2
CTGACTTTTTT	2
CTGGCCAAACA	2
CTGGCACAATT	2
CTGCCTTTGCG	2
CTGCCAGCGAG	2
CTGATCTTATT	2
CTGCCAGCTAT	2
CTGACTACCTA	2
CTGGCAGGGGC	2
CTGCACAAGAG	2
CTGGCATAAAA	2
CTGGCCTATTT	2
CTGGCATAAGC	2
CTGATAACAAA	2
CTGCATTAAGG	2
CTGGCGTAGAC	2
CTGAGCGTACC	2
CTGCGTCAAAG	2
CTGCCTGGAAC	2
CTGCCCATACT	2
CTGCCTGTAAG	2
CTGAGTTAGTT	2
CTGCCAGTTGT	2
CTGATCATAGG	2
CTGCCATTGAA	2
CTGCCCGTGGA	2
CTACCAATAAG	2
CGGTCATATCG	2
CTGACAAATAC	2
CCGACAACAAA	2
CTGACAACAGA	2
CTGACAAGACA	2
CGGACCAAACA	2
CTGACAAGAGA	2
CTGACCAAATT	2
CTACCAGTTAT	2
CTGACCACAAA	2
CTGACGAAACC	2
CTAACAAACAC	2
CTCTCATATCG	2
CTGACATTTTC	2
CAGGCATAAGT	2
CTGACAAAGCC	2
CTCTCCAAATT	2
CTGAACAAAAT	2
CTGACAAAACT	2
CTGACCAACAC	2
CAGACCAAACA	2
CTGACAACAAT	2
ATGCCTTAAGG	2
CTGACCACACA	2
CTGACAGCAAA	2
ACGCCTCGTTT	2
CTGAACAAAAG	2
CTGACAACCAC	2
CTGACATAGTG	2
CTATCAAATCC	2
CTGACATCATA	2
CTGACGAAGGG	2
CTGACAATAAG	2
CTGACGAGGCT	2
ATGCCTCATCA	2
CTACCTTAAGG	2
CTGACAATTCC	2
CCGCCAATAAG	2
CTGTCACATCT	1
CTGTCCAAGTT	1
CTGTCAAATGT	1
CTGTCGTTGGC	1
CTGTTCGTTGA	1
CTGTCGTTTCA	1
CTTCCTTAAGG	1
CTGTCAGATCG	1
TGCGACTGTGT	1
CTGTCCCTCAC	1
CTGTCAGATCC	1
CTGTCTACCAA	1
CTTAAAAAAAA	1
CTGTCTACTAT	1
CTTACTTAAAG	1
CTGTCTATACG	1
CTGTCGGAGTC	1
CTGGGTTTGGT	1
GTGACAAAAAA	1
CTGTCAGTGGA	1
CTGGGTAGATA	1
CTGTCAGTGGC	1
CTGTCGTTACC	1
CTGTCAGTTAT	1
CTGTCAAATAC	1
CTGTACTAAAA	1
CTGTCCAAACC	1
CTGTCTCTGGC	1
CTTAATTAAAA	1
CTGTACCAAAA	1
CTTACCAAGCA	1
CTGTACAAATC	1
CTTCACAAAAG	1
CTGTCTGTATT	1
CTTTAAAAAAA	1
CTGTCCGAATT	1
CTGTCAAATCT	1
CTGTCCGACAA	1
GCGGCCAACTG	1
CTGTCCGTCCT	1
CTGTCAGAACT	1
CTGTCTTATCG	1
TTGACAAAAAG	1
CTGTCCTAGAC	1
CTGTCAACTCC	1
CTGGGTTTGTC	1
CTGTCCAGCGG	1
CTGTCTTGAAT	1
CTGTCCACATA	1
CTGTCCAGCTC	1
CTGTCACAATC	1
CTGTAATGTCT	1
CTGTTCGAATC	1
CTGTCAATCGC	1
CTGGTCGGATA	1
CTGTCATATCC	1
CTGTTTGTGAA	1
CTGTGAACCGG	1
CTTAACAAACA	1
CTGGTATACGC	1
CTGTACCAAAT	1
CTGGGAATATT	1
CTGTACCTAGC	1
CTGTGATATCG	1
CTGTCCAAAGT	1
TTTACTTAAAA	1
CTTACTTAAAT	1
CTGTCCACATT	1
CTGTCGCAACT	1
CTGTGCAAATT	1
CTTGCATAAGT	1
CTGGTCAATCC	1
CTGTCAAGTCC	1
CTGTCAAAACA	1
CTTTCAAATCC	1
CTGTCATCTTG	1
CTGTCAAATGG	1
CTGTGGCACGC	1
GAGAGCAACTC	1
CTGTCAATGTA	1
CTGTCGTAGAA	1
CTGTGTATAGG	1
GTGACCAAAAA	1
CTGTGTGGGGC	1
GTGTCCAAACG	1
CTGTCCTTCTT	1
CTGTCCAACGA	1
CTGTCAAGCAC	1
TTGACAAAACC	1
CTGTGTTTCCC	1
TTGACAACAAA	1
CTGTCCCAACG	1
TTGACCAAACA	1
CTGTCATTCTA	1
TTGATAAAAAA	1
CTGTCGAATCA	1
CTGTCGTCCTA	1
CTGTTATAACG	1
CTGTCCCGAAG	1
CTGTCATTTTT	1
TTGTCCAAATT	1
CTGTACACAAA	1
CTGTTCAAAAT	1
CTGTATCACCA	1
CTGGCATATGT	1
CTGGCGTACGA	1
CTGCCAATAAA	1
CTGCCTTACGA	1
CTGCCCATCGC	1
CTGCCTTACTA	1
CTGCCAAACAA	1
CTGCCTTCCTT	1
CTGCCAATAGT	1
CTGCCTTGGCC	1
CTGCCAATGTT	1
CTGCCTTGTTA	1
CTGAGAACAAA	1
CTGCCTTGTTG	1
CTGGCATTCTC	1
CTGCACAATAG	1
CTGAGAACCCC	1
CTGAGCAAAAA	1
CTGCCAATAGG	1
CTGATGTGTGG	1
CTGCCAATATG	1
CTGCACCGGAG	1
CTGCCAATGAG	1
CTGCCAGCGTT	1
CTGACTTTATC	1
CTGATTAAACA	1
CTGGCATAAAT	1
CTGCCAGTAAG	1
CTGGCATACGG	1
CTGACTCATCA	1
CTGCCCTTATA	1
CTGCGGCACGC	1
CTGGCATTGTA	1
CTGCGTATTTT	1
CTGCCAACGAT	1
CTGCCAGTCAT	1
CTGGCCATACA	1
CTGACTGGGGC	1
CTGCACAAATG	1
CTGCGTTATCG	1
CTGCCTCAACA	1
CTGCCAGTTCT	1
CTGGCGAAACA	1
CTGCTAATAAG	1
CTGCCTCATCG	1
CTGAGCAAGCG	1
CTGGCGTATGA	1
CTGCTCTGGGT	1
CTGCCTGTTCT	1
CTGCTTCTTTT	1
CTGCCTTAACT	1
CTGGAAAAGGA	1
CTGGCAGGAGA	1
CTGGACAAAAA	1
CTGCCCATGGG	1
CTGCCATAAGG	1
CTGCAAGTTAT	1
CTGGACTAAAG	1
CTGCCCTACGA	1
CTGCCATAGGG	1
CTGCCAAAAAA	1
CTGGATTTACA	1
CTGCCCTAGTC	1
CTGGATTTAGA	1
CTGGCATGAGT	1
CTGCATCATCA	1
CTGCCAAAAAG	1
CTGCCATCCCG	1
CTGGCATTTCA	1
CTGGCAAAAGA	1
CTGATCAAGTA	1
CTGCATCTAAA	1
CTGGCCAAATT	1
CTGACTTAGGT	1
CTGGCCAATAC	1
CTGGCAAAATC	1
CTGCCGTAAAG	1
CTGCATTATCG	1
CTGACTGTTTA	1
CTGCCATTTAT	1
CTGCCTATAAC	1
CTGGCAAATGT	1
CTGCCTATGGC	1
CTGGCAACAAA	1
CTGGCCTATCT	1
CTGGCAACACT	1
CTGCCTCATAA	1
CTGGCAACTCT	1
CTGGCGAAGGC	1
CTGCCATTTCT	1
CTGGCGACCGA	1
CTGCCCAAAAA	1
CTGGCGTAAGT	1
CTGAGCTTACG	1
CTGCCTCGGCT	1
CTGCAAATAAG	1
CTGCCAATCTG	1
CTGCATTTCGC	1
CTGCCAATGCC	1
CTGGCACAGAC	1
CTGGCTGTACA	1
CTGCCCATAAG	1
CTGGCTTACGG	1
CTGCAACTAGG	1
CTGCCTTAAGA	1
CTGGCAGATCC	1
CTGCCACATGT	1
CTGGCAGCGGG	1
CTGCCCGTGTA	1
ACGTCTATTTG	1
CTGACGAATTT	1
ATTACTTAAAA	1
CTGAAAAAACA	1
CTCACCAAAAA	1
CTGACAACACA	1
CTCACTTAAAA	1
CTGAAAAACAC	1
CTGACCTTCTG	1
CTGAAAACAAA	1
CTGACGGAGTT	1
CTGAAAAGAAA	1
CGGGCAAAAGC	1
CTGAAAATAAA	1
CGGTCCAAACG	1
CTGACAACTAA	1
CTCTACAAAAT	1
CTGAAACACAC	1
CTGACCGAACA	1
CTGACAAGAAG	1
CTGACGAACAC	1
CTGAAATAAAA	1
CTACCCAAATT	1
CAGACTGAAAA	1
CAGCGCACGCG	1
ATGCCAGTTAT	1
CGGCCAGTTAT	1
CTGACAAGCTG	1
CTGACCAAATC	1
CTGACAAGGAA	1
CAGTCAAATAA	1
CTGACAAGGGC	1
CTAAACAAAAA	1
CAGACAAAACC	1
CTGACAAAAGT	1
CAGACAAGAAA	1
CTGACCATACA	1
CTGACAATACC	1
CTGACCCTGAT	1
ACGAGAAATTT	1
CACACTTAAAA	1
CAGCACAAAAG	1
CTGACGAAAAG	1
CTCACACAAAA	1
CTGACGAATGG	1
CTGACGTAAGC	1
CAGAACAAAAT	1
CCGCCTCATCA	1
CTACCTCATCA	1
AAGAACAAAAT	1
CCGACAAAACC	1
CAGCCAATAAG	1
CAGGCAAGTTC	1
CCGCCTTAAGG	1
CGGCACAAAAG	1
CTGAACAATTT	1
CTGACCAAACT	1
CTGACAGAAAT	1
ATGTCATATCT	1
CTGACAGAACC	1
AAGACAAAGAT	1
CTGACAGAATA	1
CGGTATATAAT	1
CTGAACTAATA	1
CTCACCAAACA	1
CTGACAGGAAA	1
CGGTCCAAATT	1
CTGACAGGAAT	1
CTAAACAAACA	1
ATGTAAAAAAT	1
ATGCAAGTTAT	1
CTGACAGTCCG	1
CAGTCATCCGC	1
CAGCCCTTTCG	1
ATGACAAAACT	1
CCGTCAAGACA	1
ATTACCAAAAA	1
ACTAATTAAAA	1
CTGACAAACAT	1
ATGTACAAAAG	1
ATTTACAAAAT	1
CTGACATAAAC	1
CTGACCGGGGC	1
CTGACATAAGT	1
CAGTCTATAAC	1
CTGACATACAC	1
CTGACAAAGAT	1
CTGACATACGG	1
CTCTCCAAACG	1
CTGAATCTATC	1
CTGACAAAGGA	1
ATGAACAAAAA	1
CTGACGAATGT	1
CTGACATCAAA	1
CATACATAAAA	1
CTCACATAAAA	1
CTGACGAGGGG	1
CTGACATTAGG	1
CTGACGATGGG	1
CTGACATTTCT	1
CAGACAAAAAC	1
CAGCCTTAAGG	1
CTGACAAATCG	1
ATGTCAAATCC	1
ACGACAACTTC	1
CTAGCATCACT	1
CTGACAATTTC	1
CTGACGTTCCT	1
CTGAACAATAG	1
CTGAACAATGG	1

## Sheet: AsuCas9 PAM_counts
7mer	counts number
CTGTCTATTTG	86228
CTGCCAATTGT	54555
CTGACCTTATC	25311
CTGGCACTCTA	24152
CTGTCTTTATT	21808
CTGTCTGTACT	20587
CTGGCTATAAC	19971
CTGACTTTCAG	18021
CTGTCTATGAA	16388
CTGTCTATTTT	15954
CTGGCCTTAAA	15354
CTGTCAGTTTG	14610
CTGGCCATGGT	11813
CTGACTTTTTT	11622
CTGCCAGTACA	11240
CTGCCTTTGTA	10594
CTGACGATTGG	10034
CTGCCAACGAT	8271
CTGTCTATTCC	8241
CTGCCTTTTCT	7733
CTGGCAATCGC	7678
CTGTCTTGTTT	6604
CTGTCGAAGAT	6076
CTGTCAATGTA	6023
CTGACGATTCA	6008
CTGGCTGTACA	5939
CTGGCTATCGG	5455
CTGCCTGGAAC	5411
CTGACTTTATC	5399
CTGACAAGAGA	5058
CTGACAACTTC	4690
CTGTCGTTACC	4361
CTGGCTCTATA	4345
CTGCCTATGGC	4162
CTGACGAGGCT	4118
CTGGCATACCC	4022
CTGGTCAATCC	3987
CTGGCCATACA	3931
CTGACAATATA	3852
CTGGCAATACA	3832
CTGTCACTCCC	3721
CTGTCAGGCGT	3673
CTGTCTATAAC	3664
CTGACAATTTC	3463
CTGGCAGTCTT	3422
CTGGCAAGTTC	3302
CTGACAGGAGG	3133
CTGACACTATT	3033
CTGTCTATGGT	2818
CTGGCCATTTC	2766
CTGACAAGAGC	2752
CTGGCATTCTC	2744
CTGACAATCGG	2691
CTGACAGTTCG	2609
CTGACTACCTA	2445
CTGTCTACAAA	2285
CTGTCTATACG	2238
CTGACAAGAAA	2175
CTGACTTAAAA	2153
CTGGGAATTTT	2105
CTGTCAATTGC	1633
CTGCCTTGTTG	1559
CTGTCCATACA	1549
CTGCCATAGGG	1532
CTGTCAGAACT	1476
CTGTCTCTGGC	1427
CTGACAAAAAA	1335
CTGTCTTTGTT	1272
CTGATCTATCC	1259
CTGTCAATAGC	1255
CTGACTGCACT	1210
CTGTCAGTACT	1043
CTGACAAACTT	1021
CTGACAACGCG	627
CTGCCGATCCT	493
CTGGCCCAATG	116
CTGCCAAAGCC	105
CCGCCAATTGT	78
CTGTCTATCTG	63
CTGTCTGTATT	61
CTGTCATATCG	48
ATGTCTATTTG	46
CTGTCTATTCG	37
CTATCTATTTG	36
CTGTCCCAATG	34
CGGTCTATTTG	32
CCGTCTATTTG	31
CTGACCCAATG	30
CTACCAATTGT	29
CTGTCAATTGT	27
CTGCAAAAAAT	27
CTGCCAATTGC	26
CTGACAATTGT	26
CTGAGAAATGT	25
CTGAGATAATT	25
CTGTATATTTG	24
CTGCCAATTTT	24
CTGCGCACGCG	23
CTGCCAATCGT	23
CTGTTACATTA	22
CTGTCTGTTTG	21
CTGTCTATTTA	21
CTGTGAAACGG	21
CTTTCTATTTG	20
CTGTTTATTTG	19
CTGTCTATACT	19
CTGCCAATAGT	19
ATGCCAATTGT	19
CTGCAAATTGT	18
CTGACATTATC	18
CTGTCCATTTG	17
CTGCCTATTTG	17
CTGTCTCTTTG	16
CTGTCTTTACT	16
CTGGGTTTATT	16
CTGGCCTTATC	16
CTGCATTCTCC	16
CTGCCAATTAT	16
CTGCATTTTGG	16
CTGACACTCTA	16
CTGTCTATTAG	15
CTGTACAAAAA	15
CTGTCTATTGT	14
CTGGTTATAAC	14
CTGTCGTTAAC	14
CTGACTTTTCT	14
CTGATGTCCGT	14
ATGTCAGTTTG	14
CTCCCAATTGT	14
CTGTCTATTTC	13
CTGCCGATTGT	13
CTGCCAATTGA	13
CTGTCTATATG	12
CTGTCTATAAA	12
CTGTCTATTCT	12
CTGTCTTTATC	12
CTGTATATAAT	12
CTGGCGACCGA	12
CTGGCTATAAT	12
CTGCTAATTGT	12
CTGGCACTCTG	12
CTGAGCAAGCC	12
CTGCACGTGAT	12
ATGACTTTCAG	12
CCGTCTGTACT	12
ATGTCTATGAA	12
CTGTCTTCCAA	11
CTGTGTTTATT	11
CTGTCCAAACG	11
CTGGTACTCTA	11
CTGGATTTTCA	11
CTGCCGAATTT	11
CTGACCAAGCT	11
CTGACTATTTG	11
CTGAAAAGTGT	11
CTGACCAAAAA	11
CAGTCTATTTG	11
ATGTCTATTTT	11
ATGTCTTTATT	11
CCGACCTTATC	11
CTTCCAATTGT	10
CTGTCTATGAC	10
CTGTCTCTATT	10
CTGTCTGTACA	10
CTGTCACTCTA	10
CTGTACAAAAT	10
CTGTAGGGGAG	10
CTGTCGCAACT	10
CTGACTTTATT	10
CTGATTTTCAG	10
CTGCCAGTATA	10
CTGCCTGTGTA	10
CTGACTTTCAT	10
CTGACTTTTAG	10
CTGACCTTATA	10
CTGACTATGAA	10
ATGGCCTTAAA	10
CAGCCAATTGT	10
ATGACGATTGG	10
CTGTCTATTAT	9
CTGTCTCCAAC	9
CTGTCTATATT	9
CTGTCAATTTG	9
CTGTCCATGGT	9
CTGTATGTACT	9
CTGTCCATGAA	9
CTGGATATAAC	9
CTGGACATGGT	9
CTGCCTGGACC	9
CTGAGGTTAAC	9
CTGCACCAGGC	9
CTGCCTTACTA	9
CTGAACGTTCG	9
CTGACCAAGCA	9
CTGACGTAGCT	9
CTGACCTTATT	9
CTGAACAATTG	9
ATGACCTTATC	9
CTGTCTATTAA	8
CTGTCTACTTT	8
CTGTCTACTTG	8
CTGTCAGTTTA	8
CTGGGAACCCG	8
CTGGTAATCGC	8
CTGTCCTTAAA	8
CTGGCTATTTG	8
CTGCCTTTATA	8
CTGGCCAGGGT	8
CTGGCCATGAT	8
CTGGAACTCTA	8
CTGGCATTAAA	8
CTGCCCTTTCT	8
CTGCATTTAGT	8
CTGCCCTCATC	8
CTGCAACAGTT	8
CTGCCAACTGT	8
CTGACCCTATC	8
CTGTCTATTCA	7
CTGTCTATGTG	7
CTGTCTTTTTT	7
CTGTCTGGCCT	7
CTGTTTATGAA	7
CTGTCTAGTTG	7
CTGTCTCATCC	7
CTGTCTGTACC	7
TTGTCTATTTG	7
CTGTAGAGAAA	7
CTGGCTTTTCA	7
CTGTCAATATC	7
CTGTCGACCGA	7
CTGGCGAAGTT	7
CTGCTAGTACA	7
CTGGCTATGAC	7
CTGGACAAGTC	7
CTGGCCATGTT	7
CTGGCAAAAGC	7
CTGGCACAGAC	7
CTGGCTCATCC	7
CTGCCTATTGT	7
CTGACTTCCAG	7
CTGCCAAGTGT	7
CTGCCATTTGT	7
CTGCATTTCTA	7
CTGCCCATTGT	7
CTGATGTGTGG	7
CTGCCCGGAAT	7
CTGCATTTGTA	7
CTGCCAAATGT	7
CTGACGATTGT	7
CTGACAGTTTG	7
CTGACTGTTTG	7
CTGACTATTTT	7
CTGACCTAATC	7
CTGACAATTGG	7
CCGTCTATGAA	7
CTATCTATTTT	7
CCGTCTATTTT	7
CCGTCTATTCC	7
ATGGCCATGGT	7
CCGACTTTCAG	7
CTGTCTATACA	6
CTGTGAACCCG	6
CTGTTTTTATT	6
CTGTGAATAAA	6
CTGTTGTTACA	6
CTGTGGTTTGT	6
CTGTCTTTATA	6
CTGTGTGCCGA	6
CTGTCTATGGA	6
CTGTCTATGTA	6
CTGTGTTTTTT	6
CTGTCTTTCAG	6
CTGGTCATGGT	6
CTGTATTTATT	6
CTGTATTGTTT	6
CTGGTCAATCT	6
CTGTCAAAGAT	6
CTGTATATTTT	6
CTGTACCCCTT	6
CTGGCTGTATA	6
CTGGCCAATCC	6
CTGGCTATACA	6
CTGCCTTTTAT	6
CTGCCTTTTCA	6
CTGGCACTCCA	6
CTGGCATTGCT	6
CTGCCAATGAT	6
CTGCCAGTACG	6
CTGATCGTTGA	6
CTGCCATCTTC	6
CTGCCTGTAAC	6
CTGATGATTGG	6
CTGCCAGTTGT	6
CTGCCTCAGGA	6
CTGCCTTGTTT	6
CTGCCAAGTAT	6
CTGACAGAAAA	6
CTGACTATTGG	6
CTGACAACCAA	6
CTGACGATTCG	6
CTGACTCATCC	6
CTGACCTTAAC	6
CTGACAGAATA	6
CTGACTATAAC	6
CCGGCACTCTA	6
CTAGCTATAAC	6
CGGTCTTTATT	6
ATGTCGAAGAT	6
CTATCTATGAA	6
ATGTCTGTACT	6
CTATCTGTACT	6
ATGGCACTCTA	6
CTTCCAGTACA	5
CTGTCTGAACT	5
CTGTTGTGTTT	5
CTGTCTTTTCT	5
CTGTCTGCACT	5
CTGTGCAATGC	5
TTGCCAATTGT	5
CTTTCTATGAA	5
CTGTCATTTTG	5
CTGTCAGTCTT	5
CTGGTAAGTTC	5
CTGTCCAAATT	5
CTGTCCGTACT	5
CTGTCCAATGG	5
CTGTCCTTATC	5
CTGGTCTTAAA	5
CTGTCATAGTT	5
CTGGGAAACTA	5
CTGTAACGACC	5
CTGCGTGGAAT	5
CTGGCAATTGC	5
CTGGCTATAGC	5
CTGGCACTCTC	5
CTGGCCTCAAA	5
CTGGCATATCC	5
CTGGCACATTC	5
CTGGCCATAAC	5
CTGGCACTATA	5
CTGGCCATAGT	5
CTGGCCATTGT	5
CTGCCTTCGTA	5
CTGCCCTTGTA	5
CTGACTTTCGG	5
CTGAGGCGTAA	5
CTGCCCTTTCG	5
CTGACTTTCTT	5
CTGACTTTTTC	5
CTGCCTATGAA	5
CTGCCTGTACT	5
CTGACTTACAG	5
CTGAATTTAGT	5
CTGAAAATGAA	5
CTGACCATATC	5
CTGAAATATTG	5
CTGACGATCGG	5
CTGACCAAACA	5
CCGTCTTTATT	5
CTATCTATTCC	5
CCGGCAATCGC	5
CAGCCAACGAT	5
ATGGCTATAAC	5
CAGGCATTCTC	5
CTAACTTTCAG	5
CAGTCGAAGAT	5
CCGGCCATGGT	5
CTGTCTTTGTA	4
CTTTCAGTTTG	4
CTGTCTCTGAA	4
CTGTCTATTGG	4
CTTGCTGTACA	4
CTGTCTATGTT	4
CTGTCTGTGCT	4
CTGTCTGTAAT	4
TTGGCTATAAC	4
CTGTTAGTTTG	4
CTGTCTACGAA	4
CTGTCCCATGG	4
CTGTCATTTTT	4
CTGTCATTCTC	4
CTGTCGGGGAG	4
CTGTCGATTTG	4
CTGTCAGTTCG	4
CTGTCAATCGC	4
CTGTCAAAATC	4
CTGTCGGGCGT	4
CTGTAAGGCGT	4
CTGTCAGTACA	4
CTGGGTTTACT	4
CTGTCAATAAC	4
CTGTAAAATCC	4
CTGGTATACCC	4
CTGTCGGTTTG	4
CTGGCTATCTG	4
CTGGCAATATA	4
CTGGCGATTGG	4
CTGGCCATGGG	4
CTGGACTTAAA	4
CTGGCACTCGC	4
CTGGCAGTACA	4
CTGGCAATACG	4
CTGGCTATAAA	4
CTGGCCCTAAA	4
CTGGCAATCAC	4
CTGGCCGTCCT	4
CTGGCTATATA	4
CTGGCTCCAAC	4
CTGGCACCCTA	4
CTGGCCTTGAA	4
CTGGCAGTCAT	4
CTGCCTTTGTG	4
CTGGCATTTTC	4
CTGATACTATT	4
CTGAGTTGGGC	4
CTGCCATTTCT	4
CTGATTTCGTA	4
CTGCCTATGTA	4
CTGATTTTTTT	4
CTGCCTTGTCG	4
CTGCAAGTACA	4
CTGACTTTATA	4
CTGACTTACTA	4
CTGCCGGTACA	4
CTGACTTTAAG	4
CTGCCTCTGTA	4
CTGCCAATGGT	4
CTGCCTTAGTA	4
CTGCCAATTCT	4
CTGCCAGTAAA	4
CTGCCAGTGCA	4
CTGACAGTACA	4
CTGACTAAACT	4
CTGACATTCAG	4
CTGACCTCATC	4
CTGACTATTCA	4
CTGACAGAAAG	4
CTGACGATGGG	4
CTGACAAGTTC	4
CTGACGTATGC	4
CTGACAATAGA	4
CTGACAACTCC	4
CTGACGAAGGG	4
CTGACACGAAA	4
CTGACGAGTGG	4
CTGACGATTTG	4
CTAGTCAATCC	4
CTAACCTTATC	4
CGGTCTATTTT	4
CCGACTTTTTT	4
ATGACTTTTTT	4
CAGCCAGTACA	4
ACTACTATTCT	4
CAGACTTTTTT	4
CTAACAAGAAA	4
CCGGCCTTAAA	4
CTAACTTTATC	4
CCGTCAGAACT	4
CTAGCCATGGT	4
CAGACTTTATC	4
ATGACTTTATC	4
CAGGCCTTAAA	4
CAGACTTTCAG	4
CAGACGAGGCT	4
CTTGCATTCTC	3
CTGTCTTGATT	3
TTGACCTTATC	3
CTGTCTTTATG	3
CTTCCTGGAAC	3
CTGTCTATCGG	3
CTGTCTTGTTC	3
CTGTCGTTACT	3
CTGTTTGTACT	3
CTGTCTTTTTG	3
CTGTCTGGAAC	3
CTGTCTAATCC	3
CTTGCACTCTA	3
CTGTCTACTAT	3
CTTGCCTTAAA	3
CTGTTCCCGCG	3
CTTTCTGTACT	3
TTGTCTATTCC	3
TTGCCTTTGTA	3
CTGTCGTTATT	3
CTGTCTTCATT	3
CTGTCAGTTTT	3
CTGTCAAGTTC	3
CTGTCAACGAT	3
CTGTAACGTTT	3
CTGGTATTCTC	3
CTGTCACTGTA	3
CTGTCATACCC	3
CTGTAACTAAC	3
CTGTCATCCGC	3
CTGTCAGCTTG	3
CTGTCCCTGGC	3
CTGTCAGGAGT	3
CTGTCAAATCC	3
CTGGCTTTCAG	3
CTGTCCTTATT	3
CTGTCAGGCTT	3
CTGTCGAATAT	3
CTGTCAGGTTG	3
CTGTCAACGTA	3
CTGTCAAAAAG	3
CTGTCATTACC	3
CTGGGGAAGAA	3
CTGTCAATGTG	3
CTGTCAATTTC	3
CTGTCACATCT	3
CTGCTAACGAT	3
CTGGCACACTA	3
CTGGCAATTGT	3
CTGGCCATGGC	3
CTGGCCACGGT	3
CTGGCAATCGT	3
CTGGCATACCA	3
CTGGCAATCTA	3
CTGGCATCTAT	3
CTGGCCATTCC	3
CTGGCCAATAC	3
CTGGCAATCTC	3
CTGCCTTTGTT	3
CTGGCCCACTG	3
CTGGCTGTACT	3
CTGCCTTTATT	3
CTGCGTCAAAG	3
CTGGCCCTGGT	3
CTGGCGCTCTA	3
CTGGCAGTCCT	3
CTGGCATTCTA	3
CTGGCCTAAGG	3
CTGGCAATAGC	3
CTGGCAGTCTC	3
CTGCCTTTGTC	3
CTGGCCTCATC	3
CTGGCTATTTT	3
CTGGCCTGAAA	3
CTGGATTTACA	3
CTGGCCTTAAG	3
CTGGCTCTATG	3
CTGGCAGTTTT	3
CTGGCAATCGG	3
CTGGCGAAACA	3
CTGGCCACTTC	3
CTGCATTTGAC	3
CTGCCTATGGA	3
CTGCCCTTAAT	3
CTGCCAACTAT	3
CTGCCTGGAAT	3
CTGAGAACCCG	3
CTGCAAACGAT	3
CTGCCAATGTT	3
CTGAGTTGTCG	3
CTGATCTTATC	3
CTGATAATTTC	3
CTGCCACTTGT	3
CTGCCTGGAGC	3
CTGCCAGATGC	3
CTGCCCATACT	3
CTGCCAGGAAT	3
CTGAGTAATGT	3
CTGATGAGGCT	3
CTGATGATTCA	3
CTGACTTAGGT	3
CTGCCTATGAC	3
CTGCCAGTTTG	3
CTGATAAGAGC	3
CTGAGCTTACG	3
CTGCCTCATCC	3
CTGCCATAGTG	3
CTGACTTTGTA	3
CTGCCATTACT	3
CTGCCTTACCC	3
CTGCCATTGTA	3
CTGACTTTCCG	3
CTGACCTTCAG	3
CTGACTGGAAC	3
CTGACAACATC	3
CTGACAATAGC	3
CTGACGATTAA	3
CTGACAACGAT	3
CTGACGAAAAG	3
CTGACTTACAA	3
CTGACTCTCAG	3
CTGAACAAATT	3
CTGACTGTACT	3
CTGACCGTATC	3
CTGACTATGGC	3
CTGACAGATCG	3
CTCTCTATTTG	3
CTGACGAGACT	3
CTGACACTACT	3
CTGACAGGAGT	3
CTGACTCTATA	3
CTGACAAGTGT	3
CTGAACTTATC	3
CTGACTACCTC	3
CTGACTGGAGG	3
CTGAAACTAAC	3
CTGACCGGAGG	3
CTGACTATCAG	3
CTGACCAAACT	3
CTGACATTCTC	3
ATGTCTTGTTT	3
CCGCCAACGAT	3
CAGCCTGGAAC	3
CAGCCTTTGTA	3
CTACCAGTACA	3
ACGGCTATTCT	3
CTATCCATACA	3
CCGGCTATCGG	3
CTAACGATTCA	3
CAGTCTTTATT	3
CTAACTTTTTT	3
ATGGCAAGTTC	3
CTAGCACTCTA	3
ATGTCACTCCC	3
CTATCAATGTA	3
ATGGCATACCC	3
ATGTCGTTACC	3
ACGTCATTCGT	3
CTAACGAGGCT	3
CTATCTTTATT	3
CTAACGATTGG	3
CCGTCTCTGGC	3
ATGCCAACGAT	3
ATGCCAGTACA	3
ATGCCTTTGTA	3
CCGACGATTGG	3
CTACCTTTTCT	3
CGGCCAATTGT	3
CCGCCAGTACA	3
CGGTCTATTCC	3
ATGGCAGTCTT	3
ATGCCTGGAAC	3
CTATCAGTTTG	3
CCGACTTTATC	3
CAGGCTATAAC	3
ATGGCTGTACA	3
CCGGCATTCTC	3
CAGGCCATTTC	3
CCGTCAGTACT	3
ATGACAGGAGG	3
CCGCCTTTGTA	3
CCGACAAGAGA	3
CTGTCTTGTTG	2
CTGTCTTTGGT	2
CTGTCTTTAAT	2
CTGTCTGTTCT	2
CTGTCTTGGTG	2
CTGTCTTAAAA	2
CTTTCTTTATT	2
CTGTTCAAAAT	2
CTTGCAATCGC	2
CTGTCGTTGGC	2
CTGTCTATGAG	2
CTGTTCGAATC	2
CTTTCGTTACC	2
CTGTTCTTAAA	2
CTGTCTCTACT	2
CTGTCTTACTA	2
CTGTGTTTATC	2
CTGTCTAATTG	2
CTGTCTGTTCC	2
TTGGCAATCGC	2
CTGTCTATTAC	2
CTGTCTGTCCG	2
CTTGCCATGGT	2
CTGTCTACCAA	2
CTTGCTATAAC	2
CTGTCTAAGAA	2
CTGTGTATTTG	2
TTGTCTTTATT	2
CTTTCTATAAC	2
CTTACAAGAAA	2
CTGTCGTTTCC	2
CTTACCTTATC	2
CTTTCTTGTTT	2
CTTACTTTTTT	2
GCGGCCATCGG	2
CTTCCAACGAT	2
TTGACTTTTTT	2
CTGTCGTTACA	2
CTGTCTATGGC	2
CTGTCTTGGCG	2
CTGTCTATCCC	2
CTGTCTAAACG	2
CTGTTTATTCC	2
CTGTCTTTAGT	2
CTGTGCGATAC	2
CTGGGTGCAAA	2
CTGTCGAAGAC	2
CTGGCTTAAAA	2
CTGTCAGTCGT	2
CTGTCGATGTA	2
CTGGTACGTCT	2
CTGTATATTCC	2
CTGTCAGTGGA	2
CTGGTCGATCC	2
CTGTCAGTGGC	2
CTGTCGACCGT	2
CTGTCAGTGTG	2
CTGGGACTTTT	2
CTGGGCGATAC	2
CTGGTCATACA	2
CTGTCAACTGC	2
CTGTCACTCCA	2
CTGGCTTTGGC	2
CTGTCCTAGAC	2
CTGTCAACTTC	2
CTGTCAGAAGA	2
CTGTAAGAACT	2
CTGGTGTCCGT	2
CTGTCATAGGG	2
CTGTCGAGGAT	2
CTGGTACTGCG	2
CTGGTAACACA	2
CTGTCAATACA	2
CTGGGCAACGT	2
CTGTAATACCT	2
CTGTCCATGTA	2
CTGTCATGTTT	2
CTGTCCATTTT	2
CTGGGCTTACG	2
CTGTCCCACTG	2
CTGTCATTATT	2
CTGGCTTTAAC	2
CTGTCATTCGT	2
CTGTCCGTCCT	2
CTGGGAATTCT	2
CTGTCCTATTC	2
CTGTCATTGTA	2
CTGGGACTACG	2
CTGTCAATGAA	2
CTGTCGAAGAA	2
CTGTCAATGCA	2
CTGTCAGCCGG	2
CTGGCTTTAAA	2
CTGGTTAATCC	2
CTGGTCAATCA	2
CTGTCGAGAAA	2
CTGTCCAACGA	2
CTGTCGATCCT	2
CTGTCCAACTT	2
CTGTCAGGCGC	2
CTGTACTTACC	2
CTGTCGCTACC	2
CTGTCCATAAC	2
CTGTAAATGAA	2
CTGTCGTCCGT	2
CTGTCAACCAG	2
CTGGCTTACGT	2
CTGTCAATTCC	2
CTGGCGATACA	2
CTGGATATCAC	2
CTGGACGTAAA	2
CTGGCACTCTT	2
CTGGCCTTAGA	2
CTGGATTGGTG	2
CTGGCTACAAC	2
CTGGATTTAGA	2
CTGGCTATGGT	2
CTGGCATACAC	2
CTGGATATCGG	2
CTGCCTTTTTA	2
CTGGCCTTCAA	2
CTGGCATACTC	2
CTGGCGGTCTT	2
CTGGCATCACC	2
CTGGACCTAAG	2
CTGGCAAAAGT	2
CTGCGTTCTGT	2
CTGCCTTTTTT	2
CTGGCTCAATG	2
CTGGCATTCTT	2
CTGGCTCTAAC	2
CTGGCATTGTA	2
CTGGCTGTAAC	2
CTGGCATTTCA	2
CTGCGTATTTT	2
CTGGCAAATGT	2
CTGGCGAACGT	2
CTGGCCAAGGT	2
CTGGCGCACGG	2
CTGGCAACACA	2
CTGGCGTACGA	2
CTGGCCATAAA	2
CTGGCTACCAG	2
CTGGCCATACG	2
CTGGCACAATG	2
CTGGCCATCGT	2
CTGGCTATCGA	2
CTGGAACTAAC	2
CTGGCTATCGT	2
CTGCCTTTGAA	2
CTGGCTATTGG	2
CTGGCCGACCT	2
CTGCTCCCAGT	2
CTGGCCTAAAA	2
CTGGCTCCATA	2
CTGGACAATTG	2
CTGGCACTCGA	2
CTGGCCTTAAC	2
CTGGCTGTAAA	2
CTGGACATACA	2
CTGGCCTTACA	2
CTGGCCTACTT	2
CTGCCAACGAG	2
CTGCCTTGAAC	2
CTGCCTGGATC	2
CTGACTTTTTG	2
CTGACTTTCTG	2
CTGCCAAGTTC	2
CTGCCTGGAAA	2
CTGACTTTCAC	2
CTGCCTTAAGG	2
CTGCCAAACAA	2
CTGCCAGAACT	2
CTGCCATCGAT	2
CTGCCAGACAC	2
CTGCCAATGCC	2
CTGCATTGTTG	2
CTGCCAATGGC	2
CTGACTTCATC	2
CTGACTTATAA	2
CTGATCATAGG	2
CTGCATTTTCT	2
CTGCCTTAGGC	2
CTGCCCAAGCT	2
CTGATCTATCA	2
CTGCCCACGAT	2
CTGATAAGAGA	2
CTGACTTTTTA	2
CTGCCTATGTC	2
CTGCCCGGAAC	2
CTGCCTATTTT	2
CTGCCAACAAT	2
CTGCCAGCACA	2
CTGAGAATTTC	2
CTGCCTCTTCT	2
CTGCCAATTGG	2
CTGACTTTCAA	2
CTGAGTTCAGC	2
CTGCCAGTACT	2
CTGCCACATGT	2
CTGATCAATCC	2
CTGCCACTCCC	2
CTGCCTGTTCT	2
CTGAGTTTTAC	2
CTGAGCATACG	2
CTGCACAAAAG	2
CTGACTTCACT	2
CTGCCTACTTG	2
CTGCCTTGGTA	2
CTGATAACTTC	2
CTGCCAACGAC	2
CTGAGGATTGG	2
CTGCCAGTTAT	2
CTGACGTTGAG	2
CTGACAACTTA	2
CTGACAAGATC	2
CTGACAGCGAT	2
CTGACCTTAAT	2
CTGACAGCTCG	2
CTGACATTTTT	2
CTGACCTTGTC	2
CTGACACGAGC	2
CTGACAGGAGA	2
CTGAATTTCAG	2
CTGACAATATC	2
CTGACGTTACC	2
CTGACGAATCA	2
CTGACTACACT	2
CTGACGACTGG	2
CTGACAAGATA	2
CTGACGAGAAA	2
CTGACACGAGA	2
CTGACAATCGC	2
CTGAAGATATC	2
CTGACGAGGCC	2
CTGACTCTTCT	2
CTGACAACAAA	2
CTGACTGGCCT	2
CTGACAGTATA	2
CTGACAAATAC	2
CTGACAGTCCG	2
CTGACGTTATC	2
CTGACGATGCT	2
CTGACATTTCT	2
CTGACAATCGT	2
CTGACTACATA	2
CTGACAATCTG	2
CTGACAAGAGG	2
CTGACAATGTA	2
CTGACTATATC	2
CTGACATCATA	2
CTGACAAGGGA	2
CTGACGATTGA	2
CTGACCAAGTA	2
CTGACATCGGC	2
CTGACCATGGT	2
CTGACAATGTC	2
CTGACACTATA	2
CTGACAATTCA	2
CTGACAATAAA	2
CTGACGGAGTT	2
CTGACAATACA	2
CTGACGGGTGT	2
CTGACCTGATC	2
CTGACGGTTCA	2
CTGACAGAACT	2
CTGACGTAACA	2
CTGACAACCTC	2
CTGACTTAAAG	2
CTGACATTTCG	2
CTGACTTAATA	2
CCGACAAACTT	2
ATGACAAGAGA	2
CAGACAGGAGG	2
CCGTCAATTGC	2
CCGGCAGTCTT	2
CAGGCATACCC	2
CTAACTGCACT	2
ATGCCTTTTCT	2
ACCTCTATTTG	2
CCGTCGAAGAT	2
CTATCACTCCC	2
ATGTCTATGGT	2
CAGGCACTCTA	2
ATGTCTATTCC	2
CCGACAATATA	2
ACGTCATTCTA	2
CAGACAATTTC	2
CAGGTCAATCC	2
ACTACAAGAAA	2
CAGTCACTCCC	2
ATGACAAGAAA	2
CAGTCAGTTTG	2
ATGACAAGAGC	2
CCGTCTTGTTT	2
ATGACAATATA	2
ATGACGATTCA	2
CAGCCTTGTTG	2
CAGTCGTTACC	2
CCGTCAATGTA	2
CGGGGAATTTT	2
ATGGCCATACA	2
CGGTCAGTTTG	2
CCGACAATTTC	2
CGGTCTATGAA	2
CAGACAAGAGC	2
CGGTCTATGGT	2
CCGACTACCTA	2
CAGTCTATGAA	2
CAGACAGTTCG	2
ACGTCTGTACT	2
CTAGCAATCGC	2
CAGTCTATTTT	2
CTAGCAGTCTT	2
CGGTCTGTACT	2
CTAGCCTTAAA	2
ATGACTTAAAA	2
CCGCCATAGGG	2
CTAACAAAAAA	2
CTATCAATTGC	2
CTAACAACTTC	2
CCGGCAATACA	2
CCGACAAAAAA	2
ACGACAAGAAA	2
CTAACAAGAGA	2
ATGACAGTTCG	2
CTAACAATATA	2
ATGTCTATAAC	2
CTAACAATCGG	2
CTCACAACTTC	2
CTAACAATTTC	2
CTAACACTATT	2
CAGTCTTGTTT	2
CTGTGAGTTTG	1
CTGTCTAGCGT	1
GTGTCTGTACT	1
CTGTCTTCGTC	1
CTGTGTTCTGT	1
CTGTCGTTGAG	1
CTGTCTACGTT	1
CTGTGTTTCCC	1
CTGTGCTATGC	1
CTGTCGTTGCC	1
TTGTCAATGTA	1
CTGTTAATGTA	1
CTGTCTATAAG	1
CTGTCTGCAAA	1
CTGTCTTATCA	1
CTGTTACATTT	1
GTGGCTATCGG	1
CTGTTAGGCGT	1
TTGACAAGAGA	1
CTGTCTTGTCT	1
TTGCCAACGAT	1
CTGTCTTGTTA	1
TTGGCCATGGT	1
CTGTTCAATCC	1
TTGTCTACAAA	1
CTGTTCAGAAA	1
CTGTCTTAATT	1
CTGTCGTTCTT	1
CTGTGAATTTT	1
CTGTCTACTCC	1
CTGTGATAATT	1
CTGTTCTAAGC	1
TTGTCTATTTT	1
CTGTCTACACG	1
GTGGCACTCTA	1
CTGTTGTCTGC	1
GTGTCTATGGT	1
CTGTCTTTAAA	1
TCGGTCCATGG	1
CTGTCTATGAT	1
TTGACAATATA	1
CTGTCTTTACC	1
TTGACTTTCAG	1
CTGTCTATGCG	1
TTGCCATAGGG	1
CTGTCTAGAAC	1
TTGGCAATACA	1
CTGTTTATTTT	1
TTGGGAATTTT	1
CTGTCTCGCAT	1
TTGTCAGGCGT	1
CTGTCTGTACG	1
TTGTCTATGAA	1
CTTACAACTTC	1
CTTGTCAATCC	1
CTGTCTAATTT	1
CTTTCGAAGAT	1
CTTACAAGAGC	1
CTTTCTAAGAT	1
CTTACAATATA	1
CTTTCTATACG	1
CTTACAATTTC	1
CTTTCTATGGT	1
CTTACATAGTG	1
CTTTCTATTTT	1
CTGTCTCGCGT	1
CTGTGCATACA	1
CTTACGATTGG	1
GCGGCCATAAG	1
CTTACTGCACT	1
GCGGCCTTAAA	1
CTTACTTTCAG	1
GTGGCCATGGT	1
CTGTCTCGTTT	1
GTGTATATTTT	1
CTTCATGGAAC	1
GTGTCTATTTG	1
CTTCATTCTCC	1
GTGTCTTTATT	1
CTGTCTTTCTT	1
TTGACAAGAAA	1
CTGTCTGTCTC	1
TTGACAAGAGC	1
CTGTCTCTAAT	1
TTGACAGTTCG	1
CTGTCTTTGTG	1
TTGACTTTATC	1
CTTCCTTGTTG	1
CTGTGGCGTAA	1
CTTCCTTTTCT	1
CTGTCTTATTT	1
CTTGAAGTCTT	1
TTGCCTGGAAC	1
CTTGCAAGTTC	1
TTGGCAAGTTC	1
CTGTCTACCGG	1
CTGTGTCTCCC	1
CTGTCTCTACA	1
CTGTCTCTGGT	1
CTGTCTAGCCT	1
TTGGTCAATCC	1
CTTGCCATACA	1
TTGTCACTCCC	1
CTGTCTACAAC	1
TTGTCGAAGAT	1
TTGTCTGTACT	1
TTGTCTATAAC	1
CTGTCTGTTTT	1
CTGTGTGTAAA	1
CTTGCTATCGG	1
CTGTGTTGGGC	1
CTGTCTAAAAA	1
CTGTGCTAACC	1
TTTACAGTTCG	1
CTGTGAAAGTT	1
CTGTGAACCCC	1
CTGTCCCGACA	1
CTGTCAGAACA	1
CTGTCACCCCC	1
CTGTATATGAA	1
CTGTCCATTCC	1
CTGTATATGGT	1
CTGTCCTAAGC	1
CTGGTCAGTCC	1
CTGTCACTCCT	1
CTGGGTGTAAA	1
CTGGGTAATGT	1
CTGGGTGTATT	1
CTGTCAATTAT	1
CTGGGTGTCCG	1
CTGTCCGGCGT	1
CTGTCAGTATG	1
CTGTCCTCATC	1
CTGTCAGTCCT	1
CTGTCACTAGC	1
CTGGTCTAAGT	1
CTGGTCAATAC	1
CTGTCAGTCTG	1
CTGTCAGATCG	1
CTGGGAATTTA	1
CTGTAGTTACC	1
CTGGCTTTCGG	1
CTGTCCATTTC	1
CTGTCAAAAGC	1
CTGTAAGTTTG	1
CTGGCTTCTTC	1
CTGGTCAAACT	1
CTGTCAAAGAA	1
CTGGTCAACCC	1
CTGTCAGTTGC	1
CTGTCCTATCG	1
CTGGCTGTGCA	1
CTGTCCTTACA	1
CTGTCAGTTTC	1
CTGTCGAAAAG	1
CTGTCAAAGCC	1
CTGTCGAAGTC	1
CTGTCAAAGTA	1
CTGTCACTCGC	1
CTGTCATAACT	1
CTGTCAGAAAT	1
CTGGTTATCGG	1
CTGTAGAAGAT	1
CTGGTTCTATA	1
CTGTCAGATTG	1
CTGGTTGTACA	1
CTGTCGTAGCT	1
CTGGTTTTAGA	1
CTGGGAACTTT	1
CTGTCATCAAA	1
CTGTCCATTCG	1
CTGTAAAAAAT	1
CTGTCAATTAA	1
CTGTCATCTTG	1
CTGTCGTTAAA	1
CTGTCATGCGT	1
CTGGGAATCGC	1
CTGGTAATACA	1
CTGTCCCTCCC	1
CTGTCAAGAGC	1
CTGTCCGAACT	1
CTGTAAAGTGT	1
CTGTCAATTTA	1
CTGTCATTCCA	1
CTGTCCGTTTG	1
CTGGGATTTTC	1
CTGTACAATTA	1
CTGTCATTCTA	1
CTGTCACAGAA	1
CTGTAAATTGC	1
CTGTCACATCG	1
CTGTCAATACG	1
CTGTACATACA	1
CTGTCATTGTT	1
CTGTCCTTCTT	1
CTGGCTTAGAC	1
CTGTCACTACA	1
CTGTCAATAGT	1
CTGTACATGGT	1
CTGTCCAAACA	1
CTGTACCAGGC	1
CTGTCAATATA	1
CTGTCGACCGG	1
CTGGCTTTATA	1
CTGGTCAAGCT	1
CTGGGCTTAAA	1
CTGTCGATACC	1
CTGTCAATCGG	1
CTGTCGATGAT	1
CTGTCCAAGCT	1
CTGTCGATTCC	1
CTGTAACTCAC	1
CTGGGGCGTAA	1
CTGTCCACTGG	1
CTGTCGCTCCC	1
CTGTAACTCCC	1
CTGTCAGCACT	1
CTGTCAATGGC	1
CTGTCGTAACC	1
CTGTCCATCAT	1
CTGTCGTATTT	1
CTGGTAGTCTT	1
CTGGCTTCGTC	1
CTGTCAATGTC	1
CTGGCTGTCTT	1
CTGTCAATTGA	1
CTGGCAACTCT	1
CTGGCTCTGTA	1
CTGGCAGTATT	1
CTGGCAAGTAC	1
CTGGCGTTCTC	1
CTGGCAAGTCC	1
CTGGCAAGAAA	1
CTGCGAATATG	1
CTGGCCATATC	1
CTGGCAAGTGT	1
CTGGATCTATA	1
CTGGCCATTAC	1
CTGGCAATTTC	1
CTGGCATATTG	1
CTGGCTATCAC	1
CTGGAACTATA	1
CTGCTCAATCC	1
CTGGCCATTTA	1
CTGGCACGCTA	1
CTGCGCACACG	1
CTGGCTCTACA	1
CTGGCCATTTT	1
CTGGCCATGCA	1
CTGGCACTTTA	1
CTGGCGTCCAC	1
CTGCCTTTGCT	1
CTGGCAACATC	1
CTGGAAGTATT	1
CTGGCTGTCAG	1
CTGGCCCTCTA	1
CTGGACGTTCG	1
CTGGAAGTCTT	1
CTGGCATACCT	1
CTGCTTTTGTA	1
CTGGACTAAAG	1
CTGGCCGTAAA	1
CTGGCTATGGG	1
CTGGCCGTACA	1
CTGGCTATTTC	1
CTGGAATTAAA	1
CTGGCAAGCTC	1
CTGGCCGTGGT	1
CTGGCTCTAAA	1
CTGGCCGTTTC	1
CTGGCTCTATC	1
CTGCCTTTTTG	1
CTGGCTGGAAC	1
CTGGCAATCCA	1
CTGCCTTTGCG	1
CTGCCTTTCCT	1
CTGGCAAAAAA	1
CTGGAATTCTC	1
CTGGCGTTAAA	1
CTGCTATTGTC	1
CTGGATGTACA	1
CTGGCATTCAC	1
CTGGCAACGAT	1
CTGCGGGACCA	1
CTGCGTTCAGC	1
CTGGCATTCCC	1
CTGGCTATACC	1
CTGGCATTCGC	1
CTGGCTATAGG	1
CTGGCCTTAAT	1
CTGGCTATATC	1
CTGGCAAACCC	1
CTGGCTATCCA	1
CTGGCAGTCGT	1
CTGGCTATCGC	1
CTGGCAGAGGT	1
CTGCGAACCCC	1
CTGGCAAAGAC	1
CTGGCTATGAA	1
CTGCTCAAGGT	1
CTGGCTATGGC	1
CTGGCGAAAAG	1
CTGGCCATACC	1
CTGGCAATGCA	1
CTGGCTATTGT	1
CTGCCTTTTGT	1
CTGCGTTTAAT	1
CTGGCAATGGC	1
CTGGCCATACT	1
CTGGCAATGGT	1
CTGGCCATATA	1
CTGGCGAGTTC	1
CTGGCTCGATA	1
CTGCTTTTTCT	1
CTGGCCATCCA	1
CTGGCGATCGG	1
CTGGAAAGTTC	1
CTGGCGATGGT	1
CTGCGAATAAT	1
CTGGCAATGTT	1
CTGGCTGCACA	1
CTGGCAGCGGG	1
CTGGCTGGCCT	1
CTGGCGCTCCC	1
CTGGCCATGCT	1
CTGGACATTTC	1
CTGCCTTTTCC	1
CTGGCGGTACA	1
CTGGCCATGGA	1
CTGGCCAAACT	1
CTGCGAAAAAT	1
CTGCCTCTGGT	1
CTGACTTTTAT	1
CTGACTTATCG	1
CTGCCAAGGAT	1
CTGATAATCGG	1
CTGCCATATGG	1
CTGCCAGCGAT	1
CTGACTTGTTT	1
CTGCCTTCTCT	1
CTGAGCTTATC	1
CTGACTTATTT	1
CTGAGAAAAAA	1
CTGCCTCGGCT	1
CTGCATATGGC	1
CTGATGGGTGT	1
CTGCCAATAAG	1
CTGAGATCATT	1
CTGCCTTTACT	1
CTGCCTTACTG	1
CTGCCCAAAGG	1
CTGAGCGTACC	1
CTGCATATTTG	1
CTGCCTATGGT	1
CTGCCAATCAG	1
CTGCCTATTGC	1
CTGCATGGAAC	1
CTGCCAAAAAA	1
CTGCCCATGGC	1
CTGCCTCTACA	1
CTGACTTTACT	1
CTGACTTTTGT	1
CTGCCCCAGGC	1
CTGCCAAATTA	1
CTGCCAATCTG	1
CTGCAATAGGG	1
CTGAGAAGAGA	1
CTGCCTGTTTG	1
CTGCCCGTACA	1
CTGCCTTACGA	1
CTGCCCGTGGA	1
CTGCCAACGCT	1
CTGCCCTACGA	1
CTGCCTTGGCC	1
CTGCCCTAGAG	1
CTGCACCGGAG	1
CTGCCCTAGTC	1
CTGACTTTACA	1
CTGACTTTGAG	1
CTGAGATACTT	1
CTGCCCTTAAA	1
CTGCCTATTCT	1
CTGCCAATGCT	1
CTGCCACTCAA	1
CTGAGTTATGG	1
CTGACTTTCTC	1
CTGCATTGCCG	1
CTGCCAGAACA	1
CTGATCTATTA	1
CTGCCTCGTTG	1
CTGCCCTTTGT	1
CTGCCTCTGGC	1
CTGCCAATGTA	1
CTGCAACTAGG	1
CTGAGTTTAAT	1
CTGCCTGAAAC	1
CTGCAAAATTC	1
CTGATACGTCT	1
CTGCCGCTGCT	1
CTGCCAGCGAG	1
CTGCCGCTGTC	1
CTGCAATACCT	1
CTGAGAATATA	1
CTGATCACAAT	1
CTGCCGTTACC	1
CTGACTTTACC	1
CTGCCGTTGTA	1
CTGCCTTAACT	1
CTGCCTAAGCC	1
CTGATCTTATT	1
CTGCCTACGGC	1
CTGATCCCGCT	1
CTGATTATAGT	1
CTGCCAGTCCA	1
CTGCCTAGAAC	1
CTGACTTAGAA	1
CTGCCTAGTTG	1
CTGCCAACGGT	1
CTGCCTATAAC	1
CTGCCAGTTCA	1
CTGCCTATAAG	1
CTGATCTATAC	1
CTGAGAATCGG	1
CTGACTTCAAA	1
CTGCAAATGTT	1
CTGCCAATACA	1
CTGACAGTGCC	1
CTGACAATCGA	1
CTGACTATATG	1
CTGACCATACA	1
CTGACAATTAC	1
CTGACAACCTT	1
CTGACTACCCA	1
CTGACAATTCG	1
CTGACTATTCC	1
CTGACCATTGG	1
CTGAAAACTTA	1
CTGACCATTTC	1
CTGACAAACCT	1
CTCGTCAATCC	1
CTGACAGTTCT	1
CTGAATATAAT	1
CTGACTACGTT	1
CTGACAATTTA	1
CTGACATTATA	1
CTGACAACGTC	1
CTGACTCAAAA	1
CTGACCGTTCG	1
CTGACATTTTC	1
CTGACAATTTT	1
CTGAACTAATA	1
CTGACACACTT	1
CTGACAGGTGG	1
CTGACAACTAC	1
CTGACAGTCGG	1
CTGACCTTAAA	1
CTGACAAAGAA	1
CTGAATCTATC	1
CTGACAAAGAC	1
CTGACAACTCG	1
CTGACAATAGG	1
CTGACCTTACC	1
CTGACTATACG	1
CTGAATTAAAA	1
CTGACTATCGG	1
CTGAATTGGTG	1
CTGACTATGTA	1
CTGAATTGTGC	1
CTGACATTCAT	1
CTGACACTCCC	1
CTGACTCCGAC	1
CTGACACTCGG	1
CTGACTCTATT	1
CTGACCTTTTC	1
CTGACAACACG	1
CTGACCTTTTT	1
CTGACTGGCCG	1
CTGACAAGAAG	1
CTGACAACCGG	1
CTGACACTGTT	1
CTGACAGGATG	1
CTGACAAGACA	1
CTGACAAACAT	1
CTGACGAATGG	1
CTCTCAGTTTG	1
CTGAAAATATA	1
CTGACAGTCTT	1
CTCTCAATTGC	1
CTGACGTTCAG	1
CTGACAGAAGA	1
CTGACGTTTGG	1
CTGACGAGAGA	1
CTGACTAACTA	1
CTGACGAGAGC	1
CTGACATAAAC	1
CTGAATTTTGG	1
CTGACTTAAGA	1
CTGACAAGAGT	1
CTGACTACCTT	1
CTGACGAGGTT	1
CTGACATAGTG	1
CTGACGAGTCT	1
CTGACAAAGGA	1
CTGACAGCACT	1
CTCGCCATTTC	1
CTGACGATACA	1
CTGACATGAGG	1
CTGACAGCCGT	1
CTGACTATGGT	1
CTCTCACTCCC	1
CTGACAATATG	1
CTGACAAAACA	1
CTGACAATATT	1
CTGACAGCTTC	1
CTGACATTCGG	1
CTGACGATTAG	1
CTGACAATCCG	1
CTGACAGGAAA	1
CTGACTCTACA	1
CTGACAGGAAT	1
CTGACTCTATC	1
CTGACAAAACC	1
CTCTCTTTATT	1
CTGACAGGAGC	1
CTGACTGCAAT	1
CTGACAAGGGC	1
CTGACTGCATT	1
CTGACGATTTA	1
CTGACCAAAAC	1
CTGACGATTTC	1
CTGACAATCTA	1
CTGACAAACAC	1
CTGACTGTGAT	1
CTGACGCATGG	1
CTGAAAAGAGA	1
CTGACGCTATT	1
CTGACCACCTA	1
CTGACGCTTGG	1
CTGACATACCC	1
CTCCCTTTGTA	1
CTGACATAGGG	1
ATGTCTATTAA	1
CCGCCTTTTCT	1
ACGGCATTTCA	1
CCGGCCATTTC	1
ACGTCTTTATT	1
CAGACTTAAAT	1
CTACCTTGTTG	1
CCGGCTATAAC	1
CTATCAGGCGT	1
ACGACAACTTC	1
CTCACGATTCA	1
CCGGGAATTTT	1
ATGTCTATACG	1
ATGACAGGATG	1
CCGACAGGAGG	1
ATGGCATTCTC	1
CCGACGATTCA	1
CCGTCACTCCC	1
ATTTCTATTTG	1
ATGGCATTCTT	1
CTATCGCAACT	1
CCGTCAGGCGT	1
ATGACAATCGG	1
ATGACAGTATG	1
ATGACACTATT	1
CCGTCAGTTTG	1
AAGCCAACGAT	1
AAGGCTATAAC	1
ACGACGATGGG	1
CCGTCGAAGGT	1
CTACCAACGAT	1
CCGTCGTTACC	1
CTACCTATGGC	1
CCGTCTACAAA	1
CTAGCAAGTTC	1
CCGTCTATAAC	1
ACGCGTATCTA	1
ACGACAATTGG	1
ATTCAAATTGT	1
ACGTCGAGAGG	1
CAGACAACTTC	1
ATGGCTATCGG	1
CCGCCTATGGC	1
CAGCCTTTTCT	1
CCGCCTGGAAC	1
CAGGCAATCGC	1
ATGGCAAAAGC	1
ATGGCTCTATA	1
CTCACACTCCC	1
CAGGCAGTCTT	1
CTCCAAATTGT	1
ACGTCGATTCA	1
ATGACTTGTTG	1
CCGTTTATGAA	1
CAGTCTGTACT	1
CGGACGATTGG	1
CTAACGAGTGG	1
CGGATGTGTGG	1
ACGACCATTCG	1
ATGGGAATTTT	1
CCGACAACTTC	1
CGGGCAATCGC	1
AGGACTTTTTT	1
CGGGCACTCTA	1
ATGTCTATTCG	1
CGGGCCATTTC	1
CTACCGATCCT	1
CAGGCCATGGT	1
CTACCTGGAAC	1
ATGGTCAAACT	1
CCGACAGTTCG	1
CGGTCGTTATT	1
ATGACAACTTC	1
ATGTCAATACA	1
ACGACTATATA	1
ATGTCAATGTA	1
ACGGAAATCCT	1
CGGTCTATTAT	1
CTAGCTATCGG	1
CAGGGAATTTT	1
CTATCAATAGC	1
CAGGGTTTATT	1
CAGAATTTATG	1
ATGTCAATTGC	1
CTATCAGAACT	1
CGGTCTCTGGC	1
ATGGATATAAC	1
CAGTCAATTGC	1
CTATCGAAGAT	1
ATGACGTAGCT	1
CTATCTATAAC	1
CGGTCTTTGTT	1
CAGACAATATA	1
ATGTCAGGCGT	1
CAGACAATCGG	1
CTAACAAACTT	1
CTATCTTGTTT	1
CAGTCCATACA	1
ATGGCAATCGC	1
ATGACTATAAC	1
CTCACCTTATC	1
ATGTCCATACA	1
CTCACGATTGG	1
CTAACAAGAGC	1
CAGACCTTATC	1
CAGTCTATACG	1
ACGACATTGCG	1

## Sheet: BdeCas9 PAM_counts
7mer	counts number
CTGGGTTTATT	67038
CTGAGATTGTG	33002
CTGGGACTGGG	25657
CTGTGATTGTT	25465
CTGTGTTTTTT	25131
CTGTGTTTCCG	21110
CTGGGATATGC	20493
CTGTGATTCAC	15223
CTGCGTCTCCA	12711
CTGGGACTCCG	12568
CTGGGCTTACG	11133
CTGGGTTTGCG	11029
CTGAGACTAAC	11011
CTGTGACTCTA	10189
CTGGGAGTGTC	10105
CTGAGATTAGT	9740
CTGTGACTCAC	9553
CTGGGACATTA	9381
CTGCGATTCCG	9197
CTGAGACTGGA	8174
CTGGGAGTAAG	7563
CTTGGACATTC	7358
CTGGGTTCATC	6710
CTGTGACTAAC	6488
CTGGGCTACGA	6197
CTGTGGTTTGT	6182
CTGAGAATTTT	6099
CTGCGGTTATC	5943
CTGTGTCAGCT	5488
CTGAGCTTTTC	4957
CTGTGACTCGC	4926
CTGAGATTGAT	4839
CTGAGATAATT	4590
CTGCGCTTTAC	4406
CTGCGATTGTT	4355
CTGCGATTACT	4343
CTGAGCCTAAA	4231
CTGTGACAGGG	4145
CTGTGACAGCG	3914
CTGCGCCTAAA	3888
CTGAGACTCGC	3846
CTGCGATTTCT	3709
CTGCGACGATC	3639
CTGCGTCTACA	3371
CTGGGTTGAAA	3328
CTGGGATTGCG	3208
CTGCGACTCCC	2881
CTGGGAGTAAA	2830
CTGAGTCCAAT	2819
CTGTGTCGAAG	2784
CTGAGTTTTGT	2746
CTGCGGCTGCG	2576
CTGAGATTTTT	2553
CTGTGTCTTAT	2466
CTGGGATTCTT	2445
CTGGGTTTGTT	2376
CTGCGTGGAAT	2332
CTGCGCTACAA	2111
CTGGGCTTAAG	2031
CTGGGTTTTGT	2024
CTGGGTCTATC	2003
CTGCGACTCGA	1932
CTGAGTTTACA	1923
CTGCGTTTTGG	1909
CTGGAATTTAT	1883
CTGGGTTTTAC	1777
CTGTGTTTATT	1698
CTGCGTTTTAT	1684
CTGCGATTTTC	1614
CTGAGTTTTAC	1590
CTGTGGTTAGC	1539
CTGCGCTTTAT	1521
CTGAGACTACC	1464
CTGGGTATATC	1291
CTGTGTATGTT	1281
CTGTGTTTTCC	1250
CTGTGCTTCTG	1225
CTGAGACTCCC	1176
CTGTGTCTGGA	1096
CTGCGCTTAAC	1093
CTGTGCTTAAC	1062
CTGTGCTGTTC	1047
CTGTGACTATT	1029
CTGCGTTTGGT	1021
CTGAGATTGCG	1018
CTGTGATTGTA	911
CTGGGATCCTG	886
CTGCTATTGTC	841
CTGGGTTTCGA	783
CTGCGCTTCGC	733
CTGTGACTATA	678
CTGTGCTCAAT	637
CGGAGATAATT	544
CTGTGTTTCTA	508
CTGGGACTCCT	486
CTGGGACTCTC	481
CTGTGATTATT	381
CTGCGTCTGTG	378
CTGTGATCATC	288
CTGTGTCTATA	240
CTGGGAATTTT	196
CGGAGATTGTG	181
CTGGGAAACTA	111
CGGAGATTAGT	109
CTGACCTTATC	97
CTGAGAAAAAA	86
CTGACTTAAAA	85
CTGTCTTTATT	79
CTGAGAAATTT	78
CAGCGTCTGTG	67
CTGTGAAATCT	60
CTGTCTGTACT	58
CTGTGAAAAAA	54
CTGGGAAAACA	53
CTGGCCCACTG	51
CTGCATTTTGG	50
CTGTGAAAGGA	49
ATGAGATTGTG	48
CTGCAAAAAAT	44
CTGCGTTAATA	43
CTGTGAAATCA	43
CTGAGAAAACA	42
CTGAGAAATTC	41
CTGAGAAAAAG	41
CTGGAAAAATC	40
CTGTGATATCA	40
CGGAGATTGAT	39
CTGCGCTAGTC	38
CTGGGTTTATC	37
CTGTGAAAAAC	37
CTGAGAAGTCC	36
CTGTGCTAGTT	35
CTGGCCTTAAA	34
CCGGGTTTATT	31
CTGCCTTTTTC	31
CTGTCTCTGGC	31
CTGGGAGACTA	30
CTGGACAATTG	29
CTGGGAATTCC	27
CTGGCCGTCCT	27
CTGTGAAACGG	27
CTGTGCCTTAC	27
CTGAGATTGTT	26
CTGGCCTCGGA	26
CTGTATTTATC	26
CTGCGGTCATC	25
CTGCCCTTTCG	24
CTGCCTCTATA	24
CTGAGGGTGCA	24
CTGGGTTTAAA	24
CTGGGTTTGTC	24
CTGTATATAAT	23
CTGCGCTTGTC	22
CTGTGATTCCG	22
CTGCGTTATTG	21
CTGCGTTTAGT	21
CTGGGTTCATT	21
CTGCAAAACCC	20
ATGGGTTTATT	19
CCGAGATTGTG	19
CTGACCCTGAT	19
CTGACTTTCGG	19
CTGGGTTTACT	19
ATGGGACTGGG	18
CTGACTCTGAT	18
CTGACTTTCAG	18
CTGGAATAAAC	18
CTGGGTTTATA	18
CTGGGTTTACA	18
CTGTGTTTTTC	18
ATGTGTTTTTT	17
CTGAAAAAAAT	17
CTGGGAAGATA	17
CTGGGATTGTG	17
CTGTATTGAAA	17
CTGTCCTTATT	17
CTGTGGTTTGC	17
CTGACCTTCTG	16
CTGAGAAACGC	16
CTGCCTGTATC	16
CTGGGAAAGTC	16
CTGCGTTTTTG	16
CTGAAAAAAAC	15
CTGCATTTGCT	15
CTGCGAATAAT	15
CTGGTTTTATT	15
CTGGGTTTAAT	15
CTGTGTCAATA	15
ATGTGTTTCCG	14
CTGACTTTGGC	14
CTGAGAAAACT	14
CTGCGAAAGTT	14
CTGCGCTATAC	14
CTGGCTTTGGC	14
CTGGCCGACCT	14
CTGGGCTTACA	14
CTGGGTTAGGT	14
CTGGGGGTGCA	14
CCGGGACTGGG	13
CTGGGATATAC	13
CTGTGATTGTC	13
CTGTCCTCGTT	13
CTGTGACATCC	13
CTGTGTTTTCT	13
CTGAGATTATG	12
CTGAGATCGTG	12
CTGCGCAAGAA	12
CTGAGTTATGG	12
CTGCGATACGA	12
CTGGCTCTTCC	12
CTGGCCTACTA	12
CTGGGATATGT	12
CTGTGATTCAT	12
CTGTCTTTGTT	12
CTGTGGAATTC	12
CTGTGGGTGCA	12
ATGAGATTAGT	11
CTGCATTTCTT	11
CTGAGGCTACC	11
CTGAGTTTATT	11
CTGCCTTTGCG	11
CTGGCCCGACA	11
CTGCGTTTAAT	11
CTGGATTTATT	11
CTGTCTGAACC	11
CTGTATTTTTT	11
CTGTGATACGT	11
CTGTGAAGTCT	11
CGGGGTTTATT	10
ATGGGACTCCG	10
CTAGGTTTATT	10
CTGAGACTGGG	10
CTGCCTCTGGT	10
CTGCGAGAAAT	10
CTGCCCGTGGG	10
CTGGCTTGGTT	10
CTGGCTTGGGA	10
CTGGGATTTTC	10
CTGGGACTGGA	10
CTGTCCTCAGC	10
CTGTAGAAAAC	10
CTGTCTTTACT	10
CTGTGCTATTA	10
CTGTCTTCCAA	10
CTGTGTTTCCA	10
CTGTGTCCCGA	10
CCGTGATTCAC	9
CCGTGATTGTT	9
CTGAGCCACAG	9
CTGACGTTAGT	9
CTATGATTGTT	9
CTGATATTGTG	9
CTGCCTCGCGA	9
CTGCGAATGCA	9
CTGCATTGACC	9
CTGGACAACAT	9
CTGGGAATACT	9
CTGGGACCGGG	9
CTGGGTTTAGT	9
CTGGGTTTTTC	9
CTGTGATTTTT	9
CTGTGACTGGG	9
CTGTCCGTTCG	9
CTGTGTTTAGT	9
CTGTGGTTGTT	9
ATGTGATTGTT	8
CGGTGGTTTGT	8
CCGCGTCTCCA	8
CTGAGATTCTC	8
CTGCCTTAGAA	8
CTGCGAAGAAT	8
CTGATATAAAA	8
CTGCCTTTGTC	8
CTGCGTTCTGT	8
CTGCGTGGACT	8
CTGGCTTTACT	8
CTGGGACTCAG	8
CTGCGTTTGCC	8
CTGCGTTTTTT	8
CTGGGAGGTTT	8
CTGGGTTTGAC	8
CTGGGTTTCTT	8
CTGGGTGTATT	8
CTGGGATATGA	8
CTGGGTGTAAA	8
CTGGGTATATT	8
CTGTCCTTATA	8
CTGTGATACAT	8
CTTGGTTTATT	8
CTGTGTCTCCA	8
CGGTGTTTCCG	7
CCGTGTTTTTT	7
CCGGGATATGC	7
CTGACCGCTTT	7
CTGAGAATCGC	7
CTGAGAGTGTC	7
CTGAAAAAGAG	7
CTGAGATTTTC	7
CTATGTTTTTT	7
CTGAGATTGTA	7
CTGCGACATTT	7
CTGCGCAATGG	7
CTGCATCTTCG	7
CTGCGCCGCGT	7
CTGCGCAAGAG	7
CTGCGATTCCA	7
CTGCCTTGTTG	7
CTGCATCTAAT	7
CTGGGACGGGG	7
CTGCGTCTGTT	7
CTGCGTCTCCG	7
CTGGCCTGACG	7
CTGGGACTAGG	7
CTGGAATATGC	7
CTGCGGAATAT	7
CTGGCGTTTTA	7
CTGCGTTTTCG	7
CTGGGTCTATT	7
CTGGTACATTA	7
CTGGGACTGGT	7
CTGGGTTTTTT	7
CTGGGTTAATT	7
CTGGGCTTATT	7
CTGTCCTCTTG	7
CTGTGACTCAT	7
CTGTGAATCAG	7
CTGTCTGCCGG	7
CTGTATTGACG	7
CTGTCGTTGGC	7
CTGTTTTTCCG	7
CTGTGTTTCAG	7
TTGGGTTTATT	7
CTGTGTCTATT	7
ATGGGCTTACG	6
ATGGGATATGC	6
CTAAGATTGTG	6
CCGAGACTGGA	6
CTGACCTTGTC	6
CTGAGATTTTG	6
CTGACTTGTGG	6
CTGAGAGTAAG	6
CTAAGTTTTGT	6
CTGCGATCCCG	6
CTGCAAAAGAG	6
CTGCCTGTAAG	6
CTGCGAGATGT	6
CTGATACTAAC	6
CTGCCTTGGCC	6
CTGAGTCAGCT	6
CTGCCTTCGCC	6
CTGCATTTAGT	6
CTGGGACTAAC	6
CTGGCCTAGGG	6
CTGGGACTCCA	6
CTGGGACATTG	6
CTGCGTTTTCT	6
CTGGGACATGC	6
CTGGGACTGTG	6
CTGGGACTCTG	6
CTGGGATATTC	6
CTGGGCTTATG	6
CTGGGATTCCG	6
CTGGGTTCGTT	6
CTGGTACTGGG	6
CTGGGATACGC	6
CTGGGACTGAG	6
CTGGGCTTGCG	6
CTGGGGTATGC	6
CTGGGATTGAT	6
CTGGGCTTACT	6
CTGTCCCGGCG	6
CTGTCCGTGTG	6
CTGTCCACTTA	6
CTGTGATTGTG	6
CTGTCCGACCC	6
CTGTGATTAGT	6
CTGTCCAGCTG	6
CTGTAATTGTT	6
CTGTGACAGAT	6
CTGTGAAATTA	6
CTGTCTGTTTG	6
CTGTGGCTCAC	6
CTGTGGCCAGT	6
CTGTTCTGCCC	6
CTGTTTTTTTT	6
CTGTGTTTGTT	6
CTGTGTCATGC	6
CTGTGTCTCCG	6
CTGTGTTTTGT	6
CGGTGATTGTT	5
CCGTGACTCTA	5
CGGAGATTGCG	5
CAGGGTTTATT	5
CCGAGACTAAC	5
CCGTGTTTCCG	5
CTGAGCTATCC	5
CTATGATTCAC	5
CTATGTCAGCT	5
CTGACTCTAAT	5
CTGACTTTGCA	5
CTGAGATTCAC	5
CTGAGAGTGTG	5
CTGAGAGAAAG	5
CTGAGATTGGT	5
CTGAGATATGC	5
CTGACTCTCTC	5
CTGACCCAAAG	5
CTGACTTTTTT	5
CTGATACTGGA	5
CTGATATAATT	5
CTGCAAATAAT	5
CTGCGATTGTC	5
CTGCGAGAATT	5
CTGCCATTGAG	5
CTGAGTCTCCA	5
CTGCGACTCCA	5
CTGCAAAATTC	5
CTGGGACACCC	5
CTGGCCGGCTT	5
CTGCGTCTAGA	5
CTGGCCTCAGC	5
CTGGCGTTAAT	5
CTGGCGTTAAA	5
CTGGCTTGACG	5
CTGGGAAGACG	5
CTGGACTTACG	5
CTGGGAATACG	5
CTGGGAAAGCA	5
CTGGCCTACTC	5
CTGCGTTAATT	5
CTGCGTCTCTA	5
CTGGCTTTGTG	5
CTGGGTTTGCA	5
CTGGGTTCGCG	5
CTGGGTTTGTG	5
CTGGGCTTGGT	5
CTGGGTTTGGT	5
CTGGGATGTGC	5
CTGGGAGTATC	5
CTGGTGGGGAG	5
CTGGTAGTGTC	5
CTGGGATATGG	5
CTGGGCGTAAA	5
CTGGGATACTG	5
CTGGTATATGC	5
CTGGGGCTCCG	5
CTGGGGCTGGG	5
CTGGTTTTGCG	5
CTGTAAAATCC	5
CTGTCTTTTCC	5
CTGTCCCCCCC	5
CTGTCCCTCCT	5
CTGTGACAGCT	5
CTGTCTCTGTT	5
CTGTGCCGCGT	5
CTGTGATTCGC	5
CTGTGACAGCA	5
CTGTGACAACG	5
CTGTGCCTAAA	5
CTGTCCATGGG	5
CTGTGATTGAT	5
CTGTCTATTTG	5
CTGTACAAAAA	5
CTGTATTTCCG	5
CTGTCCGGCCC	5
CTGTGAAACCA	5
CTGTACTTTCC	5
CTGTCTGTCCG	5
CTGTGCCACGC	5
CTGTGTTATTT	5
CTGTGTTTCCT	5
CTGTGTATGGA	5
CTTTGATTGTT	5
CTGTGCTTACG	5
CTTGGATATGC	5
CTGTGTCTTTT	5
CTTAGATTGTG	5
CTGTTATTGTT	5
CTGTGTTCCCG	5
ATGAGCCTAAA	4
CTAAGACTAAC	4
ATGGGACATTA	4
ATGTGACTAAC	4
CCGGGACTCCG	4
CGGAGAATTTT	4
CAGTGTTTTTT	4
CCGGGTTTGCG	4
CCGGGAGTGTC	4
CCGCGACTCCC	4
CTAGGATATGC	4
CTATGTTTCCG	4
CTGAGACTAGA	4
CTGAGAAGAGT	4
CTATGACTCAC	4
CTGAGATTATT	4
CTACGTTTTGG	4
CTGACTTGACT	4
CTCGGTTTATT	4
CTGAGACTGTG	4
CTGAGACCAAC	4
CTGACCTTAAG	4
CTGAGACACTG	4
CTGACCTCCTT	4
CTAGGACATTC	4
CTGACCAAAAC	4
CTGAGACTAGC	4
CTACGATTACT	4
CTGCATTTGCC	4
CTGATAATTTT	4
CTGCATTTGGT	4
CTGAGCTTCTC	4
CTGAGTTTGTG	4
CTGCGATTCCT	4
CTGAGCTTTTT	4
CTGAGTCAAAT	4
CTGCGACAGTC	4
CTGAGGCTAAC	4
CTGAGTTTTTA	4
CTGCGACTGCT	4
CTGCGACAATC	4
CTGCGACTAAC	4
CTGCGACTCCG	4
CTGCGATTGCT	4
CTGCGATTTTT	4
CTGAGGCCAGT	4
CTGCGATTTAT	4
CTGATGGAGTA	4
CTGAGCTTACG	4
CTGCGGCTGCT	4
CTGGCCTTACA	4
CTGGCTTTTTA	4
CTGGCCCTCTT	4
CTGGCTTCGTC	4
CTGCGTTTATA	4
CTGCGCTATCA	4
CTGCGTTATCG	4
CTGGCAGTACA	4
CTGCGTTATCC	4
CTGGATTTGCG	4
CTGGCCCCGTA	4
CTGCGTATCCA	4
CTGGGAAATTA	4
CTGGCTATAAC	4
CTGGGACTACG	4
CTGGCCCTTTG	4
CTGGCCATTGG	4
CTGCTCCTAAA	4
CTGGACCCTCG	4
CTGGGTTTCCG	4
CTGGGATTATT	4
CTGGTTTCATC	4
CTGGGTCTGCG	4
CTGGGCTACAA	4
CTGGGTTTATG	4
CTGGTACTCCG	4
CTGGGAGGCAG	4
CTGGGATTACG	4
CTGGGTTTACG	4
CTGTAAAAACT	4
CTGGGACTTGG	4
CTGGGAGTGTT	4
CTGGGCTTGAG	4
CTGTGAGTAAG	4
CTGTCTTTGAG	4
CTGTGACTCGT	4
CTGTCCTTTTA	4
CTGTCCCGACG	4
CTGTCCTTGGG	4
CTGTCCACATT	4
CTGTCCTGGAT	4
CTGTCCGCTCC	4
CTGTGAGTGTC	4
CTGTGATTCCA	4
CTGTCCTATTC	4
CTGTCCCCCTA	4
CTGTGATTTAC	4
CTGTGAGACTC	4
CTGTCCGTCCT	4
CTGTGATGGTT	4
CTGTCCGGGGA	4
CTGTCCGGGCC	4
CTGTGACTCCG	4
CTGTGTCATCT	4
CTGTGTCTTGA	4
CTTGGACTGGG	4
CTGTGTTTGCG	4
CTGTGTCGAAT	4
CTGTGTTTCTG	4
GTGGGTTTATT	4
CTTGGACATTA	4
CTGTGTTAGCT	4
CTGTTATTCAC	4
CCGTGACTCAC	3
ATGCGGTTATC	3
ATGGGAGTGTC	3
ACGAGATAATT	3
CAGTGACTCAC	3
CAGGGACTGGG	3
ATGGGATTCTT	3
CGGTGACTCAC	3
CATGGACATTC	3
CAGCGTCTCCA	3
ATGCGATTCCG	3
CAGAGTCCAAT	3
ATGGGTTTGCG	3
CAGAGATTGTG	3
AGGAGATTGTG	3
CAGAGACTGGA	3
CGGCGTCTACA	3
CGGGGTTTGCG	3
CTAAGCCTAAA	3
CCGGGACATTA	3
CGGTGTTTTTT	3
ATGTGTCGAAG	3
ATGCGCCTAAA	3
ATGTGTCAGCT	3
CAGTGATTGTT	3
CTAAGACTCGC	3
CCGTGTCAGCT	3
CCGTGACTCGC	3
CCGAGATTGAT	3
CTGAGACTGAC	3
CTATGACAGCG	3
CTGAGACTAAA	3
CTGAGACTCTC	3
CTAGGACTGGG	3
CTGAGATTTAT	3
CTATGTCTGGA	3
CTGAGATAGTG	3
CTGACTTGATC	3
CTGAGCAAAGT	3
CTGAGCCAAGG	3
CTGAGACTCGA	3
CTGAGATGATT	3
CTACGATTCCG	3
CTGAGACTTTT	3
CTGAGATCAGT	3
CTATGTCGAAG	3
CTGAGAAGGAA	3
CTGAGACCGGA	3
CTGAATGTAAA	3
CTGAGATTGAG	3
CTGAATAGACA	3
CTGACTTAAGC	3
CTGAGATTGCT	3
CTAGGAGTGTC	3
CTGAGATTAAT	3
CTAGGACTCCG	3
CTGAGATGGTG	3
CTGAGCCTAGA	3
CTCGGACATTC	3
CTGAGATTCCG	3
CTGAGCTACAC	3
CTGAGACTCAC	3
CTGACTTGTTA	3
CTGAGTTAACA	3
CTGCGACCTAC	3
CTGCGCCGATC	3
CTGATATTAGT	3
CTGAGCTTTCC	3
CTGCCCCCTTC	3
CTGAGTCCAAA	3
CTGCGCCTACA	3
CTGAGGTTGTG	3
CTGCCTCTTGT	3
CTGCCCTCCAC	3
CTGCCTCTGTC	3
CTGCCTTGCAC	3
CTGCATTTGGG	3
CTGCCTCTACA	3
CTGATAAAATA	3
CTGCATCAACG	3
CTGCGACTGTT	3
CTGAGTACAAT	3
CTGCGATTACG	3
CTGAGGTTATC	3
CTGAGTTTGTT	3
CTGCCTTTGTA	3
CTGCGATTCAC	3
CTGCCCTCATC	3
CTGAGTTTCCG	3
CTGCCCGAAAT	3
CTGCGATTACC	3
CTGCGACTCAC	3
CTGCGATTATT	3
CTGCGGCAGCG	3
CTGGCTCAAGA	3
CTGGCCCGGTT	3
CTGGATTTTCA	3
CTGGAAATACA	3
CTGCGTCTCAA	3
CTGGCTACTTC	3
CTGCGTCTATA	3
CTGCGTTATAT	3
CTGGCTTTGAT	3
CTGCGGCTGTG	3
CTGGGACACGA	3
CTGCGTCTTAT	3
CTGCGTCCCCA	3
CTGGCTTTCCG	3
CTGCGTTCCCC	3
CTGCGTTTATT	3
CTGCGGTTCCG	3
CTGCGTTTTAC	3
CTGCGGTTATT	3
CTGGGACCCCG	3
CTGCTATTCCG	3
CTGGAACATTA	3
CTGGGTTTCTA	3
CTGGTATCTAA	3
CTGGGATAATT	3
CTGGTATGCTG	3
CTGGGAGTAAT	3
CTGGGCATCCT	3
CTGGGCTGAAA	3
CTGGGATTGCT	3
CTGGGAGTGAG	3
CTGGGATTGCA	3
CTGGGAGTAGG	3
CTGGGTACCCG	3
CTGGGTTAAAA	3
CTGGGGTTATT	3
CTGGTGAAGCA	3
CTGGGGGTGTC	3
CTGGGATAGGC	3
CTGGGGGTAAG	3
CTGTGACTCCT	3
CTGTCCAACGA	3
CTGTCCCTCAC	3
CTGTCCCTAGG	3
CTGTGATAATT	3
CTGTGACATTA	3
CTGTGATATGC	3
CTGTGAGTCAC	3
CTGTGACTCCA	3
CTGTCCTCCAA	3
CTGTGACTGTT	3
CTGTGAGTAGT	3
CTGTGATTTCC	3
CTGTCCCAGCA	3
CTGTGCTAACC	3
CTGTGACTCAA	3
CTGTGCTATGC	3
CTGTGACATGG	3
CTGTGACTTAC	3
CTGTGCCCTCT	3
CTGTGCTATTC	3
CTGTGAAAACA	3
CTTGGACTCCG	3
CTGTGTTTTCG	3
CTGTGGTTCGT	3
CTGTGCTTTTT	3
GTGTGATTGTT	3
CTGTGCTTTAC	3
CTGTGGTTTAT	3
CTTGGATATTC	3
CTGTGGTTAGT	3
CTGTGTTTTAT	3
TTGGGCTTACG	3
CTGTGTTACCG	3
CTGTGTATTTT	3
GTGAGATAATT	3
CTTTGTCTGGA	3
TTGTGATTGTT	3
CTGTGGTTGGT	3
CTGTGTTTGTC	3
CTGTGGTTATC	3
CTGTGTCGGCT	3
CTGTGGGTGTG	3
CTGTGTTTTTA	3
GTGTGTTTCCG	3
CTGTGTGGCGT	3
CTGTGTTCATC	3
CTGTGTTGAAA	3
ATGTGACTCAC	2
ATGCGTTTTAT	2
ATGGGCTACGA	2
CAGTGTCAGCT	2
CGGGGTTTTAC	2
CCGGGTTTTGT	2
ATGGGTTTTGT	2
CAGTGATTCAC	2
ATGGGAGTAAG	2
CTAAGAATTTT	2
ACGGGATATGC	2
CAGTGACAGGG	2
ATGAGATAATT	2
CAGGGTTTGCG	2
ATGTGACAGGG	2
CGGAGACTAAC	2
CCGCGATTCCG	2
CCGGGTTGAAA	2
CTAAGATAATT	2
ACGAGACTAGT	2
CGGCGACGATC	2
CTAAGTCCAAT	2
ATGCGCTTTAT	2
CAGGGAGTAAG	2
ATGAGTTTTGT	2
CCGGGATTGCG	2
ATGAGATTGCG	2
CAGGGACTCCG	2
CCGTGACAGGG	2
CAGCGTGGAAT	2
CCGCGATTTTC	2
CGGGGATATGC	2
ATGTGACAGCG	2
CCTGGACATTC	2
CCGCGATTTCT	2
CAGCGCTACAA	2
CCGCGATTACT	2
CAGCGATTCCG	2
CCGCGACTCGA	2
CCGGGAGTAAA	2
CCGAGTTTTGT	2
CGGGGAGTAAA	2
CCGAGCTTTTC	2
CAGAGATAATT	2
ATGAGACTAAC	2
CGGGGACTGGG	2
CTAAGACTGGA	2
ATTGGACATTC	2
ATGCGCTTTAC	2
CCGTGTTTATT	2
CGGTGACTAAC	2
CCGCGTGGAAT	2
ATGAGCTTTTC	2
CCGTGTCGAAG	2
CCGAGAATTTT	2
CCGCGGTTATC	2
CGGTGTCGAAG	2
CCGCGCTTTAC	2
ATGAGACTGGA	2
ATGTGATTCAC	2
ATGTGACTCGC	2
ACGGGTATAAA	2
CCGAGATTAGT	2
ACGAGATTGTG	2
CCGAGATAATT	2
CAGGGTTCATC	2
CTGAGACTATT	2
CTGAGCCTAAT	2
CTACGCTTTAC	2
CTGAGATACTT	2
CTGAGACTCCT	2
CTGAGAATATT	2
CTGAGACAGGG	2
CTGAGAAGCTC	2
CTGAGAATTAT	2
CTGAGAAGCAA	2
CTGAAACAGAC	2
CTGAGATAAGT	2
CTCCGATTCCG	2
CTGAGCTATTC	2
CTGAGATTGAC	2
CTGAGCATAAA	2
CTGAGACAGCG	2
CTGAGAGTGCA	2
CTACGATTTCT	2
CTGACTTTCTA	2
CTGAGACTCTA	2
CTGACTTTATC	2
CTGAAATTAGT	2
CTGAGATTAGA	2
CTGAAAATTTT	2
CTGACTGCACT	2
CTGAGCCTAAG	2
CTGACTCTAGA	2
CTGAGATTCCA	2
CTGAGACTGTA	2
CTATGACAGGG	2
CTGAGATTAAC	2
CTAGGATTGCG	2
CTGAGCCTTTC	2
CTAGGACATTA	2
CTGAGACTGCG	2
CTACGTCTCCA	2
CTGACCGACGG	2
CTACGCCTAAA	2
CTGAGACTGAA	2
CTACGATTGTT	2
CTGCGACCCCC	2
CTGAGCTTAAA	2
CTGATCCTCCT	2
CTGATACTCGC	2
CTGCGATATGC	2
CTGCGACTCGC	2
CTGCATTTTAT	2
CTGCATTGGAA	2
CTGAGCTTTTA	2
CTGCGATTTCC	2
CTGAGTCCGTC	2
CTGCATGAGAA	2
CTGCGCATTAT	2
CTGCGCATCCT	2
CTGCGATTAGT	2
CTGAGTTTTCA	2
CTGCGATAGTC	2
CTGAGTTTTAT	2
CTGATATTGAT	2
CTGCGACTATC	2
CTGCGATTCAG	2
CTGCATCTCCA	2
CTGAGTCGAAG	2
CTGCGAGTGTT	2
CTGAGTCCCGA	2
CTGAGTTTGCG	2
CTGAGTCCAAC	2
CTGAGTTTCTA	2
CTGCGCCGACC	2
CTGCCGCCAAG	2
CTGAGTATTTT	2
CTGCACTTATA	2
CTGATGGTGCA	2
CTGAGTTTATA	2
CTGAGGTTAGT	2
CTGCGATTAAT	2
CTGATGAAAAA	2
CTGAGTTCTGT	2
CTGCGACACGC	2
CTGCACCTAAA	2
CTGCGATACCG	2
CTGAGTTAATT	2
CTGCGATTGTG	2
CTGCAATTTCT	2
CTGCCCTACGA	2
CTGAGTGAAGA	2
CTGAGCTCTTC	2
CTGCCAGGAAT	2
CTGCCAAGTAT	2
CTGCGGTTATA	2
CTGCGTGGAAC	2
CTGGAATCTAA	2
CTGGCGCCAAG	2
CTGGGACTACC	2
CTGGAACTGGG	2
CTGCGGCTCCA	2
CTGGCGAGTTC	2
CTGCGTGTGTG	2
CTGGAACAGTG	2
CTGGCCAATAC	2
CTGGAAAAAAA	2
CTGGAGTTTAT	2
CTGCTTCTCCA	2
CTGGACTAAAG	2
CTGCTCCTTAT	2
CTGCGGATATC	2
CTGCTATTGTT	2
CTGCGCTTAAT	2
CTGGGAATGGG	2
CTGGCTCTCGG	2
CTGCTATTACT	2
CTGGCTCCTCA	2
CTGCGTTTTGT	2
CTGCGTCTACG	2
CTGCGTTTTCC	2
CTGCGGTTGTA	2
CTGCGTTTTAG	2
CTGGCTAAGGA	2
CTGGCTTTAAG	2
CTGCGGTTACC	2
CTGCGTTTGTT	2
CTGGCGTTCTT	2
CTGGCCGGTTC	2
CTGCGGCCGCG	2
CTGGCCGGATT	2
CTGCGCTTTGT	2
CTGGGACTCAC	2
CTGGAATCCTG	2
CTGCGTTACCG	2
CTGCGCTCTAT	2
CTGGCCCCTTT	2
CTGGCCAGACC	2
CTGGGAGTGCG	2
CTGGGTCTGGG	2
CTGGTGTCCTA	2
CTGGGCTAACG	2
CTGGGCTACTA	2
CTGGGTCCCGA	2
CTGGGCAATTG	2
CTGGGTCTATA	2
CTGGGAGCAAG	2
CTGGGTCCATC	2
CTGGGACTGCG	2
CTGGGTCATCG	2
CTGGGAGTGTA	2
CTGGGTATGCG	2
CTGGGTTGACA	2
CTGGGTTTGCT	2
CTGGGATTTTT	2
CTGGGATTAGT	2
CTGGGCTTAGG	2
CTGGGTTCGTC	2
CTGGGATTGTT	2
CTGGGCGATAC	2
CTGGGCTTAAC	2
CTGGGATCGCG	2
CTGGGCTCACG	2
CTGGGCCTCCG	2
CTGGGTTATTT	2
CTGGGATCATC	2
CTGGGAGTGGG	2
CTGGGTTTTGC	2
CTGGGAGTGCC	2
CTGGGGTACAG	2
CTGGGCATAAA	2
CTGGGCCTACG	2
CTGGGAGTACA	2
CTGGGTTTTCG	2
CTGGGTTAGCG	2
CTGGGCTACGG	2
CTGGGTCTACA	2
CTGGGATATAG	2
CTGGGAGCGTC	2
CTGGGTTTGAG	2
CTGGGATTTAT	2
CTGGGCCTAAA	2
CTGGGACTTAT	2
CTGGGTTCAAC	2
CTGGTAGTAAA	2
CTGGGACTCCC	2
CTGGGTCCTCA	2
CTGGGATACGA	2
CTGGGCTCATC	2
CTGGGCCGGTT	2
CTGGGCTATGA	2
CTGGGAGTTTC	2
CTGGGATTGTA	2
CTGGGGAGCAT	2
CTGTAACAGGG	2
CTGTCCACGCG	2
CTGTGACCCGA	2
CTGTATGAGAA	2
CTGTGATTTCT	2
CTGTGATCCAC	2
CTGTGAAATGG	2
CTGTCACGACG	2
CTGTGCAAAGT	2
CTGTAATTAAG	2
CTGTCTTTTTA	2
CTGTGACCATT	2
CTGTGAGGCAG	2
CTGTGACAGTG	2
CTGTGACTTCG	2
CTGTGATAGTT	2
CTGTCTTCACC	2
CTGTGATTTGT	2
CTGTCTGCCTC	2
CTGTGAATGTT	2
CTGTGACTCTT	2
CTGTAACTATT	2
CTGTCTCTTAT	2
CTGTGACCCAC	2
CTGTGCGAAGC	2
CTGTGACCAAC	2
CTGTCTATTAT	2
CTGTGATTGCT	2
CTGTCTATAAC	2
CTGTGACAGGT	2
CTGTGACTCGA	2
CTGTGATTGCA	2
CTGTCGTTGAG	2
CTGTCCAAATT	2
CTGTCCTTGCA	2
CTGTGATAGCG	2
CTGTCCTTATC	2
CTGTATTTACT	2
CTGTGATCTCT	2
CTGTATCGTCG	2
CTGTGACTAGC	2
CTGTACAATTG	2
CTGTCCTATCG	2
CTGTAACTCGC	2
CTGTCCTAGAC	2
CTGTGATTCTT	2
CTGTCCTAAAT	2
CTGTGTTTCGG	2
CTGTGTCAACT	2
CTGTGGATCCA	2
CTGTTTCTGGC	2
CTTCGTCTCCA	2
CTGTTTCTGGA	2
CTGTGGTGTGT	2
CTGTTGAAGGG	2
CTGTGCTTCGC	2
CTTGTACATTC	2
CTGTGTTTTAC	2
CTGTTCCCACC	2
CTTCGACGATC	2
CTGTGTGTATT	2
CTTTGCTTCTG	2
CTGTTCCACTG	2
CTGTGTTTACG	2
CTTGGTTTGCG	2
CTGTTTGTAGA	2
CTTGGGCATTC	2
TTGGGATATGC	2
TTGCGCTTTAC	2
CTTGGACAATC	2
TTGAGATTGTG	2
CTGTGTATGTC	2
CTGTGTCTAAG	2
CTGTGTATATC	2
CTGTGTCTAAC	2
CTTAGTCCAAT	2
CTTGGACGTTC	2
CTGTGGTTCAC	2
TTGTGTTTCCG	2
CTGTGTTTCCC	2
GTGTGTTTTTT	2
CTTAGATTGAT	2
CTTGGCTTACG	2
CTGTGGCTCTA	2
CTTGGACATCC	2
CTGTGGAGTCA	2
CTGTGTCAGTT	2
CTTTGTTTCCG	2
CTGTGTCAGCG	2
CTGTGTTCCGT	2
CTGTGTCAGCA	2
CTGTGCTGTTT	2
CTGTGTTCTTT	2
CTTTGTCAGCT	2
CGGAGATTTTT	1
ATGCGCTTGTC	1
CAGTGTCTAAG	1
CAGGCCTTACA	1
ATGAGACTCGC	1
CAGGCCTCGGA	1
ATGGGTTCATC	1
CAGGATTTATT	1
ATGGAATTTAT	1
CCGCTATTGTC	1
CCGGGAGTAAG	1
CAGCGTCTGTT	1
ACGCGTCTCCA	1
CGGGGAGTAAG	1
CCGTCTCTGGC	1
CAGCGTCTGGG	1
CTAAGATATGC	1
CGGTGACTATA	1
CAGTGCTTAAC	1
CAGCGTAAGTG	1
ATGCGTCTACA	1
CAGCGGTTATC	1
ATGCGACTCGA	1
CAGCGGCTGTG	1
ATGAGATTCTC	1
CAGCGGCTGCG	1
ACTAGATTGTT	1
CAGCGCTTTAT	1
CCGGAATTTAT	1
CAGCGCTTTAC	1
CCGTGACAGCG	1
CAGCGCTTCGC	1
CGGGGTTTGTT	1
CCGCGTCTACA	1
CCGAGACTACC	1
CAGCGCCTAAA	1
CGGTGATTATT	1
CAGCGATTTTC	1
CCGGGTTCATC	1
CAGCGATTGTT	1
ATGGGAAACTA	1
CCGTGTTTTCC	1
ATGCGTGGAAT	1
CAGCGACGATC	1
CAGTGACTCTA	1
CAGCCTCTGTG	1
ATGCGATTGTT	1
CAGCCTCCGGG	1
CAGGTTTTATT	1
CTAAGATTGAT	1
CAGGGTTGAAA	1
CAGAGCCTAAA	1
AAGCGTCTTTG	1
CCGCGCCTAAA	1
CAGGGATATGC	1
CGGGGACTCCG	1
CAGGGAGTGTC	1
CGGGGACATTA	1
CCGGATTTGCG	1
CAGAGACTCGC	1
CCGAGATTGCG	1
CAGAGACTAAC	1
ATGGTACTGGT	1
CAGACCTTCAG	1
ATGGGTTTGCT	1
CACTGACAGGG	1
ATGGGTTTCGA	1
ATTTGTCTGGA	1
ATGGGTTTAGT	1
ATTTGCTTCTG	1
ATGGGTCTATC	1
ATTTGACATCC	1
CCGGGTTTTAC	1
ATTGGATATGC	1
ATGGGATCCTG	1
CGGGGAAACTA	1
CGGGGTCTATC	1
ATGTTATTGTT	1
CAGTGTCGAAG	1
CCGTGGTTTGT	1
ATGGGACGACT	1
ATGTGTTTTCC	1
ATGGGAATTTT	1
ATGTGTTTTAT	1
ATGGCCAATAC	1
ATGTGTTTCTA	1
CCGGGCTTACG	1
CGGCGTGGAAT	1
ATGCGTCTCCA	1
ATGTGTCTTAT	1
CGGAGATACTT	1
ATGTGTCTGGA	1
CGGGGATTCTT	1
CGGCGTCTGTG	1
CAGTGACTAAC	1
CCGCGACGATC	1
CGGAGATAAGT	1
ATGTGTATGTT	1
ATGCAAAAAAT	1
ATGTGCTGTTC	1
ATGAGTCCAAT	1
ATGTGCTCAAT	1
CTAAGACTCCC	1
ATGTGCTAGTT	1
CGGGGAGTGTC	1
CGGTGACAGCG	1
CGGAGAAAAAA	1
ATGTGATTGTA	1
CCTGGTCTATC	1
CTAAGATTAGT	1
CAGGGATTCTT	1
ATGTGAGTGTC	1
AGGAGATAATT	1
ATGTGACTCTC	1
ACGTGTATAAA	1
ATGTGACTCTA	1
CCGGCCACCTT	1
CCGAGCCTAAA	1
ACGAGATTGTT	1
CCGAGATTTTT	1
ACGAGATTCTC	1
ATGTGACTATA	1
CGGAGTTTACA	1
ACGACCGAGTT	1
CAGGGTATATC	1
AAGAGTCTTTG	1
CAGGGCTTACG	1
CAGGGCTACGA	1
CTCGGACTGGG	1
CTGAGATAGAT	1
CTGAGATTGGG	1
CTGAGAGTTTT	1
CTCTGATTGTT	1
CTGACTAAGGA	1
CTCACCCGGCG	1
CTGACGTTCCA	1
CTAGGTTGAAA	1
CTGACGTTCAT	1
CTCTGTTTCCG	1
CTGAGAAAGGA	1
CTGAGACTCCG	1
CTGACGGGGGT	1
CTCCGCTTTAT	1
CTGACGCTTCC	1
CTATGTTTATT	1
CTGACGCCAGC	1
CTGAGAGAAAT	1
CTGAGACTGGC	1
CTAGGATTCTT	1
CTGAGAATAAC	1
CTGAGAACTCC	1
CTGAGATTTAC	1
CTCTGTCAGCT	1
CTGACCTTAAT	1
CTCTGACTCTA	1
CTGAGAAAATT	1
CTCGGCTACGA	1
CTGAGACTGCC	1
CTGAGCTATAC	1
CTGACCTCATC	1
CTCAGTCCAAT	1
CTGACCTAATC	1
CTATGTTTCTA	1
CTGACCGTGGA	1
CTGAGACTATC	1
CTGACCGTGCA	1
CTGAGACTACA	1
CTGAGACTGAT	1
CTATCACCCCC	1
CTGAGAAAATG	1
CTAGGCTTACG	1
CTGACCCTGGT	1
CTGAGACCCCC	1
CTGAGATTCTA	1
CTGAGACTTGC	1
CTGACCCCGTG	1
CTGAGATTCTG	1
CTGAGATTGAA	1
CTCTGTCGAAG	1
CTGACCACCTT	1
CTCTGCTTTGT	1
CTGACCAAGCA	1
CTCTGATACAC	1
CTGAGCCTTAA	1
CTCTGACAGCG	1
CTGACATTGTG	1
CTCGGTTGAAA	1
CTGACATTAGT	1
CTCGGAGTAAG	1
CTGAGCATTAT	1
CTCGGACTCCG	1
CTGAGATAGAG	1
CTCCGTTCTGT	1
CTACGACGATC	1
CTGAGATTAGC	1
CTAAGTTTATT	1
CTCAGACTACC	1
CTGAGCCCAAA	1
CTGAGAATGGA	1
CTGAGAAAAAC	1
CTGAGATTGTC	1
CTGAGCCTATT	1
CTATGTCTTAT	1
CTGAATACAAT	1
CTGAGATATTG	1
CTGAACTTTTC	1
CTGAGATAGTT	1
CTGAACTCTGT	1
CTGAGACTAAT	1
CTGAACAAATT	1
CTGAGCCGCGT	1
CTGAGCCTAGT	1
CTGAGATAATC	1
CTGAAATCCGA	1
CTAGGTTCATC	1
CTGAAATAATT	1
CTGAGATTACT	1
CTGAAACTGGA	1
CTGAGATAGCG	1
CTGAGAGTGAT	1
CTGAGACCACC	1
CTGAGAGTAGT	1
CTGACTTAGAA	1
CTGAGATCGCG	1
CTGAGACTTGA	1
CTGAGCTACAA	1
CTGAGATTTCT	1
CTGAGAATGTG	1
CTGAGAATACA	1
CTGAAAAAAAA	1
CTGACATTAAC	1
CTGAGACAATT	1
CTGACAGTTCG	1
CTGAGCCGACC	1
CTGACACTAAT	1
CTAAGTTCATC	1
CTGAATTTTGT	1
CTGAATTTTAC	1
CTGCACTTCGC	1
CTGATTCCAAT	1
CTGCCTCTCCA	1
CTGCCCTTTGT	1
CTGCGATAAAC	1
CTGATGATTCT	1
CTGAGGTTGCG	1
CTGATGATAAA	1
CTGCAAAACGT	1
CTGATGAAAGT	1
CTGAGTCTACA	1
CTGATGAAAAC	1
CTGAGTCCACT	1
CTGCGACTGGG	1
CTGAGTATGTT	1
CTGATCTTTAT	1
CTGAGGTAATT	1
CTGATCCTTTC	1
CTGCAAAATTA	1
CTGCGAATCCC	1
CTGCCTATTTG	1
CTGATCCGCTG	1
CTGAGTCTGTT	1
CTGATCCCGAC	1
CTGAGTCTAAA	1
CTGATCCATGG	1
CTGCGACCCTA	1
CTGCGAATATC	1
CTGAGTCCAAG	1
CTGCCCTAGTC	1
CTGCACGCGTT	1
CTGCGAATACA	1
CTGCAATTTTC	1
CTGCGATGATC	1
CTGCAATTACT	1
CTGCCCGGAAT	1
CTGAGGCTGCG	1
CTGCGAAGACT	1
CTGAGGCGGTA	1
CTGCGCCTAGA	1
CTGCGACAGGG	1
CTGATACTACC	1
CTGCGATTACA	1
CTGCCCCCGAA	1
CTGATTTGGGG	1
CTGCCCATTAT	1
CTGCCTGTCTC	1
CTGCCCAGGAC	1
CTGCATCTGCT	1
CTGAGTTTTTT	1
CTGAGTCTAAT	1
CTGCCCAGAAC	1
CTGCGACGAAC	1
CTGCCCACCGA	1
CTGAGTCCGAT	1
CTGCGATCCCC	1
CTGAGTCCAGT	1
CTGCGATATTC	1
CTGCAGTTTCA	1
CTGCCACATTA	1
CTGCAGTTATC	1
CTGAGTTTTAA	1
CTGCCTCTGTG	1
CTGCGCCTGAA	1
CTGCGCCTCCA	1
CTGCGATAGTT	1
CTGAGTATATT	1
CTGCGCCTAAT	1
CTGCGATTCTG	1
CTGAGTTTGCA	1
CTGCAATTGTT	1
CTGAGTTTGAT	1
CTGAGGTTAGC	1
CTGCCTTTATT	1
CTGCAACTCCC	1
CTGCGACTCAA	1
CTGCAACGATC	1
CTGCGCAAACA	1
CTGAGGCTAAA	1
CTGCGCCTAAC	1
CTGCGCATAAA	1
CTGCCTTCTCC	1
CTGCAAAATAA	1
CTGAGTTTAAA	1
CTGAGCTTTGT	1
CTGAGTTGCCA	1
CTGAGCTTGTG	1
CTGCGACGTTC	1
CTGAGCTTATC	1
CTGAGTTATGT	1
CTGAGCTTAAG	1
CTGCGATAACT	1
CTGAGCTGTTA	1
CTGCCTTAAGG	1
CTGCGATTTCG	1
CTGCCTGTTCT	1
CTGCGGGGAAT	1
CTGGAATCCGA	1
CTGCGCTTTTC	1
CTGCGTTTATC	1
CTGGCCTCGAC	1
CTGGGAATGGT	1
CTGCGGCTATC	1
CTGGCCGGATC	1
CTGCGCTTTAA	1
CTGCGTTTACA	1
CTGGGACCATC	1
CTGGCCGGACT	1
CTGGCTTTATT	1
CTGCTCCCAGT	1
CTGGGAATATA	1
CTGCGTTCGGT	1
CTGCGGATTCG	1
CTGCGTTCGCG	1
CTGCGCTTTCA	1
CTGGGACATGA	1
CTGCGCTTCGA	1
CTGGGACAGGG	1
CTGGCTTGGTA	1
CTGGCCCTAAA	1
CTGCGGTTTCT	1
CTGGCTGTTAC	1
CTGGAATAAAA	1
CTGGGAACACA	1
CTGGCCTACTT	1
CTGCTATTTTC	1
CTGGAACTCCG	1
CTGCGTTACAA	1
CTGCGGCTCGA	1
CTGCTATTTCT	1
CTGCTGAAAAA	1
CTGGCTCTTAC	1
CTGCTCTTAAC	1
CTGGAACTTAT	1
CTGCGCTTTGC	1
CTGCGTGGATT	1
CTGCGCTTTAG	1
CTGGCCTGCCG	1
CTGCGCTTGAC	1
CTGGCCCAATT	1
CTGCGCTTACG	1
CTGCGTGGAAG	1
CTGCGCTCCAA	1
CTGGCCTTCCT	1
CTGCGTCACCA	1
CTGCGTGATCC	1
CTGCGTATAGT	1
CTGGGAATGTC	1
CTGCGGTTGTT	1
CTGGCCAGGGC	1
CTGGATTTACA	1
CTGGAATAATA	1
CTGGCTTTCAC	1
CTGCGTCTGTA	1
CTGCGGTTACT	1
CTGCGTCTGGG	1
CTGGACTACGA	1
CTGGCCACGCC	1
CTGCGGCTGTT	1
CTGCGTCTCCT	1
CTGGGACAACA	1
CTGCTACTCCC	1
CTGCGGCTGAG	1
CTGCGTCTCCC	1
CTGCTGAAGGG	1
CTGGCATTGCT	1
CTGCGGCGGTA	1
CTGGGACACTA	1
CTGGGACGATA	1
CTGCGTCTATG	1
CTGCGGATGCG	1
CTGGCAATTTG	1
CTGGGACCTTA	1
CTGGATTTTGG	1
CTGGGACATGG	1
CTGCGTCTACT	1
CTGCGCTTTCT	1
CTGCTAATATC	1
CTGGAATTGCG	1
CTGGCTATGTG	1
CTGGAATTCTT	1
CTGCGTCTAAT	1
CTGGAAGTAAG	1
CTGCGTCGGTG	1
CTGCGTTTGAC	1
CTGCGTCGCGT	1
CTGCGCTTCAC	1
CTGCGTCCGTG	1
CTGCGTTTCCG	1
CTGCGTCCCCC	1
CTGCGTTTCAT	1
CTGGGAATCCG	1
CTGGCGGTAAC	1
CTGCGTCCAAT	1
CTGCGTCAGCT	1
CTGGGTTTAAC	1
CTGGTCTACGA	1
CTGGGTTGATT	1
CTGGTTTTGCT	1
CTGGGTGTACA	1
CTGGGATTTCG	1
CTGGGAGACTT	1
CTGGGTATAAT	1
CTGGGTTTCGT	1
CTGGGTAGAAA	1
CTGGGTGTGTC	1
CTGGGTTTCAT	1
CTGGGCTAGCT	1
CTGGGATTGTC	1
CTGGTATTATT	1
CTGGGTAAGGA	1
CTGGGTTGGAA	1
CTGGGATTGGG	1
CTGGGTTTTCT	1
CTGGGTAACTA	1
CTGGTTTGGGT	1
CTGGGTAAATC	1
CTGGGTGTTGT	1
CTGGGGTTTTT	1
CTGGGTTTACC	1
CTGGGTTCCTG	1
CTGGGCTATGC	1
CTGGGGTTATC	1
CTGGGAGTAAC	1
CTGGGATTCTC	1
CTGGGAGGAAA	1
CTGGGATTCCT	1
CTGGGAGAGTC	1
CTGGGTTTCAA	1
CTGGGAGAAGA	1
CTGGTTCTATC	1
CTGGGACTTCG	1
CTGGGTTCATA	1
CTGGGTTGAGA	1
CTGGGTTCACC	1
CTGGGCCCTCG	1
CTGGGATTAAA	1
CTGGGTTCTGT	1
CTGGTTCATGC	1
CTGGGAGTTAG	1
CTGGGATGGCG	1
CTGGGAGTGTG	1
CTGGGATCTGT	1
CTGGGTGTGTG	1
CTGGGGGAACC	1
CTGGGTGTGCG	1
CTGGGATCCTT	1
CTGGGAGTGCA	1
CTGTAAAACAA	1
CTGGTCAAACT	1
CTGGGATCCAG	1
CTGGGTCTTAT	1
CTGGGATCATG	1
CTGGGTCTGTG	1
CTGGGTTATGC	1
CTGGTATTGCG	1
CTGGGTTAGTT	1
CTGGGTCTCCA	1
CTGGGATATTA	1
CTGGGCTAAGA	1
CTGGGGCATTA	1
CTGGGAGAGTT	1
CTGGGGCACTG	1
CTGGGAGAGAA	1
CTGGTTTTCGA	1
CTGGGTTGTGT	1
CTGGGCTTTTC	1
CTGGGAGAAAA	1
CTGGGATATCC	1
CTGGGACTTCT	1
CTGGGCTTTCC	1
CTGGGTCTAGA	1
CTGTAAAAAAC	1
CTGGGCCTAAG	1
CTGGGTTACGA	1
CTGGGACTGGC	1
CTGGTCTTAAG	1
CTGGGCCGCGT	1
CTGGGCTTCTT	1
CTGGGTTGAAG	1
CTGGGTTAATA	1
CTGGGACTCGC	1
CTGGGTTAACT	1
CTGGGCAAAGT	1
CTGGGATAAGC	1
CTGGGTTAAAT	1
CTGGGGCCAGT	1
CTGTCAAAATT	1
CTGTGATTGCG	1
CTGTACGCGTT	1
CTGTCTACTAT	1
CTGTCATAAAA	1
CTGTCGTTTGT	1
CTGTGCATCCT	1
CTGTGAGTTTC	1
CTGTAAGGAGA	1
CTGTGAGTAAA	1
CTGTGACTGTA	1
CTGTCGCCAAG	1
CTGTCACCTCC	1
CTGTCCTTTTT	1
CTGTCTCTTTC	1
CTGTGATTAAC	1
CTGTGATACGA	1
CTGTGATTAAA	1
CTGTGAATCCG	1
CTGTCTTTTTG	1
CTGTAACTCAC	1
CTGTCCTTCAA	1
CTGTGACAGGA	1
CTGTGATTGGT	1
CTGTGAAACTG	1
CTGTGAATCAC	1
CTGTCACTCAC	1
CTGTGATGGTG	1
CTGTCACAGGG	1
CTGTCCTTACT	1
CTGTGACTCTC	1
CTGTGCTCAAA	1
CTGTGACACTA	1
CTGTGATCGTT	1
CTGTATCAGCT	1
CTGTGCCTGGA	1
CTGTCTCTGGT	1
CTGTGCCTCAC	1
CTGTGATTACT	1
CTGTGCAAAAA	1
CTGTAATTCAC	1
CTGTGACTACT	1
CTGTAACTCTA	1
CTGTGAGACTA	1
CTGTAACTAAC	1
CTGTCTTTCCG	1
CTGTCCAGCGG	1
CTGTGACTTTA	1
CTGTCTGTCCT	1
CTGTGACTAAT	1
CTGTGATTTTC	1
CTGTGCCTAAC	1
CTGTCCAAACG	1
CTGTGACTAAA	1
CTGTCAGCAGT	1
CTGTCCGGTAT	1
CTGTGATTCCC	1
CTGTGACGTCT	1
CTGTCACATCG	1
CTGTGACGGGG	1
CTGTCAAGGCG	1
CTGTGACGAAG	1
CTGTCTGCCCT	1
CTGTGAGTGTT	1
CTGTGACAGAG	1
CTGTCTTGGGG	1
CTGTATTGACT	1
CTGTCCGAATT	1
CTGTGACAAGG	1
CTGTCTTCTTT	1
CTGTGCGAGTT	1
CTGTCCCTCCC	1
CTGTATATGTT	1
CTGTGACCATA	1
CTGTGACAAAC	1
CTGTGATTCAA	1
CTGTACTAGTT	1
CTGTCTTCACT	1
CTGTACCCTCG	1
CTGTGATCCAA	1
CTGTGAATGGG	1
CTGTGACATCG	1
CTGTAATTGTA	1
CTGTGCCACCT	1
CTGTGAAAATA	1
CTGTCTTCACA	1
CTGTAAGGAAC	1
CTGTCCCACTG	1
CTGTGAAAACT	1
CTGTCCATTCA	1
CTGTCTATCGT	1
CTGTGCCACTC	1
CTGTGCCCAAT	1
CTGTCCATCAC	1
CTTTCCCTCCT	1
CTTGGAGTAAA	1
CTGTGTATTGT	1
CTTTCCCCGAT	1
GTGAGAATTTT	1
CTGTGTTTTCA	1
GTGTGGTTTGT	1
CTTGGACATGC	1
CTGTGTAGAAG	1
CTTTGTAGAAG	1
CTGTGGTGTTC	1
TTGGGACTGGG	1
GCGGCCACATA	1
CTTGGACATAC	1
CTGTTTTGAAA	1
CTTGGACACTC	1
CTGTGTCAGAT	1
CTGTGTTTGAT	1
CTTTGACATTC	1
CTTTGGTTTGT	1
GTGCGATTTTC	1
TTGGGACTCCG	1
CTGTTATATCA	1
CTTGGAAATTC	1
CTGTTACTCTA	1
CTTGAAAAATC	1
CTGTGGCCAGA	1
TTGGGACATTA	1
CTTTGTTTCTA	1
CTTCGTTTTAT	1
CTGTGCTCTAT	1
TTGGAATTTAT	1
CTGTGTCAGGT	1
TTGCGTTTTAT	1
CTGTGTCAGCC	1
CTGTGTTTCAC	1
CTGTTTCGAAG	1
TTGCGTTTGGT	1
CTGTTGTTTAT	1
CTTCGTTATTG	1
CTGTGTATATT	1
TTGCGTCTCCA	1
CTGTGTACACA	1
TTGTGATTCAC	1
CTTGGAGTAAG	1
CTTCGCTTTAC	1
CTGTTATTGTA	1
CTTCGCTACAA	1
CTGTGGTTAGA	1
CTGTGTTCTCC	1
CTGTGGTAAGC	1
CTGTGTTCCTA	1
CTGTGGGTGAG	1
CTTCGATTTTC	1
CTGTGGCTAAC	1
CTGTGTTCCGA	1
CTGTTACTAAC	1
CTTCGACTCCC	1
CTGTGTTTTTG	1
CTGTGTTCATT	1
CTGTGCTTCCG	1
CTTGGTTGAAA	1
CTTTGTCTTAT	1
CTTCCTCTATA	1
CTGTTTTTACG	1
CTTGGTCTATC	1
CTTTGACTCTA	1
CTGTGTTACTA	1
CTGTGTCAGGC	1
CTTAGCCTAAA	1
CTTGGCTACGA	1
CTGTGTGTCCG	1
CTTGGATTGCG	1
CTTAGATTTAT	1
CTGTTTCTAAG	1
CTGTGTGTAAG	1
CTGTTTATGTT	1
CTTGGTCATTC	1
CTGTGTATTCT	1
CTTTGATTCAC	1
CTTTGACTAAC	1
CTGTGTCTTGT	1
CTGTGTATGCT	1
CTTAGATTAGT	1
CTGTTCCTCAG	1
CTGTGTCTTCT	1
CTGTGTACGTT	1
CTGTGTCTTCC	1
CTGTGGTTTTT	1
CTTAGACTCCC	1
GTGCGATTCCG	1
CTGTGTCTGGG	1
GTGAGATTGTG	1
TTGAGCTTTTC	1
CTTGGACTTGG	1
CTTAGACTAAC	1
CTTTGACAGGG	1
TTGAGATAATT	1
GTGAGATTGAT	1
TTGAGACTGGA	1
CTGTGGTTAAC	1
CTGTGTCTATC	1
CTGTTAGTGTC	1
TTGAGACTAAC	1
CTGTGGGTTGT	1
CTGTGTCTAGA	1
CTGTTACTCGC	1
CTGTGTCTACA	1
CTGTTACTCAC	1
CTTAGACATTC	1
CTGTGGCTAGC	1
CTTAGAATTTT	1
GGGAGATTAGT	1
TTGTGACTCGC	1
CTGTGGCAGCG	1
CTGTGTCGATG	1
CTGTTACAGCG	1
CTGTGTCGAGG	1
TTGGGTTCATC	1
CTGTTTTTTAT	1
CTGTGCTTGAC	1
TCGTGTCAGCT	1
TTGGGTATATC	1
CTGTGTCCGTC	1
CTTTCTGTACT	1
CTGTGTCCGGA	1
CTTGGACATTG	1
CTGTGTCCCGC	1
CTGTGCTGCTC	1
TTGGGTTTGCG	1
TTGTGACTCTA	1
CTGTGTCCAAT	1
CTGTGTTTATA	1

## Sheet: CflCas9 PAM_counts
7mer	counts number
CTGCAAAAAAT	137208
CTGTGAAACGG	137025
CTGAGAAATGT	131471
CTGTAAAATCC	15945
CTGGGAAACTA	13942
CTGTGCAATGC	10916
CTGGGTTAGTA	8702
CTGGAAAAGGA	5353
CTGGGTATAAG	4059
CTGGACAAGTC	2033
CTGCACGTGAT	1771
CTGCAAATGTT	1690
CTGTCATATCG	1660
CTGCGCACGCG	1626
CTGACTTAAAA	1437
CTGCGGAACCC	1054
CTGAGCAAGCC	1035
CTGGCGAAACA	914
CTGACCAAGCA	882
CTGGCAAAAGC	605
CTGTCGACCGG	602
CTGTATATAAT	602
CTGTACAAAAT	594
CTGCCGAATTT	593
CTGACAGAATA	583
CTGCCAGCGTT	581
CTGTCGACCGT	579
CTGGGAATTTT	577
CTGACTTTTTT	558
CTGACAGAAAA	547
CTGAGATAATT	545
CTGGCACATTC	543
CTGTGTTTATT	512
CTGCCGAAGAG	497
CTGCATTTTGG	493
CTGGCAAATGC	488
CTGACAGCGAT	485
CTGACAGGAAA	482
CTGACCAAAAA	464
CTGACAATCGG	463
CTGGCAACACT	461
CTGGCAAGTTC	448
CTGCCATAGGG	444
CTGACGAAGGG	402
CTGACTATATA	399
CTGACAAAAAA	379
CTGACAATTGG	331
CTGTCTATTCC	245
CTGTGTGGGGC	224
CTGTCAGTTTG	143
CTGCGAAAAAT	137
CTGCATGTCAT	114
CTACAAAAAAT	96
CTGGGCGGTCT	93
CTGTGAAACTG	77
CTGAGAAATAT	70
ATGTGAAACGG	70
CTGTGAAATGT	66
ATGAGAAATGT	66
CGGAGAAATGT	66
CCGAGAAATGT	65
CTGAGAAACGG	61
CTGAAAAAAAT	60
CCGTGAAACGG	59
CTGTGAAATGG	56
CTGTGAAACGT	56
ATGCAAAAAAT	53
CTGAGAAATCT	52
CTGGCCCAATG	50
CCGCAAAAAAT	50
CTGTAAAAAAT	48
CTATGAAACGG	48
CTGACCTTATC	47
CTGGGAAATGT	45
CTGTGAAACGA	42
CTGCCCTTATA	38
CTGTGGAACGG	37
CTGTGAGACGG	36
CTGTCTATTTG	36
CTGCAAAAAAC	35
CTGAGAAATGC	35
CTGACCAAAAC	35
CAGTGAAACGG	34
CTGAGAAAAAT	34
CTGATAAATGT	34
CTGTGAAAAGG	33
CTAAGAAATGT	33
CAGCAAAAAAT	33
CTGAGAAATTT	32
CTGAGGAATGT	31
CTGTAAAACGG	30
CTGTGAAGCGG	29
CTGCGAAACGG	29
CTGAGAAACGT	29
CTGAGAAGTGT	28
CTGCAAAAAGT	27
CTGAGAGATGT	26
CTGAGACATGT	26
CTGTGAAACAG	25
CTGCAAAGAAT	24
CTGGGACACTA	20
CTGTGAAACTA	20
CTGTGAAATCC	20
CTGCAAAAAAA	20
CTGAGAAATGA	19
TTGCAAAAAAT	18
CTGTAAAATCA	18
CTGTTAAACGG	17
CTGTGGAATTC	17
CTTTGAAACGG	17
CTGCCAATTGT	17
CTGCAGAAAAT	17
CTGCACAAAAT	17
CTGCAAAAATT	17
CTTAGAAATGT	16
CTGAGAAATGG	16
CTGATGTGTGG	16
CTGAAAAATGT	16
CTGAGAAAAGT	16
CTGTAAAATCT	14
CTGTGCGGTCT	13
CTGAGGGTGCA	13
CTTCAAAAAAT	12
CGGCAAAAAAT	12
CTGCAAAAGAT	12
TTGTGAAACGG	11
CTGTCTTTATT	11
CTGTACAAAAA	11
CTGAGAAACTA	11
CTGAGTAATGT	11
CTGATCATAGG	11
CTGGGTTTATT	10
CTGGCGAAGTT	10
CTGCCAAAAAT	10
CTGAGAACTGT	10
CTGAGAATTGT	10
CGGTGAAACGG	10
ATGGGTTAGTA	10
CTGCAAGAAAT	10
CTGGCACTCTA	9
CTGTGAAATTC	9
CTGCAAACAAT	9
CTGAACAATTG	9
CTGTGAAAAAT	8
CTGGGGAACTA	8
CTGTGTAACGG	8
TTGAGAAATGT	8
CCGTGCAATGC	8
CTGGCTATAAC	7
CTGTGCAATGT	7
CTGGGAAACGG	7
CTGGGAAACTG	7
CTGGAAAAAAT	7
CTGGCTATCGG	7
CTGTCCAATGG	7
CTGGGTGGTCT	7
CTCCAAAAAAT	7
ATGTAAAATCC	7
CTGCAAAATGT	7
CTGCATTCTCC	7
CCGGGAAACTA	7
CTGTGTTAGTA	6
CTGGGAAACCA	6
CTGTGACACGG	6
CTGTCCAAATT	6
CTGTCTATACG	6
CTGGATTTTCA	6
CTGTCTGTACT	6
CTGTACAATGC	6
CTGACTTAAAG	6
CTGCCTTTTCT	6
CAGAGAAATGT	6
CTGCAATAAAT	6
CTGAGAAAGGT	6
CTGTCAAAATC	5
CTGTGAACCGG	5
CTGTCTATTTT	5
CTGCTAAAAAT	5
CTGGTAAACTA	5
CTGGGAAACTC	5
CTGTCAATAGC	5
CTGGGAAAGGA	5
CTGTGAAATGC	5
CTGGGAGACTA	5
CTGTGAATCGG	5
CTGGAAAAGTA	5
CTGGATTTACA	5
CTGCCTATGGC	5
ATGGGAAACTA	5
CTGAGATATGT	5
CTATAAAATCC	5
CTGCCAGTACA	5
CCGTAAAATCC	5
CTGCGAAATGT	5
CTATGCAATGC	5
CTGCAAAATCC	5
CTGTGGTTTGT	4
CTGCTGAACCC	4
CTGTGAAACGC	4
CTGGCCTACTT	4
CTGTGCATACA	4
CTGTAAAAACC	4
CTGCGTGGAAT	4
CTGGAGAAGGA	4
CTGGCACAGAC	4
CTGTACGTGAT	4
CTGTGATACGG	4
CTGGATTTAGA	4
CTGTGCGATGC	4
CTTGGTTAGTA	4
CTGGCATCTAT	4
CTGTCTATGAA	4
CTTGGAAACTA	4
CTGCCAGTTAT	4
CTGCAAATAAT	4
CTGACGATTGG	4
CTATCGACCGT	4
CTGCCAAGTAT	4
CTGAGAAATCC	4
CTGACTTTCAG	4
CAGTAAAATCC	4
CTGACAGGAAT	4
ATGTGCAATGC	4
CTGCCAACGAT	4
CTGAAAGCTAC	4
CTGACCAAGTA	4
CTGAGCTTACG	4
CTGCCATCTTC	4
CTGAGTTTTAC	4
CTGACAACCAA	4
CTGCAACAAAT	4
CTGTGTAATGC	3
CTGTGCAATTC	3
CTGGAAAAGGG	3
CTGGGTTGGTA	3
CTGTCACATCT	3
CTGTCTACAAA	3
CTGGGTCAGTA	3
CTGTCTATAAC	3
CTGGGTATAAT	3
CTGGCCATACA	3
CTGTCAAACGG	3
CTGCGTCAAAG	3
CTGTCAGAAGC	3
CTGGAAAAGAT	3
CTGGCATATCC	3
CTGTAAAAGGA	3
CTGGCATTGCT	3
CTGTAAAATAC	3
CTGTCATTTTT	3
CTTTAAAATCC	3
CTGCGGAGCCC	3
CTGTCCAGCGG	3
CTGCCTGCTCG	3
CTGCCAATGCC	3
CTGCATTTCTA	3
CTGAGCAATGT	3
CTGCGCAAACA	3
CTGAATTTAGT	3
CTGCATTTAGT	3
CTGACAACTTC	3
CTGACCAAGCT	3
CTGCGCAATGC	3
CTGCCAGCGAG	3
CTGACAGAAAG	3
CTGCCATTTCT	3
CTGACATAAAC	3
CAGGGTTAGTA	3
CTGAACAAATT	3
CGGGAAAAGGA	3
CTGTAAAACCC	2
CTGTGTTTTTT	2
CTGTAATATCG	2
CTGTCAGAACT	2
CTGGCTTTGGC	2
CTGGAAACGGA	2
CTGTGCAACGG	2
TTGGGAAACTA	2
CTGCGCGAACT	2
CTGGGTTAGTT	2
CTGTTCTTAAA	2
CTGTCATATCT	2
TTGCGGAACCC	2
CTGTCATCAAA	2
CTGGGAACCTA	2
CTGGGCTAGTA	2
CTGGGAAATTA	2
TTGTGCAATGC	2
CTGTGCTATGC	2
CTGGGTTTACT	2
CTGTAGAATCC	2
CTGGCCTAAGG	2
CTGTTACATTA	2
CTGTCCTAGAC	2
CTTGAAAAGGA	2
CTGTCCTATTC	2
GTGGGAAACTA	2
CTGTCCTTATA	2
CTGGGAAACGA	2
CTGTCGAAACA	2
CTGGCCATGGT	2
CTGTCGAAGAT	2
CTGTGCAACGC	2
CTGCGTAACCC	2
CTGTGCAATAC	2
CTGGAAAGGGA	2
CTGTGCAGTGC	2
CTGGGTACAAG	2
CTGGGTGCAAA	2
CTGGTAAATGC	2
CTGGCATACCC	2
CTGCTCTAACG	2
CTGGGTGTATT	2
CTGTCTCTGGC	2
CTGTGTTTCCC	2
CTGTCTTCCAA	2
CTGGCTACTTC	2
CTGTCTTGGCG	2
CTGTTCAATGC	2
CTGTCTTGTTT	2
CTGGGTTACTA	2
CTGGTAAGTTC	2
CTGTCAAATCC	2
CTGGTCAATCC	2
CTGTCAATATC	2
CTGGTTTAGTA	2
CTGGCATTTCA	2
CTGGCAATCGC	2
CTGGGTTAGCA	2
CTGGCCTTAAA	2
CTGGCCAAGTT	2
CTGACAAATGT	2
ATGACTTAAAA	2
CTGCCCGTGGA	2
CTGACAATATA	2
CTGACAAGAGA	2
CTGCAAAACAT	2
CGGTCGACCGG	2
CTGCAAAACGG	2
CTGCCGCTGCT	2
CTGAACAATGG	2
CTGCCTTTGTA	2
CTGCGACCTAC	2
CTGACGTATGC	2
CTGACTGCACT	2
CTGCGCACGCA	2
CTACACGTGAT	2
ATGACGAAGGG	2
CTATGTGGGGC	2
CTGCCCTTTCG	2
CCGTCATATCG	2
CTGCCGTAAAG	2
CCGGGTATAAG	2
CTGCCTTAGGC	2
CTGACAGTGCC	2
CTGACGAGGCT	2
CTGACAGTTCG	2
CTGACAAAGGA	2
CTGACATAAAA	2
CTGCCAGATCG	2
CTGCACGTAAT	2
CTGCCAGCGCT	2
CCGTGTTTATT	2
CTGAGAAAGCC	2
CTGCATAAAAT	2
CTGCGCACTCG	2
CTGACATAGTG	2
CTGCCCATGGG	2
CTGCATTATCG	2
ATGAAAAAAAT	2
CTGAACTAATA	2
CTGCCGAAGAA	2
ATGTGAAACGT	2
CTGCCGCTGTC	2
CTAGGAAACTA	2
CTGAGAATTTT	2
CTGCATTTGAC	2
CTGCCTGGAAC	2
CTGACCAAACA	2
CTGCCTTTGCG	2
CAGTGCAATGC	2
CTGACGAATGG	2
CTGCCAAACAA	2
CTGACGATTCA	2
CTGAGAAATTC	2
CTGCAAAAATG	2
CTCTGAAACGG	2
CTGACACGAAA	2
CTGACTTATCG	2
CTGTGGAACCC	1
CTGGCAATACA	1
CTTAGCAAGCC	1
CTGGGCAACGT	1
CTGTGAGGGGC	1
CTGTACTGATC	1
CTGTTAAACGT	1
CTGTACTTACC	1
GTGCACGTGAT	1
CTGGGCAACTA	1
CTGGCACATCC	1
CTGTAGAGAAA	1
CTGTAAAAAAA	1
CTGTATAATCC	1
CTGGACAAGGA	1
CTGGATTAGTA	1
CTGTAAGATCC	1
CTGTATATCAT	1
CTTGGTTAGAA	1
CTGTATTTTCA	1
CTGTACATAAT	1
CTGTCAAAACC	1
CTGTGAAACTT	1
CTGTCAAAAGG	1
CTGCGTGTCAT	1
CTGGGCAAGCC	1
CTGGCGCTCCC	1
CTGGCGTCCAC	1
CTGGCAGTCTT	1
CTGGCTACCAG	1
CTGCGCGTGAT	1
CTGTCAACCTT	1
CTGTGTTTTCC	1
CTGTCAACTCA	1
CTGTTCAAAAT	1
CTGTCAAGACA	1
CTTACAGAAAA	1
CTGGAAAAGGT	1
CTGTAATATCC	1
CTGGGGTAGTA	1
CTGGCATTGTA	1
CTGTCACATCG	1
TGCGACTGTGT	1
CTGGGTAAAAG	1
CTGGCCAAGCA	1
CTGGGTAAGTA	1
CTGGCGAGACA	1
CTGCGTTATCG	1
CTGGTACGTCT	1
CTGTCAGATCC	1
CTGTGAAATTT	1
CTGTCAGCCGG	1
CTGCGTTAGTA	1
CTGTCAGGCGT	1
CTGGTTATAAG	1
CTGCTCACGCG	1
CTGGCAGCACT	1
CTGTCATAACG	1
CTGGCGGAACA	1
CTGTCATAGTT	1
CTGGAAGCTAC	1
CTGTCATATCA	1
CTGGCGTAGAC	1
CTGTCATATCC	1
CTGGACAAGAC	1
CTGCTCGGGAG	1
CTGGCATCACC	1
CTGGGTATAGG	1
CTGTTAAAAGG	1
CTGGGTATATG	1
CTGTAAAGTCC	1
CTGTCATTCGT	1
CTGTTCCCGCG	1
CTGGCTATTCT	1
CTGTTGACCGT	1
CTGGGTCTAAG	1
CTTACTTAAAA	1
CTGGATTTATA	1
CTTCCATAGGG	1
CTGTCCAAGAT	1
CTGGGACTTTT	1
CTGTCCAATGC	1
CTGGCGTCACT	1
CTGGGTGAGTA	1
GCGGCCACATA	1
CTGGCTTACGT	1
GTGTAAAATCC	1
CTGTCCATACA	1
CTGGCCAAAAA	1
CTGTCCATGAA	1
CTGTACCTAGC	1
CTGTCCCAAAT	1
CTGGGAAACTT	1
CTGGAAAAGTC	1
CTGGCAATCCT	1
CTGGCCTATTT	1
CTGGCAATCTA	1
CTGGGTTAATA	1
CTGGTACATTC	1
CTGGGAAAATA	1
CTGGCACAGTC	1
CTGGGTTAGAA	1
CTGGCACATGT	1
CTGTCGAAGTC	1
CTGGTCAAACT	1
CTGTCGAATCA	1
CTGGAAAACTA	1
CTGGCAAAAGA	1
CTGGCACTCTC	1
CTGGGAAACAA	1
CTGGTGTGTGG	1
CTGTCGATTTG	1
CTGGTTTAATT	1
CTGTCGGTTTG	1
CTGTGCAATGA	1
CTGTCGTATCG	1
CTGGCAGGAGA	1
CTGTCGTATTT	1
CTGGAAGAGGA	1
CTGTCGTCCGT	1
CTGGGAATTCT	1
CTGTCGTTACC	1
CTGTGCTAACC	1
CTGTCGTTGGC	1
CTGTGCTTATC	1
CTGTCTAATCC	1
CTGGCATAAGT	1
CTGGGTTAGGA	1
CTGTGGGTGCA	1
CTGTCTACTAT	1
CTGGCATACGG	1
CTGGCCGTCCT	1
CTGTGTATAAG	1
CTGGCAAAGAC	1
CTGGCATATTG	1
CTGTCTATCCC	1
CTGCGGACCCC	1
CTGTCTATCGT	1
CTGTAAAATGT	1
CTGGGTTAGTC	1
CTGTAAACTCC	1
CTGTCTATGGT	1
CTGTTAAATGT	1
CTGGCAAAGGC	1
CTGTTATATCG	1
CTGGCAAATAC	1
CTGTAAATTCC	1
CTGGCCAATAC	1
CTGTTCGAATC	1
CTGTCTCTACG	1
CTGTTGACCGG	1
CTGGGTTATTA	1
CTTACAATCGG	1
CTGCGTATTTT	1
CTTACGAAGGT	1
CTGTCTGTTGT	1
CTGGCATTCTC	1
CTGTCTTATCG	1
CTGTAAGTTTG	1
CTGTCTTCAAC	1
CTTCGGAACCC	1
CTGGCGAAGTC	1
CTTGCAAGTTC	1
CTGCGGAACCA	1
CTTGGTATAAG	1
CTGTCTTGGTG	1
CTGGACAATTG	1
CTGCTAATGTT	1
CTTTCTATTCC	1
CTGGCAAATTC	1
CTTTGCAATGC	1
CTGTCTTTGGT	1
GTGCAAAAAAT	1
CTGTCTTTGTT	1
CTGTACAATCC	1
CTGGCAACAAT	1
GTGTGAAACGG	1
CTGGGTTTGGT	1
CTGGGAGAGTT	1
CTGTGAAAAGT	1
TTGCACGTGAT	1
CTGTGAAAATG	1
TTGGAAAAGGA	1
CTGGCAAGCTC	1
TTGTCATATCG	1
CTGTGAAACCG	1
CTGTACGAAAT	1
CTGGAAAAAGA	1
CTGTCCAAACG	1
CTGACCGAGCA	1
CTGCACAAAAG	1
CTGCCTACTTG	1
CTGACTTACAA	1
ACGTACAAAAA	1
CTGACTTACGT	1
ATGGCGAAACA	1
ATGGCAAATGC	1
ATGGAAAAGGA	1
CCGACAGAATA	1
CTGCAGTTAGT	1
ATGCCAATTGT	1
CTGCCAATCAG	1
CTATGATACGG	1
CTGCCATTGAA	1
CTGACTTTTTA	1
CTGCCGAATCT	1
ATGACAGAAAA	1
CTGCCTTACTA	1
CCGACAGGAAA	1
CTGACAGTAAA	1
CTGAGAAAAGA	1
CTGCACGTCAT	1
CTGAGAAAAGG	1
CTGCATGTGAT	1
CCGACCAAAAA	1
CTGACCAAATC	1
CTCAGAAATGT	1
CTGACCAATCA	1
ATGTGGAACGG	1
CTGACCTTAAT	1
CTCGCAAATGC	1
CTGACCTTCTG	1
CTGAGAAACTG	1
CTAGAAAAGGA	1
CCGAGATAATT	1
CTGACGATCGG	1
CTGAGAAAGGA	1
CTAGGTATAAG	1
ATGTGTTTATT	1
CTGCCTTTGTC	1
CTGAAAAAGGA	1
CTATCATATCG	1
CCGCCATAGGG	1
CTGACAGTGAT	1
CTGAAAATTGG	1
CTGCACATGTT	1
CCGCCGAATTT	1
CTGCACGTTAT	1
CCGCGCACGCG	1
CTGCATGCCAT	1
CCGCGGAACCC	1
CTGACATTAGT	1
ATGACAGAATA	1
CTGACCAAAAT	1
CCGGAAAAGGA	1
ATGTCTATTCC	1
CCGGCACATTC	1
CAGTAAAATCA	1
CTGAGAACTCC	1
CTGCCAGATGC	1
CTGAGAACTGG	1
ATGATAAATGT	1
CTGAATATAGT	1
CTACAAATGTT	1
CTGAATGAGGT	1
CTGCCCAAACC	1
CCGGCGAAACA	1
CTGCCCGGGGG	1
CTGAATTTTGG	1
CTGCCCTAGGT	1
ATTTAAAATAA	1
CTGACGAGGGG	1
CTGACAAAGAC	1
CTGCCGAATTA	1
ATGACATAGTG	1
CTGCCGGCGTT	1
ATTTGAAACGG	1
CTGACGGGAAA	1
CTGAGCAACGC	1
CTGCCTGTAAG	1
CACCAAAAAAT	1
CTGACTACCTA	1
CTGAGCAAGTC	1
CTGCGAAAAAC	1
CTGAGCAATGC	1
CTGCGAATGTT	1
CTGACAACAAA	1
CTGACTTAATA	1
CTGAGCATACG	1
CTGACAGTCCG	1
CTGAGCATTCC	1
CTGCAATAGGG	1
CTGAGCGGTCT	1
CGGAGACATGT	1
CCGTACAAAAT	1
CAGCCCTTTGT	1
CTGACAACTTA	1
ATGAGAAATCT	1
CTGAGGAATTC	1
CAGGCAACACT	1
CACCATACTCC	1
CGGGGAATTTT	1
CTGAGTAAGCC	1
CAGGGAAACTA	1
CTGACAAGAAA	1
CTGACATGAAA	1
CTGAGTGATGT	1
CTGACATTTGG	1
CTGAGTTAGTA	1
CAGGGTATAAG	1
CTGAGTTAGTT	1
CTAACTTAAAA	1
ATGTAAAATCA	1
ACGTCAAAGAT	1
CTGATAAATCT	1
CTGCCAATAAG	1
CTGACAAGAGC	1
CTGCCAATCTG	1
CTGATAGAAAA	1
CTGCCAATGTT	1
CTGATATAATT	1
CTGACCAGGCA	1
CTGATCACAAT	1
CTGACCCTGAT	1
CTGACAATAGA	1
CTGCCAGCGTC	1
CTGATCTATCC	1
CTGACCGCGAT	1
CTGATCTATTA	1
CTGACCTTATA	1
CTGATCTTACC	1
CTGCCATTACT	1
CTGATCTTATT	1
CTGACCTTCTC	1
CAGAGAAATTT	1
CTGCCCAAAGG	1
CTGATTTTTTT	1
CTGCCCCATAA	1
CTGACAATCCG	1
CTGCCCGTGAT	1
AAGCCAAAATT	1
CTGCCCTACGA	1
CTGCAAAAAAG	1
CTACCAGCGTT	1
ATGGCCCAATG	1
CTGCCCTTTGT	1
CTGCAAAAACT	1
ATGCACGTGAT	1
CCTCAAAAAAT	1
CTGCCGAATGC	1
CTGACACTATT	1
ATGCAGAAAAT	1
ACGACAAAAAT	1
CTAGACAAGTC	1
CAGCACGTGAT	1
CAGTAAATTCA	1
CTGACAGAAAT	1
CTGCCTATGGA	1
ACGACAAAGAT	1
CTGCCTCAGGA	1
CTGCAAAATAA	1
CTGACTAAGGG	1
CTGACAGATAA	1
CTGCCTTAAGG	1
ACGACTTAAAA	1
CTGACTACATA	1
CTGCAAAATTC	1
CTGCGCACGCT	1
CTGACAGCGTT	1
CTAGGTTAGTA	1
ACGAGTTAATA	1
CTGACTCTTTT	1
CGGAGAATTGT	1
CTGACTGTGAT	1
CTGCAAATATT	1
ATGAAAATGTT	1
CTGCAAATGTA	1
CTGCGCAAGCG	1
ATGACTTTTTT	1
CTGCAAATTTT	1
ATGCATTTTGG	1
CTGACTTCTTT	1
CTGACTTTATC	1
AAGACAATAGT	1
CTGACTCAAAA	1

## Sheet: GanCas9 PAM_counts
7mer	counts number
CTGACTTAAAA	63362
CTGTCATATCG	47648
CTGACAAAAAA	22134
CTGTACAAAAA	21865
CTGACCTTATC	16355
CTGCCATCTTC	10200
CTGACAGAATA	9011
CTGGCTTACGT	8663
CTGCCAGATGC	8478
CTGTCACATCT	8367
CTGCCTCAGGA	7107
CTGGCCGACCT	6157
CTGTCCAAATT	6018
CTGGTCAAACT	5805
CTGTCTTCCAA	5515
CTGCCTTAGGC	5454
CTGCCTTTGTC	5384
CTGTTCTTAAA	5024
CTGGCAAAAGC	4918
CTGTGCATACA	4901
CTGACATAGTG	4779
CTGACGGAGTT	4478
CTGACCAAGCT	4309
CTGAGCTTACG	4263
CTGACAGTCCG	4255
CTGTCACATCG	4241
CTGTCCAATGG	4130
CTGAACAAATT	3923
CTGACCATATC	3789
CTGGCTTAGAC	3673
CTGTCATCCGC	3641
CTGTACTTACC	3621
CTGCCTTAAGG	3593
CTGTCATCAAA	3538
CTGTCTACTAT	3535
CTGTCCAAGAT	3493
CTGGCATATTG	3484
CTGGCCTACTT	3376
CTGGCAAATGC	3306
CTGACAGAAAG	3260
CTGACACGAAA	3196
CTGGCATTGCT	2945
CTGAGCATACG	2740
CTGCCGAATTT	2657
CTGTCCAACTT	2571
CTGCCTCCAAC	2552
CTGACAAAGGA	2514
CTGTCTGCCGG	2454
CTGTTCAAAAT	2417
CTGCCAGACAC	2328
CTGTCCTATCG	2293
CTGGCAGCGGG	2285
CTGTCATTTTT	2282
CTGGCAAAAGT	2253
CTGAGCGTACC	2243
CTGGTCTAACG	2142
CTGACGTATGC	2102
CTGGCACAGAC	2094
CTGACATACAC	2093
CTGCGCAAACA	2084
CTGGCATCTAT	2068
CTGTGCTAACC	2047
CTGTTCTAAGC	2032
CTGAACTAATA	1981
CTGTCATAGTT	1968
CTGACTTAGGT	1963
CTGTCTATACG	1888
CTGATCATAGG	1839
CTGGCTACTTC	1825
CTGATCTTATC	1796
CTGGGCTTACG	1786
CTGTACTGATC	1784
CTGTCAGATCC	1780
CTGCCCTAGAG	1764
CTGTCGCACCG	1694
CTGGCAAATGT	1675
CTGACTTACAA	1598
CTGTCGTAGAA	1581
CTGACTTATCG	1577
CTGATCTTATT	1566
CTGATCACAAT	1530
CTGCCTTACGA	1514
CTGGCATATCC	1461
CTGTGCTTATC	1454
CTGCCCTAGGT	1375
CTGTCAGCCGG	1355
CTGTCAAGCAC	1346
CTGGCCTATCT	1323
CTGTCCTATTC	1311
CTGACATACGG	1252
CTGCCTTACTA	1243
CTGTCGAATCA	1226
CTGCCAGATCG	1150
CTGGCGTACGA	1089
CTGATCTTACC	1080
CTGTTCGAATC	1041
CTGACCAAAAA	1035
CTGTCCTTATA	1032
CTGTCATAAGC	1002
CTGTGCATATA	986
CTGGCATTCTC	979
CTGCACTTATA	977
CTGTCGAAAGG	946
CTGGTCTAAGT	910
CTGTCTGTCTC	884
CTGACAAAACC	825
CTGGCACAATT	822
CTGACATCATA	808
CTGCCGTAAAG	805
CTGTCAGAGTT	794
CTGGCAAAGAC	737
CTGTTCTTACG	733
CTGTACAAAAG	686
CTGTACCTAGC	674
CTGGCAGATCC	640
CTGCCAAGTAT	639
CTGTCAGAAGA	611
CTGACAACTTA	606
CTGGCCTATTT	602
CTGGACTAAAG	601
CTGCCCAATTT	591
CTGTCTTACTG	584
CTGACATAAAC	556
CTGTCACAGAA	549
CTGGCCATGGT	548
CTGCCTTACTG	540
CTGGCCAATAC	508
CTGGCAACACT	501
CTGGGAATTTT	486
CTGTCTTATGC	456
CTGTCCTAAGC	450
CTGCCATATAT	438
CTGACGAATGT	424
CTGTCGTATTT	374
CTGTACTTAGG	338
CTGCTCTAACG	335
CTGTCAAATCC	320
CTGGCTTCTTC	293
CTGTCTTCAAC	256
CTGCCATCCCG	254
CTGGCATACGC	237
CTGTCATCTTG	82
CTGAACTAAAA	70
CTGGTATACGC	61
CTGACTTAAAG	55
CTGTCATATCT	54
CTGTCATATCA	37
CTATACAAAAA	34
ATGACTTAAAA	28
ATGGCATATCC	28
CTATCATATCG	26
ATGTCATATCG	26
CTGACTTAAGA	24
CAGTCGCACCG	24
ATGTCAAGCAC	24
CTGACAAAAAG	23
CTAACTTAAAA	22
CTGTTATATCG	20
CTGTCATATTG	20
CTGACTCAAAA	20
CTGACTTAGAA	20
CCGTCATATCG	20
CTGGCTTAAAA	18
CTGACATATCG	18
CCGACTTAAAA	18
CTGACATAAAA	17
CTGTCATACCG	16
CTGACTTAATA	16
CTGTCTATTTG	15
CTGCAAAAAAT	15
CTGCCATATCG	14
CTGCGCACGCG	14
CTGACTAAAAA	14
CTGACAAGAAA	14
CTTACTTAAAA	13
TTGTTCTTAAA	13
CTGTCGTATCG	13
CTGACAGTCCA	13
CTGACATTATC	13
CTGACTTACGT	12
CTGACAAAGAA	12
CTGAATTAAAA	12
CTGTTACATTA	11
CTGTAATATCG	11
CTGCATTTGTC	11
CAGACTTAAAA	11
CTTTCATATCG	10
CTGTCACATCA	10
CTGTCATCTTC	10
CTGATTTAAAA	10
CTGACCTAAAA	10
CCGACAAAAAA	10
CTGTCATATAG	9
CTGTATATAAT	9
CTGTATAAAAA	9
CTGACTTGAAA	9
CTGATAAAAAA	9
CTGACCTTATA	9
CTGACAGAAAA	9
CTGTCTATTCC	8
CTGTGAAACGG	8
CTGGCTATAAC	8
CTGCCTTAGTC	8
CTGCATTTTGG	8
CTGACTTAAAT	8
CTGACGTAGTT	8
CTAACAAAAAA	8
ATGACAAAAAA	8
ATGTACAAAAA	8
ATGTCTTCCAA	8
CAGTCATATCG	8
ATGGCCTACTT	8
CTTAACAAATT	7
CTTTACAAAAA	7
CTGTCTTACGT	7
CTGTCTTTATT	7
CTGTCATGTCG	7
CTGTCCAAAAA	7
CTGTACAAAAC	7
CTGGTTTTGCG	7
CTGGCCGACCC	7
CTGGAGTATGT	7
CTGCCTTTGTT	7
CTGCAATCTTC	7
CTGCCAATTGT	7
CTGACGGCCCA	7
CTGACTTAAAC	7
CTGACTTATAA	7
CTGAGAAATGT	7
ATGCCATCTTC	7
CCGTCAGATCC	7
CCGTCATTTTT	7
CCGTACAAAAA	7
ATGTCCAAATT	7
CTGTCTGCCTG	6
CTGTTCTTGAA	6
CTGTGGCCAGT	6
TTGTCATATCG	6
CTGTCCGAATT	6
CTGTCGCATCG	6
CTGTCAAAAGC	6
CTGTCAAATCG	6
CTGTCCAAATC	6
CTGTCGTACCG	6
CTGTACAAAGA	6
CTGGCCCAATG	6
CTGTACACAAA	6
CTGTACAGAAA	6
CTGTACGTGGT	6
CTGTACTAAAT	6
CTGGGTTTATT	6
CTGCCTTAAGT	6
CTGGCAAGTTC	6
CTGCGTCTCCA	6
CTGCCATATTC	6
CTGCCTTTGTA	6
CTGGCAAATAC	6
CTGCCTTATGC	6
CTGATAGAATA	6
CTGAGGGTGCA	6
CTGCAGCCACA	6
CTGAGATAATT	6
CTGACCAATCT	6
CTGAAAATGGC	6
CTACCATCTTC	6
CTGACAGGATA	6
CTGACCTAATC	6
CTGACAATAAA	6
CCGTCTTCCAA	6
CCGCCATCTTC	6
ATGTGCATACA	6
ATGACATAGTG	6
CTGTCTGTACT	5
CTTACAAAAAA	5
CTGTGGTTTGT	5
CTGTCAGATGC	5
CTGTCAAAATT	5
CTGTCGGCCCA	5
CTGTCATATCC	5
CTGTCATCCAC	5
CTGTCCAAAAT	5
CTGTACAAAAT	5
CTGGCCGACCA	5
CTGGCCTTAAA	5
CTGGCTTATGT	5
CTGCCATCCTC	5
CTGCGTTCTGT	5
CTGGCAAAGGT	5
CTGCCTTAGGA	5
CTGCCAGATAC	5
CTGGCAAATGA	5
CTGCACAAAAA	5
CTGCATTTAGT	5
CTGATATACAC	5
CTGACTTAACA	5
CTGACTTCAAA	5
CTGACCTCATC	5
CTGCACGTGAT	5
CTGACCTTATT	5
CTGACGAAAAA	5
CTGAATTTAGT	5
CTGACATCTTC	5
CTGACATATTG	5
CTGAAAGAATA	5
CTGACCAAACA	5
CTGACAATCCG	5
CTGACATAGTA	5
CTGAACAAAAA	5
CTGACATCCGC	5
CTGACAGAATG	5
CTGACAAAAGC	5
CTGACAGACTA	5
CTGACCAAGCA	5
CTGAACTTATC	5
CTGACCCTATC	5
CGGTCATATCG	5
ATGGCCGACCT	5
CCGTTCTTAAA	5
CTGTCTTCCAG	4
CTGTGTTAACC	4
CTGTCTATACT	4
CTGTCTCAGGA	4
TTGGCTTACGT	4
CTGTGCATTCA	4
CTGTCTTCCGG	4
CTTTCCAACTT	4
CTGTGCAAAAA	4
CTGTGTCTCCA	4
TTGCCTTAAGG	4
CTGTCTAAATT	4
CTGTCACATCC	4
CTGTCCTATGC	4
CTGTCCAGTGG	4
CTGTCATAACG	4
CTGTCATCCGA	4
CTGTCCAGCTT	4
CTGTCATCAGA	4
CTGTCCAATGT	4
CTGGCTTACGC	4
CTGTACCCCTT	4
CTGTACATACA	4
CTGGCCTACTA	4
CTGGCCTTATC	4
CTGGCCGATCT	4
CTGTACATAAA	4
CTGGTATTGCT	4
CTGTACCAAAA	4
CTGGCTTACTT	4
CTGTACGAAAA	4
CTGTACAAATT	4
CTGGCTTACGA	4
CTGGCTTAAGT	4
CTGTACTTACA	4
CTGCCTTTATC	4
CTGCTATCTTC	4
CTGCCATCTTA	4
CTGCCGGATGC	4
CTGCCATCATC	4
CTGCCTTTTTC	4
CTGCGTGCTTG	4
CTGCCTCTGTC	4
CTGCTAGTGTG	4
CTGCCTTAAAA	4
CTGGACAAGTC	4
CTGCGGGGCAT	4
CTGGATGGGAA	4
CTGCGTCCGTG	4
CTGCCAGGTGC	4
CTGGCACATTC	4
CTGGCACATAC	4
CTGAGCCTGGG	4
CTGACTTTAAA	4
CTGAGACGCCC	4
CTGCATTCTCC	4
CTGAGCGTATC	4
CTGAGCGTCAG	4
CTGACGTAAAA	4
CTGATCATATC	4
CTGACTGAAAA	4
CTGATCTTAAC	4
CTGCATGCGAG	4
CTGACTTAGCC	4
CTGACTATGTA	4
CTGCCAAATGC	4
CTGATCAGGAT	4
CTATTCAAAAT	4
CTGACAGATGC	4
CTATCCAAATT	4
CTGACACAAAA	4
CTGAAAGTCGC	4
CTATCCAATGG	4
CTACCTCAGGA	4
CTGACACAGAC	4
CTGACATACGT	4
CTATCTTCCAA	4
CTGACATACAA	4
CTAACAGAATA	4
ATGAACTAATA	4
ATGACATACAC	4
ATGACAGAATA	4
CGGTCACATCT	4
CCGGCAAAAGT	4
CCGTGCATACA	4
ATGTCACATCG	4
CCGTCTATACG	4
ATGTCATCCGC	4
ATGTCTACTAT	4
ATGGCACAGAC	4
ATGTTCTTAAA	4
ATGACCTTATC	4
ATGGCTTAGAC	4
CAGACCTTATC	4
CTGTGCATGCA	3
TTGACAAAAAA	3
CTTCCAGATGC	3
CTGTGCAAACA	3
CTGTTCTGAAA	3
CTGTGCATAAA	3
CTGTGACATCC	3
CTGTGTTTATT	3
CTGTGCTAACA	3
CTGTGTTTTTT	3
CTGTCTATGAA	3
TTGCCATCTTC	3
CTGTTCTTAAT	3
CTGTGAATACA	3
CTGTTGATTAT	3
TTGTCACATCT	3
CTTACCTTATC	3
CTGTTCATAGG	3
CTGTCTTCAAA	3
TTGTACAAAAA	3
CTGTGCTTACG	3
CTGTCTATTTT	3
TTGACTTAAAA	3
CTGTCTGGCCT	3
CTGTTCTATGT	3
CTGTTACATCT	3
CTGTCTTAAGA	3
CTGTCTGCAGG	3
CTGTCGTATAA	3
CTGTCGCATCT	3
CTGTCGATTCA	3
CTGTCTACTAC	3
CTGTCATCCTC	3
CTGTCCTATCT	3
CTGTCACCCCC	3
CTGTCCAAGCT	3
CTGTCAAAAAA	3
CTGTCAAAGAT	3
CTGTCGGATGT	3
CTGTCAGCGGG	3
CTGTCAGATCG	3
CTGTCCTTGTA	3
CTGTCAGCCGT	3
CTGTAGAAAAA	3
CTGTCAGACGG	3
CTGTAGACGTG	3
CTGTATACGCT	3
CTGGCCCATTT	3
CTGTAAAAAAA	3
CTGGTTTTAAA	3
CTGTACTAACG	3
CTGGCGAATGC	3
CTGTACAAATA	3
CTGGTTTACGT	3
CTGGCATTACT	3
CTGGCGAAAGC	3
CTGTACAAGAA	3
CTGGCGAAGTT	3
CTGGCCGACCG	3
CTGGCGTGCAT	3
CTGGCATACAC	3
CTGGGCTTACT	3
CTGGGACTACG	3
CTGCCTTACAA	3
CTGCCATCCCT	3
CTGGCAGACCT	3
CTGCCCAATGG	3
CTGCGCTGTCG	3
CTGCTAGACAC	3
CTGGCAAAAAA	3
CTGCCTGGAAC	3
CTGCCGACTTT	3
CTGCCCTTATA	3
CTGCCCAAATT	3
CTGCCTTAATG	3
CTGCGACTATT	3
CTGCGCAAATA	3
CTGGCAGAATA	3
CTGCACTAAAT	3
CTGACTTTATC	3
CTGATATAGTG	3
CTGAGACCGGA	3
CTGACGGATTT	3
CTGATCATAGT	3
CTGATAGTCCG	3
CTGAGCTTAAG	3
CTGACCTAGGG	3
CTGACTTAACG	3
CTGCCAAACAA	3
CTGACTTAGAC	3
CTGATAGAAAG	3
CTGAGCTTGCG	3
CTGACGATTCA	3
CTGACTACTTC	3
CTGCCAACTTC	3
CTGATGGAGTT	3
CTGCATTGCGG	3
CTGAGCATACA	3
CTGCATTTGAC	3
CTGACCTTAAC	3
CTGACGAGTGC	3
CTGCAAGATGC	3
CTGAGCAAGCC	3
CTGAGTTTTAC	3
CTGACGAAGGG	3
CTGAGAGGACG	3
CTACCTCCAAC	3
CTGACAAAATA	3
CTGACAGAACA	3
CTGACCTACAC	3
CTGACAAATGC	3
CTGACATACTG	3
CTGACAAAGCT	3
CTGACACCAAC	3
CTGACAAAGTG	3
CTGACAAAAAC	3
CTGAAAAAAAA	3
CTGACAGAGTT	3
CTGACCAAGCC	3
CTGACAGATCC	3
CTGACCAAGTA	3
CTGACAACCAA	3
CTCTCATATCG	3
CTAGCAAAAGC	3
CTGACCGTCCA	3
CTAAGCGTACC	3
CTGAACCCTCA	3
CTGAACTTACC	3
CTGACAATATC	3
CTGACAAATAA	3
ATGAGCATACG	3
CCGGCCGACCT	3
CGGACCTTATC	3
ATGTTCTAAGC	3
CCGTCACATCT	3
ATGGCAAATGC	3
ATGACAGTCCG	3
CAGCCAGATGC	3
CCGGCATATTG	3
CAGTCCAAATT	3
CCGGCTTAGAC	3
ACGACTTAAAA	3
CCGTCATAGTT	3
CCGAACTAATA	3
ATGATCACAAT	3
CCGACAGAATA	3
CGGACATAGTG	3
ATGACCAAGCT	3
CCGCCTTTGTC	3
CCGACAGAAAG	3
CTGTTATAGTT	2
CTGTGAGAGTT	2
TTGTCATCCGC	2
CTGTCTTAAAA	2
CTTGCAAAAGT	2
CTGTGGGTATC	2
CTGTGATATCG	2
CTGTCTGCCGA	2
CTGTTCGAATA	2
CTGTTCTAAGT	2
CTGTGCGCTTG	2
CTGTCTGTTAT	2
CTTGCAAATGT	2
CTGTTCTCAAA	2
CTGTTATCTTG	2
CTGTGAAATCA	2
TTGACAGTCCG	2
CTGTTCTGAGC	2
CTGTGCTAGCC	2
CTGTCTATATG	2
CTTACCAAAAA	2
CTGTGTGCTTG	2
CTGTCTGTATC	2
CTGTCTGCCGT	2
CTTCCTTTGTC	2
CTGTTCTTACT	2
CTTGCAAATGC	2
CTGTTCTTATC	2
CTTGTCAAACT	2
CTGTCTTCTAA	2
CTGTTATCCGC	2
CTGTCTTCCCG	2
CTTTCCTATCG	2
CTGTTGCTTCG	2
TTGACAGAATA	2
CTGTTTACTAT	2
TTGACGTATGC	2
CTGTCTTATCG	2
TTGATCACAAT	2
CTGTGCATGTA	2
CTGTTCCTGAT	2
CTTACAAAGGA	2
CTGTCTTTCTC	2
CTTACAGAATA	2
CTGTTCGAGTC	2
CTGTTCAAGAT	2
CTGTCTACTGT	2
CTGTTCTAAAA	2
CTGTCACGCCC	2
CTGTCGAGTCA	2
CTGTCTACCAT	2
CTGTCCAGATT	2
CTGTCACATTG	2
CTGTCAAATGG	2
CTGTCAGTCCG	2
CTGTCCAGGAT	2
CTGTCGACCGT	2
CTGTCATAAGT	2
CTGTCGCACAG	2
CTGTCCCTAGG	2
CTGTCAAATGC	2
CTGTCAAAATC	2
CTGTCACATTT	2
CTGTCCGCCTG	2
CTGTATTTACC	2
CTGTCACAACT	2
CTGTCGAATTT	2
CTGTCCTACTT	2
CTGTCGAGGGA	2
CTGTCCTAGGC	2
CTGTCCAAAAG	2
CTGTCAGCAGG	2
CTGTCGCACCC	2
CTGTAGGGTCG	2
CTGTCATATTT	2
CTGTCATTCGC	2
CTGTCATAGTC	2
CTGTCATTCGT	2
CTGTCAAGTAC	2
CTGTCATTCTC	2
CTGTCAATATC	2
CTGTCATTTTC	2
CTGTCATCCCT	2
CTGTCAAACAC	2
CTGTCTACAAA	2
CTGTCATACGG	2
CTGTCCAATTT	2
CTGTCGAATGG	2
CTGTCCAACAT	2
CTGTCATTTCT	2
CTGTAACAGAG	2
CTGGCCGACAT	2
CTGGCCTACTC	2
CTGGCCTGCTT	2
CTGGTCAAACG	2
CTGGCGGAGTT	2
CTGGCCGTCCT	2
CTGGCGTACAA	2
CTGGCATAGAC	2
CTGGCGTATTG	2
CTGGTATGCTG	2
CTGGCGTCCAC	2
CTGGTTTAGAC	2
CTGGCTAATTC	2
CTGTAAGCATT	2
CTGGCTCACGT	2
CTGGCCTAATT	2
CTGGCTGTACA	2
CTGGCATACGG	2
CTGGCTTACAT	2
CTGGTAAGGCG	2
CTGGCTTAGAA	2
CTGGTATCTAT	2
CTGGCTTAGAT	2
CTGGTCAAACC	2
CTGGCTTATAC	2
CTGGCATATTA	2
CTGGCATGTTG	2
CTGGTTTGGTA	2
CTGGCTTTGTC	2
CTGTAACTAGC	2
CTGGGACGATC	2
CTGTAATTACC	2
CTGGGCATACG	2
CTGGCATCACC	2
CTGGGCCTACG	2
CTGGCCTACGT	2
CTGGCATATCG	2
CTGGCCTACTG	2
CTGGGTTTACT	2
CTGTACCCGTG	2
CTGGTAAAAGC	2
CTGGTAAATGC	2
CTGGTAGAAAA	2
CTGGACTATTT	2
CTGCCACCAAC	2
CTGGCAAAATT	2
CTGCCACCTTC	2
CTGGAATCTAT	2
CTGCCATCTTT	2
CTGGATTACGT	2
CTGCCATAGAG	2
CTGCCCTTTGT	2
CTGCGCAAACG	2
CTGCCGAATTC	2
CTGCCTAAGGC	2
CTGGACGGGGA	2
CTGCCATATGC	2
CTGGATATGCG	2
CTGGCACTGCT	2
CTGGCAAAAAC	2
CTGCCTATGGC	2
CTGGCAAAGGC	2
CTGCCTCAAAC	2
CTGCCATCCGC	2
CTGCGTAAACA	2
CTGCCAGATGA	2
CTGCCTCAGAA	2
CTGCCTTTGAC	2
CTGCCTCAGTA	2
CTGCCAGACAT	2
CTGCCTCATGA	2
CTGGACTAAGG	2
CTGCGTGGAAT	2
CTGCCCTAGAT	2
CTGCCTCCGAC	2
CTGCCCTAGGC	2
CTGCCCATACT	2
CTGCCATTTTC	2
CTGCCCGATCG	2
CTGCCAGATCA	2
CTGCCCGTGGA	2
CTGCCATCCCA	2
CTGCTATTATC	2
CTGCCACATCT	2
CTGCTCAAACA	2
CTGCCAGATGT	2
CTGCTCCTTAT	2
CTGGCAAGAGC	2
CTGCTCTTAAA	2
CTGGCACAATA	2
CTGCTTCGACC	2
CTGCCTTCGTC	2
CTGCTTCTTTT	2
CTGGCACTCTA	2
CTGGAAAAAGT	2
CTGGAAAAGGA	2
CTGCGCATACA	2
CTGCCTTTCTC	2
CTGAGTACTAC	2
CTGAGCTAATA	2
CTGCCAAATTT	2
CTGACGGAATA	2
CTGCATCAGGA	2
CTGATCACGAT	2
CTGACTTTCGG	2
CTGACGGAATT	2
CTGACCTTACC	2
CTGACGGAGCT	2
CTGACTTCCAA	2
CTGACGGAGTC	2
CTGACTTGCAA	2
CTGACCTACTT	2
CTGACGAAACC	2
CTGATCGCGGT	2
CTGACTTTTTT	2
CTGATCTCCCC	2
CTGCCAAGCAC	2
CTGAGCAAATT	2
CTGACTTATCT	2
CTGACTCAGGA	2
CTGACGAATTT	2
CTGATCTTACG	2
CTGACGGGCTA	2
CTGACGAAGGT	2
CTGCATGAGAA	2
CTGACTGAGTT	2
CTGCATTAGGC	2
CTGATGATAAA	2
CTGAGTTTCTG	2
CTGAGCATACT	2
CTGACCTGATC	2
CTGATTATAGG	2
CTGACTTTGTC	2
CTGAGCATATC	2
CTGACGGAAAG	2
CTGACTTAGTT	2
CTGACGTATGT	2
CTGCAAATGTT	2
CTGATCACAAA	2
CTGACTGCCGG	2
CTGCCACAGGA	2
CTGACATAGAG	2
CTCACTTAAAA	2
CTGAAATAGTG	2
CTGAACAGATT	2
CTGACAGTTCG	2
CTGAACCAATA	2
CTGAAACTAAT	2
CTGAACCTGGG	2
CTGAACAAGTT	2
CTACCTTAAGG	2
CTGACAGTCTG	2
CTGAAGGAAAA	2
CTGACATAAAG	2
CTGAAGTATGT	2
CTGAAAATCGA	2
CTAGCTTACGT	2
CTGACATCCCT	2
CTGACAAAACA	2
CTGAACAAATG	2
CTGACAAAAGA	2
CTGACAGAGTA	2
CTATCACATCG	2
CTGACAGATCG	2
CGGTCTATACG	2
CTGACAGTGCC	2
CTGACAAATGA	2
CTCTACAAAAA	2
CTGACAACAAA	2
CTCTCTATACG	2
CTAACCTTATC	2
CTACCAGACAC	2
CTGACAAGAGA	2
CTACCAGATGC	2
CTATCCAAGAT	2
CTGACATCCAC	2
CTGACAATGGC	2
CTGACCAAGAT	2
CTGACACATCT	2
CTGACCGACCT	2
CTGACAGAATT	2
CTAACACGAAA	2
CTGACAGACAC	2
CTGAACAATTG	2
CTGACAGACCG	2
CAGACAACTTA	2
CCGTGCTAACC	2
ATGACTTATCG	2
CAGCCTTACTA	2
ACGTCATATCG	2
CAGCCTTAGGC	2
CAGACAGAAAG	2
CAGGCTTACGT	2
CCGTCTACTAT	2
CAGGGCTTACG	2
ATGTCCAATGG	2
CAGGTCAAACT	2
CAGACAAAAAA	2
CAGTACAAAAA	2
CCGTACTTACC	2
ATGAACAAATT	2
CAGACAGTCCG	2
CAGTCATCAAA	2
CCGTCCAACTT	2
ATGTCCTATCG	2
ATGCCCTAGAG	2
CAGTCCAACTT	2
CAGACGTATGC	2
ATGTCCTATTC	2
CAGCCATCTTC	2
CAGTGCATATA	2
ATGCGCAAACA	2
CCGAACAAATT	2
CCGGCTTACGT	2
ATGCCTCAGGA	2
ACTACTTAAAA	2
ATGGCATATTG	2
CCGTCACATCG	2
ATGTCATCAAA	2
ATGGTCAAACT	2
ATGCCTTACGA	2
ATGGTCTAACG	2
CCGACCAAGCT	2
CCGTCCAAATT	2
ATGGCATCTAT	2
CCGTCCAATGG	2
CCGACTTAGGT	2
ATGGCAAAAGT	2
CCGAGCTTACG	2
ATGTCATAGTT	2
CCGCCAGACAC	2
CCGTTCTAAGC	2
ATGCCTTAGGC	2
ATGGCAAATGT	2
CCGCCTCAGGA	2
CGGTACAAAAA	2
CCGCCTTACTA	2
ATGCCCAATTT	2
CAGACGGAGTT	2
CAGGCACAGAC	2
TTGGCAAAAGT	1
CTTTCGCACCG	1
CTTGCCTACTT	1
CTGTTCAAAAA	1
CTGTTACATCG	1
CTGTCTGACGG	1
CTGTGTCCGTG	1
CTGTTCAAACT	1
CTTTATACTAT	1
CTGTTCAAATC	1
GCGGCCATAAT	1
CTGTCTATTAT	1
TTGATCTTATT	1
CTGTTCAATAT	1
CTGTTATTAAA	1
TTGTCCTATCG	1
CTTGCATATCC	1
CTGTCTCAACG	1
CTGTCTTACAA	1
CTGTTCATAAT	1
CTTTCATCAAA	1
CTGTGCATACG	1
CTTTGCTAACC	1
CTGTTCCTAAA	1
GTGTCTTCCAA	1
CTGTCTTCCTA	1
TTGACGGAGTT	1
CTGTCTTAGAC	1
TTGCCTTACGA	1
CTGTCTTGGCG	1
TTGTCACATCG	1
CTGTCTTAGGC	1
CTGTGTATATA	1
TTGTCCAAATT	1
CTGTGACTGTA	1
CTGTGCCGAGA	1
CTTGCATTGCT	1
CTGTTCTAACG	1
CTTGCTACTTC	1
CTGTTCTAAGA	1
CTTTACTGATC	1
CTGTGCCTATC	1
CTTTCACATCG	1
CTGTGCCTGGG	1
CTGTCTTACCG	1
CTGTTCTAGGC	1
CTTTCTGTACT	1
CTGTTCTATCG	1
CTTTTCAAAAT	1
CTGTGCGAAGC	1
GTGACGGAGTT	1
CTGTCTGTCGG	1
CTGTTAAATAA	1
CTGTTCTCCAA	1
TTGACCATATC	1
CTGTTCTCCCC	1
CTGTTACTCGT	1
CTGTGCGTACC	1
TTGCCTCAGGA	1
CTGTGCTAAAC	1
TTGGACTAAAG	1
CTGTCTTTGGT	1
CTGTCTCCCAA	1
CTGTTCTTAAC	1
TTGTCATAGTT	1
CTGTTCTTAAG	1
CTTCCAGATCG	1
CTGTCTCATCG	1
CTTCCTTACGA	1
CTGTTCTTACC	1
CTGTCTTAAGG	1
CTGTGCTACGA	1
CTGTGTTAAAA	1
CTGTCTTTGTC	1
CTTGCATCTAT	1
CTGTTCTTATA	1
CTTGCCAATAC	1
CTGTGCTGACC	1
CTTGCCTATCT	1
CTGTTCTTATT	1
CTTGCTTACGT	1
CTGTGCTTAAC	1
CTGTGTTAAGT	1
CTGTGCTTACC	1
CTTTACTTACC	1
CTGTCTTTTTT	1
CTTTCAAGCAC	1
CTGTTGTCACA	1
CTGTGTTTATC	1
CTGTGCTTATA	1
CTTTCATCCGC	1
CTGTTTGTTGA	1
CTGTGATTATC	1
CTGTTTTGTCG	1
CTTTCTACTAT	1
CTGTCTCCAAC	1
CTTTGCATACA	1
CTTAATTAAAA	1
CTTTGCTTATC	1
CTGTGCTTGTC	1
CTTTTGCCAGT	1
CTTACAAAATA	1
GTGACAGAATA	1
CTGTCTTATGA	1
GTGTCGAAAGG	1
CTTACACGAAA	1
TCTACTTAAAA	1
CTTACAGAAAG	1
TTGACACGAAA	1
CTGTGGGCCCA	1
CTGTCTTACGC	1
CTTACAGATGC	1
TTGACCTTATC	1
CTTACAGTCCG	1
CTGTCTGTCCG	1
CTTACATACGG	1
CTGTTAGAAGA	1
CTTACATATCG	1
CTGTTAGAGTA	1
CTGTCTGTACG	1
CTGTTAGCCGG	1
CTTACCATATC	1
TTGCGCAAACA	1
CTGTCTTATTT	1
TTGGCAAAAGC	1
CTTACGTATGC	1
CTGTGCAAACC	1
CTGTGTATACA	1
TTGTACAAAAG	1
CTTACTTATCT	1
CTGTGCACACA	1
CTTAGCATACG	1
CTGTGCAGATA	1
CTTATCATAGG	1
CTGTTATTTTT	1
CTTCATTAAGT	1
CTGTTCTAACC	1
CTGTTCAATGG	1
CTGTTCATAAA	1
CTGTCGTTTTT	1
CTGTCATATTC	1
CTGTATGGAAG	1
CTGTCAGACCC	1
CTGTATAATGA	1
CTGTCATTATA	1
CTGTCCTCCGC	1
CTGTCAACCGG	1
CTGTATTGATC	1
CTGTCAGAGCT	1
CTGTCATCAAC	1
CTGTCAAGCAA	1
CTGTCGTAGTT	1
CTGTCATTCTT	1
CTGTCTACACG	1
CTGTCATTGCT	1
CTGTCCTTATC	1
CTGTACTTATC	1
CTGTCGAATAA	1
CTGTCAGATAC	1
CTGTCATATGC	1
CTGTCAGATCA	1
CTGTCGCAACG	1
CTGTAGTCCAC	1
CTGTCATCAAT	1
CTGTCAAGCCC	1
CTGTCACTCCC	1
CTGTCAGATCT	1
CTGTCGTGCAT	1
CTGTCCAAACG	1
CTGTCTAATAT	1
CTGTCCAAACT	1
CTGTCAGACAC	1
CTGTCCAAAGT	1
CTGTCCTGTCG	1
CTGTCCAAATA	1
CTGTCCTTATT	1
CTGTCAAAATA	1
CTGTCGAAGAA	1
CTGTCAATACT	1
CTGTCGAATCC	1
CTGTAGTTACC	1
CTGTATTGCAA	1
CTGTCCAACTA	1
CTGTCGAGCAA	1
CTGTCCAACTC	1
CTGTCGATCAA	1
CTGTCCAACTG	1
CTGTCACCCGC	1
CTGTCAATCAC	1
CTGTCGCAGAA	1
CTGTCCAAGAC	1
CTGTCGGAGTT	1
CTGTCACAACG	1
CTGTCGGCCGG	1
CTGTATGAGAA	1
CTGTCGTAGAG	1
CTGTCCAAGGG	1
CTGTCAGAACA	1
CTGTCCAAGGT	1
CTGTCGTTATA	1
CTGTCCAATAC	1
CTGTCATCGAA	1
CTGTCCAATAT	1
CTGTCATCTAT	1
CTGTCCAATGA	1
CTGTCATCTCG	1
CTGTCAGTCTC	1
CTGTCATGCAC	1
CTGTCAGTGCA	1
CTGTCCTCTCT	1
CTGTCAGTGTT	1
CTGTCAAACTT	1
CTGTCCACGAT	1
CTGTCCTTATG	1
CTGTCCACGGG	1
CTGTCAAAGAC	1
CTGTCAGTTCC	1
CTGTCGAAAGT	1
CTGTCATAAAA	1
CTGTCGAAGAT	1
CTGTCACACCT	1
CTGTCAAATAT	1
CTGTATGCGAG	1
CTGTCGAATCG	1
CTGTCCATACA	1
CTGTCGAATTA	1
CTGTCCATACC	1
CTGTCGACCGG	1
CTGTCCATACG	1
CTGTCGAGAGG	1
CTGTCCATGTT	1
CTGTCATATGG	1
CTGTCCCAAAT	1
CTGTCGATACG	1
CTGTCCCAATG	1
CTGTACTTTCC	1
CTGTCCCACTT	1
CTGTCGCAACT	1
CTGTCACAGAC	1
CTGTCACCGAA	1
CTGTCCGAATC	1
CTGTCGCACTG	1
CTGTCATAATC	1
CTGTCATCAAG	1
CTGTCCGACCT	1
CTGTCGCCCCG	1
CTGTCCGACTT	1
CTGTCGGATCC	1
CTGTCCGAGAT	1
CTGTCATCAGC	1
CTGTCCGATCC	1
CTGTCGGGCTA	1
CTGTCACAGCT	1
CTGTCACTCGC	1
CTGTCATACGC	1
CTGTCGTAGGA	1
CTGTCCTACGC	1
CTGTCACTTCT	1
CTGTCACAGGA	1
CTGTCAAATGT	1
CTGTCCTAGAG	1
CTGTCGTTACC	1
CTGTCATACTG	1
CTGTCGTTGAG	1
CTGTCCTAGTT	1
CTGTCTAAACG	1
CTGTCCTATCA	1
CTGTCTAAGAC	1
CTGTCATAGAA	1
CTGTCTAATGG	1
CTGTCATAGAT	1
CTGTCTACAAT	1
CTGTCATAGCT	1
CTGTCTACCAA	1
CTGTCACATAG	1
CTGTCAGAATA	1
CTGTCCTCAAC	1
CTGTCTACTCT	1
CTGTCCTCATA	1
CTGTCCTCCAA	1
CTGGCCTATTC	1
CTGGCGAATTT	1
CTGGCATTGCC	1
CTGGCATATAG	1
CTGTACATACC	1
CTGGCCATGGC	1
CTGGTCTATCT	1
CTGGCGCTCCC	1
CTGGCCAAGTT	1
CTGGCATATAT	1
CTGTACAAGAT	1
CTGGCTTAGAG	1
CTGTACCTAGT	1
CTGGCGGACCT	1
CTGTACTGGGG	1
CTGGCTTAGGC	1
CTGGTTCGACC	1
CTGTACTTACG	1
CTGTAAAATCC	1
CTGGCAGAGGG	1
CTGTAATTAAA	1
CTGGCATTTCA	1
CTGGCTGTCAG	1
CTGGCGGATCC	1
CTGTACAGAAG	1
CTGGCCATTAC	1
CTGGCCTAGGG	1
CTGGCTTTCGT	1
CTGTACGAAGC	1
CTGGCTTTGAC	1
CTGTACTATCG	1
CTGGCGGCGGG	1
CTGGTCTACTT	1
CTGGCTTTTCA	1
CTGGTCTTACG	1
CTGGGAAACTA	1
CTGGCTATACG	1
CTGGGAATTAT	1
CTGGCATTGTA	1
CTGGGAATTGT	1
CTGGCTATTCT	1
CTGGCAGCAGG	1
CTGTAATCAAA	1
CTGGCATTTCT	1
CTGGCAGATCG	1
CTGGCATCTTG	1
CTGGCCTAAGG	1
CTGGGAGTAAG	1
CTGTACAACAA	1
CTGGGCAACGT	1
CTGGCATTGTT	1
CTGGCATATAA	1
CTGTACATAAC	1
CTGGCGTAGAC	1
CTGGCCTAGAC	1
CTGGGCGCGCA	1
CTGTACCGTCC	1
CTGGGCGTACC	1
CTGTACCTCGC	1
CTGGGCTAACG	1
CTGGCCATGGA	1
CTGGCGTATGC	1
CTGGCCTATTG	1
CTGGCATTCCC	1
CTGGCAGCTGG	1
CTGGGCTTGCG	1
CTGTACTTAAG	1
CTGGGGATGCG	1
CTGGTCTAGCG	1
CTGGGGGTGCA	1
CTGGTCTGACG	1
CTGGGTAGAGA	1
CTGGTGCGGAG	1
CTGGGTCCGTG	1
CTGGCATTGAT	1
CTGGGTGATTC	1
CTGGCTATCGG	1
CTGGCCTTCCC	1
CTGGCATAACC	1
CTGGCAGTGGG	1
CTGTAAAAATT	1
CTGGCCAAATT	1
CTGTAAATGGC	1
CTGGTAAAAGT	1
CTGGCTATTTC	1
CTGGTAAAGAC	1
CTGGCCGGGGA	1
CTGGCATAAGC	1
CTGTAATCCGC	1
CTGGCGTTGCT	1
CTGGCTCAGAC	1
CTGGTACAATT	1
CTGGCTGCCGG	1
CTGGCATAGTG	1
CTGGCCTAACT	1
CTGGCATCTCT	1
CTGTACAAAGG	1
CTGGTAGATCC	1
CTGGCCTACCT	1
CTGGCCAACCT	1
CTGGCCACGGG	1
CTGGTATACTC	1
CTGTACAATAA	1
CTGGTATATCC	1
CTGGCCAGGGA	1
CTGGTATATTG	1
CTGGCGACCGA	1
CTGGCTACGTC	1
CTGGCTTACCA	1
CTGGCTACTAT	1
CTGTACATATA	1
CTGGCATTCTT	1
CTGTACCCCAA	1
CTGGTCAAACA	1
CTGGCCATGAT	1
CTGGCTACTTA	1
CTGGCATCGGG	1
CTGGCATATAC	1
CTGTACCTATC	1
CTGGCATATCT	1
CTGGCCTATCA	1
CTGGTCAAATT	1
CTGTACGAGGG	1
CTGGTCACACT	1
CTGTACGTTTT	1
CTGGTCCCTGG	1
CTGTACTAACC	1
CTGGTCGAACT	1
CTGTACTAATC	1
CTGGTCGACCT	1
CTGTACTCGGG	1
CTGGCATATGC	1
CTGTACTGATT	1
CTGGTCTAACT	1
CTGTACTTAAA	1
CTGGTCTAAGA	1
CTGGCTTACGG	1
CTGGCCAATGG	1
CTGGCCTCTCT	1
CTGGTAGAGGG	1
CTGGCTTAGGT	1
CTGGCTTAGTC	1
CTGCCATATAA	1
CTGGCAAACGC	1
CTGCCCCCACC	1
CTGCCCTCTTC	1
CTGCCATCTCC	1
CTGCCAGACGC	1
CTGGAAATGGT	1
CTGCCTTAGGT	1
CTGCCACATGC	1
CTGCCCTGGAG	1
CTGCCCTACGA	1
CTGCCCAATGT	1
CTGCCTTACCA	1
CTGCCTTATGG	1
CTGCTTTAAGG	1
CTGCCTTATTA	1
CTGGACAAACT	1
CTGCCTTCAAC	1
CTGCCTCAGGC	1
CTGCCTTCAGG	1
CTGCCCAAACC	1
CTGCCTTCCAA	1
CTGCCAGTACA	1
CTGCCTTCCGA	1
CTGGCAACACA	1
CTGCCCTTGTC	1
CTGCCATCGTC	1
CTGCCTTGGGC	1
CTGGCACCTAT	1
CTGCCTTGTTA	1
CTGCCTATGGA	1
CTGCCTTTAGG	1
CTGCCCCAGGT	1
CTGCCCTTTCG	1
CTGCCTCAAGG	1
CTGCCATCTAC	1
CTGGACAATTG	1
CTGCCATAAGG	1
CTGCCATCATA	1
CTGCCAGCGAG	1
CTGCCTCATCA	1
CTGCCGAAGAA	1
CTGGATTTAGA	1
CTGCCATATGA	1
CTGCCAGATCC	1
CTGCCTTTTCT	1
CTGCCTGCCTG	1
CTGCCGAATAT	1
CTGGCAAATCC	1
CTGCCGAATTA	1
CTGCCAGATCT	1
CTGCGAGTAAG	1
CTGCCTTAAAG	1
CTGCGATAATT	1
CTGCCATGTAT	1
CTGCCAGATAT	1
CTGGCACAGAT	1
CTGCCCACTTT	1
CTGCCCTAGTT	1
CTGCCAGAAGC	1
CTGCCATAGTT	1
CTGCGCAAGCA	1
CTGCCTTAGAC	1
CTGCGCAAGCG	1
CTGCCCATGGG	1
CTGCCCAGGCG	1
CTGGAAAAAGC	1
CTGCGCACTCG	1
CTGCCTCAAGA	1
CTGCGCAGCAA	1
CTGGAAATTTT	1
CTGCCGAGTTT	1
CTGGAATTGCT	1
CTGCGCATTCA	1
CTGCCTCACGA	1
CTGCGCCGAAG	1
CTGGACGACCT	1
CTGCGCCTGGG	1
CTGGACGTAAA	1
CTGCCGGACAC	1
CTGCCAGAATA	1
CTGCGGAGGTG	1
CTGCCATCTGC	1
CTGCCGGATCG	1
CTGCCCGATTT	1
CTGCGGGTATC	1
CTGGATTACTT	1
CTGCCCAGTAT	1
CTGCCTCCATC	1
CTGCGTACGTC	1
CTGCCCGTTAT	1
CTGCGTCAAAG	1
CTGCCTGAAGG	1
CTGCGTCACTT	1
CTGCCTGCCGG	1
CTGCGTCATAA	1
CTGCCTGCTCG	1
CTGCCATTGTC	1
CTGGCAAATAG	1
CTGCCGTAAAT	1
CTGGCAAATCT	1
CTGCCGTACGA	1
CTGCCACGCCC	1
CTGCCTAAAGG	1
CTGGCAAATTC	1
CTGCCTAACTA	1
CTGGCAACACC	1
CTGCCTAACTG	1
CTGGCAACATC	1
CTGCTAGAGGG	1
CTGCCATAGTG	1
CTGCTAGATCG	1
CTGGCACAATC	1
CTGCCTAAGGA	1
CTGCCATACTA	1
CTGCCCATCGC	1
CTGGCACAGGC	1
CTGCCTAAGTA	1
CTGGCACATCT	1
CTGCTATTGTC	1
CTGGCACCGGT	1
CTGCCTAATTT	1
CTGCCCTCGAG	1
CTGCCTAGAGC	1
CTGGCAGAAGT	1
CTGCCATCAAA	1
CTGGCAGACAC	1
CTGCTCTGGGT	1
CTGCCTATACG	1
CTGCCTTACGG	1
CTGATCTTACA	1
CTGCAGCCTAT	1
CTGCAAGATGA	1
CTGACCTAGAG	1
CTGACGAACGT	1
CTGAGCATATG	1
CTGACTTGGGT	1
CTGAGCATGCG	1
CTGAGAAAACA	1
CTGAGCCGGAA	1
CTGAGAGTACC	1
CTGACGAATCA	1
CTGCCAAGTAG	1
CTGAGCGCGCA	1
CTGATCTTATA	1
CTGAGCGTACA	1
CTGACTTTCAG	1
CTGACCTCCCC	1
CTGACTATATC	1
CTGACGGCGTC	1
CTGCACTTACC	1
CTGACGGCGTT	1
CTGAGAGAGTT	1
CTGAGCTAACC	1
CTGCATTTCTA	1
CTGACGGCTTG	1
CTGCCAACCAA	1
CTGACCTAGGT	1
CTGCCAATTAT	1
CTGAGCTTACC	1
CTGACTTCCCG	1
CTGACGGTCCG	1
CTGACTAAGCT	1
CTGAGCTTACT	1
CTGACTAATGT	1
CTGACTTACAC	1
CTGCAAGACAC	1
CTGAGGAAACA	1
CTGCAAGGAGC	1
CTGAGGGATCG	1
CTGCACCTAGC	1
CTGAGGGCGCC	1
CTGCACTGGGG	1
CTGACTTACAG	1
CTGCAGAATTT	1
CTGACTTACAT	1
CTGCATCTAAA	1
CTGAGTGTACC	1
CTGCATTACTA	1
CTGAGTGTCGG	1
CTGAGAGTCCG	1
CTGAGTTAGTT	1
CTGACTCCAAC	1
CTGAGTTATGG	1
CTGAGCAACGC	1
CTGACTTACGA	1
CTGAGCACACG	1
CTGACGGTGTT	1
CTGCCAATCAG	1
CTGACTTACTG	1
CTGACGATTGG	1
CTGATAAAGGA	1
CTGACTTCCAT	1
CTGACGAGGCT	1
CTGATCTTACT	1
CTGACGTAACC	1
CTGACTTCTAA	1
CTGACGTAAGC	1
CTGACTAATCG	1
CTGACTTAGGA	1
CTGATGGTGCA	1
CTGATATACGG	1
CTGACTACTAT	1
CTGACGTACGG	1
CTGACGCTGTT	1
CTGATATTACC	1
CTGCAAGATCG	1
CTGATATTATT	1
CTGACTATATA	1
CTGATCAAAAA	1
CTGACTTTTCG	1
CTGATCAAACT	1
CTGCACAAAAG	1
CTGATCAAATG	1
CTGCACGGGGA	1
CTGACCTTCCA	1
CTGACGGAAAA	1
CTGACGATGGC	1
CTGCACTTACA	1
CTGATCACACT	1
CTGACCTTGTC	1
CTGATCACCAT	1
CTGACCTATCG	1
CTGACTTATCA	1
CTGAGACTAAA	1
CTGATCAGAGG	1
CTGAGACTACG	1
CTGACTTATCC	1
CTGCATTACGA	1
CTGACCTTCTC	1
CTGACTCATCG	1
CTGACGTCAGG	1
CTGCATTGCAA	1
CTGACTTATGT	1
CTGACTCATGA	1
CTGATCCTATC	1
CTGAGATTTTT	1
CTGATCCTCCG	1
CTGACCTATTC	1
CTGATCGAATC	1
CTGCCAAATAT	1
CTGACTTATTG	1
CTGACTGCACT	1
CTGATCTAACC	1
CTGCCAACTAC	1
CTGATCTAACG	1
CTGACGGAGTA	1
CTGATCTAATC	1
CTGACTGGCCT	1
CTGATCTAATT	1
CTGCCAATGCC	1
CTGACGTTGCA	1
CTGACCTTACG	1
CTGATCTGATC	1
CTGAGCAAAAC	1
CTGAGCAAACT	1
CTATCATATCT	1
CTGACATTCTC	1
CTGAAAACTCC	1
CTGACAAATGT	1
CTGAACAAAAT	1
CTGACAAATTG	1
CTAATCTTATT	1
CTGAACTAATT	1
CTGAAAGAAAG	1
CTATCATCCGC	1
CTGACCAAATT	1
CTGACAACGGA	1
CTGACCCTAGG	1
CTATCATTTTT	1
CTGAACCAATT	1
CTGAACTGATA	1
CTCTTCTAACC	1
CTGAACTTAAC	1
CTGACAAAAGT	1
CTGACAAGGGA	1
CTGACATGCGG	1
CTACCTTAGGC	1
CTGACCAAAAC	1
CTAACGGAGTT	1
CTGACCAAGCG	1
CTATCCTAAGC	1
CTGACCATATT	1
CTGACAATGAA	1
CTGACCGAATT	1
CTGACAATGGA	1
CTATCATCAAA	1
CTAAACAAATT	1
CTGACATAATA	1
CTGACAATTGA	1
CTAACAGAAAG	1
CTGACAATTTC	1
CTAACATAAAC	1
CTATCCTATCG	1
CTATACTTACC	1
CTGACACAATT	1
CTATCAGATCC	1
CTATCTACTAT	1
CTAACAACTTA	1
CTGACACAGTG	1
CTGAAAGTCCG	1
CTGAAGAATGT	1
CTGACATTTCT	1
CGGTCTTCCAA	1
CTGAAATAATA	1
CTGACACCGGT	1
CTAACATCTTC	1
CTATGCATACA	1
CTACCGTAAAG	1
CTGACACGAAG	1
CTGACCATATA	1
CTGACACGATA	1
CTGACCATGTC	1
CTGACACGCCC	1
CTGACCGAAAG	1
CTGACACGGAA	1
CTGACCGAGCT	1
CTGACACGTAA	1
CTGAACAAGAT	1
CTGACACTAAA	1
CTCTCACATCG	1
CTGACACTCCG	1
CTGACATAAAT	1
CTAACAAAGGA	1
CTCTCAGCCGG	1
CTATTCTTAAA	1
CTCTCTACTAT	1
CTGACAGAAAT	1
CTGACATACTC	1
CTATTCTTACG	1
CTGACATAGAC	1
CTGACAGAAGG	1
CTGAACATACG	1
CTCACAAAAAA	1
CTGACATATAC	1
CTCACAAAGGA	1
CTGACATATGG	1
CTGAACATATC	1
CTGAACGAATT	1
CTGAAGGAGTT	1
CTGACAAAGAC	1
CTGACAGACCC	1
CTGACATCTAT	1
CTGAACAATTT	1
CTGACATGAAC	1
CTCACAGAATA	1
CTGACATGGTG	1
CTGAATAAATT	1
CTGACATTCCG	1
CTCACCTTATC	1
CTGACATTGCT	1
CTGAATAATGA	1
CTACCCTAGAG	1
CTGAATCTATC	1
CTGACCAAAAG	1
CTCCCTTACGA	1
CTGACCAAATC	1
CTGACAGATTG	1
CTATCATAAGC	1
CTGACAGCGGG	1
CTGAAATAGTT	1
CTGACAGGACG	1
CTGAAATCGCA	1
CTGACAGGAGG	1
CTGACCAAGTT	1
CTCCCTTAGGC	1
CTGACCATAGC	1
CTGACAGGGGC	1
CTGAACAAACT	1
CTGACAGTACG	1
CTGACCATGGT	1
CTGACAGTATA	1
CTGACCATTCG	1
CTCGCATATTG	1
CTGAACAAATC	1
CTGACAGTCCC	1
CTGACCGAATA	1
CTCGCATCTAT	1
CTGACAAAGTA	1
CTGACAGTCCT	1
CTGACCGCCTG	1
CTAGCAAAAGT	1
CTGAACATAGG	1
CTAGCAAATGT	1
CTACCTTACTA	1
CTAGCGTACGA	1
CTAGCTACTTC	1
CCGTTCAAAAT	1
ATGTCTGTCTC	1
CCGCCCTAGGT	1
CAGCCATCTAC	1
CACGCAGATCC	1
ATGGCTTACGT	1
CAGACTTAGGT	1
CAGCCCTAGAG	1
ATGTCTATACG	1
CAGCCGAATTT	1
CCGGTCTAACG	1
CAGCCTTAAGG	1
CCGTCCTTATA	1
CAGCCTTACGA	1
ATGGCCTATCT	1
ACGTCTGTACT	1
CCGCCAGATGC	1
ATGACATCATA	1
CCGCCTCCAAC	1
CAGCGCAAACA	1
CCGGCAAATGT	1
CAGGCAAAAGC	1
CCGGCCTATCT	1
CAGGCAAAAGT	1
CCGTCAAGCAC	1
CAGGCAAATGC	1
CAGACAAAGGA	1
CAGGCACAATT	1
CCGTCTTATGC	1
CGGTCCAACTT	1
CGGACAGTCCG	1
CGGTCCTTATA	1
CGGGCAAATGC	1
AAGGTCAAACT	1
CCGCCAAGTAT	1
CAGGCATCTAT	1
ACGATCTTATC	1
CAGGCATTGCT	1
CCGCCGTAAAG	1
CAGGCCGACAT	1
CCGCCTTACGA	1
ATGCCCTAGGT	1
ATGTCTGCCGG	1
ATGACAAAACC	1
CCGGCACAGAC	1
ATGTACCTATC	1
ATGTCTTATGC	1
ATGTACTGATC	1
ACATCAATCTC	1
CAGTACTTACC	1
ATGTTCAAAAT	1
CAGTCACATCA	1
ATGATCTTATC	1
CAGTCACATCG	1
CCGTCATCAAA	1
CAGTCACATCT	1
CCGTCCAAGAT	1
CAGTCAGAAGA	1
ATGGCCATGGT	1
CAGTCAGATCC	1
CAGACCAAGCT	1
CAGTCAGCCGG	1
ATGGCCGTCCT	1
ATGTCAAACAC	1
ATGACATACGG	1
ATGCCTTAAGG	1
CGGCCATCTTC	1
CAGTCATCCGC	1
CGGTCAAGCAC	1
ATGACAACTTA	1
CGGTCATTTTT	1
ATGTCACATCT	1
ACGATATTATC	1
CAGTCCAAGAT	1
CCGCCATCCCG	1
CAGTCGAAAGG	1
CCGCCCTAGAG	1
CAGTCGCACCC	1
CCGCCGAATTT	1
ATGTCAGAAGA	1
ATGTCGAAAGG	1
CAGTCGCATCG	1
CCGCCTTAAGG	1
CAGTCGCCCCG	1
ATGAGCTTACG	1
CAGTCGTATTA	1
CCGGCAAAAGC	1
CAGTCTACTAT	1
CCGGCAAAGAC	1
CAGTCTGCCGG	1
CCGGCACAATT	1
CAGTCTGTCTC	1
CCGGCATATCC	1
ATGCCTTACTG	1
CCGGCATTGCT	1
CAGTGCTAACC	1
CCGGCCTACTT	1
CAGTGCTTATC	1
ATGGCATACGC	1
CAGTTCTTAAA	1
CCGGTCAAACT	1
ATGACGGAGTT	1
ATGTGCTTATC	1
ATGTCATATCT	1
CCGTCAAATCC	1
ATGCCTTTGTC	1
ATGTTCGAATC	1
CCGACAAAACC	1
ATGGCATATTT	1
CCGACAAAGGA	1
ATGATCTTATT	1
ATGTCATCATA	1
CAGACAAAACA	1
ATGACACGAAA	1
ATGGCCAATAC	1
CCGACAGTCCG	1
CAGACACGAAA	1
CCGACATACAC	1
CCGTCGAATCA	1
CCGACATCATA	1
ATGCATTTTTC	1
CCGACCAAAAA	1
CAGACCAAAAA	1
ATGGCAAAAGC	1
CAGACCATATC	1
CCGACCATATC	1
CCGTTCGAATC	1
CCGACCTTATC	1
CAGACGGAGAT	1
CCGACGTATGC	1
CGGACATACAC	1
ATGTCCAACTT	1
CGGACCATATC	1
CCGACTTACAA	1
CGGACGAAAGT	1
ATGTCCAAGAT	1
CGGCCTTACTA	1
CCGACTTATCG	1
ATGGCGTACGA	1
CCGAGCATACG	1
CGGTCACAGAA	1
CCGAGCGTACC	1
CAGAGCTTACG	1
ATGACTTACAA	1
ATGGCTACTTC	1
CCGATCTTACC	1
CGGTCGAATCA	1
CAGGCAGCGGG	1
CAGGCATATCC	1

## Sheet: HfeCas9 PAM_counts
7mer	counts number
CTGGGAATTTT	35540
CTGTGGAATTC	21858
CTGGGAAGATA	17832
CTGAGAAATTT	17324
CTGGGAAAGTC	15216
CTGTAGAAAAC	14624
CTGCGAAAGTT	13894
CTGAGAAAACT	11582
CTGGGATATGC	11469
CTGCGAAGAAT	10985
CTGCGAGAAAT	10780
CTGGGAAACTA	10477
CTGGGAAAACA	9162
CTGTGAAATCA	8800
CTGTGAAAGGA	8502
CTGGGAATTCC	8411
CTGGGACACGA	8096
CTGGGAATACT	7739
CTGAGAAATTC	7675
CTGCGAATGCA	7242
CTGAGAAAAAA	6995
CTGTGAAATCT	6734
CTGTGAATCAG	6498
CTGCGGAATAT	6196
CTGTGAAACGG	5719
CTGAGAGAAAG	5525
CTGGAACAGTG	5374
CTGTGACAGAT	5185
CTGGGAATACG	5105
CTTGGACATTC	5080
CTGCAAAAGAG	4894
CTGCAAAAAAT	4506
CTGTGAAGTCT	4504
CTGGAAAAATC	4430
CTGGGAAATTA	4359
CTGCGAGATGT	3966
CTGGGAAGACG	3667
CTGCGAACCCC	3662
CTGGGAGACTA	3630
CTGTGACTAAC	3577
CTGAGAAGCAA	3493
CTGAGAAAAAG	3488
CTGAAAAAAAA	3462
CTGTAAAATCC	3371
CTGATGAAAAA	3294
CTGTGAGTAGT	3255
CTGGGTACCCG	3237
CTGATGATTCT	2709
CTGAGAAGGAA	2673
CTGGGGTACAG	2566
CTGTGAAAGTT	2477
CTGTAAAACAA	2376
CTGCGGAAATC	2218
CTGAGAATTTT	2164
CTGCGAGAATT	2046
CTGAGAATCGC	1866
CTGGGAAGGAC	1826
CTGAGAAGAGT	1599
CTGCAAAAGAA	1457
CTGCGTATAGT	1429
CTGTGTCATGC	1368
CTGCATTTTGG	1308
CTGTGCGAAGC	1203
CTGGAAAGACG	1187
CTGCAAAATCA	1144
CTGAGAAACAT	1109
CTGGAAATACA	1084
CTGGGAATCGC	1057
CTGATGATAAA	1054
CTGGGCATAAA	988
CTGAGATAATT	963
CTGGGGGAACC	935
CTGCGGCACTG	910
CTGCAAAACGT	892
CTGCGAATATC	873
CTGTGAAAAAA	863
CTGGGCAACGT	826
CTGGGACATGC	826
CTGAGAAGTCC	801
CTGAGAAGCTC	794
CTGGGAGACTT	789
CTGTGAAGTTC	695
CTGGGAATGTG	684
CTGGGGAATCC	679
CTGCTGAAAAA	653
CTGCGGAATTG	620
CTGGGAGAGTT	616
CTGATGAAAAC	602
CTGAGGAAAAT	593
CTGTGATAAGC	551
CTGGAGAAAGG	540
CTGTGAAGAAT	534
CTGGGTGTACA	507
CTGGTGAAAGA	500
CTGCGGAACAC	495
CTGTGAGTAAC	478
CTGAGAAAACA	466
CTGTGAAACCA	368
CTGCGTTACGA	361
CTGGGAGCAAG	344
CTGTGAGAGTT	336
CTGCGAAGGGG	257
CTGGGAGTAAA	170
CTGCAAATCCA	141
CTGCGAACGAT	70
CTGGGTTTATT	29
CCGGGAAAACA	22
CTGTATAAAAC	21
CCGTGGAATTC	20
CTGGGAATATA	20
CCGGGAATTTT	19
CTAGGAATTTT	19
CTGGGAAAGTT	17
CTGTGAATTTT	17
CTGCTCCCAGT	16
CTATGGAATTC	15
CTGGGAATTAT	15
ATGGGAATTTT	13
CTGAGAAAAAT	13
CTATAGAAAAC	12
CTGCATGTCAT	12
CTGTGTTTTTT	12
CTGTGTAATTC	12
CCGGGAAAGTC	11
CTGCCCTCGGG	11
CTGCGAATAAT	11
CTGGGAATTTC	11
CTGTTGAATTC	11
ACGTGGAATTC	10
CTGAAAAAAAG	10
CTGAGAAATCT	10
CTGCAAAGGAG	10
CTGGGAAATTC	10
CTGTGCCCTAG	10
CTGTGGAAAAC	10
CTAAAAAAAAA	9
CTGACCTTATC	9
ATGAGAAATTT	9
CCGCGAGAAAT	9
CTGGGAAATTT	9
CTGGGAATTCT	9
CTGGGAATTTA	9
CTGGGAATATT	9
CTGGGAATACC	9
CTGTGGAATCC	9
CCGCGAAGAAT	8
CCGTGAAATCA	8
CTGCCAGGAAT	8
CTGAGAGAAAT	8
CTGACTTAAAA	8
CTGGGAAAACT	8
CTGGGATATGT	8
CTGGTAATTTT	8
CTGGGATATGA	8
CAGGGAAGATA	7
CTAAGAAATTT	7
CCGTAGAAAAC	7
CTGCGAAAATT	7
CTGCAAAGGTT	7
CTGAGAAATAT	7
CTGCGGAATTC	7
CTGGGAAAAAA	7
CTGCGGACTAT	7
CTGGGAAAACG	7
CTGGGAAAATA	7
CTGCTTCCACA	7
CTGGGGTATGC	7
CTGGTTTTCGT	7
CTGGGGATTTT	7
CTGTGGGATTC	7
CTGTGAAATCG	7
CTGTGAAATTC	7
CTGTGGAATTA	7
CTTGGAATTTT	7
ATGGGACACGA	6
CTACGAAGAAT	6
ATGTAGAAAAC	6
CCGTGAAATCT	6
CCGAGAAATTT	6
ATGAGAGAAAG	6
CTGAAAAAGAG	6
ATGTGGAATTC	6
CTGCGAAAGAT	6
CTGATAAAACT	6
CTGCGAAATTT	6
CTGGGAAATCC	6
CTGGGAAGATC	6
CTGCTAAGAAT	6
CTGTCCTGTTC	6
CTGGGTTTAAA	6
CTGGGACATTA	6
CTGGGAATTCA	6
CTGTCAGCGGG	6
CTGGGCTACGA	6
CTGGGAATGCT	6
CTGTGAAATGA	6
CTGTGGAGTTC	6
CTGTGAAAGTC	6
CTGTGAAGATA	6
CTGTGAAAGAG	6
ATGAGAAATTC	5
ATGCGAAAGTT	5
ATGGAAAAATC	5
CTAGAAAAATC	5
CTACGAAAGTT	5
CTATGAAAGGA	5
ATGGGAAATTA	5
CCGAGAAAAAA	5
ATGCGAGAAAT	5
CAGGGAATTTT	5
CCGGGAAATTA	5
CTATGAAATCT	5
CGGGGAATTTT	5
ATGGGATATGC	5
CTGAGGAAACT	5
CTGAGAAAACC	5
CTGAGAGAAAA	5
CTGAGAAATTA	5
CTGAGTGCGGT	5
CTGCAGCTGCA	5
CTGAGAAAAGG	5
CTGAGAAACAA	5
CTGCAAGAAAT	5
CTGACTACCTA	5
CTGGACAATTG	5
CTGCGAATGCG	5
CTGCGAGGAAT	5
CTGGGAAACGA	5
CTGGCCCACTG	5
CTGGAAAAGTC	5
CTGTAAAATCA	5
CTGGGGAGATA	5
CTGGGGCACGA	5
CTGGTAAACTA	5
CTGTGGACTTC	5
CTGTGAATACT	5
TTGGGAAAGTC	5
CTGTGATATCA	5
CTGTGAATACG	5
CTGTGAAAGTA	5
CTGTGGAATTT	5
CTGTGAAACTA	5
CTGTGGAATAT	5
CTGTGAATTCT	5
CTGTGAATTCC	5
CTGAAATCTGA	4
ATGCGAAGAAT	4
ATGTGAATCAG	4
ATGAGAAAACT	4
ATGTGAAGTCT	4
ACGAGAAGCCG	4
CTACAAAAGAG	4
ATGGGAAGATA	4
ATGCGAATGCA	4
CTAATGAAAAA	4
ATGCGAACCCC	4
ATGGGAAAGTC	4
ATGTGAAATCA	4
ATGGGAAACTA	4
CCGCAAAAGAG	4
ATGGGAAAACA	4
CTATGAGTAGT	4
CGGAGAAAACT	4
CCGGGAATTCC	4
CTGAGGGAAAG	4
CTGAGAGAGAG	4
CTGATGTGTGG	4
CTGCGAAAGGA	4
CTGATGATTCC	4
CTGAGAAATAC	4
CTGCGAAATCA	4
CTGAGAAAGTC	4
CTGCGAAAGTC	4
CTGAGAAACTC	4
CTGATAAAAAA	4
CTGAGAAACGC	4
CTGAGTCGTTG	4
CTGAGGAATTC	4
CTGAGAAGTAA	4
CTGAGGAATTT	4
CTGAGGCCGAC	4
CTGGAGCTGCA	4
CTGCGGGAAAT	4
CTGGGAAATAC	4
CTGGAATATGC	4
CTGGGAAACCA	4
CTGGAAAGATA	4
CTGCTAGAAAT	4
CTGGAAAGACT	4
CTGCGTGTAAA	4
CTGCGAATGAA	4
CTGCGGAAACC	4
CTGGAAAAATT	4
CTGCGACGAAT	4
CTGGGAAGATG	4
CTGGCCGTCCT	4
CTGCTCTAGCA	4
CTGCGAAGACT	4
CTGTATCCATC	4
CTGGGAATGTT	4
CTGGGAATGTC	4
CTGGTAAGATA	4
CTGGGACTACT	4
CTGGGACACTA	4
CTGGGACATGA	4
CTGGTAAAGTC	4
CTGGGAATTGT	4
CTGGGAGGATA	4
CTGGTGTGATC	4
CTGTAACAGTG	4
CTGGGTGTAAA	4
CTGTCTTTATT	4
CTGGTATATGC	4
CTGGGAATCTT	4
CTGGGATATAC	4
CTGGGAATATG	4
CTGGGAGTTTT	4
CTGGTAATTCC	4
CTGGGAGTTGC	4
CTGGGAGTAAG	4
CTTGGGCATTC	4
CTGTGTTTCCG	4
CTTGGACATTT	4
TTGGGAATTTT	4
CTGTGACAGGT	4
CTGTGCTAGTT	4
CTGTGGAACTC	4
CTGTGATAGAT	4
CTGTGAGAAAT	4
CTGTGACTCAC	4
CCGGGAAACTA	3
CAGCGAAGAAT	3
CAGTAGAAAAC	3
CTAGGAAGATA	3
CTGACAAAAAA	3
CTAGGAAATTA	3
CCGCGAACCCC	3
CTAGGAAACTA	3
CAGGGAATTCC	3
CTACAAAAAAT	3
CTATGCGAAGC	3
CTAAGAAAACT	3
CTAGGATATGC	3
CGGTAGAAAAC	3
CCGCGAATGCA	3
CGGAGATTGTG	3
CCGAAAAAAAA	3
CGGAGAAATTT	3
CTCGGAATTTT	3
CCGTGAATCAG	3
CAGGGAAACTA	3
CCGTGAAAGGA	3
CAGCGAAAGTT	3
CTGAAAAAACT	3
CTATGACTAAC	3
CCGTAAAATCC	3
ATGAGAAGCAA	3
CCGGGATATGC	3
CCGGGAATACG	3
CCGAGAAAAAG	3
CTGAGAATGCA	3
CTGAGATTGTG	3
CTGCGAACCCA	3
CTGCAAAATAG	3
CTGAGACAGAT	3
CTGCAAAAGTT	3
CTGAGAAGACT	3
CTGCGAAACCC	3
CTGAGAAAGTT	3
CTGCGAACACC	3
CTGCGAAAGAG	3
CTGCAAAACCC	3
CTGAGAATTTC	3
CTGATTAAAAA	3
CTGAGAAGATA	3
CTGCCTCTGGT	3
CTGAGAAGAAA	3
CTGAGTGTAAA	3
CTGCAGTGCCT	3
CTGAGGTCACC	3
CTGACTTTCAG	3
CTGAGGAAATC	3
CTGAGATACTT	3
CTGGGAAATCA	3
CTGGGAACGTC	3
CTGCGTAATAT	3
CTGGGAAACTC	3
CTGCGAGACGT	3
CTGGAGATACA	3
CTGCGTTAATA	3
CTGGGAAACGG	3
CTGGGAACTTT	3
CTGGAATAGTG	3
CTGCGCTAGTC	3
CTGGAATAAAC	3
CTGGGAAAGCA	3
CTGGGAAAGTA	3
CTGCGAAGAAC	3
CTGGGAAACAA	3
CTGCGAAGGAT	3
CTGGGAAAATC	3
CTGCGGGGGGC	3
CTGGGAAGGTC	3
CTGCGGAACAT	3
CTGGAAAAAAA	3
CTGCGCTATAC	3
CTGGGAATAAT	3
CTGGCCTCGGA	3
CTGCTGGTTTA	3
CTGCGAGAAAC	3
CTGCTGGGTTC	3
CTGCGAATCAG	3
CTGCTGCCAGA	3
CTGCGTCTCCA	3
CTGTCTCGACT	3
CTGGGAATGCA	3
CTGGGATAAGC	3
CTGGGGGACTA	3
CTGTAGCGAGT	3
CTGGGAGAAAG	3
CTGGTAATACG	3
CTGGGCATAAT	3
CTGTAGCTGCA	3
CTGGGACGATA	3
CTGTAGAAAAA	3
CTGTAGAGAAC	3
CTGGGGAATCA	3
CTGTAAAAGGA	3
CTGGGTACCCA	3
CTGGGCAGATA	3
CTGTCCCTCCT	3
CTGTAGAAAAT	3
CTGGTATTACG	3
CTGTAAAACGG	3
CTGTATATAAT	3
CTGGGACACAA	3
CTGGTAATACT	3
CTGTCCGTCCT	3
CTGGTAGGTAG	3
CTGTAAAAATC	3
CTGTAATCTGA	3
CTGTAAAAAAT	3
CTGGGGAAGTC	3
CTGTATGTCAT	3
CTGGGGATACT	3
CTGGGTACCAG	3
CTGTGAAATAA	3
CTGTGAGACTA	3
TTGCGAAAGTT	3
TTGAGAAAACT	3
CTGTGAAAAGA	3
CTGTGATTCAC	3
CTGTGACGGAT	3
CTGTGAATCAT	3
CTGTGAAACGC	3
CTGTGATATGC	3
CTGTGGAATAC	3
CTGTGTAAGGA	3
CTTGTACATTC	3
CTGTGATAGGC	3
CTTGGAATTCC	3
CTGTGAAGTCC	3
CTGTGACATCT	3
TTGTGAAATCA	3
CTGTTTCTCAC	3
CTTGGACATAC	3
CTGTGACACGG	3
CTGTGAACCCC	3
CTGTGAGTAGC	3
ATGTGAAAACA	2
CTAGGACATTC	2
ATGCAAAAAAT	2
CTAAGAAATTC	2
CAGAGAAGCAA	2
CGGTGACAGAT	2
CTATGAATCAG	2
CGGTGAAATCA	2
CTAGGAGACTA	2
CGGGGAAGATA	2
CAGGGAAATTA	2
CGGAGAAGCAA	2
ATGTGACTAAC	2
CTAGGAATACT	2
ATGGGTACCCG	2
CCGTGACAGAT	2
CTATGAAGTCT	2
CTGAAGTCGAA	2
CTATAAAACAA	2
CCGTGAAACGG	2
ACGGAAAAATC	2
CCGGGGTACAG	2
CAGGGATATGC	2
CCGGGAGACTA	2
CAGGGAAAGTC	2
CCGGGACACGA	2
CAGAGAAATTT	2
CTGAAAAAAAT	2
ATGTGAATAAA	2
ACGCGAATATC	2
ATGTAAAATCC	2
CTACGAGAATT	2
ATGGGAATTCC	2
CCGGGAAGATA	2
ATGGAACAGTG	2
CCGCGGAATAT	2
CTATGAAACGG	2
CCGCGAAAGTT	2
ATGAGAAGGAA	2
CCGAGAGAAAG	2
ATGAAAAAAAA	2
CCGAGAAATTC	2
CCGAGAAACAT	2
CAGGGAATACG	2
CTGAGAAGTCT	2
CTGAGAAATCA	2
CTGAGAAGAAT	2
CTGCAAAGGAA	2
CTGATAAATTC	2
CTGATAAAAAG	2
CTGCATTTGCT	2
CTGCCTCTATA	2
CTGAGAACAAC	2
CTGAGTTTAGG	2
CTGAGAAAATC	2
CTGCAAATAAT	2
CTGCGAAAGTA	2
CTGCCTCGGCT	2
CTGAGAAGGAG	2
CTGCGAAACTA	2
CTGATGAAATA	2
CTGCCCTTTCG	2
CTGATGAAAAG	2
CTGATTTTGTC	2
CTGAGAAATTG	2
CTGAGGAAAAG	2
CTGAGAAACTT	2
CTGAGCTAGGA	2
CTGACTTTCGG	2
CTGAGCGTGAT	2
CTGAGAATCTC	2
CTGATTTGAGG	2
CTGAGAAGTTT	2
CTGAGATTCTC	2
CTGCATTTGGG	2
CTGCAAATGCA	2
CTGAGAAGGAC	2
CTGACTAGTTT	2
CTGAGAAGCAG	2
CTGAGAGTCTG	2
CTGATGAAAAT	2
CTGCAAAAGGG	2
CTGAGAAGAAG	2
CTGAGAGTAGT	2
CTGAGAACCCC	2
CTGAGAGATTC	2
CTGCCTCTTGT	2
CTGAGAGACAG	2
CTGATAGAAAG	2
CTGCCAGATGC	2
CTGATACGGTA	2
CTGCCACGTTC	2
CTGCAGAAAAT	2
CTGATGATTCG	2
CTGACTTTTTT	2
CTGATGATTCA	2
CTGATAAATTT	2
CTGAGAATTCT	2
CTGATGATTAT	2
CTGAGAGTTGC	2
CTGAGAGTCAC	2
CTGGAATTTAA	2
CTGCGACAGTT	2
CTGGCAGTAGT	2
CTGGCAGGGTT	2
CTGGGAAGGAT	2
CTGCGAAGATA	2
CTGCGAGGATT	2
CTGGCTTGACG	2
CTGGGAACCAC	2
CTGCGTTTTGG	2
CTGGGAAACTG	2
CTGCGTTTATA	2
CTGCGCTTTAC	2
CTGCGTTTAGT	2
CTGCGCAAGAA	2
CTGCGTTTAAT	2
CTGCGAGCAAT	2
CTGCGTTATTG	2
CTGCGAGAAGT	2
CTGGACATAAA	2
CTGCGACTCGA	2
CTGGCTACCTA	2
CTGGCCGACCT	2
CTGCGAAGTAT	2
CTGCGAAGTTC	2
CTGCGAAGGTT	2
CTGGCCTTAAA	2
CTGGAAAGACA	2
CTGCGCTTGTC	2
CTGGAAAATTC	2
CTGGGAAATAA	2
CTGCGTAAATC	2
CTGCGAGTAGT	2
CTGGATTTTCA	2
CTGGATACCCG	2
CTGCGGGAATC	2
CTGCGAGATAT	2
CTGGCGGTAAC	2
CTGCGAGACAT	2
CTGGGAAGAAG	2
CTGCGAGAACT	2
CTGCGGATGCA	2
CTGGAACACGA	2
CTGGGAAGAAC	2
CTGGAAATTTT	2
CTGGGAAGAAA	2
CTGCGAATTCA	2
CTGGACAACGT	2
CTGGGAACACT	2
CTGGGAACTTA	2
CTGGGAAAAAG	2
CTGCGGAATAC	2
CTGCGAAGTCT	2
CTGGGAAGGCG	2
CTGGAAAAACA	2
CTGGGAAATTG	2
CTGGGAAGACA	2
CTGGCCCAATG	2
CTGCGTACATA	2
CTGGGAAGTCG	2
CTGCGTTTTTG	2
CTGCTAAAGTT	2
CTGCTAATGCA	2
CTGGGAGGTTT	2
CTGGTTGGCTA	2
CTGGGACAGTC	2
CTGGTACAGTG	2
CTGTAGAATTC	2
CTGGTACACGA	2
CTGGGAGACTG	2
CTGTCCCGGCG	2
CTGGGAATTTG	2
CTGTCCCCCTA	2
CTGGGATCATG	2
CTGGTAAATTA	2
CTGGGATACGA	2
CTGGTAAAACA	2
CTGGGAGAGTC	2
CTGGGTTTGTT	2
CTGGGAGAACA	2
CTGGGTTTGCG	2
CTGGGACACGG	2
CTGGGTATACA	2
CTGTAAAAACT	2
CTGGGTACCTG	2
CTGGGATGATA	2
CTGTATTGAAA	2
CTGTCTCTGGC	2
CTGGGGCGTCG	2
CTGGGATACGC	2
CTGGGGCCGAC	2
CTGGGAGTACT	2
CTGGGGATTCC	2
CTGGGAGGGAC	2
CTGTCTGTACT	2
CTGTAAGTAGT	2
CTGTAGTGCCT	2
CTGGGAGACCA	2
CTGGGGAATAT	2
CTGGGACTCCG	2
CTGGGGAAACA	2
CTGTCGTAATC	2
CTGGGCTGACA	2
CTGTAAAATAC	2
CTGGGAATCTC	2
CTGTAAAAGAG	2
CTGGGAATCCC	2
CTGTAAAAAAC	2
CTGGTCGGTAA	2
CTGGGATTTTT	2
CTGGTGATTCT	2
CTGTGTCATTC	2
CTTTGGAATTC	2
CTGTGAAATAT	2
CTGTGAGATCT	2
CTGTGAAAAAC	2
CTTTAGAAAAC	2
CTTGGACACGA	2
CTGTGGGTCGT	2
CTGTGGTATTC	2
CTGTGGGTCCA	2
CTTGGAAGACG	2
CTGTGACTGAC	2
CTGTGTCTATT	2
CTGTTCTGCCC	2
CTGTGAAATGG	2
CTGTGGCCGAC	2
CTGTGAAATCC	2
CTGTGACTAAA	2
CTGTTTCGTGT	2
CTGTTCCCAGT	2
CTTGGAATACT	2
CTGTGACATGC	2
CTTTGAAGTCT	2
CTGTGGAGTCT	2
CTGTGAAAAAG	2
CTGTTAAAGGA	2
CTGTGAAGACG	2
TTGTAGAAAAC	2
TTGAGAAATTC	2
CTGTGGAATTG	2
CTGTGAAATTA	2
CTTGGATATGC	2
CTTGGAAACTA	2
CTGTGTTTTCT	2
CTGTGCCTTAC	2
CTTAGACATTC	2
GTGTGAAATCT	2
CTGTGGAATGC	2
CTGTGTACCCG	2
CTGTGTTTAGT	2
CTTCGAAAGTT	2
CTGTGGAATCA	2
CTGTGAAAGGG	2
CTGTGTTTAGG	2
CTGTGGTACAG	2
TTGTGAAGTCT	2
CTTGGAAGATA	2
CTTGGACATTA	2
CTGTGAAACCT	2
CTGTGTGTAAA	2
CTGTGAAACAA	2
CTGTGAAGCGG	2
CTGTGAAAACA	2
CTGTGAAGCCT	2
CTGTGGAAGGA	2
CTTGGAAAGTC	2
CTTTGAAAGGA	2
CTGTGGAAATC	2
ATGCAAAAGAG	1
ATGTGAAACGG	1
ATTTAGAAAAC	1
CTAGGACACGA	1
ATGGGAATACG	1
CCGGGGGAACC	1
CTAGGAGACTT	1
CTACGAGATGT	1
CCTGGACATTC	1
CCGGGAGACTT	1
ATGGGCATAAA	1
CGGGGAGAGTT	1
ATGGAAAGACG	1
CCGGGACATGC	1
ATGAGAATCGC	1
CTGAAAGGAGC	1
ACGTGAATCCA	1
CGGGGAATTCC	1
ATTCGAATGCA	1
CGGGGAATACG	1
CTGACCCAATG	1
CTGACCCAAAG	1
CCGTGAGTAGT	1
CTGACCTTGTC	1
CTCAGAAAAAG	1
CCGGGAATACT	1
CTGACAGAAAG	1
CTGACCTTCTG	1
CTATGAAATCA	1
CGGGGAAATTA	1
ATGAGATCGAT	1
CTGAAAAAAAC	1
ATGAGAAGATT	1
CTGACCAGCCG	1
CTACGGAATAT	1
CTACGAGAAAT	1
CAGAAAAAAAA	1
CTCTGCGAAGC	1
ATTGGACATTC	1
CCGGAGAAAGG	1
ATGTGTCATGC	1
CCGGAACAGTG	1
CTCGGAAAACA	1
CCGGAAAGACG	1
ATGTGAAATCT	1
CCGGAAAAATC	1
CTCCGAAACTA	1
CCGCGTTACGA	1
CCGTGAGAGTT	1
CGGGGAAACTA	1
ATGGGAGACTA	1
CTCTGACTCAG	1
CGGTGAATCAG	1
CTGAAGAAAGG	1
CTGACAGCGAT	1
CTCTGAAAGTT	1
CTAGAACAGTG	1
CTGAAGAAAAT	1
ATGCGAGATGT	1
CGGGGAAAACA	1
CTGAAAAAATA	1
CTCTGAAAGGA	1
ATGATGAAAAA	1
CGGGAACAGTG	1
CTATAAAATCC	1
CCGAGAATTTT	1
ATGAGAAGCTC	1
CCGAGAAGCAA	1
CTACGTATAGT	1
CCGAGAAGAGT	1
ATGAGAAAAAA	1
CTCGGGAATCC	1
ATATAAAATCC	1
CGGCGAGAAAT	1
ACGTAAAACAA	1
CGGCGAAAGTT	1
ATTTGAAACTA	1
CCGAGAAAACT	1
ATTTAACAGTG	1
CGGCAAAAAAT	1
ATTGGAATTTT	1
CTGAATAAAAC	1
ATGTTACAGAT	1
CTACATTTTGG	1
CTCGGAAAGTC	1
CAGTGGAATTC	1
ATGTGACAGAA	1
CAGTGACTAAC	1
ATGTGAATACG	1
CAGTCCTTCTT	1
CTCCGAGAATT	1
CTGAAGAAAAC	1
CTCCGAGAAAT	1
CAGTAAAATCC	1
CCGTGATAAGC	1
CAGGGTACCCG	1
ATGTAGAAAAA	1
CGGAGAAGGAA	1
ATGGTGTACAG	1
CAGGGAGACTA	1
ATGGGGTACAG	1
CTACAAAAGAA	1
CTCAGAAATTT	1
CTACAAAACGT	1
ATGGGACATGC	1
CAGGGAATGTG	1
CTCAAAAAAAA	1
CAGGGAATCGC	1
ATGGGAATACT	1
CTGAACAAAAA	1
ATGGGAATAAT	1
CTCGGAATTCC	1
CTAAGATATGC	1
CGGTGGAATTC	1
CTAAGATAATT	1
CTAGGAAGGAC	1
CCGTGAAGTTC	1
CTAGGAATACG	1
CTGAAAAAGAA	1
CAGGGAAAACA	1
CTGACACGTCG	1
CAGGAACAGTG	1
CTGACAAAGTC	1
CAGGAAAAATC	1
CTAAGAGAAAG	1
CAGCTAATGCA	1
CGGTGAAATCT	1
CAGCGAGATGT	1
ATGAGGAAAAT	1
CAGCGAATGCA	1
ATGAGATAAAG	1
CTAATGATAAA	1
ATGAGAATTTT	1
CAGCGAACCCC	1
CTAAGAAAAAA	1
CTGAACAATTG	1
CTAAGAAGGAA	1
CAGCAAAATCA	1
ATGAGAAGAGT	1
CAGATGATTCT	1
CTAAGAAGAGT	1
CAGAGAATTTT	1
ATGAGAAAAAG	1
CTGAAAAGTCG	1
ATGACAAAAAA	1
CGGAAAAAAAA	1
ATCAAAAAAAA	1
CAGAGAAATTC	1
CCGTAAAACAA	1
CAGAGAAAACA	1
ACGTGAAGTCT	1
CAGAGAAAAAG	1
CCGGGTACCCG	1
CAGACTTAAAA	1
CTCGGACATTC	1
AAGAAAAAAAA	1
CCGGGAATGTG	1
CCGGGAATCGC	1
CTGCAAGATGT	1
CTGAGAACACT	1
CTGCAAAAAAG	1
CTGAGGACCAC	1
CTGAGAAAGAG	1
CTGCCGAAAAA	1
CTGACGATTCT	1
CTGATGGAAAA	1
CTGCAAAATAA	1
CTGAGGAACAT	1
CTGAGAAATGT	1
CTGCCTTGTTG	1
CTGAGAAAATT	1
CTGCCCTTATA	1
CTGAGGCACTG	1
CTGCGAAAGTG	1
CTGAGAAGTCG	1
CTGCAAACCCC	1
CTGAGAAGCGA	1
CTGAGGAAAAA	1
CTGATTCGTGT	1
CTGAGCTTTTC	1
CTGCAAAGAAT	1
CTGAGCTTACG	1
CTGCGAAAGCA	1
CTGAGCTGACA	1
CTGAGAAACTA	1
CTGCCTTAGAA	1
CTGAGAAAAGA	1
CTGCAAAAGAT	1
CTGCAACAGTG	1
CTGAGCGCCCG	1
CTGACTCTAAT	1
CTGAGCCTTCC	1
CTGAGAAGTTC	1
CTGAGCCGCGT	1
CTGATAAGCAA	1
CTGAGCCACAG	1
CTGATAAATTA	1
CTGAGCATAAA	1
CTGAGAAGCAC	1
CTGAGCAGAGT	1
CTGATAAAAAC	1
CTGCAAAATGT	1
CTGAGTTTTAC	1
CTGATGATCAA	1
CTGATTCGAGA	1
CTGAGATTAGT	1
CTGCATGAGAA	1
CTGAGATCATT	1
CTGCCTATTCG	1
CTGAGATATGC	1
CTGAGTATAGT	1
CTGCCTGTATC	1
CTGATGGTAAA	1
CTGCCCTAGTC	1
CTGCAGAAAAC	1
CTGAGAGTTTT	1
CTGAGAAAATA	1
CTGATGACTCT	1
CTGAGAAAACG	1
CTGATGAATAA	1
CTGCGAACCAC	1
CTGAGAGTCGC	1
CTGACTTTCTA	1
CTGATGAAGAA	1
CTGAGGAGGAA	1
CTGATGAACAA	1
CTGCAAATGAG	1
CTGAGAGTAAG	1
CTGAGGAGAAT	1
CTGAGAGGCAA	1
CTGATAATTTT	1
CTGAGAGGAAG	1
CTGCATTTGGT	1
CTGAGAGATTT	1
CTGAGAAGGGA	1
CTGCAAAATCC	1
CTGCAAAAAAA	1
CTGCCATCGAC	1
CTGCATTTGCC	1
CTGATGAAACA	1
CTGCGAAACTT	1
CTGAGAGAATT	1
CTGCATTTCGG	1
CTGAGAGAATG	1
CTGCATTGACC	1
CTGCGAACAAC	1
CTGAGAAGACC	1
CTGCGAAAAAT	1
CTGAGTTTTGT	1
CTGAGAGAAAC	1
CTGAGTTTCTA	1
CTGCAAAACGC	1
CTGAGAACAAG	1
CTGAGACTTTT	1
CTGAGAACAAA	1
CTGAGACTGGA	1
CTGCCTTTGTA	1
CTGAGACTCGC	1
CTGCATCAACG	1
CTGAGACTAAC	1
CTGAGTGAAAG	1
CTGAGACGCGC	1
CTGCAGTACCA	1
CTGAGACGAGT	1
CTGAGAAATAA	1
CTGAGACCAGT	1
CTGCAGAAGAG	1
CTGAGACATTC	1
CTGAGAAAGAA	1
CTGCCTGACAG	1
CTGCAGAAATC	1
CTGAGACAGAA	1
CTGAGGGAAAT	1
CTGAGACACTG	1
CTGCACCCGTG	1
CTGAGACACGA	1
CTGCCGCTGTG	1
CTGAGACAACT	1
CTGCACAAGAG	1
CTGAGACAAAA	1
CTGCAATCAGT	1
CTGCCAACCCC	1
CTGCAAGGAGC	1
CTGAGAATTTG	1
CTGCAAGAGAG	1
CTGCGAAACGG	1
CTGAGAAAAAC	1
CTGATCAACTA	1
CTGAGGCGCGA	1
CTGAGAATGTT	1
CTGCGAACCCT	1
CTGATATTAAT	1
CTGACTTACAA	1
CTGATATCAGG	1
CTGACTGCACT	1
CTGCAAAAACA	1
CTGAGGAGCTC	1
CTGAGAATCAC	1
CTGACGCTGAT	1
CTGAGAATACT	1
CTGACGAATGG	1
CTGAGAATAAG	1
CTGCCTTTTTC	1
CTGCTGAATAT	1
CTGGGAACCCC	1
CTGCGATAAAT	1
CTGCTATTATC	1
CTGCGAATGGG	1
CTGCTAGATTT	1
CTGCGCAGGGG	1
CTGCTAGATGT	1
CTGGGAAGTCC	1
CTGCTAGAATT	1
CTGGAAAAATA	1
CTGGATAGTTG	1
CTGCGAATACT	1
CTGCTACGACT	1
CTGGGAAGTAC	1
CTGGGAAATGA	1
CTGCGATTCCG	1
CTGGCTTTGGC	1
CTGCGAGGTGT	1
CTGGCTTTACT	1
CTGCGAGAGAT	1
CTGGAGCAGTG	1
CTGGAAAACTA	1
CTGGCTTGGTT	1
CTGCGACAAAT	1
CTGGAGAATGG	1
CTGCTTAAAAA	1
CTGGAGAAATG	1
CTGCTGCATTT	1
CTGGAGAAATC	1
CTGGGAAGTTA	1
CTGCGTTCAAT	1
CTGCGCGCTCG	1
CTGGGAATAAG	1
CTGGAAATATA	1
CTGCGTTATGA	1
CTGCGATATGT	1
CTGCGTTATCG	1
CTGGAAATACG	1
CTGCGTTATCC	1
CTGGGAAAATT	1
CTGCGTTATAT	1
CTGGGAACCCG	1
CTGGGAATAAA	1
CTGGGAAAGGA	1
CTGGAGAAAAG	1
CTGGCCCTTGC	1
CTGGACCCGAT	1
CTGCGAGAAAA	1
CTGCGTGCTTG	1
CTGGGAAGGGC	1
CTGCGTGAAAT	1
CTGGAAAAAAT	1
CTGGACCAGTG	1
CTGGCCATTGG	1
CTGCGTCTACA	1
CTGGGAAAGCC	1
CTGCGTATGGT	1
CTGGCAGGAAT	1
CTGGGAAAGAC	1
CTGCGAAGGGT	1
CTGGCTCTCGG	1
CTGCGAAGAGT	1
CTGGGAAACAT	1
CTGCGAAGAAA	1
CTGCGTAAGTT	1
CTGCGCTACAA	1
CTGCGTAACAC	1
CTGCGCGAAGC	1
CTGGCGTTTTA	1
CTGCGCAAGTT	1
CTGCGGTACTG	1
CTGCGATTTTC	1
CTGGAATGTCT	1
CTGCGATTACT	1
CTGCGGGATGT	1
CTGCGATAATT	1
CTGCGGGAATT	1
CTGCGAGTGCA	1
CTGGAATCTGA	1
CTGCGAGTAAT	1
CTGGCGTTAAT	1
CTGGGAAGCTA	1
CTGGGAAACAC	1
CTGCGAGCGAT	1
CTGCGGCACTA	1
CTGCGAGATTT	1
CTGCGGCAAGT	1
CTGGGAAGCAC	1
CTGGAATAATC	1
CTGCGAGACTA	1
CTGCGGAGTAT	1
CTGGAAACAAG	1
CTGGCGGGTGT	1
CTGCGAGAATA	1
CTGCGGACCAC	1
CTGGCCCGGTT	1
CTGCGGAATTT	1
CTGGCCCGACA	1
CTGGAAGTCAC	1
CTGGGAAGGTA	1
CTGGAACGGTG	1
CTGCGACATTT	1
CTGCGGAATCT	1
CTGCGACACGC	1
CTGGAACCGTG	1
CTGCGAATTTT	1
CTGCGGAATAG	1
CTGCGAATGTA	1
CTGGAACAGTT	1
CTGCGAATGCT	1
CTGCGGAATAA	1
CTGGGAAGGTT	1
CTGCGGAAGTT	1
CTGCGAATCCC	1
CTGGGAAGGAA	1
CTGGGAACACA	1
CTGGAACAGTC	1
CTGGGAAGTTT	1
CTGGGAACCTA	1
CTGGCAGAGGT	1
CTGGAACAGCG	1
CTGCTGCATAT	1
CTGCGGAAAAC	1
CTGCTGAGAAA	1
CTGGAACAGAG	1
CTGCTGAAGAA	1
CTGGGAAACTT	1
CTGCTGAAATC	1
CTGCGCTTAAC	1
CTGGCAAAATC	1
CTGCGCTCTTG	1
CTGCGAACGTT	1
CTGGCCTCTCC	1
CTGGGAATAAC	1
CTGGAAATGTG	1
CTGGGTAAATT	1
CTGGGACTTTT	1
CTGGGTCTATC	1
CTGGGGTGCAG	1
CTGTCGAAAAC	1
CTGTCAAAGGA	1
CTGTAGAAAGC	1
CTGGGGTATCG	1
CTGGGTATTTT	1
CTGGGGTATAG	1
CTGTAAAGCAA	1
CTGGGGTACGG	1
CTGTAAAACAG	1
CTGTCTTTACT	1
CTGGGATACAG	1
CTGGGGGTCGT	1
CTGTCACCTCC	1
CTGGGGGGACC	1
CTGTACCCCCG	1
CTGGGGGATCC	1
CTGGGTATCCG	1
CTGGGGGAGCC	1
CTGGGACGCGA	1
CTGGGGGACTT	1
CTGTCAAGGCG	1
CTGTCTTCACT	1
CTGGGTAATCC	1
CTGGGGGAATC	1
CTGGGAATTAC	1
CTGTATCCTCA	1
CTGGGTAAACA	1
CTGGTAAGACG	1
CTGTAGAATAT	1
CTGGTAGACTA	1
CTGGGAGTCTG	1
CTGTCTGTTTG	1
CTGTCTATTAT	1
CTGTCTGTCCG	1
CTGGGAGGACG	1
CTGTCCATGGG	1
CTGTCTATAAC	1
CTGTATAGGTA	1
CTGTAACTAAC	1
CTGGGGATACG	1
CTGGGAGAAAT	1
CTGGGGAGTCC	1
CTGGGTAGTTG	1
CTGTATAATAA	1
CTGGGACGACG	1
CTGGGGAGACG	1
CTGTAAAATCT	1
CTGGGGACTCC	1
CTGTCAAATCT	1
CTGGGGACCAC	1
CTGGGACAACA	1
CTGGTAAACTG	1
CTGTCCTTATC	1
CTGTCCAGCTG	1
CTGTCTTTCTT	1
CTGTCCGGCCC	1
CTGGGTAACCG	1
CTGTAGTACCA	1
CTGTCCTCGGG	1
CTGGGGAACTA	1
CTGTCTTGGGG	1
CTGGGGAACCC	1
CTGGGATAATT	1
CTGGGGAAACC	1
CTGTAGAAGAC	1
CTGGGTTTTTC	1
CTGGGAGTGTC	1
CTGGGCTTTCC	1
CTGGGAGTAGT	1
CTGGGCTTACG	1
CTGTCTTTCCG	1
CTGTCTTGTTT	1
CTGGGTGCGGT	1
CTGTAGTAAAC	1
CTGTCTATATT	1
CTGGGCGCTCG	1
CTGGGAGCCAG	1
CTGGGCGAAGC	1
CTGGGAGATTA	1
CTGGGTTTGGT	1
CTGGGTCGTTG	1
CTGGTAATCGC	1
CTGGGTATGTG	1
CTGGGAATCAC	1
CTGGGAGACCT	1
CTGTCCACATT	1
CTGTCCCTCAC	1
CTGGTATTCAT	1
CTGTCGTTTGC	1
CTGTCCTAAAT	1
CTGGGACTTCC	1
CTGGTAGTTAG	1
CTGTAACAGAT	1
CTGGGCAACTA	1
CTGTAAAGTCT	1
CTGTAGATCCA	1
CTGGGACCCGA	1
CTGTCCAACGA	1
CTGTAAAATTC	1
CTGGGATTGTG	1
CTGGTACATGC	1
CTGGGATGTGC	1
CTGGGACACGT	1
CTGGGTTCATC	1
CTGGGACACGC	1
CTGGGATCTGC	1
CTGTCTTTGTT	1
CTGGGTTATGC	1
CTGTCCTTGCA	1
CTGGGATATTT	1
CTGGGTAAGTC	1
CTGGGATATTC	1
CTGTAAAACGA	1
CTGTAGAGCAT	1
CTGTCCTTATA	1
CTGGGATATGG	1
CTGGGTAACTA	1
CTGGGTTAGGT	1
CTGTCCTGGAT	1
CTGTAGACACG	1
CTGTCCTCTTG	1
CTGGGATATCA	1
CTGGGAATGCG	1
CTGGGTGTTTG	1
CTGGTGTACAG	1
CTGGGATAGTC	1
CTGGGTGTGGG	1
CTGGGCCTCTT	1
CTGGGAATCAG	1
CTGGGCCAGTG	1
CTGTCCTCGCA	1
CTGGGCATGAA	1
CTGGTCCCAGT	1
CTGGGCATAGA	1
CTGTCCTATTC	1
CTGTAGGAAAC	1
CTGGGAATACA	1
CTGTCTGCCGG	1
CTGTCTGAACC	1
CTGTGGCGAGT	1
CTGTGTGTACA	1
CTGTGACAGGA	1
CTTGAAAAATC	1
CTTGGAGACTA	1
CTGTGGAAGTT	1
CTGTGAAACGA	1
CTGTGGAAGTC	1
CTGTGAATTAG	1
CTTCGTATAGT	1
CTGTGAAGGGA	1
CTTCGGAATTG	1
CTGTGTAACCA	1
CTGTGGAACGG	1
CTGTGAAAGAT	1
TTGTGGAATTC	1
CTGTGAAAACC	1
CTTCGAAGAAT	1
CTGTGACACGA	1
CTGTGCTGTTC	1
CTGTGAATCCG	1
TTGTAAAATCC	1
CTGTGTCGTTG	1
CTGTGCTAGGA	1
CTGTGAAGCAA	1
CTGTGCTAAGC	1
CTGTGAACCAC	1
CTGTGCGCTCG	1
TTGCGAACGAT	1
CTTCAAAAGAG	1
CTGTGAAAGGT	1
CTGTGCCTTCC	1
TTGCAAAAGAA	1
CTTATTAAAAA	1
TTGTGACAGAT	1
CTTAGGAAAAT	1
CTTGAGAAAGG	1
CTGTGCAATTC	1
CTTTGACATTC	1
CTGTGATTGTG	1
CTTTGAAAGTT	1
CTGTGATTGTA	1
CTGTGAATGCA	1
CTGTGATTCCA	1
TTGGGAATTCC	1
CTGTGATTCAG	1
CTGTGAATAAG	1
CTTAGCTGTTA	1
CTGTGAAGTCA	1
CTGTGATTATT	1
TTGGGAAATTA	1
CTGTGATTAGT	1
CTGTGAAGACT	1
CTGTGATTAAC	1
CTGTGTAATCT	1
CTGTGATGAGC	1
CTGTGAAATTT	1
CTGTGATCGAA	1
TTGCGGAATAT	1
CTGTGATCAAG	1
TTGTGAAACGG	1
CTGTGATATTT	1
CTGTGGCAAGT	1
CTGTGATATTC	1
CTGTGGATCAG	1
CTTAGAGAAAG	1
CTGTGAAACTG	1
GTGTGAAAAAA	1
CTGTGGAGCAT	1
CTGTGATAGTT	1
TTGTGAAACCA	1
CTTAGAAATTT	1
CTGTGAAAAGG	1
CTTAGAAATTC	1
TTGAAAAAAAA	1
CTGTGATACGT	1
CTTTGAGTAGT	1
CTGTGATACAT	1
CTGTGACAGCT	1
CTGTGATAATC	1
TTGGGATATGC	1
GTGTAGAAAAC	1
CTGTGTTTTCC	1
CTGTGAGTTGT	1
CTGTGTTTATT	1
CTGTGAGTTGC	1
CTGTGAATGGA	1
CTGTGAGTGGT	1
CTGTGAATCGG	1
CTGTGAGTCTG	1
TTGTGAAGTCA	1
CTGTGAGTCAG	1
CTGTGAATCAC	1
CTGTGAGTATT	1
CTTTAAAATCC	1
GTGGGACACGA	1
TTGGGAAGATA	1
CTGTTGGGTAT	1
CTTGGTGTAAA	1
CTGTGAGTAGA	1
CTGTGAAGGGG	1
CTGTTGGCGTC	1
CTGTGAAGGAT	1
CTGTGAGATGT	1
CTGTGTCAGCT	1
GTGAGATAATT	1
CTGTGTCAATA	1
CTGTTGAAAGA	1
TTGTGAATCAG	1
CTGTGAGAGGA	1
CTGTGAACCGG	1
CTGTGAGACTT	1
CTGTGAACCAG	1
GCGACCAAGTA	1
CTGTGAACAAC	1
CTGTGAGACGG	1
TTGGGAAAACA	1
CTGTTCGAGCC	1
CTGTGGTTTGT	1
CTGTGAGAAAG	1
TTGCGAAGAAT	1
CTGTGACTTCG	1
CTTGGACACTC	1
TTGGGGGAACC	1
CTGTGGCTAAC	1
CTGTGACTCTA	1
CTTGGACAATC	1
CTGTGACTCGC	1
CTGTGGATTTC	1
CTGTGACTCAG	1
CTGTGGATCCA	1
CTGTTCCACTG	1
CTGTGAAAGCT	1
CTGTGACTAAT	1
TTGCAAAAGAG	1
CTGTTATATGC	1
CTGTGAAACTC	1
CTGTTAATCAG	1
CTGTGAAACGT	1
CTGTGACGTTC	1
TTGAGAAGCAA	1
CTGTTAAGATA	1
CTGTGGACTAG	1
CTGTGACCTCC	1
CTGTGAAACAG	1
CTGTGACCTAT	1
CTGTGAAAATA	1
CTGTGACCGAT	1
CTTGGAAATTC	1
CTGTGACCCAT	1
TTGAGAAAAAA	1
CTGTTAAATCT	1
CTTGGAAAACA	1
CTGTTAAATCA	1
CTTGAACAGTG	1
CTGTGACAGTT	1

## Sheet: Hpa2Cas9 PAM_counts
7mer	counts number
CTGAGATAATT	180396
CTGCGTTAATA	55408
CTGGGATATGC	46643
CTGGGTTTATT	46043
CTGGAATAAAC	42943
CTGCGTTATTG	32173
CTGCGCTATAC	30039
CTGGGCTACGA	29920
CTGTGTTTATT	21275
CTGTGATACGT	20850
CTGGGTTAGGT	20184
CTGGGTTTAAA	17990
CTGCGCTACAA	13106
CTGTGACATCC	11848
CTGCATCAACG	11064
CTGGCGTTAAA	10864
CTGGGATTTTC	10260
CTGGGACATTA	8593
CTGTGATACAT	7645
CTGATATAAAA	6573
CTGCGTTATCC	5778
CTGCGCTTAAC	3630
CTGGACTAAAG	3168
CGGAGATAATT	3108
CTGTAATATAT	2435
CTGCGTTATAT	1650
CTGGGATAGGC	818
CTGCGTTGATA	449
CTGGGTTCATC	343
CTGAGATAATC	132
CTGGGATAATT	99
CCGAGATAATT	64
ATGAGATAATT	59
CTGAGATAATA	56
CTGATATAATT	51
CTGAGATGATT	49
ACGAGATAATT	47
CTGAGGTAATT	45
CTGGGTTTATC	44
CTGCAGCCTAT	34
CTGAGATAGTT	33
CTAAGATAATT	31
CTGAGGGTGCA	28
CTGAGATAACT	28
CTGAGATAAAT	25
CTGAGATATGC	24
ATGGGATATGC	24
CTGGGGGTGCA	24
CTGGGTACTAG	24
CTGTGTTAATA	24
CTGTGATATGC	23
ATGGAATAAAC	22
CTGAGACAATT	22
CTGGGATATGA	22
CTGGGATATGT	22
CTGAGTTAATA	21
CCGGAATAAAC	21
CTGGAATAAAT	21
CTGGATCTTGA	20
CTGCGTTAATG	20
CTGGTTCGCAC	20
CTGGGCTATGA	20
CTGGGGTATGC	20
ATGCGTTAATA	19
CCGCGTTATTG	19
CTGTGCTATAC	19
CTGGGTTACGA	19
CTGGGTTAATA	18
CTGAGATACTT	17
CTGCAGGCTGA	17
ATGCGTTATTG	17
CTGAGATCATT	17
ATGGGCTACGA	17
CTGCGTTATTA	17
CTGCGTTAATT	17
CTGCATTAATA	17
CTGTGATATGT	17
CCGCGTTAATA	16
CTGCTTTAATA	16
CTTAGATAATT	16
CTGTGTTTTTT	16
CTGTAATAAAC	16
CCGGGTTTATT	15
CTGGGATACGC	15
CTGTGATAATT	15
GTGAGATAATT	15
TTGAGATAATT	15
CTGAAATAATT	14
CTAGAATAAAC	14
ATGCGCTATAC	14
CTGCGCTATAT	14
CTGGAATAAAA	14
CTGGTCTACGA	14
CTGTGTTATTG	14
CTGGGTTTATA	14
CTGGGCTACGG	14
CTGGGAATTTT	13
CTGCGTCAATA	13
CTGCGTTATCA	13
CTGGGATATAC	13
CTGGTATATGC	13
CAGAGATAATT	12
ACGCGAGAATT	12
CTGGGACATGC	12
CTGACCTTATC	11
CTGAGAAAAAA	11
CTGAGTTAATT	11
CTATGATACGT	11
CTGCGTTATCG	11
CTGCGTTAGTA	11
CTGGGATAAAC	11
CTGGAATAGAC	11
CTGTCTTTATT	11
CTGTGCTACGA	11
CTGTATTTATT	11
CTGAGATAATG	10
ATGGGTTTATT	10
CCGGGATATGC	10
CTGAGTTATTG	10
ATGGGATTTTC	10
CTGATATACAA	10
CTAGGATATGC	10
CTGCGCTAATA	10
CTGGGATATTC	10
CTGCATTAACG	10
CTGGAATGAAC	10
CTGGAATAAGC	10
CTGGATCCTAG	10
CTGGGTACCCG	10
ATGTGACATCC	9
ATGGGTTTAAA	9
CTGACTTAAAA	9
CTGGGCCACGA	9
CTGGGCTACAA	9
CTGGGAAACTA	9
CTGCGTTAAAA	9
CTGCGCTATAA	9
CTGCGTTATTT	9
CTGGTTTTATT	9
CTGTGATACTT	9
CTGGGTTTAAT	9
CTGTGTTAGGT	9
CTTGAATAAAC	9
CTGGGTTATGT	9
CTGAGTTTATT	8
ATGGGTTAGGT	8
CTGAGAGAATT	8
CTGCATCAACT	8
CCGTGTTTATT	8
CTGGAGTAAAC	8
CTGGACTAAAC	8
CTGGCCCACTG	8
CTGGGATGTGC	8
CTGCTTCTCGG	8
CTGCGATAATT	8
CTGGGCTACTA	8
CTTGGATATGC	8
CTGGGTTTACT	8
CTGGGTTAGGC	8
CTGGGTTAGTT	8
CTGTGAAATCT	8
CTGAGAAAACA	7
CTGAGAAATTT	7
CGGGGTTTATT	7
CTGAGAAAATT	7
CTAGGTTAGGT	7
CTGAGATTATT	7
CTGAGCTATAC	7
CAGGGTTTATT	7
ACGGGATATGC	7
CTGCAAAAAAT	7
CCGGGTTAGGT	7
ATGTGTTTATT	7
CCGTGATACGT	7
CTGCGCTATGC	7
CTGCGCTAGTC	7
CTGCGTTAACA	7
CTGCGTTATAC	7
CTGGAATATGC	7
CTGCGGTATTG	7
CTGGGCGCCAT	7
CTGCATTATTG	7
CTTGGTTTATT	7
CTGGGTTTAGA	7
CTGGGTCCTAG	7
CTGTGCTAGTT	7
CTGGGTTCATT	7
CTGTGATATAT	7
CTTGGTTAGGT	7
CTGTGATACGC	7
CTGGGCTTATT	7
CTGGTATAAAC	7
CAGGGATATGC	6
CTGAGTACTAG	6
CAGCGCTATAC	6
CTGAGATAAGT	6
ACGCGACACCC	6
CTGAGACATCC	6
CAGCGTTAATA	6
CTGAGCTACGA	6
CTGACCCTGAT	6
CTGAGATACGT	6
CCGGGCTACGA	6
CTGCGCTGTAC	6
CTGCGATACGT	6
CTGCGCCATAC	6
CTGGCGTTAAG	6
CTGGGATTCTC	6
CTGGATTTATT	6
CTGGGATACGA	6
CTGTGTTTATC	6
CTGGGTTTGAA	6
CTGGGTATATT	6
CTGTGGGTGCA	6
CTGGGTTTGTT	6
CTGGTGTTAAA	6
CCGTGATACAT	5
CTGAGATATTT	5
ATGTGATACGT	5
CTACATCAACG	5
ATGCGTTATCC	5
CGGTGTTTATT	5
CTGAGAGTGCA	5
CGGCGTTAATA	5
CTGAGCTACAA	5
CTGAGAAAAAG	5
CTGAAGGGCGT	5
CTAGGTTTATT	5
CTGAGAAATTC	5
CTGAGATACAT	5
CCGGGATTTTC	5
CTGCATCAGCG	5
CCGGGACATTA	5
CTGAGATAAAC	5
CCGCGCTTAAC	5
CTGCTCTATAC	5
CTGCGATATAC	5
CTGGACTACGA	5
CTGCGTCATCC	5
CTGGGATAGGT	5
CTGCATTTTGG	5
CTGCGCTACAG	5
CTGCGATAATA	5
CTGGCCCAATG	5
CTGGGACACCG	5
CTGGCTTTAAA	5
CTGGGAATTCC	5
CTGCGTCATTG	5
CTGGAGGCTGA	5
CTGCTTTATTG	5
CTGGAAAAAAC	5
CTGCGTTTATT	5
CTGTTATACGT	5
CTGGGTCTATT	5
CTGTGAAAGGA	5
CTGTCTGTACT	5
CTGTGGCATCC	5
CTGGGTTCAAA	5
CTGTGACATCT	5
CTGGTTTAGGT	5
CTGGGCTGCGA	5
CTTCGTTATTG	5
CTGACATAATT	4
CAGGAATAAAC	4
AGGAGATAATT	4
CTCAGATAATT	4
CTGCACTATAC	4
CTGAGATTTCT	4
CTGATATAAAG	4
CTGAGATTGTG	4
CAGGGTTTAAA	4
CTGAAATAAAC	4
ATGTGATACAT	4
CCGCGCTATAC	4
CTACGTTATCC	4
CCGCATCAACG	4
CTGAGTTTAAA	4
CGGTGACATCC	4
CTGCAATAAAC	4
CAGTGTTTATT	4
CTGAGAAACGC	4
CAGTGACATCC	4
CTGAGACACCG	4
CTGCGTTAGTG	4
CTGCGCAATAC	4
CTGCGCTACGA	4
CTGGCCTCGGA	4
CTGCCTTTTTC	4
CTGCGTACTAG	4
CTGCGCTACTA	4
CTGCGGGCTGA	4
CTGGGACGTTA	4
CTGCGCTTGTC	4
CTGGCCTTAAA	4
CTGGATTTAAA	4
CTGCATTGACC	4
CTGCGCTATTG	4
CTGGGAGTGTC	4
CTGGGTTAATT	4
CTTGGTTTAAA	4
CTGGGTTGGGT	4
CTGTGATTGTT	4
CTGTGTACCCG	4
CTGTGATTCGT	4
CTGGTATTTTC	4
CTGTGATGCGT	4
CTGGGTTATGC	4
CTGTGATACGA	4
CTGGGTTAGTA	4
CTGTGTTTCCG	4
CTGGGTTAGAT	4
CTGTGACATCA	4
CTGGGTCTTGA	4
TTGGGTTTAAA	4
CTGGGCTACGT	4
CTGCATCGACG	3
CCGGCGTTAAA	3
ATGCGCTACAA	3
CTAATATAAAA	3
ATGGCGTTAAA	3
CTGAGATAAAA	3
CGGGGCTACGA	3
CGGATATAAAA	3
CAGGACTAAAG	3
CGGAGATACTT	3
CTGAGTTTTAC	3
CAGTGATACGT	3
CTACGTTAATA	3
CTGACTGCACT	3
CTACGCTACAA	3
CTGACTCTAAT	3
CCGTGACATCC	3
CAGTGATACAT	3
CAGGGACATTA	3
CTGAGATTCTC	3
CCGGGTTTAAA	3
CTGATATGAAA	3
CGGGAATAAAC	3
CTGAGTTATGG	3
CTGCAAAACCC	3
CTGCATCTAAT	3
CTGCGTTTATA	3
CTGGGATTTTA	3
CTGCGATACAT	3
CTGCGCTTAGC	3
CTGCATTTGCT	3
CTGCGCTTAAT	3
CTGGGATGGGC	3
CTGGGATATTA	3
CTGGCGCTAAA	3
CTGGGCTAAAG	3
CTGCCTAGAGC	3
CTGGAATATAT	3
CTGCGTTAATC	3
CTGGAATTTTC	3
CTGGCATTAAA	3
CTGGGACATTG	3
CTGGGATTTCC	3
CTGGAGTTAAA	3
CTGCGATACAA	3
CTGGCGTTATA	3
CTGCGTTACAA	3
CTGCGTGATTG	3
CTGCCTCTATA	3
CTGGAATAATT	3
CTGCGTTATAG	3
CTGGGAAAGTC	3
CTGGCCGACCT	3
CTGCGCTACAC	3
CTGGAGCCTAT	3
CTGCGCTATCC	3
CTGCTCTACAA	3
TTGTGATACGT	3
CTGTGAAATCA	3
CTGTGCCTTAC	3
CTGTGAAAAAA	3
CTGTGCTTATT	3
GTGGGTTTATT	3
CTGTGTACTAG	3
CTGTGTTTATA	3
CTGTGACATAC	3
CTGGGCTAGGA	3
CTGGGTGTAAA	3
CTGGGGCATTA	3
CTGTGAAAAAC	3
CTGGGCTAGGT	3
CTGTGTTAATT	3
CTGTAGGCTGA	3
CTGTGATACAC	3
CTGTAATACGT	3
TTGCGTTAATA	3
TTGTGATACAT	3
CTGTGACACGT	3
CTGTAACATCC	3
CTGGGTTAAAA	3
CTGTGCTACAA	3
CTGTGATATCC	3
CTGTGATTCAC	3
CTTGCGTTAAA	3
CTGTGTTTAAA	3
CTGGGTTTGGT	3
CTGTATTGAAA	3
CTGTAAAAACT	3
CTGAAAAAGAG	2
CAGCGTTATTG	2
CTGACTTTCAG	2
CTCTGACATCC	2
CTGAATCCTAG	2
CTGATATAGAA	2
CTGCATCAAAG	2
CTATGACATCC	2
CTGAGCTTAAC	2
CTGAGATCTGG	2
CTGAGCTAATT	2
CTAGGTTTAAA	2
CTGAAGGCTGA	2
CTAGGCTACGA	2
CTGAGTTAGTA	2
CTGCATCAATG	2
CTGAGGGGCGT	2
CTACGTTATTG	2
CTGACTTACAA	2
CTACGCTATAC	2
CAGGCGTTAAA	2
CGTAGATAATT	2
CAGCGCTACAA	2
CGGGGATTTTC	2
ATGTAATATAT	2
CTGCACTACAA	2
ATGGGACATTA	2
CTGCACCAACG	2
ATGATATAAAA	2
CTGCATCAACA	2
ACAGGACATTC	2
CGGAGATAATA	2
CCGCGTTATAT	2
CTGGCCCGACA	2
CTGGACTAGAG	2
CTGGATTAAAG	2
CTGGGAAGATA	2
CTGGCCGGCTT	2
CTGGGAAATTA	2
CTGGGACATCC	2
CTGGGAAAACA	2
CTGCGCAACAA	2
CTGGCTTTGTG	2
CTGGCCTAAAG	2
CTGGAATAATC	2
CTGGGATATAT	2
CTGGGATTATT	2
CTGCGCTCTAC	2
CTGGAACAAAC	2
CTGCGCTACAT	2
CTGGAAAAATC	2
CTGCGCCACAA	2
CTGCTTTATCC	2
CTGCGATATGC	2
CTGGGAGGTTT	2
CTGCGTTAAAT	2
CTGGCGTTGAA	2
CTGGCCGTCCT	2
CTGGGATATCC	2
CTGGACTAACG	2
CTGCGTTTTTG	2
CTGCGGGTGCA	2
CTGCGTTTTCG	2
CTGCGCTTTAC	2
CTGGGAGACTA	2
CTGGCATATGC	2
CTGGGATCTTC	2
CTGGGACATCA	2
CTGCGTTATCT	2
CTGGATTAGGT	2
CTGGGATCTGG	2
CTGCGCGATAC	2
CTGGCGTGAAA	2
CTGCGCAATGG	2
CTGGCGTCAAA	2
CTGCGATTGTT	2
CTGGCGATAAA	2
CTGCGAGAAAT	2
CTGCGTTACTG	2
CTGGCCTGACG	2
CTGCCCTTTCG	2
CTTGGCTACGA	2
CTGTTACATCC	2
CTGTAATATAA	2
CTGTGATAAGT	2
CTGTGTTTGTT	2
CTGGTTTTAAA	2
CTGTATCAACG	2
CTGTGTTTAGT	2
CTGGGGTTAAA	2
CTGTGTTTACT	2
TTGGGCTACGA	2
GAGTGATAATT	2
CTGTCCATGGG	2
CTGTGATAAAT	2
TTGTGACATCC	2
CTGTGACATTA	2
CTGTTTTTATT	2
CTGGGTTTTAA	2
CTGTGAAGTCT	2
CTGTGTTCATT	2
CTGGGCTTCGA	2
CTGGGTTTGTA	2
CTGGGCTAGTA	2
TTGCATCAACG	2
CTGGGTTATCC	2
TTGGGATATGC	2
CTGTGATTTTC	2
CTGGGTTTCTT	2
CTGTATTGACG	2
GAGTGATAAGC	2
CTGTGATACCT	2
CTGGGTTTATG	2
CTGTATCTTGA	2
CTGTGTTATCC	2
CTGTGACACCC	2
CTTTGTTTATT	2
CTTATATAATT	2
CTTTGATACAT	2
CTTGGACATTC	2
CTGGGTTTAAG	2
CTGGGGTTATT	2
CTGTCTGAACC	2
CTGTAATACAT	2
CTGGGTTCGGT	2
CTGTGCTATTA	2
CTGTGTTACGT	2
CTGGGCTATGC	2
CTGTCTCTGGC	2
CTGTGATCCGT	2
CTGTCCTTATT	2
CTGTCCGTTCG	2
CTGTCCGTCCT	2
CTTCGTTATCC	2
CTGTCCCCCCC	2
CTTCGTTAATA	2
AAGAGAGAAGA	1
CTGATATTTCT	1
CTGATCCCGAC	1
CTAAGCTACGA	1
ATGAGAAAAAA	1
CTGCAGCAACG	1
CTGACGAATGT	1
CTCCCATATTG	1
CTGACATAAAA	1
CTGATACAAAA	1
CTGCAGTTTCA	1
CGGTGATACGT	1
CTCTGTTTATT	1
CTGAGTTTTTT	1
CAGGAATAAAA	1
CTGCATCACCG	1
CACGGATATGC	1
CGGGGTTTAAA	1
CTGACCCCGTG	1
CGGGGTTAGGT	1
CTGAATCAACT	1
CTGAGTTTCTA	1
CTGAACGTTCG	1
CTGATATATAA	1
CTCCGTTAATA	1
CGGGGATATGC	1
ACGTGATAAGC	1
CTGAGTTTCGA	1
CTGATATAAAC	1
CGGCGTTTATT	1
CTGATCTATAC	1
CGGCGTTATTG	1
CTCGGATATGC	1
CTCAGATAAAT	1
CAGATATAAAA	1
CGGCGATAATT	1
ATTGGTTTATT	1
CGGATATAATT	1
CTGACCTCCTT	1
CTCAGATAAAA	1
CTGACCAGCCG	1
CGGAGATAGTT	1
CTGAATCTTGA	1
CTGAGTTGATA	1
CTGAATCAACG	1
CTCACTGCACT	1
CTACGCTTAAC	1
CGGAGATAATC	1
ATGCGCTTAAC	1
CTATGTTTATT	1
ATGATTAAAAT	1
CGGAGATAAGT	1
ATGAGATCATT	1
CGGAGATAAAT	1
ACTGGACATTC	1
CGGAGAGAATT	1
CTGAAAAAAAT	1
CGCAGATAATT	1
ACCTGTTAGCT	1
CTGCAAAAGAA	1
CTCGGTTAGGT	1
CTGAGTTATAG	1
CTGAGATCCGT	1
CTGAGAGAAAG	1
CTGACTCTGAT	1
CTGAGACTCGC	1
CAGCGTTTATT	1
CCGTAATATAT	1
CTGATCTAAAA	1
CTGAGACTAAC	1
CTGCAGTAAGT	1
CTGAGACGAGA	1
CTGACCTTCTG	1
CTGAGACATTA	1
CACCCGTTAAA	1
CTCTGATACAT	1
ATGTTATACAT	1
CTATGATACAT	1
ATGTGATATGC	1
CTGCATAAACG	1
CTCGGACATTA	1
CTGAGAATTTT	1
CTCGAATAAAC	1
CTGAGAAGTCC	1
CTGAGCCACAG	1
CTGAGAAGCAA	1
ATGGGTTAGGA	1
CTGATTTAAAA	1
CTGATATAATA	1
AAGATAGAATT	1
CTGAGATATAT	1
AAGAGATAATT	1
ATGGACTAAAG	1
CTGATTCTCGG	1
ATGCTTTAATA	1
CTGATGGGCGT	1
CTGAACTAAAG	1
CCGCGCTACAA	1
ATGCGTAAATA	1
CTGAGAAAACT	1
CTGAAATATAT	1
CTCTGATACGT	1
ATGCATCAACG	1
CTGAGCTTTTT	1
ATGATATAATT	1
CAGTGATTTTC	1
ATGAGTTATAT	1
CTGAGCTTTTC	1
CTGATATCAAA	1
CTGACTTTTTT	1
CTGATATAAAT	1
CTGACTTTGGC	1
ACTCGACACCC	1
CAGTGAAACGT	1
CTGAAAAACAT	1
CTGACTTTGCA	1
CTGAAAAAAAC	1
CTATAATATAT	1
ACGAGAGAATT	1
CAGGGTTAGGT	1
CTGCATCCTAT	1
CAGGGCTACGA	1
CAGGGATTTTC	1
CTCTGATACTT	1
CTGAGTACCCG	1
CTCGGCTACGA	1
CTGCGTTTTGG	1
CTGGGACTTTC	1
CTGCGCAAGAA	1
CTGGGATGAGA	1
CTGGCGTTAAC	1
CTGGCTTTGGC	1
CTGCGCTAAAA	1
CTGCGTTATGG	1
CTGCGATATAT	1
CTGGAATAACC	1
CTGGGATACGT	1
CTGGGACTGGG	1
CTGGCATAAAC	1
CTGGACAACAT	1
CTGGGCTAAGA	1
CTGGAATAAAG	1
CTGGCGTTAGA	1
CTGGGATCTGC	1
CTGCGATTCCG	1
CTGGCTTTGCT	1
CTGGAGTGAAC	1
CTGGCGGTAAA	1
CTGCGACACGC	1
CTGGGACTCCG	1
CTGCCTCTACA	1
CTGGCTTTATT	1
CTGGGCAACGA	1
CTGGAAGAAAC	1
CTGCGCTAGAC	1
CTGCGTTACTA	1
CTGGACCAAAG	1
CTGCGTTACGA	1
CTGGATTAAAC	1
CTGCGTTACCC	1
CTGCGCGACAA	1
CTGGCCTTACA	1
CTGGGACATAA	1
CTGGGATCGTT	1
CTGCGATTTCT	1
CTGGGATAGTC	1
CTGCGATATTG	1
CTGGAACAGTG	1
CTGGGACACTA	1
CTGGGACGAGA	1
CTGGAGGGCGT	1
CTGGCCTCAGC	1
CTGCGACTCGA	1
CTGGACTAAAA	1
CTGCGAATAAT	1
CTGGCCTACTC	1
CTGCCTCTGGT	1
CTGGAAATAAC	1
CTGCGTTCATA	1
CTGCGTCTCCA	1
CTGGACGGCGT	1
CTGCGTCTATA	1
CTGGGATATGG	1
CTGGACGTTCG	1
CTGGCAGTTCG	1
CTGGCTTTAAT	1
CTGGAATACAC	1
CTGGGACCTTA	1
CTGCGTTTTCT	1
CTGCCGGTATC	1
CTGCGTTTTAT	1
CTGCCCTCATC	1
CTGCGCTAATC	1
CTGCCCAGAAC	1
CTGCGCTAAAC	1
CTGGGAATTTC	1
CTGGACAATTG	1
CTGGACTAAGG	1
CTGGGATTGTC	1
CTGGCTTTAAG	1
CTGCGTTTAGT	1
CTGCATTATCC	1
CTGCGCAAGCG	1
CTGGGAGTAAG	1
CTGCGTTTAAC	1
CTGCGGTAATA	1
CTGCGTTTAAA	1
CTGGGAGTAAA	1
CTGCGATTAAC	1
CTGGCTTGACG	1
CTGCGTTGTTG	1
CTGCGGCTGCG	1
CTGGATCAACG	1
CTGCGGCCTAT	1
CTGCGATACGA	1
CTGCGGAATAT	1
CTGGGACACGA	1
CTGCTTCAACG	1
CTGGGATAAGC	1
CTGGGATTTGC	1
CTGCGACTCTA	1
CTGGCCCAATT	1
CTGCGACATTT	1
CTGGGATTTCT	1
CTGCGAATGCA	1
CTGCGCTTAAG	1
CTGCGAAAGTT	1
CTGGCCAGACC	1
CTGCCTTGTTG	1
CTGGCCAATAC	1
CTGGACTTCAA	1
CTGGAATATAC	1
CTGCCTCAACG	1
CTGCGCTCCAA	1
CTGCCGTTAAA	1
CTGGCATTTCT	1
CTGGGATAATA	1
CTGCGTCAACG	1
CTGCCCGAAAT	1
CTGCGTATTTG	1
CTGCCCACCGA	1
CTGCGTAGAGC	1
CTGCATTTGGT	1
CTGGCCCTTTG	1
CTGCATTTCTT	1
CTGCGTAATTA	1
CTGGACTAAAT	1
CTGCGTAAATA	1
CTGGGATTTTG	1
CTGGCCCTCTT	1
CTGGGAATACT	1
CTGCGGTATAC	1
CTTCGTTATAC	1
CTGGGTGCCAT	1
CTGTGACACCG	1
CTGTGTGCATC	1
CTTGAATAAAA	1
CTGTCCTGGAT	1
CTGGGTTGATT	1
CTGTCCTCTCT	1
CTGGGTTACGT	1
CTGTCCTCGTT	1
CTGTCTTTTCC	1
CTGTCCTATTC	1
CTGTTCCACTG	1
CTGTGATTATT	1
CTGTGTTTTGT	1
CTGTGATTAAA	1
CTTGTTTAGGT	1
CTGTCCGGGGA	1
TTGCGTTATTG	1
CTGTCCGGCCC	1
CTGGGTTAAGT	1
CTGTCCGACCC	1
CTGGGTCTAAA	1
CTGTCCCTCCT	1
CTGTCTTTCTT	1
CTGTCCCCCTA	1
CTGTCTGTTTG	1
CTGTGTCTATT	1
TTGGACTAAAG	1
CTGTCCCAGCA	1
CTGTGACTCGC	1
CTGTCCATTCA	1
CTTTAATATAT	1
CTGTGATCTGG	1
CTGTGCTATTC	1
CTGTCCAGCTG	1
CTGGGTTATTG	1
CTGTCATACGT	1
CTGTGACAACC	1
CTGTCAAACGT	1
CTGGGTTAGGA	1
GTGGGATTTTC	1
CTGTTTTTATA	1
CTGTATTTATC	1
CTGTGAAACGT	1
CTGTGTCGAAG	1
CTGTGAAACCA	1
CTGTGATATTC	1
CTGGGTCAGGT	1
CTGTGTCATGC	1
CTGGGTAAGGT	1
TTGCGCTACAA	1
TTGTAATATAT	1
CTGTATATAAT	1
CTGGGGAATCC	1
CTGTGTCAGGC	1
CTGGGCTTAAA	1
CTGTAGCCTAT	1
CTGGGCTATAC	1
GTGCGTTAATA	1
CTGTCGTTGGC	1
CTGTGATATCA	1
CTGTGACTTCC	1
CTGTGTATATT	1
CTGGGTTTACA	1
CTGTGATAGGC	1
CTGTGCTTAAC	1
CTGTGATAGAT	1
GTGTGATACAT	1
CTGTAAGATAT	1
CTGGGTTGAAA	1
TTGCATTGCGG	1
CTGTGTTATTT	1
CTTCGCTATAC	1
CTGTGACAGGG	1
CTGTAAAAAAA	1
TTGGAATAAAC	1
CTGGTTTTTGT	1
CTTCATCAACG	1
GGGAGATAATT	1
CTGTGAATCAG	1
CTGTTATACAT	1
CTTGGTCTATC	1
CTGTGGTTTGT	1
TTGTGTTTATT	1
GCGCGATATAT	1
CTGTGAAATCC	1
CTGTGGTACGT	1
CTGTGAAAGTT	1
CTGGTGCGGAG	1
TTGGCGTTAAA	1
CTGGTCTACTA	1
CTGGGTGGCCT	1
CTGTGGTACAT	1
CTGTGAAACGG	1
CTGGTCCATTG	1
CTGGGTCTATC	1
CTTATATAAAA	1
CTGTGCCGTTT	1
CTGGTATCTGC	1
CTGTGCCCTCT	1
GAGTGATAATA	1
CTGTCTTTGTT	1
CTGTGATACAA	1
CTGGGTAAAAA	1
CTGGGTTTTTT	1
CTGTGCAACGA	1
GTGTGATACGT	1
CTGGGGTACAG	1
CTGTGATAATA	1
CTGTCTTCCAA	1
CTTCGCTACAA	1
CTGGGCTTTTC	1
CTGTGCTTCTG	1
TTGGGATTTTC	1
CTGGGTTTGCG	1
CTGTCTGCCCT	1
CTGTGAGTAGT	1
CTTCGTTATTT	1
CTGTGAGATCC	1
CTGTCTCTGTT	1
CTGTGAGAGTT	1
CTGTCTATTTG	1
CTGTGAGACGT	1
CTGTCGTTAAA	1
GAGCGCTATAG	1
CTGTCCTTCTT	1
GAGAGATAATT	1
CTGTCCTTGGG	1

## Sheet: HpiCas9 PAM_counts
7mer	counts number
CTGGCAAGTTC	37067
CTGACCAAGCA	29367
CTGACAGAAAA	26066
CTGACAAAAAA	25033
CTGGCCTAAGG	17608
CTGACCAAGTA	16909
CTGTCTATTCC	16161
CTGGCAAAAGC	14887
CTGCCCAAAGG	13929
CTGTCTTATGG	7959
CTGGCCAATAC	7037
CTGTCCCAAAT	2472
CTGGGTTTATT	2364
CTGACCAAAAC	1346
CTGTCCTATTC	1304
CTGACCTTCTG	1124
CTGACTTAAAA	1002
CTGCAAAAAAT	870
CTGTACAAAAT	819
CTGCACCGGAG	584
CTGGGATATGC	371
CTGGCCCAATG	63
CTGTCATATCG	41
CTGTCTATTCA	33
CTGACAGAAAG	33
CTGGTAAGTTC	32
CTGACAAAAAG	27
CTGTCTATTTG	26
TTGACCAAGCA	25
CTGGCCTAATG	25
CTGTGAAACGG	24
CTGACGGAAAA	23
CTGACCAATCA	23
CTGGCAAAAAA	22
CTGACCTTATC	22
CTGACAAGTTC	20
CTGACCCAATG	20
CTGACAGACAA	20
GGCTCGATACT	19
CTGGCAAGTTA	18
CTGCACGTGAT	18
CTGAGATAATT	18
ATGTCTATTCC	18
CTGACCAAACA	17
CTGATAGAAAA	16
ACGTACAAAAA	16
CTGAGAAATGT	16
CTGACCAAGAA	16
CTGGCAAAGGC	15
CTGCGCACGCG	15
CTGTACAAAAA	14
CTGGCCAAGCA	14
CTGTCTTTATT	13
CTGGCGAGTTC	13
CTGCCGAATTT	13
CTGACAAGAAA	13
CTGACATAAAA	13
ATGCCCAAAGG	13
CTGCATTTTGG	13
CTGACAGAGAA	13
CTGCCAATTGT	13
CTGACAGCTTC	13
CTGAGCAAGCC	12
ATGACCAAGTA	12
CTGGCAAAAGA	11
CTGTCAAGTTC	11
CTGGAAAGTTC	11
ATGACCAAGCA	11
CTGACAGAATA	11
CTGACCAAAAA	11
CCGACCAAGTA	11
CTGGCATAAGG	10
ATGACAAAAAA	10
CTAACCAAGCA	10
CTAGCAAGTTC	10
CTAACAGAAAA	10
CTGACAAAGCA	10
CTGTCTATTAC	9
CTGGACAAGTC	9
CTGTCTGTACT	9
CTGGCAGAAAA	9
CTGGACTAAGG	9
CTGACAAAAGA	9
CTAACAAAAAA	9
CAGCCCAAAGG	9
ATGGCAAGTTC	9
CTGACAGTAAA	9
CTGTGTTTTTT	8
CTGGATTTTCA	8
CTGGCAAGTAC	8
CTGGCAAAAAC	8
CTGGCGAAGTT	8
CTGTCATGTAC	8
CTTACAAAAAA	8
CTGGCAAGTCC	8
CTGTCCTAAGG	8
CCGCCCAAAGG	8
CAGTCTATTCC	8
CTGACACAAAA	8
CTGACCGAGCA	8
CTGATAAAAAA	8
CCGACAGAAAA	8
CTGCATTCTCC	8
ATGGCCTAAGG	8
CTGACCAAGCT	8
CTGCCCAAAGT	8
CTGGCAAGCTC	7
CTGTGGTTTGT	7
CTGGCAATTTC	7
CTTGCAAAAGC	7
CTGGCCATGGT	7
CTGGCAAAAGT	7
CTGGCCTAGGG	7
CTGGCAGGTTC	7
CTGGCTATAAC	7
CTGGTCAATAC	7
CCGGCAAAAGC	7
CTGACAGGAAA	7
CTATCTTATGG	7
CTGAATTTAGT	7
CCGGCAAGTTC	7
CAGACAGAAAA	7
CTGCCAGATGC	7
CTGACATTTTC	7
CTGACCAGGCA	7
CTGACATGTAC	7
CTGGCTATCGG	6
CTGGATATGCG	6
CTGTCTACTCC	6
CTGGAAAAAGC	6
CTGGCCCAAGG	6
CTGGTAAAAGC	6
CTGGGAATTTT	6
CTGGCATTGCT	6
CTGTCTAGTCC	6
CTGTCAAAAGC	6
CTGTCTCATGG	6
CTGTCACATCT	6
CTGTTTATTCC	6
CTGCCCTTTGT	6
CTGAACAAGCA	6
CTGCATTTAGT	6
CCGACAAAAAA	6
CTGACAAAGTA	6
CTGACCTAAGG	6
CGGACAGAAAA	6
CTGACAAAAGC	6
CTGACAGAAGA	6
ATGGCCAATAC	6
CTGCCCAATGG	6
CTGACAAAGAA	6
ATGACAGAAAA	6
CTGGCCTAAGT	5
CTGTCTTATTG	5
CTGGCAAGTTT	5
CTGGCCAAAGG	5
CTGTGTTCTCT	5
CTGGCCAATAT	5
CTGCCTTAAGG	5
CTGTCCAAATT	5
CTGTCTTATGT	5
CTGTCTATCCC	5
CTGGCAGAAGC	5
CTGTCCAATGG	5
CTGGTCTAAGG	5
CTGTCTATTCT	5
CTGTCCTATGG	5
CTGCCTTTGTC	5
CTGGCAAAATC	5
CAGACCAAGCA	5
CTGACTTTCAG	5
CTGACAGAACA	5
CTGCCCTTTCG	5
CTGCCATTTCT	5
CCGACCAAGCA	5
CCGTCTATTCC	5
CTGATCAAGTA	5
CTGCCAAAAGG	5
CTGACGTATGC	5
CTAGCAAAAGC	5
CAGACAAAAAA	5
CTGACCACAAC	5
CTGAACAAATT	5
CTGCCCACAGG	5
CTGACCAAGCG	5
ATGGCAAAAGC	5
CTGACCACGTA	5
CTGCCTCCAAC	5
CTGACCAAAGG	5
CTGTCCTTATA	4
CTTGCAAGTTC	4
CTGGCAAAGAC	4
CTGTCTATGAA	4
CTGGCACGTTC	4
CTGGCCTAAGA	4
CTGTGTTTATT	4
CTGCGTGGAAT	4
CTTACCAAGCA	4
CTGTCAAAAAG	4
TTGTCTATTCC	4
CTGGGTTTGGT	4
CTGGCAAGATC	4
CTGGCAAATGC	4
CTGTCTAATCC	4
CTGTCCCAATG	4
TTGACAAAAAA	4
CTGTCAAAATC	4
CTGGCTTACGT	4
CTGTCTTATGA	4
CTGGCAAGTGC	4
CTGGCAAATTC	4
CTTGCCTAAGG	4
CTGGCCAAGTA	4
CTGTCAATATC	4
CTGTCTACTAT	4
CTGGGTTTACT	4
CTGTATATAAT	4
CTGCCCAAATG	4
CTGATCAAGCA	4
CTGACAATCGG	4
CAGGCCTAAGG	4
CCGTCTTATGG	4
CTGACAAAATA	4
CTGACTAAGCA	4
CTAACCAAGTA	4
CTGAGCGTACC	4
CTGACCGAGTA	4
CTGCACAAAGG	4
CTGACCTAGCA	4
CTGCCATCTTC	4
CTGACAACCAA	4
CTGACGAAGGG	4
CTGCCTATGGA	4
CTTTCTATTCC	3
CTGTCTTCCAA	3
CTGGCCAATAA	3
CTGGCAAGAGC	3
CTGGCCGATAC	3
CTGGCTACTTC	3
CTGTCTACAAA	3
CTGGCTAGTTC	3
CTGTCTCTTCC	3
CTGGCTTAGAC	3
CTGGCCGACCT	3
CTGGCAATCGC	3
CTTACCAAAAC	3
CTGTAAAATCC	3
CTGTCGACCGT	3
CTGTACCAAAT	3
CTGTCTATACG	3
CTGTACTGATC	3
CTGTCTATTTT	3
CTGGCACATTC	3
CTGTCTTACGG	3
CTGTATTATGG	3
CTGTCTTGTGG	3
CTGGATTTACA	3
CTGTCTTTGGT	3
CTGTCAATAGC	3
CTGGCCGTCCT	3
CTGTCACTCCC	3
CTGGCCTATGG	3
CTGTCAGTTTG	3
CTGTCGAAGAT	3
CTGGCCTTAAA	3
CTGCATTTCTA	3
CTGACCATGAC	3
CTGCCAGTTAT	3
CTGACCGAAAA	3
CTGCCCTAGGT	3
CTGACCTAAAC	3
CTGAACAATTG	3
CTGACGAAAAA	3
CTGCCCAAAAG	3
CTGACGGAGTT	3
CTGACAAAAAC	3
ATGTCTTATGG	3
CTGACCAGGTA	3
CTGACCAATAC	3
CAGGCAAGTTC	3
CTGACCAACAC	3
CTGCCAGTACA	3
CTGACAGAAAC	3
CTGACATTTCT	3
CTGAGTTTTAC	3
CGGACCAAAAC	3
CTGACCATGCA	3
CTGCCCAAGGG	3
CTAGCCTAAGG	3
CTGCCCATAGG	3
CTATCTATTCC	3
CGGACCAAGCA	3
CTGAACAAAAC	3
CTGACAGAAAT	3
CTGTCGTTACC	2
CTGTGTTTCCC	2
CTGTCTGTTGT	2
CTGGGTTTAAT	2
GTGACCAAAAC	2
CTGGGTTTATC	2
CTGTCTATCGC	2
CTGGGTTTGTT	2
CTGGGCTTACG	2
CTGGCAATACA	2
CTGGCCTACTT	2
CTGGCAATAGC	2
CTGTCCTATCG	2
CTGGTCTAACG	2
CTGTCTATAAC	2
CTGGCACAGAC	2
CTGTCTCGCGT	2
CTGGCTAATAC	2
CTGCTCAAAGG	2
TTGGCAAGTTC	2
CTGTGTCAGCT	2
CTGTATATTCC	2
CTTACAGAAAA	2
CTGGCGAAAGC	2
GCGGCCACATT	2
CTGGCACTCTA	2
TCGGAGATCAA	2
CTGTCAAATCC	2
CTGGCTCTATA	2
CTGCCTTAGGC	2
CTGGCCAAGAC	2
CTGTCAATGTA	2
CTGTCTATACC	2
CTGTCACAAAT	2
CTGGCAAATAC	2
CTGTCACATCG	2
CTGTCTCTGGC	2
CTGTCATAGTT	2
CTGGGAAACTA	2
CTGGCAGTCTT	2
CTGCCTTTGTA	2
CTGTCCAAAGG	2
CTGTGCTAACC	2
CTGGCATACCC	2
CTGGCCTAAAG	2
CTGTCCAACGA	2
CTGGCCTAAGC	2
CTGTCCAATAC	2
CTTCCCAAAGG	2
CTGGCATCACC	2
CTTGCCAATAC	2
CTGTCCATGGG	2
GGCTCGAGACG	2
CTGGCATCTAT	2
GTGTCTATTCC	2
CTGCGTCAAAG	2
TTGACAGAAAA	2
TTGCCCAAAGG	2
CTGTCTAATGG	2
CTGACGTAACA	2
CTGCCTCAGGA	2
CTGACTTACAA	2
CTGCCTAAAGG	2
CTGAACGGGGA	2
CTGACAAAAAT	2
CTGCCCAAAGA	2
CTGACAACAAA	2
CTGACTTTATC	2
CTGAGCATACG	2
CTGCCAAGTAT	2
ATGGGTTTATT	2
CTGAACGTAAA	2
CTGAGTTAGTT	2
CTGACAAATAC	2
CGGACCAAGTA	2
CTGACAATAAA	2
CTAGCCAATAC	2
CTGACTTAGGT	2
CTGACCAACCA	2
CTGACTTTCGG	2
CTGACAAAGAC	2
CTGACAAGGCG	2
CTACCCAAAGG	2
CTGCCAATGCC	2
CTGATCTATTA	2
CTGCCACATGT	2
CTGACCCAGTA	2
CTGACCATTCG	2
CAGTCTTATGG	2
CTGACCATATC	2
CTGCACAGGAG	2
CTGACAAAACC	2
ATGTCTATTCA	2
CTGACTATTCC	2
CTGAAAGAAAA	2
CTGCCCAACGG	2
CTGCACTTATA	2
ACGAGAAAACT	2
CTGACCAAGTG	2
CTGCCCAGAGG	2
CTGACGAGGCT	2
CTGACCAACTA	2
CTGACGATGGG	2
CTGCCTATGGC	2
CTGCATTTGAC	2
CTGACTTTTTT	2
CTGACGATTGG	2
CCGGCCTAAGG	2
CTGACACGAAA	2
CTGACCAAAGT	2
CTGACCAAACC	2
CTGTCATCTTG	1
CTGTCAGCCGG	1
CTGGCACAATT	1
CTGTCATTTTT	1
CTGGCAACTCT	1
CTGGCCTTCCT	1
CTGGCCGACAT	1
CTGTACGAAAT	1
CTGGCTATGAA	1
CTGGACAATAC	1
CTGTCATAAGC	1
CTGTCCAACTT	1
GGCGCAGAGGA	1
CTGTCCAAGTA	1
CTGTCTTATCA	1
CTGGACGTAAA	1
CTGTCTTGGTG	1
TTGGCCAATAC	1
CTGCGCGAACT	1
CTGTCCAGCTC	1
CTGTCACTCCT	1
CTGTCCATACA	1
CTGTTCCAAAT	1
CTGTCCATGAA	1
CTGGGTTTATA	1
CTGGCGAAACA	1
CTGGGTTAGTT	1
CTGGCGAAGGC	1
GGCTCGGATCA	1
CTGTCCCAAGT	1
CTGTCATTCGT	1
CTGGCATTCTC	1
CTGGCAAATGT	1
CTGTCCCACAT	1
CTGTCTTCTGG	1
CTGTCCCAGAT	1
CTGTCTTGTTT	1
CTGTCCGTCCT	1
CTGTCTTTGTT	1
CTGGTCAATCC	1
CTGTGCATACA	1
CTGTCCTAATC	1
CTGTGGTTTGC	1
CTGTATTATTG	1
CTGTGTTTACT	1
CTGCCTTGTTG	1
CTGTGTTTTCC	1
CTGGCATTGTA	1
CTGTTTTATGG	1
CTGGCATTTCA	1
CTGGCAACTAC	1
CTGGCCAAAAC	1
CTTGCAAGTAC	1
CTGTCCTTTTC	1
CTGGGTGCAAA	1
CTGCCTTACTG	1
CTGTCATCAAA	1
CTGTCGAAGTC	1
CTGTCATCCGC	1
CTGTCGAATTA	1
CTGTCATCGAA	1
CTGTCGACCGG	1
TCGGAGTGACA	1
CTGGCTGTACA	1
CTGTCATTCTA	1
CTGTCGGAAGA	1
CTGGCAACTTC	1
CTGTCGTCCGT	1
CTGGCCCATAC	1
CTGCGCAAGCG	1
CTGGAAATTTC	1
CTGCCTTATGG	1
CTGTCTTGGCG	1
TTGACCAAGTA	1
CTGGGACTACG	1
CTGGGTTCATT	1
CTGTCTTTATA	1
CTGGCTGTTAC	1
CTGGGCTAAGG	1
CTGTCAAAGAT	1
CTGTCTTTTGG	1
CTGGCAAAATA	1
CTGTGATATTC	1
CTGCGTTATCC	1
CTGTGCATATA	1
CTGCGCAAACA	1
CTGTGCTTATC	1
CTGTCAACTCA	1
CTGGGTATATC	1
CTGCCTTTGCG	1
CTGTCAGAAGC	1
CTGGCGAACGT	1
CTGCTCGAATT	1
CTGTAAAAAAA	1
CTGTGTTTGTT	1
CTGTCTATCGT	1
CTGGCTATTCT	1
CTGCGTTATCG	1
CTGGCAACACT	1
CTGCGTTTAAT	1
CTGGCAACAGC	1
CTGGCCAATGC	1
CTGGGTCTATT	1
CTGGCCACTAC	1
CTTACCAAGTA	1
CTGGCCAGTTC	1
CTGTACACAAT	1
CTGGCCATGAC	1
CTTGCAAGTTA	1
CTGGCTTCTTC	1
CTGTCATATTC	1
CTGGAAAAATA	1
CTTGGTTTATT	1
CTGGCAGCGGG	1
GAGTCCAAATC	1
CTGTAAAAAGC	1
GCGGCCATAAG	1
CTGTCTCTGTT	1
GGCGGCAAAAC	1
CTGTCTCTTCA	1
CTGGCCTATTC	1
CTGGCTTTTCA	1
GTGACAGAAAA	1
CTGTCTGCCGG	1
GTGGCAAGTTC	1
CTGGCCATTTC	1
CTGCGTATTTT	1
CTGTCTGTCCG	1
CTGGCCTCAGG	1
CTGTCTGTTCC	1
CTGGCCTGAGG	1
CTGTCAATTCC	1
CTGTCAATTTC	1
CTGTCTAATTG	1
CTGTCCTACTC	1
TTGGCCTAAGG	1
CTGTATATTAC	1
CTGCCTGCTCG	1
CTGTATATTCA	1
CTGCCCTATTC	1
ACTGAGGTCAG	1
CTGACATCATA	1
CTGACCCAAAA	1
CTGCCCAAACC	1
CTGACCCAAAC	1
CTCACCAAGCA	1
ATGAACATAAC	1
CTGAAAAAAAC	1
CTGACCCAGCA	1
CTGACCAAATC	1
CAGACCAAAAC	1
CTGACCAAGTT	1
ATGCCTATGGA	1
ATTTCTATTCC	1
CTGACAAAGGA	1
CTGACATACGG	1
CGGACCAATAC	1
CTCTCTATTCC	1
CTGACAAATAA	1
CTGCCAAAAAT	1
CGGAGATAATT	1
CTGACCAAATA	1
CTGACCTAATG	1
CTGCCAGTTCC	1
CTGACCTACTG	1
CTGACCAAGGA	1
CGGGCAAGTTC	1
CTGCCCCAAGG	1
CTGACCTAGTA	1
CTGCCGAAGAG	1
CGGGGTTTATT	1
ATGCCAAAAGG	1
CTGACCTTATG	1
CTGACATACAC	1
CTGACCTTCAG	1
CTGCACAAATC	1
CTGACCTTCTA	1
CTCGCAAGTTC	1
CTGACAACTTA	1
CTGAAAAAAAA	1
CTGACAACTTC	1
ATGGGATATGC	1
CGGTACAAAAT	1
ATGACAAAGTA	1
CTGACGAAGTA	1
CTGCCAATGTT	1
CTGACGAATGG	1
CTGCCAGATAC	1
CTGACGAATGT	1
CTGAACAATCA	1
CTGACAAGAGA	1
CCGGCCAAGTA	1
CTGACGAGGGG	1
ACGTCCTAGGG	1
CGGTCTATTCC	1
CTGACCAAGTC	1
CTGACGATTCA	1
CCGTACAAAAT	1
CAGAGAAATGT	1
CTGCCCTAGAG	1
ATGACCAAAAA	1
CCGTCCTATTC	1
CTGACAATATA	1
CTGCCGCTGCT	1
CTAACCAAACA	1
CTGCCTACTTG	1
CTGACAATTCC	1
CTGACAAACAA	1
CTGACGTCCGT	1
CTGATCTTACC	1
CTGACAATTGG	1
CTGCAAAAAGT	1
CTGACTAAGTA	1
CTGCACAAAGT	1
CTGACAATTTC	1
CTGACATAGTG	1
CTGACTCTTCT	1
CTGCACCGGCG	1
CTGACTGAAAA	1
CTGACATTCTG	1
CTGACTGCACT	1
CTGCATTTAGA	1
CAGGACCGGAG	1
CTGCATTTCGC	1
CTGACTTAAAG	1
CTGCCTCATCA	1
ATGGCAAGTAC	1
CTGCATTTTTG	1
ACGGAAATCCA	1
CTGCCAAAAGC	1
CTGACTTATGG	1
CTGCCAACCGG	1
ATGACCAAAAC	1
ATGTATATTCC	1
CAGTCACAAAT	1
ATGACCTTCTG	1
CAGTCGATTTG	1
CTGCCACTTTG	1
ATGACCAAGAA	1
CTGCCAGATCG	1
CTGAGAAAAAA	1
CTGCCAGCGTT	1
ATGACAAAAAT	1
CTGAACAATGG	1
CTGAGAACTGT	1
ATGACTATTCC	1
CTGAGAGAAAA	1
ACGGCCTAGGG	1
CTATCCCAAAT	1
CCGGCCAATAC	1
CTGAGATCATG	1
CTGAACTAAAC	1
CTGAGCAACGC	1
CTGAATCTATC	1
ATGGCCTAAGT	1
ATGACTTAAAA	1
CTGAGCAAGTA	1
CCGGGTTTATT	1
CTATCTCTTCC	1
CTGCCCATCGC	1
CTGACAGCAAA	1
CTGCCCTACGA	1
CTGAGCTTATC	1
CTGACCAATTA	1
ATGGCCTAATG	1
CCGTCCCAAAT	1
CTCACAAAAAA	1
CTGCCGAAGAA	1
CTGACAGGAAT	1
ATGTGCAATGC	1
CTGACAGGAGG	1
CTGCCGTAAAG	1
CTGATCAAAAC	1
CTGCCTAATTT	1
CTCACCAAAAC	1
CCGTGTTTTTT	1
CTGACAGTGCC	1
CTGCCTATTCC	1
CTGATCATAGG	1
CTGACAAACTT	1
CTGATCTATGC	1
ACGACAAATTG	1
CTGACCAAAAT	1

[truncated: 18 more sheets: HspCas9 PAM_counts, MgrCas9 PAM_counts, Nan1Cas9 PAM_counts, Nan2Cas9 PAM_counts, NarCas9 PAM_counts, NbaCas9 PAM_counts, NdeCas9 PAM_counts, Nme2-SmuCas9 PAM_counts, Nsp2Cas9 PAM_counts, Nsp2-SmuCas9 PAM_counts, OorCas9 PAM_counts, PaeCas9 PAM_counts, PmaCas9 PAM_counts, PstCas9 PAM_counts, PutCas9 PAM_counts, RpnCas9 PAM_counts, SinCas9 PAM_counts, SmuCas9 PAM_counts]
