# Supplementary material for: Closely related type II-C Cas9 orthologs recognize diverse PAMs
Source: eLife. 2022 Aug 12;11:e77825. doi: 10.7554/eLife.77825 (PMC9433092; doi:10.7554/eLife.77825)
Supplement: Figure 3—figure supplement 1—source data 1. [file elife-77825-fig3-figsupp1-data1.xlsx]

## Sheet: Sheet1
	The effect of spacer length on the efficiency of Nsp2Cas9 editing.
		Nsp2Cas9
		Repeat 1	Repeat 2	Repeat 3	Average	Stdev
	G18	0.25	0.25	0.26	0.25	0.0057735
	G19	0.32	0.32	0.4	0.32	0.046188
	G20	0.4	0.49	0.42	0.445	0.0472582
	G21	3.15	3.55	3.19	3.35	0.220303
	G22	8.17	8.16	7.51	8.165	0.378197
	G23	7.88	7.76	7.38	7.82	0.261024
	G24	7.84	7.91	6.71	7.875	0.673523
	G25	7.36	6.89	6.17	7.125	0.599361
	G26	6.98	7.3	7.41	7.14	0.223383
