# Supplementary material for: Closely related type II-C Cas9 orthologs recognize diverse PAMs
Source: eLife. 2022 Aug 12;11:e77825. doi: 10.7554/eLife.77825 (PMC9433092; doi:10.7554/eLife.77825)
Supplement: Figure 3—figure supplement 2—source data 1. [file elife-77825-fig3-figsupp2-data1.xlsx]

## Sheet: Sheet1
	Figure 3-figure supplement 2-source data 1. Nsp2Cas9 enables genome editing in diverse cell types, including (A) HeLa, (B) HCT116 , (C) A375, (D) SH-SY5Y and (E) N2a cells.
		HeLa							HCT116
		Repeat 1	Repeat 2	Repeat 3	Average	Stdev			Repeat 1	Repeat 2	Repeat 3	Average	Stdev
	A2	6.7	10.6	7.3	8.2	2.1		A2	0.9	0.92	0.99	0.936667	0.0472582
	A3	2.5	2.5	3	2.66667	0.288675		A3	1.3	1.21	1.31	1.27333	0.0550757
	A4	3.9	5.1	4.1	4.36667	0.64291		A4	1.3	1.32	1.55	1.39	0.138924
	A7	13	11.1	13.7	12.6	1.34536		A7	0.8	0.74	0.7	0.746667	0.0503322
	A15	4.4	4.7	4.6	4.56667	0.152753		A15	0.7	0.51	0.47	0.56	0.122882
	A19	3.7	3.1	2.8	3.2	0.458258		A19	2.9	2.99	3.58	3.15667	0.369369
	A27	1.5	0.3	0.2	0.666667	0.723418		A27	0.6	0.54	0.42	0.52	0.0916515
	A30	11.7	18.7	13.4	14.6	3.65103		A30	0.2	0.24	0.31	0.25	0.0556776
	A41	0.9	1.2	1.5	1.2	0.3		A41	0.3	0.3	0.31	0.303333	0.0057735
	A46	32.1	38.7	40.2	37	4.30929		A59	19.7	20.12	4.89	14.9033	8.67434
	A59	11.9	15.4	13.1	13.4667	1.77858		V60	0.3	0.48	0.42	0.4	0.0916515
	V60	7.3	8.3	6.3	7.3	1		G1	0.3	0.33	0.43	0.353333	0.0680686
	G1	8.9	10.3	9.1	9.43333	0.757188		G5	22.4	14.74	20.84	19.3267	4.04803
	G5	28.9	25.3	23.1	25.7667	2.92803
		A375							SHSY5Y
		Repeat 1	Repeat 2	Repeat 3	Average	Stdev			Repeat 1	Repeat 2	Repeat 3	Average	Stdev
	A2	1	0.86	1.09	0.983333	0.115902		A2	2.4	2.9	2.7	2.66667	0.251661
	A3	1.29	0.85	1.33	1.15667	0.266333		A3	1.8	1.4	1.5	1.56667	0.208167
	A4	2.81	2.87	2.12	2.6	0.416773		A4	2.2	2.3	2.4	2.3	0.1
	A7	2.53	6.67	2.83	4.01	2.30851		A7	8.7	9.3	12.5	10.1667	2.04287
	A15	1.45	1.13	1.9	1.49333	0.386825		A15	2.8	3.3	3	3.03333	0.251661
	A19	2.9	2.46	3.02	2.79333	0.294845		A19	3	2.9	3	2.96667	0.057735
	A27	1.35	1.89	0.87	1.37	0.510294		A27	1	2.1	0.4	1.16667	0.862168
	A30	0.21	0.37	0.35	0.31	0.087178		A30	5.3	4.7	5.7	5.23333	0.503322
	A41	0.26	0.33	0.47	0.353333	0.106927		A41	1.4	1.6	1.7	1.56667	0.152753
	A46	50.84	51.06	52.66	51.52	0.993378		A46	30.6	25.8	29.5	28.6333	2.51462
	A59	21.33	14.98	19.75	18.6867	3.30585		A59	14.6	10.1	8.3	11	3.245
	V60	1.24	1.63	1.71	1.52667	0.251462		V60	3.2	2.9	2.6	2.9	0.3
	G1	0.35	0.23	0.23	0.27	0.069282		G1	6.6	6	6	6.2	0.34641
	G5	41.45	46.73	38.82	42.3333	4.0283		G5	30.8	25.2	26.8	27.6	2.88444
		N2a
		Repeat 1	Repeat 2	Repeat 3	Average	Stdev
	mR4	11.12	12.86	4.59	9.52333	4.36007
	mR6	39.31	41.6	15.97	32.2933	14.1827
	Rosa26-1	51.16	48.5	24.13	41.2633	14.8974
	Rosa26-3	25.56	27.26	10.95	21.2567	8.96622
	Rosa26-5	11.23	14.49	4.5	10.0733	5.09445
	Th1	42.14	44.19	15.3	33.8767	16.1205
	Th2	24.2	22.3	6.38	17.6267	9.78612
	Th4	9.09	7.44	1.24	5.92333	4.13894
