# Supplementary material for: Closely related type II-C Cas9 orthologs recognize diverse PAMs
Source: eLife. 2022 Aug 12;11:e77825. doi: 10.7554/eLife.77825 (PMC9433092; doi:10.7554/eLife.77825)
Supplement: Figure 3—figure supplement 3—source data 1. [file elife-77825-fig3-figsupp3-data1.xlsx]

## Sheet: Sheet1
	Figure 3-figure supplement 3-source data 1. Schematic of the GFP-reporter assay for cleavage analysis is shown on the top.
		Repeat 1	Repeat 2	Repeat 3	Average	Stdev
	Nsp2Cas9	21.5	18.8	21.2	20.5	1.47986
	S597R	13.5	13.2	12.6	13.1	0.458258
	W600R	26.5	18.4	12.9	19.2667	6.8413
	S597R & W600R	23.7	18.7	20.4	20.9333	2.54231
