# Supplementary material for: Closely related type II-C Cas9 orthologs recognize diverse PAMs
Source: eLife. 2022 Aug 12;11:e77825. doi: 10.7554/eLife.77825 (PMC9433092; doi:10.7554/eLife.77825)
Supplement: Figure 3—figure supplement 4—source data 1. [file elife-77825-fig3-figsupp4-data1.xlsx]

## Sheet: Sheet1
	Figure 3-figure supplement 4-source data 1. Genome editing with NarCas9 for 10 endogenous loci in HEK293T cells.
		NarCas9
		Repeat 1	Repeat 2	Repeat 3	Average	Stdev
	TS1	11.04	8.32	10.93	10.0967	1.53962
	TS2	1.7	1.96	1.79	1.81667	0.132035
	TS3	9.89	7.89	10.94	9.57333	1.54946
	TS4	5.42	5.75	7.54	6.23667	1.14072
	TS5	13.9	13.17	13.22	13.43	0.407799
	TS6	1.21	1.25	1.33	1.26333	0.061101
	TS9	3.44	4.39	3.38	3.73667	0.566598
	TS10	0.28	0.27	0.28	0.276667	0.0057735
	TS12	0.32	0.28	0.38	0.326667	0.0503322
	TS13	14.95	18.38	19.99	17.7733	2.57419
	TS14	2.35	1.92	2.13	2.13333	0.215019
	TS17	7.55	7.65	9.05	8.08333	0.83865
