# Supplementary material for: Closely related type II-C Cas9 orthologs recognize diverse PAMs
Source: eLife. 2022 Aug 12;11:e77825. doi: 10.7554/eLife.77825 (PMC9433092; doi:10.7554/eLife.77825)
Supplement: Figure 3—figure supplement 4—source data 2. [file elife-77825-fig3-figsupp4-data2.xlsx]

## Sheet: Sheet1
	Figure 3-figure supplement 4-source data 2. Genome editing with NarCas9 for 9 endogenous loci in HeLa cells.
		NarCas9
		Repeat 1	Repeat 2	Repeat 3	Average	Stdev
	TS1	6.49	9.47	7.25	7.98	2.10718
	TS2	1.25	1	0.82	1.125	0.176777
	TS3	7.43	8.13	7.34	7.78	0.494975
	TS4	6.36	6.29	4.76	6.325	0.0494975
	TS5	12.13	12.07	12.27	12.1	0.0424264
	TS9	3.29	2.44	2.73	2.865	0.601041
	TS13	13.57	13.31	12.29	13.44	0.183848
	TS16	7.63	10.69	6.93	9.16	2.16375
	TS17	4.17	3.74	3.7	3.955	0.304056
