# Supplementary material for: Closely related type II-C Cas9 orthologs recognize diverse PAMs
Source: eLife. 2022 Aug 12;11:e77825. doi: 10.7554/eLife.77825 (PMC9433092; doi:10.7554/eLife.77825)
Supplement: Figure 3—source data 1. [file elife-77825-fig3-data1.xlsx]

## Sheet: Sheet1
	Figure 3C. Comparison of Nme2Cas9 and Nsp2Cas9 efficiency for genome editing at 19 endogenous loci.
	Figure 3D. Quantification of editing efficiency for Nme2Cas9 and Nsp2Cas9
		Nme2Cas9					Nsp2Cas9
		Repeat 1	Repeat 2	Repeat 3	Average	Stdev	Repeat 1	Repeat 2	Repeat 3	Average	Stdev
	A2	12.14	13.82	0.86	12.98	7.04772	19.46	14.05	2.25	11.92	8.80049
	A3	6.5	8.56	1.16	7.53	3.81923	9.11	7.81	2.05	6.32333	3.75746
	A4	5.3	10.26	1.8	7.78	4.25094	12.53	6.61	6.32	8.48667	3.50463
	A7	12.15	20.83	1.02	16.49	9.93022	17.88	17.38	6.49	13.9167	6.43654
	A10	25.4	28.24	18.81	26.82	4.83768	28.51	30.05	31.29	29.95	1.3927
	A30	9.18	15.05	11.92	12.115	2.93716	12.87	10.07	16.8	13.2467	3.38077
	A33	12.28	11.69	14.43	11.985	1.44212	27.73	12.44	17.11	19.0933	7.83557
	A41	15.17	19.56	0.95	17.365	9.72807	25.26	10.77	1.04	12.3567	12.1877
	A46	17.54	13.55	50.46	15.545	20.2567	14.93	12	45.76	24.23	18.703
	A59	16.67	8.94	23.91	12.805	7.48634	23.38	16.69	14.89	18.32	4.47356
	V17	9.6	10.52	12.55	10.06	1.5094	21.6	11.32	11.59	14.8367	5.85877
	V18	15.43	12.66	11.15	14.045	2.17069	16.72	9.04	17.19	14.3167	4.57577
	V21	15.06	16.71	16.36	15.885	0.869387	19.07	10.67	19	16.2467	4.82966
	V36	25.68	7.48	16.34	16.58	9.10105	10.67	14.64	19.79	15.0333	4.57271
	V54	24.57	44.17	28.07	34.37	10.4532	37.04	59.57	29.67	42.0933	15.5774
	V60	25.53	16.21	17.56	20.87	5.03663	11.03	12.1	14.3	12.4767	1.66722
	E1	15.79	9.07	12	12.43	3.36916	7.22	9.84	7.8	8.28667	1.37613
	G1	20.79	37.81	9.84	29.3	14.0943	19.46	8.73	18.56	15.5833	5.9522
	G5	20.84	32.22	30.61	26.53	6.15832	18.37	14.1	41.86	24.7767	14.9479
