# Supplementary material for: Closely related type II-C Cas9 orthologs recognize diverse PAMs
Source: eLife. 2022 Aug 12;11:e77825. doi: 10.7554/eLife.77825 (PMC9433092; doi:10.7554/eLife.77825)
Supplement: Figure 4—figure supplement 1—source data 1. [file elife-77825-fig4-figsupp1-data1.xlsx]

## Sheet: Sheet1
	Figure 4-figure supplement 1D.Genome editing with Nme2-SmuCas9for a panel of 12 loci with the N4C PAM.
		Nme2-SmuCas9
		Repeat 1	Repeat 2	Repeat 3	Average	Stdev
	TS1	1.06	1	0.93	0.996667	0.0650641
	TS2	0.25	0.23	0.18	0.22	0.0360555
	TS3	0.6	0.74	0.43	0.59	0.155242
	TS4	0.6	0.6	0.46	0.553333	0.080829
	TS5	14.5	13.45	26.04	17.9967	6.98549
	TS6	0.17	0.14	0.13	0.146667	0.0208167
	TS9	0.92	0.72	0.87	0.836667	0.104083
	TS10	0.46	0.4	0.36	0.406667	0.0503322
	TS12	0.32	0.29	0.2	0.27	0.06245
	TS13	13.93	12.2	11.87	12.6667	1.10645
	TS14	0.65	0.69	0.46	0.6	0.122882
	TS17	0.4	0.36	0.5	0.42	0.072111
