# Supplementary material for: Closely related type II-C Cas9 orthologs recognize diverse PAMs
Source: eLife. 2022 Aug 12;11:e77825. doi: 10.7554/eLife.77825 (PMC9433092; doi:10.7554/eLife.77825)
Supplement: Figure 4—source data 1. [file elife-77825-fig4-data1.xlsx]

## Sheet: Sheet1
	Figure 4D.Genome editing with Nsp2-SmuCas9 and NarCas9 for a panel of 12 loci with the N4C PAM.
	Figure 4E.Quantification of editing efficiency for Nsp2-SmuCas9 and NarCas9.
		Nsp2-SmuCas9					NarCas9
		Repeat 1	Repeat 2	Repeat 3	Average	Stdev	Repeat 1	Repeat 2	Repeat 3	Average	Stdev
	TS1	16.48	18.86	16.7	17.3467	1.31519	11.04	8.32	10.93	10.0967	1.53962
	TS2	12.93	12.44	11.85	12.4067	0.540771	1.7	1.96	1.79	1.81667	0.132035
	TS3	17.86	17.94	15.63	17.1433	1.3112	9.89	7.89	10.94	9.57333	1.54946
	TS4	5.68	7.14	6.53	6.45	0.73328	5.42	5.75	7.54	6.23667	1.14072
	TS5	17.78	19.91	17.83	18.5067	1.21558	13.9	13.17	13.22	13.43	0.407799
	TS6	6.51	6.16	5.71	6.12667	0.40104	1.21	1.25	1.33	1.26333	0.061101
	TS9	13.67	16.41	16.01	15.3633	1.48005	3.44	4.39	3.38	3.73667	0.566598
	TS10	5.56	5.48	4.44	5.16	0.62482	0.28	0.27	0.28	0.276667	0.0057735
	TS12	1.39	1.22	0.83	1.14667	0.287112	0.32	0.28	0.38	0.326667	0.0503322
	TS13	35.6	35.28	36.24	35.7067	0.488808	14.95	18.38	19.99	17.7733	2.57419
	TS14	17.97	16.47	13.68	16.04	2.17709	2.35	1.92	2.13	2.13333	0.215019
	TS17	21.98	27.67	23.16	24.27	3.00302	7.55	7.65	9.05	8.08333	0.83865
