# Supplementary material for: Closely related type II-C Cas9 orthologs recognize diverse PAMs
Source: eLife. 2022 Aug 12;11:e77825. doi: 10.7554/eLife.77825 (PMC9433092; doi:10.7554/eLife.77825)
Supplement: Figure 5—source data 2. [file elife-77825-fig5-data2.xlsx]

## Sheet: Sheet1
	Figure 5B. Nsp2Cas9, Nsp2-SmuCas9 and SpCas9 variants efficiencies vary based on the locus and target site.
	Figure 5C. Quantification of the indel efficiencies for Nsp2Cas9, Nsp2-SmuCas9 and SpCas9 variants.
		Nsp2Cas9					Nsp2-SmuCas9					SpCas9-WT					SpCas9-NG					SpCas9-RY
		Repeat 1	Repeat 2	Repeat 3	Average	Stdev	Repeat 1	Repeat 2	Repeat 3	Average	Stdev	Repeat 1	Repeat 2	Repeat 3	Average	Stdev	Repeat 1	Repeat 2	Repeat 3	Average	Stdev	Repeat 1	Repeat 2	Repeat 3	Average	Stdev
	A2	8.9	7.03	6.73	7.965	1.17585	1.29	1.11	1.03	1.14333	0.133167	7.48	8.01	7.31	7.6	0.365103	7.78	6.88	5.73	6.79667	1.02754	7.16	5.72	6.87	6.58333	0.761599
	E1	0.84	0.91	0.8	0.875	0.0556776	3.26	2.72	2.48	2.82	0.3995	12.33	13.48	12.16	12.6567	0.718076	6.69	8.68	7.61	7.66	0.995942	5.5	5.98	6.57	6.01667	0.535942
	A7	3.78	6.86	6.89	5.32	1.78696	1.85	1.51	1.63	1.66333	0.172434	0.4	0.48	0.38	0.42	0.052915	0.38	0.48	0.41	0.423333	0.051316	0.4	0.54	0.44	0.46	0.072111
	A10	13.7	15.26	14.78	14.48	0.798999	13.05	13.35	12.75	13.05	0.3	13.83	14.11	13.34	13.76	0.389744	13.27	14	13.55	13.6067	0.368284	14.3	13.83	13.51	13.88	0.397366
	A19	4.39	5.29	4.28	4.84	0.554106	3.96	5.1	4.23	4.43	0.595735	10.83	13.7	11.64	12.0567	1.47967	7.95	8.22	6.95	7.70667	0.669054	7.08	7.19	7.81	7.36	0.393573
	V1	7.24	6.79	6.5	7.015	0.372872	3.03	1.82	1.95	2.26667	0.664254	2.03	2.09	2.12	2.08	0.0458258	0.87	1.08	0.83	0.926667	0.134288	0.89	0.97	0.7	0.853333	0.138684
	V2	3.15	3.06	2.96	3.105	0.0950438	0.84	0.76	0.65	0.75	0.0953939	4.21	3.99	3.8	4	0.205183	2.89	3.16	3.08	3.04333	0.138684	1.58	1.42	1.37	1.45667	0.109697
	E4	6.42	5.01	5.65	5.715	0.705998	0.72	0.91	0.78	0.803333	0.0971253	8.74	8.97	8.99	8.9	0.138924	3.22	4.07	3.45	3.58	0.439659	4.39	4.78	2.92	4.03	0.980867
	G2	0.43	0.44	0.4	0.435	0.0208167	0.68	0.67	0.74	0.696667	0.0378594	8.37	8.63	7.59	8.19667	0.541233	0.86	1	1.02	0.96	0.087178	0.56	0.61	0.53	0.566667	0.0404145
	G4	11.26	10.09	8.68	10.675	1.29186	1.3	1.71	1.33	1.44667	0.228546	23.87	24.4	21.62	23.2967	1.47602	10.3	10.05	9.21	9.85333	0.570993	9.56	9.06	8.33	8.98333	0.618574
	G5	4.66	4.29	3.47	4.475	0.609016	1.27	1.26	0.29	0.94	0.562939	14.21	12.57	12.63	13.1367	0.930018	4.47	5.65	4.72	4.94667	0.621798	5.13	3.81	3.24	4.06	0.969484
