# Supplementary material for: Closely related type II-C Cas9 orthologs recognize diverse PAMs
Source: eLife. 2022 Aug 12;11:e77825. doi: 10.7554/eLife.77825 (PMC9433092; doi:10.7554/eLife.77825)
Supplement: Figure 6—source data 1. [file elife-77825-fig6-data1.xlsx]

## Sheet: Sheet1
	Figure 6A. Schematic of the GFP-reporter assay for specificity analysis is shown on the top. A panel of gRNAs with dinucleotide mutations is shown below. Each gRNA activity for Nsp2Cas9 and Nme2Cas9 is analyzed based on GFP expression.
			Nsp2Cas9						Nme2Cas9
		Repeat 1	Repeat 2	Repeat 3	Average	Stdev			Repeat 1	Repeat 2	Repeat 3	Average	Stdev
	ON	20.6	16.4	28.6	21.8667	6.19785		ON	12.4	19.1	18.4	16.6333	3.68284
	M1	11.8	12.6	20.5	14.9667	4.80867		M1	0.68	0.49	0.79	0.653333	0.151767
	M2	0.18	0.37	0.39	0.313333	0.115902		M2	0.031	0.047	0.024	0.034	0.0117898
	M3	0.21	0.31	0.19	0.236667	0.064291		M3	0.14	0.062	0.096	0.0993333	0.0391067
	M4	5.72	6.43	4.39	5.51333	1.03558		M4	0.083	0.024	0.076	0.061	0.0322335
	M5	0.12	0.075	0.058	0.0843333	0.0320364		M5	0.074	0.025	0.027	0.042	0.0277308
	M6	0.57	0.3	0.24	0.37	0.175784		M6	0.052	0.048	0.038	0.046	0.0072111
	M7	0.11	0.14	0.011	0.087	0.0675056		M7	0.042	0.012	0.039	0.031	0.0165227
	M8	2.14	1.85	1.29	1.76	0.432088		M8	0.042	0.012	0.024	0.026	0.0150997
	M9	2.62	2.27	2.18	2.35667	0.232451		M9	0.06	0.026	0.053	0.0463333	0.0179536
	M10	2.14	1.46	1.71	1.77	0.343948		M10	0.072	0.12	0.048	0.08	0.0366606
	M12	0.01	0.043	0.012	0.0216667	0.0185023		M12	0.041	0.012	0.022	0.025	0.0147309
	NC	0.063	0.03	0.045	0.046	0.0165227		NC	0.032	0.076	0.077	0.0616667	0.025697
