# Supplementary material for: Closely related type II-C Cas9 orthologs recognize diverse PAMs
Source: eLife. 2022 Aug 12;11:e77825. doi: 10.7554/eLife.77825 (PMC9433092; doi:10.7554/eLife.77825)
Supplement: Figure 7—source data 1. [file elife-77825-fig7-data1.xlsx]

## Sheet: Sheet1
	Figure 7A. Schematic of the GFP-reporter assay for specificity analysis is shown on the top. A panel of gRNAs with dinucleotide mutations is shown below. Each gRNA activity for Nsp2-SmuCas9 is analyzed based on GFP expression.
			Nsp2-SmuCas9
		Repeat 1	Repeat 2	Repeat 3	Average	Stdev
	ON	15.4	13.1	12.7	13.7333	1.45717
	M1	0.48	0.63	0.62	0.576667	0.083865
	M2	0.13	0.1	0.065	0.0983333	0.032532
	M3	0.47	0.72	0.58	0.59	0.1253
	M4	0.076	0.18	0.075	0.110333	0.0603352
	M5	0.11	0.11	0.11	0.11	0
	M6	0.21	0.11	0.12	0.146667	0.0550757
	M7	0.17	0.1	0.2	0.156667	0.051316
	M8	0.15	0.055	0.13	0.111667	0.0500833
	M9	0.19	0.2	0.12	0.17	0.043589
	M10	0.21	0.21	0.1	0.173333	0.0635085
	M12	0.21	0.24	0.15	0.2	0.0458258
	NC	0.034	0.2	0.087	0.107	0.084788
