# Supplementary material for: Closely related type II-C Cas9 orthologs recognize diverse PAMs
Source: eLife. 2022 Aug 12;11:e77825. doi: 10.7554/eLife.77825 (PMC9433092; doi:10.7554/eLife.77825)
Supplement: Supplementary file 1. — The file contains the Cas9 ID, tracrRNA, and amino acid sequences of Nme1Cas9 orthologs used in this study. The human codon-optimized Cas9 genes were synthesized. The primers used for the chimera’s construction were also listed in this file. [file elife-77825-supp1.xlsx]

## Sheet: Sheet1
Cas9 ID in Uniprot	Host strain	Nuclease name	CAS9_REPEAT&TRACR	CAS9_Amino Acid	Human codon-optimized Cas9_Gene
A0A011P7F8	Mannheimia granulomatis	MgrCas9	gttgtagctccctttctcatttcggaaacgaaatgagaaccgttgctacaataaggccgtctgaaaagatgtgccgcaacgctctgccccttaaagcttctgctttaaggggcatcgtttattttttt (Nme1Cas9_scaffold)	MQLSKLNYILGLDLGIASVGWSVIEIDETEMPIRLIDVGVRTFERAEVPKTGESLALARRLARSTRRLIRRRAFRLLKAKRLLKNHQIVSADELSTLPNHCWELRVKGLDERLTCQEWAAVLLHLLKHRGYLSQRKSEAQNADKEMGALLSGVANNHKLLSENHYRTPAEIAVKKFALEEGHMRNQRGAYTHTFNRLDLLAEMRLLFQTQRELGSPYASGELEQEFCKLLMWQKPALSGDAILKMLGKCTLEPTEYKAAKNTYTAERFVWLTKLNNLRILENGSERALNADERALLLNQPYEKAKFTYEQARKLLQLNEAARFNSVRYGKENAEKSTLMEMKAYHAIRKAVETADSSAWATLKTQPLLLDEIGTAFSIYKTDEDIKTQLQGKLADNVID…	ATGCAGCTGTCCAAGCTGAACTACATCCTGGGCCTGGACCTGGGAATCGCCAGCGTGGGATGGTCCGTTATCGAGATCGACGAGACCGAGATGCCTATCCGGCTTATCGACGTGGGCGTGAGAACCTTTGAGCGGGCCGAAGTGCCAAAGACAGGCGAGAGCCTGGCCCTGGCCAGACGGCTGGCCCGGAGCACAAGAAGGCTGATCCGACGGAGAGCCTTCAGACTGCTGAAAGCCAAAAGACTGCTCAAGAACCACCAGATCGTGAGCGCCGATGAACTGTCTACACTGCCTAATCACTGTTGGGAGCTGCGGGTGAAGGGACTGGATGAGCGGCTGACCTGTCAGGAGTGGGCCGCCGTGCTGCTGCACCTGCTGAAGCACCGGGGCTACCTGAGC…
A0A0A2YBT2	Gallibacterium anatis IPDH697-78	GanCas9	gttgtagctccctttctcatttcggaaacgaaatgagaaccgttgctacaataaggccgtctgaaaagatgtgccgcaacgctctgccccttaaagcttctgctttaaggggcatcgtttattttttt (NmeCas9_scaffold)	MEQLNYILGLDIGIASVGWAVVEIDHNEDPIRLIDVGVRTFNKAEVAKTGESLSLIRRLARGSRRLVRRKKMRLLTAKRLLKSEGILSDLDFNKGAILNLPNNCWELRVKGLDKKLSDKEWAAVLLHIIKHRGYLSQRKHDRKTDDKELGALLSGVSKNHSLLEEGEFRTAAELAINVFCNSKGHIRNQWGDYSHTFSRLDLQKEIKQLFVSQRELGNPYTSSSFEENIISLLMKQKEAISGNDILKMLGKCTYEKNEYKAAKNTYSAERFVWLTKLNNLRIVDDGVERALNSSERKLLIDEPYKKAKLTYAQVRKILELPDSAVFKGVRYFADNAESSTLMEMKFWHSIRKALESNNLKDEWLVLKTKPELLDEIGTGFSIYKTDDDITSYLSNKLDK…	ATGGAACAGCTGAACTACATCCTGGGCCTGGACATCGGCATCGCCAGCGTGGGCTGGGCCGTGGTGGAAATCGACCACAACGAAGATCCTATCAGACTGATCGACGTGGGCGTGAGAACATTTAACAAAGCAGAGGTCGCCAAGACCGGCGAGAGCCTGTCACTGATTAGGAGACTGGCCCGGGGCTCACGTAGGCTGGTCAGGCGGAAGAAGATGAGACTTCTCACCGCCAAGAGACTGCTCAAGTCCGAGGGCATCCTGTCTGATCTGGATTTCAACAAGGGAGCCATCCTGAACCTGCCAAACAACTGCTGGGAGCTGAGAGTCAAGGGACTGGATAAGAAGCTCAGCGATAAAGAGTGGGCTGCCGTGCTGCTTCATATCATCAAGCACCGGGGC…
A0A0J0YQ19	Neisseria arctica	NarCas9	gttgtagctccctttctcatttcggaaacgaaatgagaaccgttgctacaataaggccgtctgaaaagatgtgccgcaacgctctgccccttaaagcttctgctttaaggggcatcgtttattttttt (NmeCas9_scaffold)	MSHFRLKQLNYILGLDLGIASVGWAVVEIDTEENPTRLIDVGVRTFERAEVPKTGDSLAAARRQARSARRLIRRRTHRLLRARRLLKREGILHADDLNAEGLVKELPNTPWQLRVDGLDRKLMPKEWAAVLLHLVKHRGYLSQRKNESEGADKELGRLLAGVHENHQALQSSEYRTPAELAVKKFQAQSGHIRNQRGDYTHTFDRKDLQQELHQLFAAQQKYGNPFVSDGLKQGIETLLMQQRPALSGDAVQKMLGRCTFETEEFKAAKHTYSAERFIWLTKLNNLRIQENGNERCLTAQERGQIIDLPYKKAKLTYAQVRKELSLPENAFFKGLRYGKENAETAALMEMKAYHAIRKALEKAGLKTEWQGLACKPELLDAIGTVFSLYKTDEDISTRL…	ATGTCCCACTTCAGACTGAAACAGCTGAACTACATCCTCGGACTTGACCTGGGCATCGCCAGCGTGGGATGGGCTGTAGTGGAAATCGACACCGAAGAGAACCCCACCAGACTGATCGATGTGGGCGTTCGGACCTTCGAACGGGCCGAGGTTCCAAAAACCGGCGACTCTCTGGCTGCTGCGAGACGGCAGGCCAGAAGCGCCAGACGGCTGATCAGGCGGCGCACCCACAGGCTGCTGAGAGCCCGGCGCCTACTTAAGAGGGAAGGCATCTTGCATGCGGATGACCTGAACGCCGAGGGCCTGGTGAAGGAGCTGCCCAATACCCCTTGGCAGCTTCGGGTCGACGGACTCGATAGAAAGCTGATGCCTAAGGAATGGGCCGCCGTGCTGCTGCAT…
A0A1T0B6J6	[Haemophilus] felis	HfeCas9	gttgtagctccctttctcatttcggaaacgaaatgagaaccgttgctacaataaggccgtctgaaaagatgtgccgcaacgctctgccccttaaagcttctgctttaaggggcatcgtttattttttt (NmeCas9_scaffold)	MRVTQLNYILGLDLGIASVGWAVVEIDENEHPVRLIDVGVRTFERAEVPKTGASLALDRRLARSARRLTYRRKFRLLKAKRLLKKAGVLQETDFISSTTLAHMPNNPWELRLKALNQQLSPKEWAAVLLHLLKHRGYLSQRKNEQKTEDKELGALLSGVQTNHQLLQANDYRSPAELAINYFKEKDGHIRNQRGAYTHTFNRLDLRNELILLFEKQAELGNPYTSEELKCAFIELLMWQKPALSGDAILKMLGKCPFETDQYKAAKYSYSAEYFVWLTKLNNLRILENGAERSLTADERQLLLNQPFEKAKFTYAQARKLLELNEHAIFKQLRYVKDNPENTTLMEMKGYHAMRKALESVGLKTEWAELKTKPELFDTIATAFSIYKTDDEITAYLADK…	ATGAGAGTGACACAGCTGAACTACATCCTGGGCCTGGATCTGGGCATCGCCAGCGTTGGATGGGCCGTGGTGGAGATCGATGAGAACGAACATCCTGTCAGACTGATTGACGTGGGAGTTAGAACATTCGAGAGAGCCGAGGTGCCTAAGACAGGCGCCAGCCTGGCCCTGGACCGGCGACTGGCCAGATCCGCCAGACGGCTGACATACCGGAGAAAGTTCCGGCTGCTGAAGGCCAAGCGGCTGCTGAAAAAGGCCGGCGTGCTGCAGGAGACAGACTTCATCAGCAGCACCACCCTGGCCCACATGCCTAACAATCCCTGGGAACTGCGGCTGAAGGCCCTGAATCAGCAGCTGAGCCCCAAGGAATGGGCCGCCGTGCTGCTTCACCTGCTGAAG…
A0A1X3DFB7	Neisseria dentiae	NdeCas9	gttgtagctccctttctcatttcggaaacgaaatgagaaccgttgctacaataaggccgtctgaaaagatgtgccgcaacgctctgccccttaaagcttctgctttaaggggcatcgtttattttttt (NmeCas9_scaffold)	MKATTHRYILGLDLGIASVGWALVWVDENEYPIGLLDCGVRTFERAEVPKTGESLALARRTARSIRRLIRRRAHRLLRLRRLLKREGLLTAADFAADGLPVAMPVDTWQLRVQGLDRKLAEKEWAAVLLHLVKHRGYLSQRKSEMQTEDKELGRLLAGVAENHKLLADNPGQYRTPAELAVKLFAEKSGHLRNKGGNYSHTFNRLDLQKELHLLFAKQRELGNPFTSVELEAKVDNLLMTQRSALQGEAVLKMLGKCTFEPSEYKAAKNTYSAERFIWLTKLNNLRILHNGEERALNEHERKLLLDEPYKKAKLTYAQVRKILGLPESAVFKGLRYGKDSDGLKTESGALMEMKAYHKIRTVLEKAGLKGEWENRIRNPEVIDAIGTAFSLYKTDNDIQ…	ATGAAAGCCACCACCCACCGGTACATCCTCGGCCTGGACCTGGGCATCGCCAGCGTGGGCTGGGCTCTGGTTTGGGTGGATGAGAACGAGTATCCTATCGGCCTATTAGATTGCGGCGTGCGGACCTTTGAGAGAGCCGAAGTGCCTAAGACCGGCGAGAGCCTGGCTCTGGCTCGGAGGACAGCTAGAAGCATCAGACGGCTGATCCGGCGGCGGGCCCACAGACTGCTGAGACTGAGACGGCTGCTGAAGAGAGAGGGATTGCTCACAGCCGCCGACTTCGCCGCTGATGGCCTGCCCGTTGCTATGCCCGTGGACACATGGCAGCTGCGGGTGCAGGGACTGGACAGAAAGCTGGCCGAGAAGGAGTGGGCCGCCGTGCTGCTGCATCTGGTGAAG…
A0A263HCH5	Actinobacillus seminis	AseCas9	gttgtagctccctttctcatttcggaaacgaaatgagaaccgttgctacaataaggccgtctgaaaagatgtgccgcaacgctctgccccttaaagcttctgctttaaggggcatcgtttattttttt (NmeCas9_scaffold)	MQMKPLNYILGLDLGIASVGWAVVEIDQNENPLRLIDLGVRTFERAEVPKTGDSLALARRLARSGRRLVKRRAFRLLKAKRLLKQSGVLSAGDFISASTLKPLPNNPWELRVQGLTKRLNRTEWAAVLLHLLKHRGYLSQRKNESKTDNKEFGALLKGVSENRQLLQNHQYATPAEIAIKKFQQEEGHIRNKRGAYSHTFDRKDLLAELTALFQAQRTLGNIYTDKSLEQAFAELLMWQKPALAGEAILKMLGKCTFESTEYKAPKNSYSAEYFVWLTKLNNLRILENGSERALTVDERNQLINQPFEKAKLTYAQVRKLLELSDFAIFKGLRYGKENAENTTLMEMKAWHAIRKALESNGLKTEWDGLKTKPDLLDKIGVAFSIYKTDEDISQYLDGE…	ATGCAAATGAAGCCCCTGAATTACATCCTGGGCCTGGACTTGGGAATCGCTTCTGTGGGATGGGCCGTAGTGGAGATCGACCAGAATGAGAACCCTCTCAGACTAATCGACCTGGGCGTGAGAACCTTCGAGAGAGCCGAGGTCCCTAAAACCGGAGATAGCCTTGCCCTCGCTAGACGGCTGGCCAGAAGCGGCAGACGCCTGGTGAAGCGGCGGGCTTTCCGGCTGCTGAAAGCTAAAAGACTGCTGAAGCAGAGCGGCGTGCTGAGCGCTGGCGATTTCATCTCTGCCTCAACTCTGAAGCCCCTGCCAAACAATCCTTGGGAGCTGAGAGTGCAGGGCCTGACCAAAAGACTGAACCGGACAGAGTGGGCCGCCGTGCTCCTGCACCTGCTCAAG…
A0A2M8S290	Conservatibacter flavescens	CflCas9	gttgtagctccctttctcatttcggaaacgaaatgagaaccgttgctacaataaggccgtctgaaaagatgtgccgcaacgctctgccccttaaagcttctgctttaaggggcatcgtttattttttt (NmeCas9_scaffold)	MAITELKYILGLDLGIASVGWAVVEIDPQENPISLIDLGVRTFEKAEVPKTGESLNLSRRLARSQRRLIRRRAHRLLRMKRLLKREGVLQAVDCGKDFANLRLPNNVWSLRVAGLDRCLDNKEWAAVLLHLVKHRGYLSQRKNENKTDDKELGALLSGVNANHQLLLAKTYRSPAEIAEQKFASEKGHIRNKAGDYAHTFNRLDLQAEMRLLFEKQAKLGNPYTSASFQAQCIDLLMTQRAPLSGEAILNMLGHCTFEPTEYKAAKNTYSAERFIWLTKLNNLRILESGSERPLLDAERQQLLNQPYLKAKLTYTQVRKILDLSEQARFNIRYQRDKTLEESEKATLMEMKSYHAIRKALEGAGLKTEWQGLATKPDLLDRIGTAFSLYKTDNDISTYL…	ATGGCCATCACAGAGCTGAAGTACATCCTGGGCCTCGACCTGGGCATCGCTTCTGTGGGCTGGGCCGTGGTGGAAATCGATCCTCAGGAGAATCCTATCAGCCTGATAGACCTTGGAGTCAGAACTTTTGAGAAGGCTGAAGTGCCAAAGACCGGCGAGAGCCTGAATCTGTCACGGCGGCTGGCTAGAAGCCAGAGACGGCTGATCCGCAGACGGGCACATAGACTGCTGAGGATGAAGAGGCTCTTGAAGCGAGAGGGCGTGCTGCAGGCCGTGGACTGCGGAAAGGATTTCGCCAACCTGAGACTGCCTAACAACGTGTGGTCCCTGAGAGTGGCCGGACTGGACAGATGTCTCGATAACAAGGAATGGGCTGCTGTGCTGCTGCACCTGGTGAAG…
A0A2U0SK41	Pasteurella langaaensis DSM 22999	PlaCas9	gttgtagctccctttctcatttcggaaacgaaatgagaaccgttgctacaataaggccgtctgaaaagatgtgccgcaacgctctgccccttaaagcttctgctttaaggggcatcgtttattttttt (NmeCas9_scaffold)	MNMVKPLNYILGLDLGIASVGWAVVEIDEQENPLGLIDVGVRTFDRAEVPKTGESLALARRLARSARRLVQRRAARIKKAKRLLKAENLLLSTDEQLPNDVWQLRVNGLDQKLERQEWAAVLLHLLKHRGYLSQRKNESKSDNKELGALLLGVAANHNILMSSEYRTPAEIAVKKFQIEDGHIRNQRGAYTHTFNRLDLLAEMKLLFQRQMELGNPYTSATLLENLTDLLMWQKPALAGDAILKMLGKCTFEPTEDKAAKNSYSAERFVWLTKLNNLRILENGVERALTDQERFTLLEQPYEKAKLTYAQVRTILALSDDAIFKGVRYQGEDKKAVETKTTLMEMKAYHQIRKALEGADLKAEWNTIKNNPTLLDDIGTAFSLYKTDKDISCYLEGKLA…	ATGAACATGGTGAAGCCTCTGAACTACATCCTGGGACTGGATCTGGGCATCGCCAGCGTGGGCTGGGCCGTGGTGGAAATCGATGAGCAGGAAAACCCGCTGGGCCTGATCGACGTGGGCGTGCGGACCTTCGACAGGGCCGAGGTTCCTAAGACAGGCGAGAGCCTGGCCCTGGCTAGGCGGCTGGCCAGATCTGCCAGACGGCTGGTGCAGAGACGGGCCGCACGGATCAAGAAAGCCAAAAGACTGCTTAAGGCGGAGAACCTGCTGCTGTCTACAGACGAGCAGCTGCCAAACGACGTGTGGCAGCTCAGAGTGAACGGCCTGGACCAGAAGCTGGAAAGACAAGAGTGGGCTGCCGTGCTGCTTCATCTGCTGAAGCACCGGGGCTACCTGTCC…
A0A356E7S3	Pasteurellaceae bacterium	PstCas9	gttgtagctccctttctcatttcggaaacgaaatgagaaccgttgctacaataaggccgtctgaaaagatgtgccgcaacgctctgccccttaaagcttctgctttaaggggcatcgtttattttttt (NmeCas9_scaffold)	MDKYRYILGLDLGIASVGWAAVLVDKDEAPTGLLDCGVRTFERAEVPKTGDSLALARRQARSTRRLIRRRVHRLLRLRRLFKREGLLTTADFDAAGLVHGLPNDVWALRVKGLDHKLEAKEWAAVLLHLVKHRGYLSQRKSEAQSDNKELGRLLAGVHNNHIALQSPEYRTAAELAIKYLAPKTKTGHYRNKGGDYSHTFNRLDIQQELHLLFKQQRILGNPFVSAEFEAQIDDLLMVQRDALQGNAILKMLGVCTFEPSEYKAAKNTYSAERFVWLTKLNNLRIQHNGDERELNEDERALLLDEPYQKNKLSYKQVRTRLNLPEKATFKGLRYGGEEDGLSAEAKTILVEMKAYHQIRQVLDKAGLTTEWQSLKTQPEKLDAIGTAFSLYKTDTDIAE…	ATGGATAAGTACAGATACATCCTGGGACTGGATCTGGGCATCGCCAGCGTGGGATGGGCCGCCGTGCTCGTCGACAAGGATGAGGCTCCAACAGGACTGCTGGACTGCGGAGTGAGGACCTTCGAGCGAGCTGAAGTGCCCAAGACCGGTGATAGCCTGGCTCTTGCCAGACGGCAGGCTCGCAGCACCCGGCGGCTGATCAGACGGAGAGTGCACAGACTACTGAGACTGAGACGGCTGTTCAAGAGAGAAGGCCTGCTGACCACCGCGGATTTCGACGCCGCCGGCCTGGTGCACGGCCTGCCAAACGATGTGTGGGCCCTGAGAGTGAAGGGCCTGGACCACAAGCTCGAAGCCAAGGAATGGGCTGCTGTGCTGCTGCACCTGGTGAAGCACCGG…
A0A369Z1C7	Haemophilus parainfluenzae	Hpa1Cas9	gttgtagctccctttctcatttcggaaacgaaatgagaaccgttgctacaataaggccgtctgaaaagatgtgccgcaacgctctgccccttaaagcttctgctttaaggggcatcgtttattttttt (NmeCas9_scaffold)	MENKNLHYILGLDLGIASVGWAVVEIDEKENPLRLIDVGVRTFERAEVPKTGESLALSRRLARSARRLTQRRVARLKKAKRLLKSENILLSTDERLPHQVWQLRVEGLDRKLERQEWAAVLLHLIKHRGYLSQRKNESKSENKELGALLSGVASNHELLQQATYRTPAELAVKKFEVEEGHIRNQQGAYTHTFSRLDLLAEMELLFSRQQHFGNPFASEKLLENLTSLLMWQKPALSGEAILKMLGKCTFEDEYKAAKNTYSAERFVWITKLNNLRIQENGLERALNDNERLMLINQPYEKAKLNYAQVRSRLNLSDEAIFKGVRYSGEDKKAIETKTTLMEMKTYHQIRKVLEGNNLKAEWAELKANPTLLDEIGTAFSLYKTDEDISGYLAGKLSQP…	ATGGAAAACAAAAACCTGCACTACATCCTGGGCCTGGACCTGGGCATTGCCAGCGTGGGCTGGGCCGTGGTGGAAATCGACGAGAAGGAAAACCCTTTGAGACTGATCGACGTGGGAGTGCGGACCTTTGAGAGAGCCGAGGTGCCTAAGACAGGCGAAAGCTTAGCCCTGAGCCGGCGACTGGCTAGAAGCGCCCGGCGGTTGACCCAAAGACGGGTGGCTAGGCTGAAAAAGGCCAAGCGGCTCCTGAAGTCCGAAAACATCCTGCTGTCCACCGATGAGAGACTGCCCCACCAGGTGTGGCAGCTGCGGGTGGAAGGACTGGACAGAAAGCTGGAGAGACAAGAATGGGCCGCCGTGCTGCTGCATCTGATCAAGCACCGGGGGTATCTGTCACAG…
A0A369Z3K3	Haemophilus parainfluenzae	Hpa2Cas9	gttgtagctccctttctcatttcggaaacgaaatgagaaccgttgctacaataaggccgtctgaaaagatgtgccgcaacgctctgccccttaaagcttctgctttaaggggcatcgtttattttttt (NmeCas9_scaffold)	MENKNLHYILGLDLGIASVGWAVVEIDEKENPLRLIDVGVRTFERAEVPKTGESLALSRRLARSARRLTQRRVARLKKAKRLLKSENILLSTDERLPHQVWQLRVEGLDRKLERQEWAAVLLHLIKHRGYLSQRKNESKSENKELGALLSGVASNHELLQQATYRTPAELAVKKFEVEEGHIRNQQGAYTHTFSRLDLLAEMELLFSRQQHLGNPFTSEKLLENLTALLMWQKPALSGEAILKMLGKCTFEDEYKAAKNTYTAERFVWITKLNNLRIQENGLERALNDNERLMLIEQPYEKAKLTYAQVRSILNLSDDAIFKGVRYSGEDKKAIETKTTLMEMKAYHQIRKVLEGNNLKAEWAALKANPTLLDEIGTAFSLYKTDEDISAYLAGKLSQP…	ATGGAAAACAAGAACCTGCACTACATCCTGGGCCTGGACCTGGGCATCGCCAGCGTGGGCTGGGCCGTGGTGGAAATCGACGAGAAGGAAAACCCCCTGAGACTAATCGACGTCGGAGTCAGAACCTTCGAGAGAGCCGAGGTGCCAAAGACCGGCGAAAGCCTGGCTCTGAGCAGAAGGCTGGCCAGAAGCGCCCGGAGACTGACCCAGAGACGGGTGGCTAGACTGAAGAAGGCCAAGCGGCTGCTGAAGTCCGAAAATATTCTGCTGAGCACCGACGAGCGGCTGCCTCATCAGGTGTGGCAGCTGAGAGTGGAAGGCCTGGACAGAAAGCTGGAACGGCAAGAGTGGGCCGCCGTGCTGCTGCACCTGATCAAGCACAGAGGCTATCTGTCTCAG…
A0A377J007	Haemophilus pittmaniae	HpiCas9	gttgtagctccctttctcatttcggaaacgaaatgagaaccgttgctacaataaggccgtctgaaaagatgtgccgcaacgctctgccccttaaagcttctgctttaaggggcatcgtttattttttt (NmeCas9_scaffold)	MENKNLHYILGLDLGIASVGWAVVEIDKEENPLCLIDVGVRTFERAEVPKTGESLALSRRLARSARRLTQCRVARLKKAKRLLKLENILLSTDERLPHQVWQLRVEGLDRKLKRQEWAAVLLHLIKHRGYLSQRKNESKSENKELGALLSGVASNHELLQQTTYRTPAELAVKKFEVEEGHIRNQQGAYTHTFSRLDLLAEMELLFSRQQHFGNPFASEKLLENLTALLMWQKPALSGEAILKMLGKCTFEDEYKAAKNTYTAERFVWITKLNNLRIQENGLERALNDNERLILIEQPYEKAKLTYAQVRSILNLSDEAIFKGLRYSGEDKKAIETKTTLMEMKAYHQIRKVLEGNNLKAEWTELKENSTLLDEIGTAFSLYKTDEDISTYLAGKLSQP…	ATGGAGAACAAGAACCTGCACTACATCCTGGGACTGGATCTGGGCATCGCCAGCGTGGGCTGGGCTGTGGTGGAAATCGATAAGGAAGAAAATCCTCTGTGCCTGATCGACGTGGGCGTTCGAACCTTCGAGAGAGCCGAGGTGCCTAAAACAGGTGAGTCCCTGGCCCTGTCTCGGAGACTGGCTAGAAGCGCCCGTCGGCTGACCCAGTGCAGAGTCGCCAGACTGAAGAAAGCCAAACGTCTGCTGAAGCTGGAGAACATCCTGCTGAGCACAGATGAGAGACTGCCCCACCAGGTGTGGCAGCTGCGGGTGGAAGGCCTGGACAGAAAGCTTAAGAGACAGGAGTGGGCCGCTGTGCTGCTGCACCTGATCAAACACCGGGGCTACCTGAGCCAG…
A0A378UFN0	Bergeriella denitrificans (Neisseria denitrificans)	BdeCas9	gttgtagctccctttctcatttcggaaacgaaatgagaaccgttgctacaataaggccgtctgaaaagatgtgccgcaacgctctgccccttaaagcttctgctttaaggggcatcgtttattttttt (NmeCas9_scaffold)	MPRYILGLDLGIASVGWALVSVDEDEHPVGLIDCGVRTFERAEVPKTGDSLALARRQARSVRRLIRRRAHRLLRLRRLLKREGVLAAADFDADGLVRDLPVDVWQLRAAGLDRKLEAKEWAAVLLHLVKHRGYLSQRKSEINETDKHSEQGRLLAGVAANSELLKQDAYRTPAELAVKHFAVQNGHMRNKGGDYSHTFNRQDLQKELRLLFEKQRSFGNPFAAAELEGKVEDLLMTQRSALQGEAVLKMLGKCTFEPSEYKAAKNTYSAERFVWLTKLNNLRILHNGEERPLEEAERKMLLDEPYKKAKFTYAQARKLLDLPADAVFKGLRYGKDSDGLKAESGALMEMKAYHKIRSVLEKAGLKTEWQGLATQPEWLDAVGTAFSLYKTDEDITAHLA…	ATGCCTAGATACATCCTGGGCCTGGACCTGGGAATCGCCTCCGTGGGATGGGCTCTGGTCAGCGTGGACGAGGATGAGCACCCCGTCGGACTGATCGACTGCGGCGTAAGAACCTTCGAGAGAGCCGAGGTGCCTAAGACCGGCGATTCTCTGGCCCTGGCCAGAAGGCAGGCCAGAAGCGTGCGGAGACTGATCAGACGGAGAGCCCACAGACTGCTGCGGCTGAGACGGCTGCTGAAGAGAGAGGGAGTGCTGGCTGCAGCCGACTTCGACGCCGATGGGCTGGTCAGAGACCTGCCCGTGGACGTGTGGCAGCTGCGGGCCGCCGGCCTCGACAGAAAGCTGGAAGCTAAAGAGTGGGCTGCTGTGCTGCTGCATCTGGTGAAGCACAGAGGCTAC…
A0A379B6M0	[Pasteurella] mairii	PmaCas9	gttgtagctccctttctcatttcggaaacgaaatgagaaccgttgctacaataaggccgtctgaaaagatgtgccgcaacgctctgccccttaaagcttctgctttaaggggcatcgtttattttttt (NmeCas9_scaffold)	MKPLNYILGLDLGIASVGWAVVEIDQNENPLRLIDLGVRTFERAEVPKTGDSLALARRLARSGRRLVRRRAFRLLKAKRLLKQAGVLSAEDFISASTLKPLPNNPWELRVQGLTKQLSRTEWAAVLLHLLKHRGYLSQRKNESKTDNKELGALLKGVSENRQLLQNHQYATPAEIAIKKFQQEEGHIRNQRGAYSHTFDRKDLLVELTALFQAQRTLGNIYTDKSLEQAFAELLMWQKPALAGEAILKMLGKCTFEPTEYKAPKNSYSAEYFVWLTKLNNLRILENGGERALTVDERNQLINQAFEKAKLTYAQVRKLLELSDFAIFKGLRYGKENAENTTLMEMKAWHAIRKALERNGLKTEWDGLKTKPDLLDKIGVAFSIYKTDEEISQYLDGVLP…	ATGAAACCCCTGAACTACATCCTGGGCCTCGATCTGGGAATCGCCTCTGTAGGCTGGGCCGTGGTGGAAATCGACCAGAACGAGAACCCTCTGCGCCTGATCGACCTGGGCGTTAGAACCTTTGAGAGAGCTGAAGTCCCTAAGACAGGCGACAGCCTGGCTCTGGCCCGCAGACTGGCCAGAAGCGGCAGAAGGCTGGTCAGGCGGAGAGCGTTCCGGCTGCTGAAGGCCAAGAGACTGCTGAAACAGGCCGGCGTGCTGAGCGCCGAAGATTTCATCAGCGCCAGCACCTTGAAGCCGCTGCCCAACAACCCCTGGGAACTACGCGTGCAAGGACTGACCAAGCAGCTGTCCAGAACAGAATGGGCCGCTGTACTGCTCCATCTGCTCAAACACAGA…
A0A379CB86	Phocoenobacter uteri	PutCas9	gttgtagctccctttctcatttcggaaacgaaatgagaaccgttgctacaataaggccgtctgaaaagatgtgccgcaacgctctgccccttaaagcttctgctttaaggggcatcgtttattttttt (NmeCas9_scaffold)	MSTMSYILGLDLGVASVGWSVIEIDENEMPIRLVDLGVRTFEKAEVPKTGESLAKSRREARSIRRLIARRVRRLLLAKKALLEEGILTQNDFLTKSIIKDLPINAWELRAKGLDHKLTSKEWATVLLHLVKHRGYLSQRKNESDTADKQLGALLSGVKENHTLLQENKYRTPAELAICKFEKEEGHIRNQNGEYIHTFDRLDLQAELHLLFEKQRQFNNPYASAKLEEKMDYLLMYQKPALSGEAILKMLGKCSFETQEYKCAKNTYSAERFIWLTKLNNLRILTQGSERGLTESERALLLNQPYQKAKLTYTQVRNILELSESEIFKGLRYGNVEDKKMIEKETLMELKAFHQIRKVLEKANLKTEWQGLATKPELLDEIGTIFSLYKTDADITAQLQ…	ATGAGCACCATGAGCTACATCCTGGGCCTGGATCTCGGCGTGGCTAGCGTGGGATGGTCCGTGATCGAGATCGACGAGAACGAGATGCCCATCAGACTGGTGGACTTGGGCGTGCGGACATTCGAGAAAGCAGAGGTGCCTAAGACCGGCGAGTCCCTGGCCAAGAGCCGCAGGGAAGCCAGAAGCATCAGACGGCTGATCGCCCGGAGAGTGCGTAGACTGTTGCTGGCCAAAAAAGCCCTCCTGGAAGAAGGCATCCTGACCCAGAACGATTTCCTGACCAAGTCTATCATCAAAGACCTGCCTATCAACGCCTGGGAGCTGCGGGCCAAGGGCCTGGACCACAAGCTGACCAGCAAGGAGTGGGCCACAGTGCTGCTGCACCTGGTAAAGCACAGA…
A0A380MYP0	Suttonella indologenes	SinCas9	gttgtagctccctttctcatttcggaaacgaaatgagaaccgttgctacaataaggccgtctgaaaagatgtgccgcaacgctctgccccttaaagcttctgctttaaggggcatcgtttattttttt (NmeCas9_scaffold)	MAQQNYILGLDLGIASVGWACVWIDENEHTIGLLDCGVRTFERAEVPKTGDSLAKARREARSVRRLIRRRAHRLLRLRRLLKREGILKAADFGANRLPENLPIDAWALRVAGLDKKLAAKEWAAVLLHLVKHRGYLSQRKSELQEDGKSELGRLLAGVAQNHELLQADEYRTPAELAVKYFAVQSGHLRNKGGDYSHTFNRLDLQKELHLLFEKQREFGNPFASADLEAKVDALLMTQRSALQGEAVLKMLGKCRFESSEYKAAKNTYSAERFIWLTKLNNLRIMDGGEERALADDERRLLLDEPYQKSKLTYAQVRKILALPESAVFKGLRYGSDAESAKKAESGALMEMKAYHKIRTVLEKAGLKAAWNNRIRNPELLDRIGTAFSVYKTDEDIQTA…	ATGGCCCAACAAAATTACATCCTGGGCCTGGACTTGGGCATCGCCTCTGTGGGCTGGGCCTGTGTGTGGATCGACGAGAACGAGCACACCATAGGACTGCTGGATTGCGGGGTGCGGACCTTCGAGAGAGCCGAGGTGCCTAAGACCGGCGACAGCCTGGCTAAAGCCCGGAGAGAGGCCCGGAGCGTGCGGCGGCTCATCAGACGGAGAGCCCACAGACTGCTGAGACTCCGGCGGCTTCTGAAAAGAGAAGGAATCCTGAAGGCCGCTGACTTCGGCGCCAACAGACTGCCCGAGAATCTGCCTATCGATGCTTGGGCTCTGCGGGTGGCTGGCTTAGATAAGAAGCTGGCCGCTAAAGAGTGGGCCGCCGTGCTGCTGCACCTGGTGAAACACAGA…
A0A3N3EE71	Neisseria animalis	Nan1Cas9	gttgtagctccctttctcatttcggaaacgaaatgagaaccgttgctacaataaggccgtctgaaaagatgtgccgcaacgctctgccccttaaagcttctgctttaaggggcatcgtttattttttt (NmeCas9_scaffold)	MGAYPQKYILGLDLGIASVGWALVSVDENENPNGLLDCGVRTFERAEVPKTGDSLAKARREARSVRRLIRRRAHRLLRLRRLLKREGVLAAADFDSNGLVRDLPVDAWPLRVAGLDRKLEAKEWAAVLLHLVKHRGYLSQRKSEMQTEDKELGRLLAGVAENSKLLQQDAYRTPAELAVKHFAVQNGHMRNKGGDYSHTFNRQDLQRELHLLFEKQRGFGNPFAAAELENRVDTLLMTQRSALQGEAVLKMLGKCTFEPAEYKAAKHTYSAERFVWLTKLNNLRVLHNGEERALEEAERKMLLDEPYKKAKFTYTQARKLLDMPADAAFKGLRYGKDSDGLKAENGTLMEMKAYHKIRQVLEKAGLKTEWQGLACKPDLLDEIGTVFSLYKTDEDISSC…	ATGGGCGCCTACCCCCAGAAGTACATTCTGGGCCTCGACCTGGGGATCGCCAGCGTGGGCTGGGCCCTGGTGAGCGTGGATGAAAACGAGAACCCCAACGGCCTACTGGATTGCGGAGTGAGAACCTTCGAGAGGGCTGAAGTGCCTAAGACAGGCGACAGCCTGGCCAAGGCCCGGAGAGAGGCGAGATCTGTGCGGAGACTGATCAGACGGAGAGCTCACAGACTGCTGCGTCTGAGAAGGCTTCTTAAGCGAGAGGGCGTGCTGGCTGCCGCTGACTTCGACAGCAACGGCCTTGTGCGGGACCTACCTGTGGACGCCTGGCCTCTGAGAGTGGCCGGCCTCGATAGAAAGCTGGAGGCCAAGGAATGGGCTGCTGTGCTCCTGCATCTGGTGAAA…
A0A3S4XT82	Neisseria animaloris	Nan2Cas9	gttgtagctccctttctcatttcggaaacgaaatgagaaccgttgctacaataaggccgtctgaaaagatgtgccgcaacgctctgccccttaaagcttctgctttaaggggcatcgtttattttttt (NmeCas9_scaffold)	MKQQPQRYILGLDLGIASVGWALILVDEEGNPIGLLDCGVRTFERAEVPKTGDSLALARRQARSVRRLIRRRAHRLLRLRRLLKREGVLSATDFNSDGLPNLPIDTWQLRVAGLERKLTNQEWAAVLLHLVKHRGYLSQRKSETQTENKELGHLLAGVAKNSKLLSENANQYRTPAELAVKLFAEQSRHLRNKGGNYTHTFNRLDLQKELHLLFEQQRAFGNPFASAELQNKVDELLMMQRSALQGEAVLKMLGKCTFEPSEYKAAKHTYSAERFIWLTKLNNLRILENGTERALNEAERKLLLDEPYKKAKLTYAQARKLLDMSHDATFKGLRYGKDSDGLKAENGALMEMKAYHKIRTVLDKAGLKGEWENRIRNPEILDKIGTAFSLYKTDEDIQA…	ATGAAGCAGCAACCTCAGCGATACATCCTGGGACTGGATCTCGGCATCGCCAGCGTTGGCTGGGCCCTGATCCTGGTGGACGAAGAAGGAAATCCTATTGGCCTGCTTGACTGCGGCGTTAGAACATTTGAGCGGGCCGAGGTGCCTAAAACCGGCGACTCTCTGGCTCTAGCCCGGAGGCAGGCCCGCAGCGTGCGGAGACTGATCAGACGGAGAGCCCACAGACTTCTGAGACTGAGACGGCTGCTCAAAAGAGAGGGCGTGCTGTCCGCCACCGACTTCAACAGCGATGGCCTGCCTAATCTGCCTATCGACACATGGCAGCTGCGGGTGGCTGGCCTGGAAAGAAAACTGACCAACCAGGAGTGGGCTGCTGTGCTGCTGCACCTGGTGAAGCAC…
A0A420XER8	Otariodibacter oris	OorCas9	gttgtagctccctttctcatttcggaaacgaaatgagaaccgttgctacaataaggccgtctgaaaagatgtgccgcaacgctctgccccttaaagcttctgctttaaggggcatcgtttattttttt (NmeCas9_scaffold)	MNNSTLNYILGLDIGIASVGWAVVEIDGEENPIGLIDVGVRTFERAEVPKTGESLALARRLKRGTRRLIRRRAFRLLKAKRLLKQEGILTQDDFESSRVIKSLPHNTWELRVKGLTQLLSNKEWAAVLLHLLKHRGYLSQRKNETKTDNKELGALLSGVHSNHQLLAEKNYRTPAELALKHFYEEEGHIRNQRGAYTHTFGRLDLKQELRQLFNAQRELGNPHTSNELEQAFTELLMWQKPALSGEAILKMLGKCTLEKEEYKAAKNTYSAEYFVWLTKLNNLRILENGSERALSQEERAILIEQPYLKAKLTYTQVRKLLGLSDQAHFKGLSYRKDNAENTTLMEMKAWHAIRKALESNGLKTEWEGLKTQPDLLDKIGTAFSLYKTDEDITQYLNGC…	ATGAACAACAGCACCCTGAACTACATCCTGGGCTTAGACATCGGAATCGCCAGCGTGGGATGGGCCGTGGTTGAAATCGACGGCGAGGAAAATCCTATCGGCCTGATCGACGTGGGAGTTAGAACCTTCGAGAGAGCTGAAGTGCCTAAGACCGGAGAATCTCTTGCCCTGGCCAGAAGGCTGAAGAGAGGCACAAGACGGCTGATCAGACGGAGAGCCTTCCGGCTGTTAAAGGCAAAGAGACTGCTCAAACAGGAGGGCATCCTGACCCAGGACGACTTCGAGAGCAGCAGAGTGATCAAATCACTTCCACACAACACATGGGAGCTGAGAGTGAAGGGACTGACCCAGCTGCTGTCTAATAAAGAATGGGCCGCCGTGCTGCTGCATCTGCTCAAA…
A0A448K7T0	Pasteurella aerogenes	PaeCas9	gttgtagctccctttctcatttcggaaacgaaatgagaaccgttgctacaataaggccgtctgaaaagatgtgccgcaacgctctgccccttaaagcttctgctttaaggggcatcgtttattttttt (NmeCas9_scaffold)	MKPLNYILGLDLGIASVGWAVVEIDQNEFPIRLIDVGVRTFERAEVPKTGDSLALARRLARSSRRLVRRRAVRLLKAKRLLKQEGILQADDFHSSHLKPLPNNPWELRVKGLNHLLDRKEWAAVLLHLLKHRGYLSQRKNESKTDNKELGALLKGVSENRQLLQTQAFSTPAEIAIKKFQQEEGHIRNQRGAYSHTFDRNDLLAELRLLFQKQREFNNPYTSQSLEQAIAELLMWQKPALSGEAILKMLGKCTFEPTEYKAPKNSYSAEYFVWLTKLNNLRILENGSERGLTAEERQLLINQPFEKAKFTYAQARKLLGLSDLAIFKGVRYGKDNAESATLMEMKAWHAIRKALESNGLKTEWDGLKTKPELLDKIGTAFSIYKTDEEISQYLNSELSP…	ATGAAGCCTCTGAACTACATCCTGGGACTGGACCTTGGCATCGCCTCTGTGGGCTGGGCTGTGGTGGAAATCGATCAGAACGAATTCCCCATCCGGCTGATCGACGTGGGCGTGCGGACCTTCGAGCGCGCCGAAGTGCCCAAGACAGGAGATTCTCTGGCCCTGGCTAGACGGCTGGCTAGAAGCAGCAGAAGGCTGGTGCGGAGACGGGCCGTCAGACTGCTGAAAGCCAAAAGACTGCTGAAGCAGGAAGGAATCCTGCAGGCCGATGACTTCCACAGCAGCCACCTGAAACCTCTTCCCAATAATCCATGGGAACTGCGGGTCAAGGGCCTGAACCACCTGCTGGACAGAAAGGAGTGGGCCGCTGTTCTGCTGCACCTGCTGAAGCACAGAGGC…
A0A4S2QB06	Rodentibacter pneumotropicus	RpnCas9	gttgtagctccctttctcatttcggaaacgaaatgagaaccgttgctacaataaggccgtctgaaaagatgtgccgcaacgctctgccccttaaagcttctgctttaaggggcatcgtttattttttt (NmeCas9_scaffold)	MQNNPLNYILGLDLGIASIGWAVVEIDEESSPIRLIDVGVRTFERAEVAKTGESLALSRRLARSSRRLIKRRAERLKKAKRLLKAEKVLHSIDEKLPINVWQLRVKGLEEKLERQEWAAVLLHLLKHRGYLSQRKNESKSDNKELGALLSGIASNHQMLQSSEYRTPAEIAVKKFQVEEGHIRNQRGSYTHTFSRLDLLAEMELLFQRQAELGNSYTSTTLLENLTALLMWQKPALAGDAILKMLGKCTFEPTEYKAAKSSYSAERFVWLTKLNNLRILENGTERALNDNERFALLEQPYEKSKLTYAQVRAMLALGDNTIFKGVRYLDEDKKTVESKTTLMEMKFYHQIRKALESAELKKEWNELKGNTALLDEIGTAFSLYKTDDDICRYLEGKLSK…	ATGCAAAACAACCCCCTGAACTACATCCTGGGCCTGGACCTGGGCATCGCCAGCATCGGCTGGGCCGTGGTGGAAATTGATGAGGAAAGCAGCCCTATCAGACTGATCGACGTGGGCGTTAGAACCTTCGAGCGGGCCGAGGTGGCCAAGACCGGTGAGAGCCTGGCCTTGAGTAGACGGCTGGCCAGGTCCAGCCGGCGCCTCATCAAGCGGCGGGCCGAAAGACTGAAAAAGGCCAAACGGCTGCTGAAGGCCGAAAAAGTGCTCCATTCTATCGACGAGAAACTGCCTATCAACGTGTGGCAGCTGCGGGTGAAGGGCCTGGAAGAGAAGCTGGAAAGACAGGAGTGGGCTGCTGTGCTGCTGCATCTGCTGAAGCACCGGGGCTACCTGAGTCAG…
A0A4Y9GBC9	Neisseria sp. WF04	Nsp2Cas9	gttgtagctccctttctcatttcggaaacgaaatgagaaccgttgctacaataaggccgtctgaaaagatgtgccgcaacgctctgccccttaaagcttctgctttaaggggcatcgtttattttttt (NmeCas9_scaffold)	MKTPAHRYILGLDLGIASVGWALVLADENEYPIGLLDCGVRVFERAEMPKDGKSLAATRRQARSIRRLIRRRAHRLLRLRRLLKREGLLSAADFAADGLPAAMPVNTWQLRVEGLDRKLAEKEWAAVLLHLVKHRGYLSQRKNEMQTEDKELGKLLAGVAENRQLLADNPEQYRTPAELAVKRFAVQSGHLRNKGGDYAHTFNRLDLQKELHLLFAKQRGLGNPFASAELENKVDSLLMTQRAALQDGAVLKMLGHCTFEPQEYKAAKHTYSAERFIWLTRLNNLRILHNGEERALNEHERKLLLDEPYKKAKLTYKQVRKILNLPDSAVFKGLRYGKSEDGLKAESGALMEMKAYHKIRTVLEKAGLKGEWENRIRNPEVLDAIGTAFSLYKTDNDIQ…	ATGAAAACCCCTGCACACCGGTACATCCTGGGCCTGGATCTGGGAATCGCCAGCGTGGGCTGGGCCCTGGTACTGGCCGACGAGAATGAATATCCTATCGGCCTGCTGGATTGCGGCGTCAGGGTGTTCGAGCGCGCTGAGATGCCCAAGGACGGAAAAAGCCTTGCCGCCACACGTAGACAGGCCCGCTCGATCAGGCGGCTGATCCGTAGACGGGCCCATAGACTGCTTAGACTGAGACGGCTGCTGAAGCGAGAAGGCCTCCTGTCTGCTGCTGATTTCGCCGCTGATGGCCTGCCGGCTGCCATGCCTGTTAATACCTGGCAGCTGAGAGTGGAAGGCCTGGACCGTAAGCTGGCCGAAAAAGAGTGGGCCGCGGTGCTGCTGCATCTGGTCAAG…
A6VLA7	Actinobacillus succinogenes (strain ATCC 55618 / DSM 22257 / 130Z)	AsuCas9	gttgtagctccctttctcatttcggaaacgaaatgagaaccgttgctacaataaggccgtctgaaaagatgtgccgcaacgctctgccccttaaagcttctgctttaaggggcatcgtttattttttt (NmeCas9_scaffold)	MNLNYILGLDLGIASVGWAVVEIDEQENPQRLIDVGVRTFDRAEVLKTGESLALARRLARSSRRLVKRRAERIKKAKRLLKAENLLLSADEILPNEAWQLRVKGLDQKLERQEWAAVLLHLLKHRGYLSQRKNESKSENKELGALLSGVAINHQILQSAEYRTPAEIAVNKFQAEEGHIRNQRGAYTHTFSRLDLLAEMELLFQRQATLGNPHTSTKLLENLTALLMWQKPALAGEAILKMLGKCTFEPTEYKAAKNSYSAERFVWLTKLNNLRILEQGAERALTDNERFALLDQPYEKAKLTYAQVRTLLGLSDEAIFKGLRYQGEDKKAVETKTTLMEVKAYHQIRKALEGLDLKAEWNELKNNPALLDEIGTAFSLYKTDDDIHRYLDGKLSESVL…	ATGAACCTGAACTACATCCTGGGCCTGGACCTCGGCATCGCCAGCGTGGGCTGGGCCGTTGTCGAGATCGACGAACAGGAAAACCCCCAGAGACTGATCGATGTGGGAGTGCGAACCTTCGACCGGGCCGAGGTGCTGAAAACCGGTGAGAGCCTGGCCCTGGCACGCCGTCTGGCCAGAAGCAGCAGACGGCTGGTGAAAAGAAGGGCCGAACGCATCAAGAAGGCCAAAAGATTGCTGAAGGCCGAGAACCTGCTGCTGAGCGCCGATGAGATCCTGCCCAATGAAGCCTGGCAACTGAGAGTGAAGGGCCTGGACCAAAAGCTGGAACGGCAGGAGTGGGCCGCTGTGTTGCTGCACCTGCTGAAGCACAGAGGCTACCTGTCTCAGAGAAAGAAT…
C5S1N0	Actinobacillus minor NM305	AmiCas9	gttgtagctccctttctcatttcggaaacgaaatgagaaccgttgctacaataaggccgtctgaaaagatgtgccgcaacgctctgccccttaaagcttctgctttaaggggcatcgtttattttttt (NmeCas9_scaffold)	MKALNYILGLDLGIASVGWAVVEIDQNELPIRLIDLGVRTFERAEVPKTGDSLALARRLARSSRRLVRRRAVRLLKAKRLLKQEGILQADDFHSSHLKPLPNNPWELRVKGLNHLLDRKEWAAVLLHLLKHRGYLSQRKNESKTDNKELGALLKGVSENRQLLQAQAFSTPAEIAIKKFQQEEGHIRNQRGAYSHTFDRNDLLAELRLLFQKQREFNNPYTSQSLEQAIAELLMWQKPALSGEAILKMLGKCTFEPSEYKAPKNSYSAEYFVWLTKLNNLRILENGADRGLTAEERQLLINQPFEKAKFTYAQARKLLELSDLAIFKGVRYGKDNAESATLMEMKAWHAIRKALESNGLKTEWNGLKTKPELLDKIGTAFSIYKTDEDISQYLNGELSP…	ATGAAGGCCCTGAACTACATCCTGGGCCTGGACTTGGGGATCGCCAGCGTGGGCTGGGCCGTGGTGGAAATCGACCAGAATGAGCTGCCTATCAGACTCATCGATCTGGGCGTGCGGACTTTCGAGAGAGCCGAGGTGCCTAAGACAGGCGATTCTCTGGCCCTTGCTAGACGGCTGGCTCGGTCCAGCAGACGGCTGGTGAGACGGAGAGCCGTGAGACTGCTGAAGGCCAAAAGACTGTTGAAGCAGGAAGGAATCCTGCAGGCTGACGATTTCCATTCTAGCCATCTGAAGCCCCTGCCTAACAATCCTTGGGAATTAAGAGTGAAGGGCCTGAACCACCTGCTGGATAGAAAGGAATGGGCCGCCGTGCTGCTGCACCTGCTGAAGCACAGAGGC…
E0F2V7	Actinobacillus pleuropneumoniae serovar 10 str. D13039	ApsCas9	gttgtagctccctttctcatttcggaaacgaaatgagaaccgttgctacaataaggccgtctgaaaagatgtgccgcaacgctctgccccttaaagcttctgctttaaggggcatcgtttattttttt (NmeCas9_scaffold)	MKLTPLNYILGLDLGIASVGWAVVEIDEQENPLGLIDVGVRTFDRAEVAKTGESLALARRLARSSRRLVKRRADRIKKVKRLLKSENILLSADEQLPNDVWQLRVKGLDQKLERQEWAAVLLHLLKHRGYLSQRKNESKSENKELGALRSGVAANHQILQSAEYRTPAEIAVKKFHVEEGHIRNQRGAYTHTFSRLDLLAEIELLFTRQTELGNPHTSAKLLENLTALLMWQKPALAGEAILKMLGKCTFEPTEYKAAKNSYSAERFVWLTKLNNLRILEQGAERALTDNERFALLDQPYEKAKFTYAQARTMLALPDEAIFKGVRYQGEDKKAVETKTILMEMKAYHQIRKALENADLKAEWNELKNNSELLDDIGTAFSLHKTDEDICRYLDGKLSE…	ATGAAGCTGACCCCTCTGAACTACATCCTGGGACTCGACCTGGGCATCGCTAGCGTGGGCTGGGCCGTGGTGGAAATCGACGAGCAGGAGAACCCCCTGGGCCTGATCGACGTGGGAGTGCGGACCTTTGACCGGGCCGAGGTGGCCAAGACCGGCGAGAGCCTGGCCCTGGCAAGACGGCTGGCCAGAAGCTCTAGAAGGCTAGTGAAAAGACGGGCCGACAGAATCAAGAAGGTGAAAAGACTGCTGAAAAGCGAGAACATCCTGCTGTCCGCCGACGAGCAACTGCCTAATGACGTGTGGCAGCTGCGGGTGAAGGGCCTGGACCAGAAGCTTGAGCGGCAGGAGTGGGCCGCTGTGTTGCTGCACCTGCTGAAGCACCGGGGATACCTGAGCCAG…
F2B8K0	Neisseria bacilliformis ATCC BAA-1200	NbaCas9	gttgtagctccctttctcatttcggaaacgaaatgagaaccgttgctacaataaggccgtctgaaaagatgtgccgcaacgctctgccccttaaagcttctgctttaaggggcatcgtttattttttt (NmeCas9_scaffold)	MQQKPQRYILGLDLGIASVGWACVWADENEHPTGLLDCGVRTFERAEVPKTGDSLALARRQARSVRRLIRRRAHRLLRLRRLLKREGVLLSADFNENGLVRGLPIDAWALRVAGLDRKLSNKEWAAVLLHLVKHRGYLSQRKNETQSKDKELGRLLAGVNGNREALQNRSDEYRTAAELAVKKFAAENNGSLRNKGGDYSHTFDRKDLQRELHLLFERQRALDNPFTSSEMEAAVDELLMKQRSALQGEAVLKMLGRCTFEPSEYKAAKNTYSAERFVWLTKLNNLRIQYNGEERALSEAERRLLLDEPYQKAKLTYKQVRTILELPESAVFKGLRYGHGEDGLKAESGTLMEMKAYHAVRKALKDAGLEGEWENRIRNPELLDAIGTAFSLYKTDEDI…	ATGCAGCAGAAGCCTCAGCGGTACATCCTGGGCCTGGACTTGGGAATCGCCTCTGTGGGCTGGGCCTGCGTGTGGGCTGATGAGAATGAGCACCCCACCGGCCTCCTGGATTGCGGCGTGCGTACCTTTGAGAGAGCCGAGGTGCCTAAGACAGGCGATTCTCTGGCCCTGGCCAGACGGCAGGCCAGAAGCGTAAGACGCCTGATCCGGCGGCGGGCTCACAGACTGCTGAGGCTGCGGAGACTGCTGAAAAGAGAAGGCGTGCTCCTCTCTGCAGACTTCAACGAAAACGGCCTCGTGCGAGGTCTGCCCATCGATGCCTGGGCGCTGCGGGTGGCCGGCCTGGACAGAAAGCTGAGCAACAAGGAATGGGCCGCCGTGCTGCTGCACCTGGTCAAG…
J4KDT3	Haemophilus sputorum	HspCas9	gttgtagctccctttctcatttcggaaacgaaatgagaaccgttgctacaataaggccgtctgaaaagatgtgccgcaacgctctgccccttaaagcttctgctttaaggggcatcgtttattttttt (NmeCas9_scaffold)	MKNTSLNYVLGLDLGISSVGWAVVEIDEKENPLSLIDVGVRTFERAETQKGESLALARRLARSARRLTQRRVARLKKAKRLLKSENILLSTDECLPHQVWQLRVEGLERKLERQEWAAVLLHLIKHRGYLSQRKNESKSENKELGALLSGVANNHKLLQQTTYRTPAELAVKKFEVEEGHIRNQQGSYTHTFSRLDLLSEMELLFSRQQHFGNPFTSEKLLENLTALLMWQKPALSGDAILKMLGKCTFENEYKAAKHTYSAERFIWITKLNNLRIQENGLERALNDNERLALMKQPYEKAKLTYAQVRSILNLSDEAIFKGLRYSGEDKKTSETKTVLMEMKAYHQIRLALEKNDLKTEWAELKVNSSLLDEIGTAFSLYKTDEDISTCLAGKLSQPV…	ATGAAGAACACCAGCCTGAATTACGTGCTGGGCCTGGACCTGGGAATCAGCAGCGTGGGCTGGGCCGTGGTCGAAATCGATGAGAAAGAGAACCCCCTGTCTCTTATCGACGTGGGAGTCCGGACCTTTGAAAGAGCCGAGACTCAAAAAGGCGAGAGCCTGGCCCTGGCCAGACGGCTGGCCCGGAGCGCCAGGCGGCTGACCCAGAGAAGAGTGGCCAGACTGAAGAAAGCCAAACGGCTGCTGAAATCTGAGAACATCCTTCTGTCCACCGACGAGTGCCTGCCCCACCAAGTGTGGCAACTGCGGGTGGAGGGACTGGAGCGGAAGCTGGAAAGACAGGAGTGGGCAGCTGTGCTGCTGCACCTGATCAAGCACCGAGGATACCTGTCCCAGAGA…
V9H606	Simonsiella muelleri ATCC 29453	SmuCas9	gttgtagctccctttctcatttcggaaacgaaatgagaaccgttgctacaataaggccgtctgaaaagatgtgccgcaacgctctgccccttaaagcttctgctttaaggggcatcgtttattttttt (NmeCas9_scaffold)	MEKFHYVLGLDLGIASVGWAAIEIDKETETSIGLLDCGVRTFERAEVPKTGDSLAKARREARSTRRLIRRRSHRLLRLKRLLKREIFRQPETFKDLPINAWQLRVKGLDSRLNEYEWAAVLLHLVKHRGYLSQRKSEMSETDSKSEMGRLLAGVAENHQLLQQEQYRTPAELALKKFVKHFRNKGGDYAHTFNRLDLQAELHLLFQKQRELGNPFTSPELERQVDDLLMTQRSALQGDAILKMLGHCGFEPEQFKAAKNTFSAERFIWLTKLNNLRIQDQGKERALTADERTKLLDEPYKKSKLTYAQVRKLLSLPQTAIFKGLRYDLEHDKKAENSTLMEMKSYHNIRQTLEKSGLKTEWQSIATQPEILDAIGTAFSIYKTDEDISHELKTCRLPEN…	ATGGAAAAGTTCCACTACGTGCTGGGACTGGACCTCGGAATTGCCAGCGTGGGCTGGGCCGCTATCGAGATCGACAAGGAAACAGAAACCAGCATCGGGCTGCTGGATTGCGGAGTGCGGACCTTCGAAAGGGCCGAGGTGCCCAAGACCGGCGACAGCCTGGCTAAGGCCCGGCGGGAGGCCAGAAGCACAAGACGGCTGATCAGAAGAAGATCTCACAGACTGCTGCGGCTGAAGAGACTGCTGAAAAGAGAGATCTTCCGGCAGCCTGAGACATTCAAAGACCTGCCTATCAACGCCTGGCAGCTGAGAGTGAAAGGACTGGATAGCAGACTCAACGAGTACGAGTGGGCCGCCGTGCTGCTGCACCTGGTGAAGCACAGAGGCTACCTGTCTCAA…
W0Q6X6	Mannheimia sp. USDA-ARS-USMARC-1261	MspCas9	gttgtagctccctttctcatttcggaaacgaaatgagaaccgttgctacaataaggccgtctgaaaagatgtgccgcaacgctctgccccttaaagcttctgctttaaggggcatcgtttattttttt (NmeCas9_scaffold)	MKLLRYILGLDLGIASVGWAIVEIDENDFPIRLIDIGVRTFDKAEVSKTGESLALARRLARSTRRLIRRRAFRLLKGKRLLKQHNVINKEALTTLPTDCWALRVKGLDERLSPTEWSAVLLHLLKHRGYLSQRKNEAKSADKEMGALLSGVASNHQLLVENQFRTPAEIAVKKFALEEGHIRNQLGAYTHTFNRLDLLAEMKLLFQTQRELGNPHTSGQLEQEFCELLMWQKPALSGDAILKMLGKCTFETNEYKAAKHSYTAERFVWLTKLNNLRILEHGSERVLNTDERSLLLNQPYEKAKLTYTQVRKLLGLSEEARFNGVRYGKEKAEDATLIELKAYHAIRKAVEKADKSAWETLKNQTALLDEIGTTFSIYKTDDDITEQLNGKLSDTVLNAL…	ATGAAGCTGCTGAGATACATCCTGGGCCTCGACCTGGGCATCGCTAGCGTGGGCTGGGCCATCGTGGAGATCGACGAGAATGACTTCCCAATCAGACTGATCGACATCGGCGTGCGGACCTTTGACAAGGCCGAGGTGTCTAAGACCGGCGAGTCACTAGCCCTGGCCCGGAGACTCGCCAGATCTACCAGAAGGCTGATTCGACGGCGGGCCTTCAGACTGCTGAAGGGCAAACGCCTGCTGAAGCAGCACAACGTGATCAACAAAGAGGCCCTGACCACACTGCCCACGGACTGCTGGGCTCTGAGAGTGAAAGGCCTGGACGAAAGACTGTCCCCTACCGAGTGGAGCGCCGTGCTGCTGCATCTGCTGAAGCACAGAGGCTACCTGAGCCAGCGG…
		Nsp2-SmuCas9	gttgtagctccctttctcatttcggaaacgaaatgagaaccgttgctacaataaggccgtctgaaaagatgtgccgcaacgctctgccccttaaagcttctgctttaaggggcatcgtttattttttt (NmeCas9_scaffold)	MKTPAHRYILGLDLGIASVGWALVLADENEYPIGLLDCGVRVFERAEMPKDGKSLAATRRQARSIRRLIRRRAHRLLRLRRLLKREGLLSAADFAADGLPAAMPVNTWQLRVEGLDRKLAEKEWAAVLLHLVKHRGYLSQRKNEMQTEDKELGKLLAGVAENRQLLADNPEQYRTPAELAVKRFAVQSGHLRNKGGDYAHTFNRLDLQKELHLLFAKQRGLGNPFASAELENKVDSLLMTQRAALQDGAVLKMLGHCTFEPQEYKAAKHTYSAERFIWLTRLNNLRILHNGEERALNEHERKLLLDEPYKMKAKLTYKQVRKILNLPDSAVFKGLRYGKSEDGLKAESGALMEMKAYHKIRTVLEKAGLKGEWENRIRNPEVLDAIGTAFSLYKTDNDI…	ATGAAAACCCCTGCACACCGGTACATCCTGGGCCTGGATCTGGGAATCGCCAGCGTGGGCTGGGCCCTGGTACTGGCCGACGAGAATGAATATCCTATCGGCCTGCTGGATTGCGGCGTCAGGGTGTTCGAGCGCGCTGAGATGCCCAAGGACGGAAAAAGCCTTGCCGCCACACGTAGACAGGCCCGCTCGATCAGGCGGCTGATCCGTAGACGGGCCCATAGACTGCTTAGACTGAGACGGCTGCTGAAGCGAGAAGGCCTCCTGTCTGCTGCTGATTTCGCCGCTGATGGCCTGCCGGCTGCCATGCCTGTTAATACCTGGCAGCTGAGAGTGGAAGGCCTGGACCGTAAGCTGGCCGAAAAAGAGTGGGCCGCGGTGCTGCTGCATCTGGTCAAG…
		Nsp2-NarCas9	gttgtagctccctttctcatttcggaaacgaaatgagaaccgttgctacaataaggccgtctgaaaagatgtgccgcaacgctctgccccttaaagcttctgctttaaggggcatcgtttattttttt (NmeCas9_scaffold)	MKTPAHRYILGLDLGIASVGWALVLADENEYPIGLLDCGVRVFERAEMPKDGKSLAATRRQARSIRRLIRRRAHRLLRLRRLLKREGLLSAADFAADGLPAAMPVNTWQLRVEGLDRKLAEKEWAAVLLHLVKHRGYLSQRKNEMQTEDKELGKLLAGVAENRQLLADNPEQYRTPAELAVKRFAVQSGHLRNKGGDYAHTFNRLDLQKELHLLFAKQRGLGNPFASAELENKVDSLLMTQRAALQDGAVLKMLGHCTFEPQEYKAAKHTYSAERFIWLTRLNNLRILHNGEERALNEHERKLLLDEPYKKAKLTYKQVRKILNLPDSAVFKGLRYGKSEDGLKAESGALMEMKAYHKIRTVLEKAGLKGEWENRIRNPEVLDAIGTAFSLYKTDNDIQ…	ATGAAAACCCCTGCACACCGGTACATCCTGGGCCTGGATCTGGGAATCGCCAGCGTGGGCTGGGCCCTGGTACTGGCCGACGAGAATGAATATCCTATCGGCCTGCTGGATTGCGGCGTCAGGGTGTTCGAGCGCGCTGAGATGCCCAAGGACGGAAAAAGCCTTGCCGCCACACGTAGACAGGCCCGCTCGATCAGGCGGCTGATCCGTAGACGGGCCCATAGACTGCTTAGACTGAGACGGCTGCTGAAGCGAGAAGGCCTCCTGTCTGCTGCTGATTTCGCCGCTGATGGCCTGCCGGCTGCCATGCCTGTTAATACCTGGCAGCTGAGAGTGGAAGGCCTGGACCGTAAGCTGGCCGAAAAAGAGTGGGCCGCGGTGCTGCTGCATCTGGTCAAG…
		Nme2-SmuCas9	gttgtagctccctttctcatttcggaaacgaaatgagaaccgttgctacaataaggccgtctgaaaagatgtgccgcaacgctctgccccttaaagcttctgctttaaggggcatcgtttattttttt (NmeCas9_scaffold)	MAAFKPNPINYILGLDIGIASVGWAMVEIDEEENPIRLIDLGVRVFERAEVPKTGDSLAMARRLARSVRRLTRRRAHRLLRARRLLKREGVLQAADFDENGLIKSLPNTPWQLRAAALDRKLTPLEWSAVLLHLIKHRGYLSQRKNEGETADKELGALLKGVANNAHALQTGDFRTPAELALNKFEKESGHIRNQRGDYSHTFSRKDLQAELILLFEKQKEFGNPHVSGGLKEGIETLLMTQRPALSGDAVQKMLGHCTFEPAEPKAAKNTYTAERFIWLTKLNNLRILEQGSERPLTDTERATLMDEPYRKSKLTYAQARKLLGLEDTAFFKGLRYGKDNAEASTLMEMKAYHAISRALEKEGLKDKKSPLNLSSELQDEIGTAFSLFKTDEDITGRL…	atggccgccttcaagcctaacccaatcaattacatcctgggactggacatcggaatcgcatccgtgggatgggctatggtggagatcgacgaggaggagaatcctatccggctgatcgatctgggcgtgagagtgtttgagagggccgaggtgccaaagaccggcgattctctggctatggcccggagactggcacggagcgtgaggcgcctgacacggagaagggcacacaggctgctgagggcacgccggctgctgaagagagagggcgtgctgcaggcagcagacttcgatgagaatggcctgatcaagagcctgccaaacaccccctggcagctgagagcagccgccctggacaggaagctgacaccactggagtggtctgccgtgctgctgcac…
		Nme2-NarCas9	gttgtagctccctttctcatttcggaaacgaaatgagaaccgttgctacaataaggccgtctgaaaagatgtgccgcaacgctctgccccttaaagcttctgctttaaggggcatcgtttattttttt (NmeCas9_scaffold)	MAAFKPNPINYILGLDIGIASVGWAMVEIDEEENPIRLIDLGVRVFERAEVPKTGDSLAMARRLARSVRRLTRRRAHRLLRARRLLKREGVLQAADFDENGLIKSLPNTPWQLRAAALDRKLTPLEWSAVLLHLIKHRGYLSQRKNEGETADKELGALLKGVANNAHALQTGDFRTPAELALNKFEKESGHIRNQRGDYSHTFSRKDLQAELILLFEKQKEFGNPHVSGGLKEGIETLLMTQRPALSGDAVQKMLGHCTFEPAEPKAAKNTYTAERFIWLTKLNNLRILEQGSERPLTDTERATLMDEPYRKSKLTYAQARKLLGLEDTAFFKGLRYGKDNAEASTLMEMKAYHAISRALEKEGLKDKKSPLNLSSELQDEIGTAFSLFKTDEDITGRL…	ATGgccgccttcaagcctaacccaatcaattacatcctgggactggacatcggaatcgcatccgtgggatgggctatggtggagatcgacgaggaggagaatcctatccggctgatcgatctgggcgtgagagtgtttgagagggccgaggtgccaaagaccggcgattctctggctatggcccggagactggcacggagcgtgaggcgcctgacacggagaagggcacacaggctgctgagggcacgccggctgctgaagagagagggcgtgctgcaggcagcagacttcgatgagaatggcctgatcaagagcctgccaaacaccccctggcagctgagagcagccgccctggacaggaagctgacaccactggagtggtctgccgtgctgctgcac…
Nme2Cas9-F	aagcggcccgcagcaacc
Nme2Cas9-R	tttctttttcttggcttgacctgcc
Nsp2Cas9-F	aagcggcccgcagcaacca
Nsp2Cas9-931-R	GTCGCCGTTTGTATCTGTGAT
SmuCas9-PI-gibson-F	ATCACAGATACAAACGGCGACATGGTGCGGGTGGACGTGTAC
SmuCas9-PI-gibson-R	tggttgctgcgggccgcttTTTCTTGGACTTGATTTTGAGG
Nsp2Cas9-Gibson-F	CTAAGAAAAGACTGCCCGTGAGGaagcggcccgcagcaacca
Nsp2Cas9-Gibson-R	CTCGAACACGTCCACCCGCACCATGTCGCCGTTTGTATCTGT
NarCas9-PI-F	GTGCGGGTGGACGTGTTCGAG
NarCas9-PI-R	CCTCACGGGCAGTCTTTTCTTAG
Nme2Cas9-F	aagcggcccgcagcaacc
Nme2Cas9PI-R	atcgccattgtcggcgattg
Nme2-SmuCas9PI-gibson-F	caatcgccgacaatggcgatATGGTGCGGGTGGACGTGTAC
Nme2-SmuCas9PI-gibson-R	tggttgctgcgggccgcttTTTCTTGGACTTGATTTTGAGG
Nme2Cas9-Gibson-F	CTAAGAAAAGACTGCCCGTGAGGaagcggcccgcagcaacca
Nme2Cas9PI-R	atcgccattgtcggcgattg
Nme2-NarCas9PI-F2	caatcgccgacaatggcgatATGGTGCGGGTGGACGTGTT
Nme2-NarPI-R	CCTCACGGGCAGTCTTTTCTTAG
