# Supplementary material for: Closely related type II-C Cas9 orthologs recognize diverse PAMs
Source: eLife. 2022 Aug 12;11:e77825. doi: 10.7554/eLife.77825 (PMC9433092; doi:10.7554/eLife.77825)
Supplement: Supplementary file 2. — The single-guide RNA sequence for Nme1Cas9 orthologs and chimeras used in this study. [file elife-77825-supp2.xlsx]

## Sheet: Sheet1
Cas9 (Name)	single-guide RNA sequence
Nme1Cas9	Gttgtagctccctttctcatttcggaaacgaaatgagaaccgttgctacaataaggccgtctgaaaagatgtgccgcaacgctctgccccttaaagcttctgctttaaggggcatcgttta
MgrCas9	Gttgtagctccctttctcatttcggaaacgaaatgagaaacgttgctacaataaggaattcgaaagaattaccgtaatgctctgccccttgcagtttcggctgcaaggggcatcattt
GanCas9	Gttgtagttccctttctcatttcggaaacgaaatgagaaacgttactacaataaggcttctgaaaagattgtccgaaatgctctgtcccttataattagctaattattaagggacatcatttttt
NarCas9	Gttgtagctccctttctcatttcggaaacgaaatgagaaacgttgctacaataaggcttcttatactcgtataagatatgccgcaacgctctgccccttaaagtttaggctttaaggggcatcgttt
HfeCas9	Gttgtagctccctttctcatttcggaaacgaaatgagaaacgttgctacaataaggcttctgaaaagaatgaccgcaaagctctaccccttgaggttttacctcaaggggtatcttttt
NdeCas9	Gttgtagcttcctctctcatctcggaaacgagatgagagccgttgctacaataaggccgtctaaaagacgtgccgcgacgtaaaatacagaaatgtatgagcccctggccggatttccggtcaggggcatcgtctta
AseCas9	Gttgtagttccctttctcatttcggaaacgaaatgagaaacgttgctacaataaggcttttctgaaaagaattgaccgcaatgctctgccccttgtaatttcggttgccggggcatcat
CflCas9	Gttgtagctccctttctcatttcggaaacgaaatgagaaacgttgctacaataagattgttctgaaaagaatatatcgcaaagctctgccccttgatgttctacattaaggggcatctttt
PlaCas9	Gttgtagctccctttttcatttcggaaacgaaatgaaaaacgttgttacaataagagataaatttctcgcaacgctctgccccttgttgcttaggtttcaaggggcatcgtttt
Hpa1Cas9	Gttgtagctccctttttcatttcggaaacgaaatgaaaaacgttgttacaataagagaaaagatttctcgcaaagctctgtcccttgaaatgtaagtttcaagggatatctttt
Hpa2Cas9	Gttgtagctccctttttcatttcggaaacgaaatgaaaaacgttgttacaataagagaaaagatttctcgcaaagctctgtcccttgaaatgtaagtttcaagggacatctttt
HpiCas9	Gttgtagctccctttttcatttcggaaacgaaatgaaaaccgttgttacaataagagattagtttctcgcaaagttctgccccttaaaaccttcgttttaaggggcatctttt
BdeCas9	Gttgtagctccctctctcatctcggaaacgagatgagagccgttgctacaataaggccgtctgaaaagacgcgccgcgacgtaaaatactttatgtatgagcccctgtttgagttttcttaaacaggggcatcgtctttt
PmaCas9	Gttgtagctccctttctcatttcggaaacgaaatgagaaacgttgctacaataaggcttttctgaaaagaattgaccgcaatgctctgccccttgtaatttcggttacaaggggcatc
PutCas9	Gttgtagctccctttctcatttcggaaacgaaatgagaaaacgttgctacaataagagattcaatagaatttcgtaaagctctgctccttaatacttcggtgttaaggagcatcttttt
SinCas9	Gttgtagctccctctctcatctcggaaacgagatgagagccgttgctacaataagaccatttgaaaaaatgtgtcgcgacgtattcagaaatgaatgtgcccctgaaaagttctacttttcaggggcatcgtcttttt
Nan1Cas9	Gttgtagctccctctctcatctcggaaacgagatgagagccgttgctacaataaggccgtctgcaaagacgtgccgcgacgtaaaatactttatgtatgagcccctgtttgagtttcttaaacaggggcatcgtcttattttt
Nan2Cas9	Gttgtagcttcctctctcatctcggaaacgagatgagagccgttgctacaataaggccgtctgaaaagacgtgccgcgacgtaaagattcagaaatgagttgagcccctgtttaagtctgcttaaacaggggcatcgtcttttt
OorCas9	Gttgtagctcccgttctcatttcggaaacgaaatgagaaccgttgctacaataaggaattcgtaaagaattaccgtaatgctctgctccttaggacttcggttctaaggagcatcattt
PaeCas9	Tttgtagctccctttctcatttcggaaacgaaatgagaaacgttgctacaataaggcttttctgaaaagaattgaccgcaatgctctgccccttgtaatttcggttacaaggggcatcatttt
RpnCas9	Gttgtagctccctttttcatttcggaaacgaaatgaaaaacgttgttacaataagagatgaatttctcgcaaagctctgcctcttgaaatttcggtttcaagaggcatcttttt
AsuCas9	Gttgtagctccctttttcatttcggaaacgaaatgaaaaacgttgttacaataagagataaatttctcgcaacgctctgcctcctgggacttcctcagggggcatcgtttt
AmiCas9	Gttgtagctccctttctcatttcggaaacgaaatgagaaacgttgctacaataaggcttttctgaaaagaattgaccgcaatgctctgccccttgtaatttcggttacaaggggcatcattt
ApsCas9	Gttgtagctccctttttcatttcggaaacgaaatgaaaaacgttgttacaataagagatgaatttctcgcaacgctctgccccttgaaatttcggtttcaaggggcatcgttt
NbaCas9	Gttgtagcttcctctcttatctcggaaacgagataagagccgttgctacaataaggtcgtctgaaaagatggaccgcgacgtaaagtacatttatgtatgagcccctgtttggtgcaaaccaagcaggggcatcgtcttt
HspCas9	Gttgtagctccctttttcatttcggaaacgaaatgaaaaacgttgttacaataagagatgaatttctcgcaaagctctgccccttaaaatttcggttttaaggggcatctttt
MspCas9	Gttgtagctccctttctcatttcggaaacgaaatgagaaacgttgctacaataaggaattcgaaagaattaccgtaatgctctgccccttgatactttggtattaaggggcatcattgttatt
Nsp2Cas9	Gttgtagctccctttctcatttcggaaacgaaatgagaaacgttgctacaataaggaattcgaaagaattaccgtaatgctctgccccttgatactttggtattaaggggcatcattgttatt
SmuCas9	Gttgtagctccctttctcatttcggaaacgaaatgagaaacgttgctacaataaggaattcgaaagaattaccgtaatgctctgccccttgatactttggtattaaggggcatcattgttatt
Nsp2-SmuCas9	Gttgtagctccctttctcatttcggaaacgaaatgagaaacgttgctacaataaggaattcgaaagaattaccgtaatgctctgccccttgatactttggtattaaggggcatcattgttatt
Nme2-SmuCas9	Gttgtagctccctttctcatttcggaaacgaaatgagaaacgttgctacaataaggaattcgaaagaattaccgtaatgctctgccccttgatactttggtattaaggggcatcattgttatt
