# Supplementary material for: Closely related type II-C Cas9 orthologs recognize diverse PAMs
Source: eLife. 2022 Aug 12;11:e77825. doi: 10.7554/eLife.77825 (PMC9433092; doi:10.7554/eLife.77825)
Supplement: Supplementary file 3. — A list of oligonucleotide pairs and primers used for deep sequencing. [file elife-77825-supp3.xlsx]

## Sheet: Sheet1
Table S3. Primers used in this study
Name	Sequence	Description
Deep-F1	ACACTCTTTCCCTACACGACGCTCTTCCGATCTNNNN gcgagaaaagccttgttt	Primers to amplify the random PAM for deep sequencing
Deep-R1	ACTGGAGTTCAGACGTGTGCTCTTCCGATCTNNNN ctgaacttgtggccgtttac	Primers to amplify the random PAM for deep sequencing
P5-index1-F	AATGATACGGCGACCACCGAGATCTACAC TGAACCTT ACACTCTTTCCCTACACGAC	Primers to amplify the random PAM for deep sequencing
P5-index2-F	AATGATACGGCGACCACCGAGATCTACAC TGCTAAGT ACACTCTTTCCCTACACGAC	Primers to amplify the random PAM for deep sequencing
P5-index3-F	AATGATACGGCGACCACCGAGATCTACAC TAAGACAC ACACTCTTTCCCTACACGAC	Primers to amplify the random PAM for deep sequencing
P5-index4-F	AATGATACGGCGACCACCGAGATCTACAC TGTTCTCT ACACTCTTTCCCTACACGAC	Primers to amplify the random PAM for deep sequencing
P5-index5-F	AATGATACGGCGACCACCGAGATCTACAC CTAATCGA ACACTCTTTCCCTACACGAC	Primers to amplify the random PAM for deep sequencing
P5-index6-F	AATGATACGGCGACCACCGAGATCTACAC CTAGAACA ACACTCTTTCCCTACACGAC	Primers to amplify the random PAM for deep sequencing
P5-index7-F	AATGATACGGCGACCACCGAGATCTACAC TAAGTTCC ACACTCTTTCCCTACACGAC	Primers to amplify the random PAM for deep sequencing
P5-index8-F	AATGATACGGCGACCACCGAGATCTACAC TAGACCTA ACACTCTTTCCCTACACGAC	Primers to amplify the random PAM for deep sequencing
P5-index37-F	AATGATACGGCGACCACCGAGATCTACAC TATAGCCT ACACTCTTTCCCTACACGAC	Primers to amplify the random PAM for deep sequencing
P5-index38-F	AATGATACGGCGACCACCGAGATCTACAC ATAGAGGC ACACTCTTTCCCTACACGAC	Primers to amplify the random PAM for deep sequencing
P5-index39-F	AATGATACGGCGACCACCGAGATCTACAC CCTATCCT ACACTCTTTCCCTACACGAC	Primers to amplify the random PAM for deep sequencing
P5-index40-F	AATGATACGGCGACCACCGAGATCTACAC GGCTCTGA ACACTCTTTCCCTACACGAC	Primers to amplify the random PAM for deep sequencing
P5-index41-F	AATGATACGGCGACCACCGAGATCTACAC AGGCGAAG ACACTCTTTCCCTACACGAC	Primers to amplify the random PAM for deep sequencing
P5-index42-F	AATGATACGGCGACCACCGAGATCTACAC TAATCTTA ACACTCTTTCCCTACACGAC	Primers to amplify the random PAM for deep sequencing
P5-index43-F	AATGATACGGCGACCACCGAGATCTACAC CAGGACGT ACACTCTTTCCCTACACGAC	Primers to amplify the random PAM for deep sequencing
P5-index44-F	AATGATACGGCGACCACCGAGATCTACAC GTACTGAC ACACTCTTTCCCTACACGAC	Primers to amplify the random PAM for deep sequencing
P7-adapter25-R	CAAGCAGAAGACGGCATACGAGAT CGAGTAAT GTGACTGGAGTTCAGACGTGTG	Primers to amplify the random PAM for deep sequencing
P7-adapter26-R	CAAGCAGAAGACGGCATACGAGAT TCTCCGGA GTGACTGGAGTTCAGACGTGTG	Primers to amplify the random PAM for deep sequencing
P7-adapter27-R	CAAGCAGAAGACGGCATACGAGAT AATGAGCG GTGACTGGAGTTCAGACGTGTG	Primers to amplify the random PAM for deep sequencing
P7-adapter28-R	CAAGCAGAAGACGGCATACGAGAT GGAATCTC GTGACTGGAGTTCAGACGTGTG	Primers to amplify the random PAM for deep sequencing
P7-adapter29-R	CAAGCAGAAGACGGCATACGAGAT TTCTGAAT GTGACTGGAGTTCAGACGTGTG	Primers to amplify the random PAM for deep sequencing
P7-adapter30-R	CAAGCAGAAGACGGCATACGAGAT ACGAATTC GTGACTGGAGTTCAGACGTGTG	Primers to amplify the random PAM for deep sequencing
P7-adapter31-R	CAAGCAGAAGACGGCATACGAGAT AGCTTCAG GTGACTGGAGTTCAGACGTGTG	Primers to amplify the random PAM for deep sequencing
P7-adapter32-R	CAAGCAGAAGACGGCATACGAGAT GCGCATTA GTGACTGGAGTTCAGACGTGTG	Primers to amplify the random PAM for deep sequencing
P7-adapter33-R	CAAGCAGAAGACGGCATACGAGAT CATAGCCG GTGACTGGAGTTCAGACGTGTG	Primers to amplify the random PAM for deep sequencing
P7-adapter34-R	CAAGCAGAAGACGGCATACGAGAT TTCGCGGA GTGACTGGAGTTCAGACGTGTG	Primers to amplify the random PAM for deep sequencing
P7-adapter35-R	CAAGCAGAAGACGGCATACGAGAT GCGCGAGA GTGACTGGAGTTCAGACGTGTG	Primers to amplify the random PAM for deep sequencing
P7-adapter36-R	CAAGCAGAAGACGGCATACGAGAT CTATCGCT GTGACTGGAGTTCAGACGTGTG	Primers to amplify the random PAM for deep sequencing
Nme2-AAVS1-sg2-F	ACC Gtcagcatagggtggcaaagccc	Oligonucleotide pairs for construction of gRNA expression plasmid on U6-Nme2_scaffold vector
Nme2-AAVS1-sg2-R	AAC gggctttgccaccctatgctgaC	Oligonucleotide pairs for construction of gRNA expression plasmid on U6-Nme2_scaffold vector
Nme2-AAVS1-sg3-F	ACC gcagcgcaaagtgacaatggcc	Oligonucleotide pairs for construction of gRNA expression plasmid on U6-Nme2_scaffold vector
Nme2-AAVS1-sg3-R	AAC ggccattgtcactttgcgctgc	Oligonucleotide pairs for construction of gRNA expression plasmid on U6-Nme2_scaffold vector
Nme2-AAVS1-sg4-F	ACC Gctctgacctgcattctctcccc	Oligonucleotide pairs for construction of gRNA expression plasmid on U6-Nme2_scaffold vector
Nme2-AAVS1-sg4-R	AAC ggggagagaatgcaggtcagagC	Oligonucleotide pairs for construction of gRNA expression plasmid on U6-Nme2_scaffold vector
Nme2-AAVS1-sg7-F	ACC Gtctgtcccctccaccccacagt	Oligonucleotide pairs for construction of gRNA expression plasmid on U6-Nme2_scaffold vector
Nme2-AAVS1-sg7-R	AAC actgtggggtggaggggacagaC	Oligonucleotide pairs for construction of gRNA expression plasmid on U6-Nme2_scaffold vector
Nme2-AAVS1-sg10-F	ACC gggtctgagggtggagggactg	Oligonucleotide pairs for construction of gRNA expression plasmid on U6-Nme2_scaffold vector
Nme2-AAVS1-sg10-R	AAC cagtccctccaccctcagaccc	Oligonucleotide pairs for construction of gRNA expression plasmid on U6-Nme2_scaffold vector
Nme2-AAVS1-sg30-F	ACC Gagggaggagagatgcccggaga	Oligonucleotide pairs for construction of gRNA expression plasmid on U6-Nme2_scaffold vector
Nme2-AAVS1-sg30-R	AAC tctccgggcatctctcctccctC	Oligonucleotide pairs for construction of gRNA expression plasmid on U6-Nme2_scaffold vector
Nme2-AAVS1-sg33-F	ACC Gtgagaatggtgcgtcctaggtg	Oligonucleotide pairs for construction of gRNA expression plasmid on U6-Nme2_scaffold vector
Nme2-AAVS1-sg33-R	AAC cacctaggacgcaccattctcaC	Oligonucleotide pairs for construction of gRNA expression plasmid on U6-Nme2_scaffold vector
Nme2-AAVS1-sg41-F	ACC Gaggactgcatgggtcagcacag	Oligonucleotide pairs for construction of gRNA expression plasmid on U6-Nme2_scaffold vector
Nme2-AAVS1-sg41-R	AAC ctgtgctgacccatgcagtcctC	Oligonucleotide pairs for construction of gRNA expression plasmid on U6-Nme2_scaffold vector
Nme2-AAVS1-sg46-F	ACC Gaagcctgagcgcctctcctggg	Oligonucleotide pairs for construction of gRNA expression plasmid on U6-Nme2_scaffold vector
Nme2-AAVS1-sg46-R	AAC cccaggagaggcgctcaggcttC	Oligonucleotide pairs for construction of gRNA expression plasmid on U6-Nme2_scaffold vector
Nme2-AAVS1-sg59-F	ACC gctgggacttggccagacactg	Oligonucleotide pairs for construction of gRNA expression plasmid on U6-Nme2_scaffold vector
Nme2-AAVS1-sg59-R	AAC cagtgtctggccaagtcccagc	Oligonucleotide pairs for construction of gRNA expression plasmid on U6-Nme2_scaffold vector
Nme2-VEGFA-sg17-F	ACC Gccgggaccctccactcctcctg	Oligonucleotide pairs for construction of gRNA expression plasmid on U6-Nme2_scaffold vector
Nme2-VEGFA-sg17-R	AAC caggaggagtggagggtcccggC	Oligonucleotide pairs for construction of gRNA expression plasmid on U6-Nme2_scaffold vector
Nme2-VEGFA-sg18-F	ACC Gaggggggtgccgaggaccgaag	Oligonucleotide pairs for construction of gRNA expression plasmid on U6-Nme2_scaffold vector
Nme2-VEGFA-sg18-R	AAC cttcggtcctcggcacccccctC	Oligonucleotide pairs for construction of gRNA expression plasmid on U6-Nme2_scaffold vector
Nme2-VEGFA-sg21-F	ACC Gtctcgaggtagccccagcccgg	Oligonucleotide pairs for construction of gRNA expression plasmid on U6-Nme2_scaffold vector
Nme2-VEGFA-sg21-R	AAC ccgggctggggctacctcgagaC	Oligonucleotide pairs for construction of gRNA expression plasmid on U6-Nme2_scaffold vector
Nme2-VEGFA-sg36-F	ACC Gaggaaacgacctgggaccacct	Oligonucleotide pairs for construction of gRNA expression plasmid on U6-Nme2_scaffold vector
Nme2-VEGFA-sg36-R	AAC aggtggtcccaggtcgtttcctC	Oligonucleotide pairs for construction of gRNA expression plasmid on U6-Nme2_scaffold vector
Nme2-VEGFA-sg54-F	ACC Gctgtcccctcctgagcccatgg	Oligonucleotide pairs for construction of gRNA expression plasmid on U6-Nme2_scaffold vector
Nme2-VEGFA-sg54-R	AAC ccatgggctcaggaggggacagC	Oligonucleotide pairs for construction of gRNA expression plasmid on U6-Nme2_scaffold vector
Nme2-VEGFA-sg60-F	ACC Gaagggtgagtctcaggccacag	Oligonucleotide pairs for construction of gRNA expression plasmid on U6-Nme2_scaffold vector
Nme2-VEGFA-sg60-R	AAC ctgtggcctgagactcacccttC	Oligonucleotide pairs for construction of gRNA expression plasmid on U6-Nme2_scaffold vector
Nme2-EMX1-sg1-F	ACC Gaatgtggtgcttgagaagtgga	Oligonucleotide pairs for construction of gRNA expression plasmid on U6-Nme2_scaffold vector
Nme2-EMX1-sg1-R	AAC tccacttctcaagcaccacattC	Oligonucleotide pairs for construction of gRNA expression plasmid on U6-Nme2_scaffold vector
Nme2-GRIN2-sg1-F	ACC Gcccatcaagctgggctccaagg	Oligonucleotide pairs for construction of gRNA expression plasmid on U6-Nme2_scaffold vector
Nme2-GRIN2-sg1-R	AAC ccttggagcccagcttgatgggC	Oligonucleotide pairs for construction of gRNA expression plasmid on U6-Nme2_scaffold vector
Nme2-GRIN2-sg5-F	ACC Gtttacaatgagagacaatactg	Oligonucleotide pairs for construction of gRNA expression plasmid on U6-Nme2_scaffold vector
Nme2-GRIN2-sg5-R	AAC cagtattgtctctcattgtaaaC	Oligonucleotide pairs for construction of gRNA expression plasmid on U6-Nme2_scaffold vector
mRNF2-sg4-F	ACC Gcacagtgtcagctggatgtggt	Oligonucleotide pairs for construction of gRNA expression plasmid on U6-Nme2_scaffold vector
mRNF2-sg4-R	AAC accacatccagctgacactgtgC	Oligonucleotide pairs for construction of gRNA expression plasmid on U6-Nme2_scaffold vector
mRNF2-sg5-F	ACC Gaggccagcttggaactacatag	Oligonucleotide pairs for construction of gRNA expression plasmid on U6-Nme2_scaffold vector
mRNF2-sg5-R	AAC ctatgtagttccaagctggcctC	Oligonucleotide pairs for construction of gRNA expression plasmid on U6-Nme2_scaffold vector
mRNF2-sg6-F	ACC Gaagaagccaaggatgcaagtcg	Oligonucleotide pairs for construction of gRNA expression plasmid on U6-Nme2_scaffold vector
mRNF2-sg6-R	AAC cgacttgcatccttggcttcttC	Oligonucleotide pairs for construction of gRNA expression plasmid on U6-Nme2_scaffold vector
mRosa26-sg1-F	ACC Gatggactcaacttgcacgaaca	Oligonucleotide pairs for construction of gRNA expression plasmid on U6-Nme2_scaffold vector
mRosa26-sg1-R	AAC tgttcgtgcaagttgagtccatC	Oligonucleotide pairs for construction of gRNA expression plasmid on U6-Nme2_scaffold vector
mRosa26-sg3-F	ACC gtcttctgggcaggcttaaagg	Oligonucleotide pairs for construction of gRNA expression plasmid on U6-Nme2_scaffold vector
mRosa26-sg3-R	AAC cctttaagcctgcccagaagac	Oligonucleotide pairs for construction of gRNA expression plasmid on U6-Nme2_scaffold vector
mRosa26-sg5-F	ACC gaatatcttctggataaacatg	Oligonucleotide pairs for construction of gRNA expression plasmid on U6-Nme2_scaffold vector
mRosa26-sg5-R	AAC catgtttatccagaagatattc	Oligonucleotide pairs for construction of gRNA expression plasmid on U6-Nme2_scaffold vector
mTh-sg1-F	ACC gtggtcttgggagagagcccca	Oligonucleotide pairs for construction of gRNA expression plasmid on U6-Nme2_scaffold vector
mTh-sg1-R	AAC tggggctctctcccaagaccac	Oligonucleotide pairs for construction of gRNA expression plasmid on U6-Nme2_scaffold vector
mTh-sg2-F	ACC gagtaggacttaggaagccaca	Oligonucleotide pairs for construction of gRNA expression plasmid on U6-Nme2_scaffold vector
mTh-sg2-R	AAC tgtggcttcctaagtcctactc	Oligonucleotide pairs for construction of gRNA expression plasmid on U6-Nme2_scaffold vector
TS1-F	ACC Gcagcatagggtggcaaagccca	Oligonucleotide pairs for construction of gRNA expression plasmid on U6-Nme2_scaffold vector
TS1-R	AAC tgggctttgccaccctatgctgC	Oligonucleotide pairs for construction of gRNA expression plasmid on U6-Nme2_scaffold vector
TS2-F	ACC Gcagcgcaaagtgacaatggcca	Oligonucleotide pairs for construction of gRNA expression plasmid on U6-Nme2_scaffold vector
TS2-R	AAC tggccattgtcactttgcgctgC	Oligonucleotide pairs for construction of gRNA expression plasmid on U6-Nme2_scaffold vector
TS3-F	ACC Gtctgacctgcattctctcccct	Oligonucleotide pairs for construction of gRNA expression plasmid on U6-Nme2_scaffold vector
TS3-R	AAC aggggagagaatgcaggtcagaC	Oligonucleotide pairs for construction of gRNA expression plasmid on U6-Nme2_scaffold vector
TS4-F	ACC Gctgtcccctccaccccacagtg	Oligonucleotide pairs for construction of gRNA expression plasmid on U6-Nme2_scaffold vector
TS4-R	AAC cactgtggggtggaggggacagC	Oligonucleotide pairs for construction of gRNA expression plasmid on U6-Nme2_scaffold vector
TS5-F	ACC ggtctgagggtggagggactgg	Oligonucleotide pairs for construction of gRNA expression plasmid on U6-Nme2_scaffold vector
TS5-R	AAC ccagtccctccaccctcagacc	Oligonucleotide pairs for construction of gRNA expression plasmid on U6-Nme2_scaffold vector
TS6-F	ACC Gtgaactggagtgtgacagcctg	Oligonucleotide pairs for construction of gRNA expression plasmid on U6-Nme2_scaffold vector
TS6-R	AAC caggctgtcacactccagttcaC	Oligonucleotide pairs for construction of gRNA expression plasmid on U6-Nme2_scaffold vector
TS9-F	ACC Gtaagacgaattgtagaaaggag	Oligonucleotide pairs for construction of gRNA expression plasmid on U6-Nme2_scaffold vector
TS9-R	AAC ctcctttctacaattcgtcttaC	Oligonucleotide pairs for construction of gRNA expression plasmid on U6-Nme2_scaffold vector
TS10-F	ACC Gactgactggatgtgcacagcag	Oligonucleotide pairs for construction of gRNA expression plasmid on U6-Nme2_scaffold vector
TS10-R	AAC ctgctgtgcacatccagtcagtC	Oligonucleotide pairs for construction of gRNA expression plasmid on U6-Nme2_scaffold vector
TS12-F	ACC Gctatgttccaggcactgctcca	Oligonucleotide pairs for construction of gRNA expression plasmid on U6-Nme2_scaffold vector
TS12-R	AAC tggagcagtgcctggaacatagC	Oligonucleotide pairs for construction of gRNA expression plasmid on U6-Nme2_scaffold vector
TS13-F	ACC ggtggtagagggagcagtatga	Oligonucleotide pairs for construction of gRNA expression plasmid on U6-Nme2_scaffold vector
TS13-R	AAC tcatactgctccctctaccacc	Oligonucleotide pairs for construction of gRNA expression plasmid on U6-Nme2_scaffold vector
TS14-F	ACC Gccaagacggtgaccagactcaa	Oligonucleotide pairs for construction of gRNA expression plasmid on U6-Nme2_scaffold vector
TS14-R	AAC ttgagtctggtcaccgtcttggC	Oligonucleotide pairs for construction of gRNA expression plasmid on U6-Nme2_scaffold vector
TS16-F	ACC gtggcaggcgcctgtaatccca	Oligonucleotide pairs for construction of gRNA expression plasmid on U6-Nme2_scaffold vector
TS16-R	AAC tgggattacaggcgcctgccac	Oligonucleotide pairs for construction of gRNA expression plasmid on U6-Nme2_scaffold vector
TS17-F	ACC Gtgcagttagggaataagcccca	Oligonucleotide pairs for construction of gRNA expression plasmid on U6-Nme2_scaffold vector
TS17-R	AAC tggggcttattccctaactgcaC	Oligonucleotide pairs for construction of gRNA expression plasmid on U6-Nme2_scaffold vector
Nsp2-VEGFA-sg1-F	ACC ggcagagccaggaatgtgactt	Oligonucleotide pairs for construction of gRNA expression plasmid on U6-Nme2_scaffold vector
Nsp2-VEGFA-sg1-R	AAC aagtcacattcctggctctgcc	Oligonucleotide pairs for construction of gRNA expression plasmid on U6-Nme2_scaffold vector
Nsp2-VEGFA-sg2-F	ACC Gatgaaggagaggcagaggctga	Oligonucleotide pairs for construction of gRNA expression plasmid on U6-Nme2_scaffold vector
Nsp2-VEGFA-sg2-R	AAC tcagcctctgcctctccttcatC	Oligonucleotide pairs for construction of gRNA expression plasmid on U6-Nme2_scaffold vector
Nsp2-EMX1-sg4-F	ACC gcagaggaaacgacaagagaat	Oligonucleotide pairs for construction of gRNA expression plasmid on U6-Nme2_scaffold vector
Nsp2-EMX1-sg4-R	AAC attctcttgtcgtttcctctgc	Oligonucleotide pairs for construction of gRNA expression plasmid on U6-Nme2_scaffold vector
Nsp2-GRIN2-sg2-F	ACC gaggggcagggcagcggcgccc	Oligonucleotide pairs for construction of gRNA expression plasmid on U6-Nme2_scaffold vector
Nsp2-GRIN2-sg2-R	AAC gggcgccgctgccctgcccctc	Oligonucleotide pairs for construction of gRNA expression plasmid on U6-Nme2_scaffold vector
Nsp2-GRIN2-sg4-F	ACC Gttgctgtctaaagggttgacaa	Oligonucleotide pairs for construction of gRNA expression plasmid on U6-Nme2_scaffold vector
Nsp2-GRIN2-sg4-R	AAC ttgtcaaccctttagacagcaaC	Oligonucleotide pairs for construction of gRNA expression plasmid on U6-Nme2_scaffold vector
Nsp2-GRIN2-sg7-F	ACC gaggagggcattgatggggcac	Oligonucleotide pairs for construction of gRNA expression plasmid on U6-Nme2_scaffold vector
Nsp2-GRIN2-sg7-R	AAC gtgccccatcaatgccctcctc	Oligonucleotide pairs for construction of gRNA expression plasmid on U6-Nme2_scaffold vector
Nme2-AAVS1-sg19-F	ACC Gatcgccaggtgaggcaaggg	Oligonucleotide pairs for construction of gRNA expression plasmid on U6-Nme2_scaffold vector
Nme2-AAVS1-sg19-R	AAC cccttgcctcacctggcgatC	Oligonucleotide pairs for construction of gRNA expression plasmid on U6-Nme2_scaffold vector
Sp-AAVS1-sg2-F	ACC Gagcatagggtggcaaagccc	Oligonucleotide pairs for construction of gRNA expression plasmid on U6-SpCas9_scaffold vector
Sp-AAVS1-sg2-R	AAC gggctttgccaccctatgctC	Oligonucleotide pairs for construction of gRNA expression plasmid on U6-SpCas9_scaffold vector
Sp-EMX1-sg1-F	ACC Gtgtggtgcttgagaagtgga	Oligonucleotide pairs for construction of gRNA expression plasmid on U6-SpCas9_scaffold vector
Sp-EMX1-sg1-R	AAC tccacttctcaagcaccacaC	Oligonucleotide pairs for construction of gRNA expression plasmid on U6-SpCas9_scaffold vector
Sp-AAVS1-sg7-F	ACC Gtgtcccctccaccccacagt	Oligonucleotide pairs for construction of gRNA expression plasmid on U6-SpCas9_scaffold vector
Sp-AAVS1-sg7-R	AAC actgtggggtggaggggacaC	Oligonucleotide pairs for construction of gRNA expression plasmid on U6-SpCas9_scaffold vector
Sp-AAVS1-sg10-F	ACC gtctgagggtggagggactg	Oligonucleotide pairs for construction of gRNA expression plasmid on U6-SpCas9_scaffold vector
Sp-AAVS1-sg10-R	AAC cagtccctccaccctcagac	Oligonucleotide pairs for construction of gRNA expression plasmid on U6-SpCas9_scaffold vector
Sp-AAVS1-sg19-F	ACC Gatcgccaggtgaggcaaggg	Oligonucleotide pairs for construction of gRNA expression plasmid on U6-SpCas9_scaffold vector
Sp-AAVS1-sg19-R	AAC cccttgcctcacctggcgatC	Oligonucleotide pairs for construction of gRNA expression plasmid on U6-SpCas9_scaffold vector
Sp-VEGFA-sg1-F	ACCG Gcagagccaggaatgtgactt	Oligonucleotide pairs for construction of gRNA expression plasmid on U6-SpCas9_scaffold vector
Sp-VEGFA-sg1-R	AAAC aagtcacattcctggctctgC	Oligonucleotide pairs for construction of gRNA expression plasmid on U6-SpCas9_scaffold vector
Sp-VEGFA-sg2-F	ACCG gaaggagaggcagaggctga	Oligonucleotide pairs for construction of gRNA expression plasmid on U6-SpCas9_scaffold vector
Sp-VEGFA-sg2-R	AAAC tcagcctctgcctctccttc	Oligonucleotide pairs for construction of gRNA expression plasmid on U6-SpCas9_scaffold vector
Sp-EMX1-sg4-F	ACCG Gagaggaaacgacaagagaat	Oligonucleotide pairs for construction of gRNA expression plasmid on U6-SpCas9_scaffold vector
Sp-EMX1-sg4-R	AAAC attctcttgtcgtttcctctC	Oligonucleotide pairs for construction of gRNA expression plasmid on U6-SpCas9_scaffold vector
Sp-GRIN2-sg2-F	ACCG ggggcagggcagcggcgccc	Oligonucleotide pairs for construction of gRNA expression plasmid on U6-SpCas9_scaffold vector
Sp-GRIN2-sg2-R	AAAC gggcgccgctgccctgcccc	Oligonucleotide pairs for construction of gRNA expression plasmid on U6-SpCas9_scaffold vector
Sp-GRIN2-sg4-F	ACCG gctgtctaaagggttgacaa	Oligonucleotide pairs for construction of gRNA expression plasmid on U6-SpCas9_scaffold vector
Sp-GRIN2-sg4-R	AAAC ttgtcaaccctttagacagc	Oligonucleotide pairs for construction of gRNA expression plasmid on U6-SpCas9_scaffold vector
Sp-GRIN2-sg7-F	ACCG ggagggcattgatggggcac	Oligonucleotide pairs for construction of gRNA expression plasmid on U6-SpCas9_scaffold vector
Sp-GRIN2-sg7-R	AAAC gtgccccatcaatgccctcc	Oligonucleotide pairs for construction of gRNA expression plasmid on U6-SpCas9_scaffold vector
AAVS1-deep3-F	ACACTCTTTCCCTACACGACGCTCTTCCGATCTNNNNgcttagccactctgtgctga	Primers to amplify the Endogenous target site for deep sequencing of step I
AAVS1-deep3-R	ACTGGAGTTCAGACGTGTGCTCTTCCGATCTNNNNGGAGACAAAGTCCAGGACCG	Primers to amplify the Endogenous target site for deep sequencing of step I
AAVS1-deep4-F	ACACTCTTTCCCTACACGACGCTCTTCCGATCTNNNNCCTAGGTGTTCACCAGGTCG	Primers to amplify the Endogenous target site for deep sequencing of step I
AAVS1-deep4-R	ACTGGAGTTCAGACGTGTGCTCTTCCGATCTNNNNGTCTGAAGAGCAGAGCCAGG	Primers to amplify the Endogenous target site for deep sequencing of step I
AAVS1-deep5-F	ACACTCTTTCCCTACACGACGCTCTTCCGATCTNNNNTCCGTGCGTCAGTTTTACCT	Primers to amplify the Endogenous target site for deep sequencing of step I
AAVS1-deep5-R	ACTGGAGTTCAGACGTGTGCTCTTCCGATCTNNNNGCCAAGGACTCAAACCCAGA	Primers to amplify the Endogenous target site for deep sequencing of step I
AAVS1-deep7-F	ACACTCTTTCCCTACACGACGCTCTTCCGATCTNNNNCTTGCTCTCTGCTGTGTTGC	Primers to amplify the Endogenous target site for deep sequencing of step I
AAVS1-deep7-R	ACTGGAGTTCAGACGTGTGCTCTTCCGATCTNNNNGGAGACATCCGTCGGAGAAG	Primers to amplify the Endogenous target site for deep sequencing of step I
AAVS1-deep13-F	ACACTCTTTCCCTACACGACGCTCTTCCGATCTNNNNACCAACGCCGACGGTATC	Primers to amplify the Endogenous target site for deep sequencing of step I
AAVS1-deep13-R	ACTGGAGTTCAGACGTGTGCTCTTCCGATCTNNNNTGGTCAGCACAGAGTGGCTA	Primers to amplify the Endogenous target site for deep sequencing of step I
AAVS1-deep14-F	ACACTCTTTCCCTACACGACGCTCTTCCGATCTNNNNTCGACTTCCCCTCTTCCGAT	Primers to amplify the Endogenous target site for deep sequencing of step I
AAVS1-deep14-R	ACTGGAGTTCAGACGTGTGCTCTTCCGATCTNNNNgagagagacggcagcgttag	Primers to amplify the Endogenous target site for deep sequencing of step I
AAVS1-deep15-F	ACACTCTTTCCCTACACGACGCTCTTCCGATCTNNNNCCGGAACTCTGCCCTCTAAC	Primers to amplify the Endogenous target site for deep sequencing of step I
AAVS1-deep15-R	ACTGGAGTTCAGACGTGTGCTCTTCCGATCTNNNNGTGGAGGAAGACGGAACCTG	Primers to amplify the Endogenous target site for deep sequencing of step I
AAVS1-deep16-F	ACACTCTTTCCCTACACGACGCTCTTCCGATCTNNNNGGTCCGAGAGCTCAGCTAGT	Primers to amplify the Endogenous target site for deep sequencing of step I
AAVS1-deep16-R	ACTGGAGTTCAGACGTGTGCTCTTCCGATCTNNNNAGGTGGGGGTTAGACCCAAT	Primers to amplify the Endogenous target site for deep sequencing of step I
AAVS1-deep17-F	ACACTCTTTCCCTACACGACGCTCTTCCGATCTNNNNggctcctgggtttgagagag	Primers to amplify the Endogenous target site for deep sequencing of step I
AAVS1-deep17-R	ACTGGAGTTCAGACGTGTGCTCTTCCGATCTNNNNcagcctctccccattcagac	Primers to amplify the Endogenous target site for deep sequencing of step I
AAVS1-deep23-F	ACACTCTTTCCCTACACGACGCTCTTCCGATCTNNNNaagatgcctctaaccgctcc	Primers to amplify the Endogenous target site for deep sequencing of step I
AAVS1-deep23-R	ACTGGAGTTCAGACGTGTGCTCTTCCGATCTNNNNgcacatcactaggcccaac	Primers to amplify the Endogenous target site for deep sequencing of step I
VEGFA-deep2-F	ACACTCTTTCCCTACACGACGCTCTTCCGATCTNNNNGCCACAGTGTGACCTTCAGA	Primers to amplify the Endogenous target site for deep sequencing of step I
VEGFA-deep2-R	ACTGGAGTTCAGACGTGTGCTCTTCCGATCTNNNNACAGTTACCAGGCTTCCAGC	Primers to amplify the Endogenous target site for deep sequencing of step I
VEGFA-deep3-F	ACACTCTTTCCCTACACGACGCTCTTCCGATCTNNNNgaggaaaatgtggttctcccc	Primers to amplify the Endogenous target site for deep sequencing of step I
VEGFA-deep3-R	ACTGGAGTTCAGACGTGTGCTCTTCCGATCTNNNNgcaggaaggaaggactaggg	Primers to amplify the Endogenous target site for deep sequencing of step I
VEGFA-deep4-F	ACACTCTTTCCCTACACGACGCTCTTCCGATCTNNNNCCCACTGAGGAGTCCAACAT	Primers to amplify the Endogenous target site for deep sequencing of step I
VEGFA-deep4-R	ACTGGAGTTCAGACGTGTGCTCTTCCGATCTNNNNAAGGAGATGGTTGGGGCTTG	Primers to amplify the Endogenous target site for deep sequencing of step I
VEGFA-deep7-F	ACACTCTTTCCCTACACGACGCTCTTCCGATCTNNNNTTAGCCCACCTTGGTGGAAG	Primers to amplify the Endogenous target site for deep sequencing of step I
VEGFA-deep7-R	ACTGGAGTTCAGACGTGTGCTCTTCCGATCTNNNNAAAAGACAGAGAGAGCGGCG	Primers to amplify the Endogenous target site for deep sequencing of step I
VEGFA-deep9-F	ACACTCTTTCCCTACACGACGCTCTTCCGATCTNNNNGTGTTCCCGGAGCCTCG	Primers to amplify the Endogenous target site for deep sequencing of step I
VEGFA-deep9-R	ACTGGAGTTCAGACGTGTGCTCTTCCGATCTNNNNAAATAAGCGGGGTGACAGGG	Primers to amplify the Endogenous target site for deep sequencing of step I
VEGFA-deep20-F	ACACTCTTTCCCTACACGACGCTCTTCCGATCTNNNNgagttgcacaggggaggtat	Primers to amplify the Endogenous target site for deep sequencing of step I
VEGFA-deep20-R	ACTGGAGTTCAGACGTGTGCTCTTCCGATCTNNNNaaactctccatggaccaggc	Primers to amplify the Endogenous target site for deep sequencing of step I
EMX1-deep1-F	ACACTCTTTCCCTACACGACGCTCTTCCGATCTNNNNgttttagcactaagcctgttt	Primers to amplify the Endogenous target site for deep sequencing of step I
EMX1-deep1-R	ACTGGAGTTCAGACGTGTGCTCTTCCGATCTNNNNcctcatggagttattgagacc	Primers to amplify the Endogenous target site for deep sequencing of step I
EMX1-deep11-F	ACACTCTTTCCCTACACGACGCTCTTCCGATCTNNNNCACTTCCAGAGGCCAAACTAG	Primers to amplify the Endogenous target site for deep sequencing of step I
EMX1-deep11-R	ACTGGAGTTCAGACGTGTGCTCTTCCGATCTNNNNGTTCTTTCTATATGTGCCTCCCT	Primers to amplify the Endogenous target site for deep sequencing of step I
EMX1-deep14-F	ACACTCTTTCCCTACACGACGCTCTTCCGATCTNNNNCCTGGGTCCAGAGTTGTGTG	Primers to amplify the Endogenous target site for deep sequencing of step I
EMX1-deep14-R	ACTGGAGTTCAGACGTGTGCTCTTCCGATCTNNNNCTTTCTGCAGGACACCCAGG	Primers to amplify the Endogenous target site for deep sequencing of step I
EMX1-deep15-F	ACACTCTTTCCCTACACGACGCTCTTCCGATCTNNNNTTGGGTGGGAGGAAACGAAG	Primers to amplify the Endogenous target site for deep sequencing of step I
EMX1-deep15-R	ACTGGAGTTCAGACGTGTGCTCTTCCGATCTNNNNCACCCTCAGGGGGTCTCTAA	Primers to amplify the Endogenous target site for deep sequencing of step I
EMX1-deep16-F	ACACTCTTTCCCTACACGACGCTCTTCCGATCTNNNNGAGGACGAAAACGGAACTCCT	Primers to amplify the Endogenous target site for deep sequencing of step I
EMX1-deep16-R	ACTGGAGTTCAGACGTGTGCTCTTCCGATCTNNNNTGGGCGATACAGGGAGATCC	Primers to amplify the Endogenous target site for deep sequencing of step I
GRIN2B-deep1-F	ACACTCTTTCCCTACACGACGCTCTTCCGATCTNNNNGGCATTCCAAGGGGACTTGA	Primers to amplify the Endogenous target site for deep sequencing of step I
GRIN2B-deep1-R	ACTGGAGTTCAGACGTGTGCTCTTCCGATCTNNNNTTGCCGTTGGTGAGTTGAGT	Primers to amplify the Endogenous target site for deep sequencing of step I
GRIN2B-deep4-F	ACACTCTTTCCCTACACGACGCTCTTCCGATCTNNNNCCTCAGTGCCATTCTACCCC	Primers to amplify the Endogenous target site for deep sequencing of step I
GRIN2B-deep4-R	ACTGGAGTTCAGACGTGTGCTCTTCCGATCTNNNNTAGCTTTGGCCTCCTTCTGG	Primers to amplify the Endogenous target site for deep sequencing of step I
GRIN2B-deep7-F	ACACTCTTTCCCTACACGACGCTCTTCCGATCTNNNNGATGGAAGGTAACCAGATTGC	Primers to amplify the Endogenous target site for deep sequencing of step I
GRIN2B-deep7-R	ACTGGAGTTCAGACGTGTGCTCTTCCGATCTNNNNAGGAGTTTGAGACCAACCTGG	Primers to amplify the Endogenous target site for deep sequencing of step I
GRIN2B-deep9-F	ACACTCTTTCCCTACACGACGCTCTTCCGATCTNNNNTCCTAGCCTCTCCTGCGTTAAT	Primers to amplify the Endogenous target site for deep sequencing of step I
GRIN2B-deep9-R	ACTGGAGTTCAGACGTGTGCTCTTCCGATCTNNNNACGTAGCACTTGTGGTGAAAC	Primers to amplify the Endogenous target site for deep sequencing of step I
RNF2-deep1-F	ACACTCTTTCCCTACACGACGCTCTTCCGATCTNNNNttggccacataggttccagg	Primers to amplify the Endogenous target site for deep sequencing of step I
RNF2-deep1-R	ACTGGAGTTCAGACGTGTGCTCTTCCGATCTNNNNccacacacccacagaggaaa	Primers to amplify the Endogenous target site for deep sequencing of step I
RNF2-deep2-F	ACACTCTTTCCCTACACGACGCTCTTCCGATCTNNNNtcatgtgtctgtatgcccgc	Primers to amplify the Endogenous target site for deep sequencing of step I
RNF2-deep2-R	ACTGGAGTTCAGACGTGTGCTCTTCCGATCTNNNNtgcatgtgttggtgtgtgttg	Primers to amplify the Endogenous target site for deep sequencing of step I
Rosa26-deep1-F	ACACTCTTTCCCTACACGACGCTCTTCCGATCTNNNNctgggggagtcgttttaccc	Primers to amplify the Endogenous target site for deep sequencing of step I
Rosa26-deep1-R	ACTGGAGTTCAGACGTGTGCTCTTCCGATCTNNNNagccgctcagccctact	Primers to amplify the Endogenous target site for deep sequencing of step I
Rosa26-deep2-F	ACACTCTTTCCCTACACGACGCTCTTCCGATCTNNNNaggggagtgttgcaataccttt	Primers to amplify the Endogenous target site for deep sequencing of step I
Rosa26-deep2-R	ACTGGAGTTCAGACGTGTGCTCTTCCGATCTNNNNgtgggaagtcttgtccctcca	Primers to amplify the Endogenous target site for deep sequencing of step I
Rosa26-deep3-F	ACACTCTTTCCCTACACGACGCTCTTCCGATCTNNNNttgctgggtcacaagtctagg	Primers to amplify the Endogenous target site for deep sequencing of step I
Rosa26-deep3-R	ACTGGAGTTCAGACGTGTGCTCTTCCGATCTNNNNgggtgataaagaacaagggct	Primers to amplify the Endogenous target site for deep sequencing of step I
Th-deep1-F	ACACTCTTTCCCTACACGACGCTCTTCCGATCTNNNNatgcttctgttgggtcctgc	Primers to amplify the Endogenous target site for deep sequencing of step I
Th-deep1-R	ACTGGAGTTCAGACGTGTGCTCTTCCGATCTNNNNatcaggcagaccagccattt	Primers to amplify the Endogenous target site for deep sequencing of step I
Th-deep2-F	ACACTCTTTCCCTACACGACGCTCTTCCGATCTNNNNggcccaggttctaccatacc	Primers to amplify the Endogenous target site for deep sequencing of step I
Th-deep2-R	ACTGGAGTTCAGACGTGTGCTCTTCCGATCTNNNNatgagctgattctccccctg	Primers to amplify the Endogenous target site for deep sequencing of step I
Th-deep3-F	ACACTCTTTCCCTACACGACGCTCTTCCGATCTNNNNtcctccactcctacatggca	Primers to amplify the Endogenous target site for deep sequencing of step I
Th-deep3-R	ACTGGAGTTCAGACGTGTGCTCTTCCGATCTNNNNtccaatgggttcccaggttc	Primers to amplify the Endogenous target site for deep sequencing of step I
Th-deep4-F	ACACTCTTTCCCTACACGACGCTCTTCCGATCTNNNNtcttcctgcttttgctcctga	Primers to amplify the Endogenous target site for deep sequencing of step I
Th-deep4-R	ACTGGAGTTCAGACGTGTGCTCTTCCGATCTNNNNcagcaggatactctgcctcc	Primers to amplify the Endogenous target site for deep sequencing of step I
P5-index1-F	AATGATACGGCGACCACCGAGATCTACAC TGAACCTT ACACTCTTTCCCTACACGAC	Primers to amplify the Endogenous target site for deep sequencing of step II
P5-index2-F	AATGATACGGCGACCACCGAGATCTACAC TGCTAAGT ACACTCTTTCCCTACACGAC	Primers to amplify the Endogenous target site for deep sequencing of step II
P5-index3-F	AATGATACGGCGACCACCGAGATCTACAC TAAGACAC ACACTCTTTCCCTACACGAC	Primers to amplify the Endogenous target site for deep sequencing of step II
P5-index4-F	AATGATACGGCGACCACCGAGATCTACAC TGTTCTCT ACACTCTTTCCCTACACGAC	Primers to amplify the Endogenous target site for deep sequencing of step II
P5-index5-F	AATGATACGGCGACCACCGAGATCTACAC CTAATCGA ACACTCTTTCCCTACACGAC	Primers to amplify the Endogenous target site for deep sequencing of step II
P5-index6-F	AATGATACGGCGACCACCGAGATCTACAC CTAGAACA ACACTCTTTCCCTACACGAC	Primers to amplify the Endogenous target site for deep sequencing of step II
P5-index7-F	AATGATACGGCGACCACCGAGATCTACAC TAAGTTCC ACACTCTTTCCCTACACGAC	Primers to amplify the Endogenous target site for deep sequencing of step II
P5-index8-F	AATGATACGGCGACCACCGAGATCTACAC TAGACCTA ACACTCTTTCCCTACACGAC	Primers to amplify the Endogenous target site for deep sequencing of step II
P5-index37-F	AATGATACGGCGACCACCGAGATCTACAC TATAGCCT ACACTCTTTCCCTACACGAC	Primers to amplify the Endogenous target site for deep sequencing of step II
P5-index38-F	AATGATACGGCGACCACCGAGATCTACAC ATAGAGGC ACACTCTTTCCCTACACGAC	Primers to amplify the Endogenous target site for deep sequencing of step II
P5-index39-F	AATGATACGGCGACCACCGAGATCTACAC CCTATCCT ACACTCTTTCCCTACACGAC	Primers to amplify the Endogenous target site for deep sequencing of step II
P5-index40-F	AATGATACGGCGACCACCGAGATCTACAC GGCTCTGA ACACTCTTTCCCTACACGAC	Primers to amplify the Endogenous target site for deep sequencing of step II
P5-index41-F	AATGATACGGCGACCACCGAGATCTACAC AGGCGAAG ACACTCTTTCCCTACACGAC	Primers to amplify the Endogenous target site for deep sequencing of step II
P5-index42-F	AATGATACGGCGACCACCGAGATCTACAC TAATCTTA ACACTCTTTCCCTACACGAC	Primers to amplify the Endogenous target site for deep sequencing of step II
P5-index43-F	AATGATACGGCGACCACCGAGATCTACAC CAGGACGT ACACTCTTTCCCTACACGAC	Primers to amplify the Endogenous target site for deep sequencing of step II
P5-index44-F	AATGATACGGCGACCACCGAGATCTACAC GTACTGAC ACACTCTTTCCCTACACGAC	Primers to amplify the Endogenous target site for deep sequencing of step II
P7-adapter25-R	CAAGCAGAAGACGGCATACGAGAT CGAGTAAT GTGACTGGAGTTCAGACGTGTG	Primers to amplify the Endogenous target site for deep sequencing of step II
P7-adapter26-R	CAAGCAGAAGACGGCATACGAGAT TCTCCGGA GTGACTGGAGTTCAGACGTGTG	Primers to amplify the Endogenous target site for deep sequencing of step II
P7-adapter27-R	CAAGCAGAAGACGGCATACGAGAT AATGAGCG GTGACTGGAGTTCAGACGTGTG	Primers to amplify the Endogenous target site for deep sequencing of step II
P7-adapter28-R	CAAGCAGAAGACGGCATACGAGAT GGAATCTC GTGACTGGAGTTCAGACGTGTG	Primers to amplify the Endogenous target site for deep sequencing of step II
P7-adapter29-R	CAAGCAGAAGACGGCATACGAGAT TTCTGAAT GTGACTGGAGTTCAGACGTGTG	Primers to amplify the Endogenous target site for deep sequencing of step II
P7-adapter30-R	CAAGCAGAAGACGGCATACGAGAT ACGAATTC GTGACTGGAGTTCAGACGTGTG	Primers to amplify the Endogenous target site for deep sequencing of step II
P7-adapter31-R	CAAGCAGAAGACGGCATACGAGAT AGCTTCAG GTGACTGGAGTTCAGACGTGTG	Primers to amplify the Endogenous target site for deep sequencing of step II
P7-adapter32-R	CAAGCAGAAGACGGCATACGAGAT GCGCATTA GTGACTGGAGTTCAGACGTGTG	Primers to amplify the Endogenous target site for deep sequencing of step II
P7-adapter33-R	CAAGCAGAAGACGGCATACGAGAT CATAGCCG GTGACTGGAGTTCAGACGTGTG	Primers to amplify the Endogenous target site for deep sequencing of step II
P7-adapter34-R	CAAGCAGAAGACGGCATACGAGAT TTCGCGGA GTGACTGGAGTTCAGACGTGTG	Primers to amplify the Endogenous target site for deep sequencing of step II
P7-adapter35-R	CAAGCAGAAGACGGCATACGAGAT GCGCGAGA GTGACTGGAGTTCAGACGTGTG	Primers to amplify the Endogenous target site for deep sequencing of step II
P7-adapter36-R	CAAGCAGAAGACGGCATACGAGAT CTATCGCT GTGACTGGAGTTCAGACGTGTG	Primers to amplify the Endogenous target site for deep sequencing of step II
P5-index3-F	AATGATACGGCGACCACCGAGATCTACAC TAAGACAC ACACTCTTTCCCTACACGAC	Primers to amplify the GUIDE-seq site for deep sequencing of step I
P5-index5-F	AATGATACGGCGACCACCGAGATCTACAC CTAATCGA ACACTCTTTCCCTACACGAC	Primers to amplify the GUIDE-seq site for deep sequencing of step I
P5-index6-F	AATGATACGGCGACCACCGAGATCTACAC CTAGAACA ACACTCTTTCCCTACACGAC	Primers to amplify the GUIDE-seq site for deep sequencing of step I
P5-index39-F	AATGATACGGCGACCACCGAGATCTACAC CCTATCCT ACACTCTTTCCCTACACGAC	Primers to amplify the GUIDE-seq site for deep sequencing of step I
P5-index41-F	AATGATACGGCGACCACCGAGATCTACAC AGGCGAAG ACACTCTTTCCCTACACGAC	Primers to amplify the GUIDE-seq site for deep sequencing of step I
P5-index42-F	AATGATACGGCGACCACCGAGATCTACAC TAATCTTA ACACTCTTTCCCTACACGAC	Primers to amplify the GUIDE-seq site for deep sequencing of step I
Nuclease_off_+_GSP1	GGATCTCGACGCTCTCCCTATACCGTTATTAACATATGACA	Primers to amplify the GUIDE-seq site for deep sequencing of step I
Nuclease_off_-_GSP1	GGATCTCGACGCTCTCCCTGTTTAATTGAGTTGTCATATGTTAATAAC	Primers to amplify the GUIDE-seq site for deep sequencing of step I
P5_2	AATGATACGGCGACCACCGAGATCTACAC	Primers to amplify the GUIDE-seq site for deep sequencing of step II
Nuclease_off_+_GSP2	CAAGCAGAAGACGGCATACGAGATTCGCCTTAGTGACTGGAGTTCAGACGTGTGCTCTTCCGATCTACATATGACAACTCAATTAAAC	Primers to amplify the GUIDE-seq site for deep sequencing of step II
Nuclease_off_-_GSP2	CAAGCAGAAGACGGCATACGAGATCTAGTACGGTGACTGGAGTTCAGACGTGTGCTCTTCCGATCTGAGTTGTCATATGTTAATAACGG	Primers to amplify the GUIDE-seq site for deep sequencing of step II
AAVS2-ON-F	ACCG AGCGCAATGATGATCTCCGAGC	Oligonucleotide pairs for construction of off-target site expression plasmid on U6-Nme2_scaffold vector
nme2-P50-M1-F	ACCG TCCGCAATGATGATCTCCGAGC	Oligonucleotide pairs for construction of off-target site expression plasmid on U6-Nme2_scaffold vector
nme2-P50-M2-F	ACCG AGGCCAATGATGATCTCCGAGC	Oligonucleotide pairs for construction of off-target site expression plasmid on U6-Nme2_scaffold vector
nme2-P50-M3-F	ACCG AGCGGTATGATGATCTCCGAGC	Oligonucleotide pairs for construction of off-target site expression plasmid on U6-Nme2_scaffold vector
nme2-P50-M4-F	ACCG AGCGCATAGATGATCTCCGAGC	Oligonucleotide pairs for construction of off-target site expression plasmid on U6-Nme2_scaffold vector
nme2-P50-M5-F	ACCG AGCGCAATCTTGATCTCCGAGC	Oligonucleotide pairs for construction of off-target site expression plasmid on U6-Nme2_scaffold vector
nme2-P50-M6-F	ACCG AGCGCAATGAACATCTCCGAGC	Oligonucleotide pairs for construction of off-target site expression plasmid on U6-Nme2_scaffold vector
nme2-P50-M7-F	ACCG AGCGCAATGATGTACTCCGAGC	Oligonucleotide pairs for construction of off-target site expression plasmid on U6-Nme2_scaffold vector
nme2-P50-M8-F	ACCG AGCGCAATGATGATGACCGAGC	Oligonucleotide pairs for construction of off-target site expression plasmid on U6-Nme2_scaffold vector
nme2-P50-M9-F	ACCG AGCGCAATGATGATCTGGGAGC	Oligonucleotide pairs for construction of off-target site expression plasmid on U6-Nme2_scaffold vector
nme2-P50-M10-F	ACCG AGCGCAATGATGATCTCCCTGC	Oligonucleotide pairs for construction of off-target site expression plasmid on U6-Nme2_scaffold vector
nme2-P50-M12-F	ACCG AGCGCAATGATGATCTCCGACG	Oligonucleotide pairs for construction of off-target site expression plasmid on U6-Nme2_scaffold vector
AAVS2-ON-R	AAC GCTCGGAGATCATCATTGCGCT C	Oligonucleotide pairs for construction of off-target site expression plasmid on U6-Nme2_scaffold vector
nme2-P50-M1-R	AAC GCTCGGAGATCATCATTGCGGA C	Oligonucleotide pairs for construction of off-target site expression plasmid on U6-Nme2_scaffold vector
nme2-P50-M2-R	AAC GCTCGGAGATCATCATTGGCCT C	Oligonucleotide pairs for construction of off-target site expression plasmid on U6-Nme2_scaffold vector
nme2-P50-M3-R	AAC GCTCGGAGATCATCATACCGCT C	Oligonucleotide pairs for construction of off-target site expression plasmid on U6-Nme2_scaffold vector
nme2-P50-M4-R	AAC GCTCGGAGATCATCTATGCGCT C	Oligonucleotide pairs for construction of off-target site expression plasmid on U6-Nme2_scaffold vector
nme2-P50-M5-R	AAC GCTCGGAGATCAAGATTGCGCT C	Oligonucleotide pairs for construction of off-target site expression plasmid on U6-Nme2_scaffold vector
nme2-P50-M6-R	AAC GCTCGGAGATGTTCATTGCGCT C	Oligonucleotide pairs for construction of off-target site expression plasmid on U6-Nme2_scaffold vector
nme2-P50-M7-R	AAC GCTCGGAGTACATCATTGCGCT C	Oligonucleotide pairs for construction of off-target site expression plasmid on U6-Nme2_scaffold vector
nme2-P50-M8-R	AAC GCTCGGTCATCATCATTGCGCT C	Oligonucleotide pairs for construction of off-target site expression plasmid on U6-Nme2_scaffold vector
nme2-P50-M9-R	AAC GCTCCCAGATCATCATTGCGCT C	Oligonucleotide pairs for construction of off-target site expression plasmid on U6-Nme2_scaffold vector
nme2-P50-M10-R	AAC GCAGGGAGATCATCATTGCGCT C	Oligonucleotide pairs for construction of off-target site expression plasmid on U6-Nme2_scaffold vector
nme2-P50-M12-R	AAC CGTCGGAGATCATCATTGCGCT C	Oligonucleotide pairs for construction of off-target site expression plasmid on U6-Nme2_scaffold vector
AAVS2-Smu-ON-F	ACCG GCGCAATGATGATCTCCGAGCC	Oligonucleotide pairs for construction of off-target site expression plasmid on U6-Nme2_scaffold vector
Nsp2-Smu-M1-F	ACCG CGGCAATGATGATCTCCGAGCC	Oligonucleotide pairs for construction of off-target site expression plasmid on U6-Nme2_scaffold vector
Nsp2-Smu-M2-F	ACCG GCCGAATGATGATCTCCGAGCC	Oligonucleotide pairs for construction of off-target site expression plasmid on U6-Nme2_scaffold vector
Nsp2-Smu-M3-F	ACCG GCGCTTTGATGATCTCCGAGCC	Oligonucleotide pairs for construction of off-target site expression plasmid on U6-Nme2_scaffold vector
Nsp2-Smu-M4-F	ACCG GCGCAAACATGATCTCCGAGCC	Oligonucleotide pairs for construction of off-target site expression plasmid on U6-Nme2_scaffold vector
Nsp2-Smu-M5-F	ACCG GCGCAATGTAGATCTCCGAGCC	Oligonucleotide pairs for construction of off-target site expression plasmid on U6-Nme2_scaffold vector
Nsp2-Smu-M6-F	ACCG GCGCAATGATCTTCTCCGAGCC	Oligonucleotide pairs for construction of off-target site expression plasmid on U6-Nme2_scaffold vector
Nsp2-Smu-M7-F	ACCG GCGCAATGATGAAGTCCGAGCC	Oligonucleotide pairs for construction of off-target site expression plasmid on U6-Nme2_scaffold vector
Nsp2-Smu-M8-F	ACCG GCGCAATGATGATCAGCGAGCC	Oligonucleotide pairs for construction of off-target site expression plasmid on U6-Nme2_scaffold vector
Nsp2-Smu-M9-F	ACCG GCGCAATGATGATCTCGCAGCC	Oligonucleotide pairs for construction of off-target site expression plasmid on U6-Nme2_scaffold vector
Nsp2-Smu-M10-F	ACCG GCGCAATGATGATCTCCGTCCC	Oligonucleotide pairs for construction of off-target site expression plasmid on U6-Nme2_scaffold vector
Nsp2-Smu-M11-F	ACCG GCGCAATGATGATCTCCGAGGG	Oligonucleotide pairs for construction of off-target site expression plasmid on U6-Nme2_scaffold vector
AAVS2-Smu-ON-R	AAC GGCTCGGAGATCATCATTGCGC C	Oligonucleotide pairs for construction of off-target site expression plasmid on U6-Nme2_scaffold vector
Nsp2-Smu-M1-R	AAC GGCTCGGAGATCATCATTGCCG C	Oligonucleotide pairs for construction of off-target site expression plasmid on U6-Nme2_scaffold vector
Nsp2-Smu-M2-R	AAC GGCTCGGAGATCATCATTCGGC C	Oligonucleotide pairs for construction of off-target site expression plasmid on U6-Nme2_scaffold vector
Nsp2-Smu-M3-R	AAC GGCTCGGAGATCATCAAAGCGC C	Oligonucleotide pairs for construction of off-target site expression plasmid on U6-Nme2_scaffold vector
Nsp2-Smu-M4-R	AAC GGCTCGGAGATCATGTTTGCGC C	Oligonucleotide pairs for construction of off-target site expression plasmid on U6-Nme2_scaffold vector
Nsp2-Smu-M5-R	AAC GGCTCGGAGATCTACATTGCGC C	Oligonucleotide pairs for construction of off-target site expression plasmid on U6-Nme2_scaffold vector
Nsp2-Smu-M6-R	AAC GGCTCGGAGAAGATCATTGCGC C	Oligonucleotide pairs for construction of off-target site expression plasmid on U6-Nme2_scaffold vector
Nsp2-Smu-M7-R	AAC GGCTCGGACTTCATCATTGCGC C	Oligonucleotide pairs for construction of off-target site expression plasmid on U6-Nme2_scaffold vector
Nsp2-Smu-M8-R	AAC GGCTCGCTGATCATCATTGCGC C	Oligonucleotide pairs for construction of off-target site expression plasmid on U6-Nme2_scaffold vector
Nsp2-Smu-M9-R	AAC GGCTGCGAGATCATCATTGCGC C	Oligonucleotide pairs for construction of off-target site expression plasmid on U6-Nme2_scaffold vector
Nsp2-Smu-M10-R	AAC GGGACGGAGATCATCATTGCGC C	Oligonucleotide pairs for construction of off-target site expression plasmid on U6-Nme2_scaffold vector
Nsp2-Smu-M11-R	AAC CCCTCGGAGATCATCATTGCGC C	Oligonucleotide pairs for construction of off-target site expression plasmid on U6-Nme2_scaffold vector
