# Supplementary material for: Closely related type II-C Cas9 orthologs recognize diverse PAMs
Source: eLife. 2022 Aug 12;11:e77825. doi: 10.7554/eLife.77825 (PMC9433092; doi:10.7554/eLife.77825)
Supplement: Supplementary file 4. — A list of the endogenous target sites of human and mouse and their downstream PAM. PAM, protospacer adjacent motif. [file elife-77825-supp4.xlsx]

## Sheet: Sheet2
Table S4. Target sites used in this study
Gene	Name	Targets	PAM	Description
AAVS1	A2	tcagcatagggtggcaaagccc	agggcc	Endogenous target site of human
AAVS1	A3	gcagcgcaaagtgacaatggcc	agggcc	Endogenous target site of human
AAVS1	A4	ctctgacctgcattctctcccc	tgggcc	Endogenous target site of human
AAVS1	A7	tctgtcccctccaccccacagt	ggggcc	Endogenous target site of human
AAVS1	A10	gggtctgagggtggagggactg	ggggcc	Endogenous target site of human
AAVS1	A30	agggaggagagatgcccggaga	ggacccag	Endogenous target site of human
AAVS1	A33	tgagaatggtgcgtcctaggtg	ttcaccag	Endogenous target site of human
AAVS1	A41	aggactgcatgggtcagcacag	gctgccaa	Endogenous target site of human
AAVS1	A46	aagcctgagcgcctctcctggg	cttgccaa	Endogenous target site of human
AAVS1	A59	gctgggacttggccagacactg	aggtccag	Endogenous target site of human
VEGFA	V17	ccgggaccctccactcctcctg	ggccccaa	Endogenous target site of human
VEGFA	V18	aggggggtgccgaggaccgaag	ggcaccaa	Endogenous target site of human
VEGFA	V21	tctcgaggtagccccagcccgg	ggatccag	Endogenous target site of human
VEGFA	V36	aggaaacgacctgggaccacct	gttcccaa	Endogenous target site of human
VEGFA	V54	ctgtcccctcctgagcccatgg	gcaaccat	Endogenous target site of human
VEGFA	V60	aagggtgagtctcaggccacag	ggacccaa	Endogenous target site of human
EMX1	E1	aatgtggtgcttgagaagtgga	tggcccaa	Endogenous target site of human
GRIN2B	G1	cccatcaagctgggctccaagg	agggccaa	Endogenous target site of human
GRIN2B	G5	tttacaatgagagacaatactg	gcatccaa	Endogenous target site of human
RNF2	mR4	cacagtgtcagctggatgtggt	ggcacctg	Endogenous target site of mouse
RNF2	mR6	aagaagccaaggatgcaagtcg	tttgccaa	Endogenous target site of mouse
Rosa26	mRo1	atggactcaacttgcacgaaca	cgagccaa	Endogenous target site of mouse
Rosa26	mRo3	gtcttctgggcaggcttaaagg	ctaacctg	Endogenous target site of mouse
Rosa26	mRo5	gaatatcttctggataaacatg	tcctccaa	Endogenous target site of mouse
Th	mTh1	gtggtcttgggagagagcccca	tgatccaa	Endogenous target site of mouse
Th	mTh2	gagtaggacttaggaagccaca	gggaccaa	Endogenous target site of mouse
Th	mTh4	acggcggcagagtctcatcgag	gatgcccg	Endogenous target site of mouse
AAVS1	TS1	cagcatagggtggcaaagccca	gggccagg	Endogenous target site of human
AAVS1	TS2	cagcgcaaagtgacaatggcca	gggccagg	Endogenous target site of human
AAVS1	TS3	tctgacctgcattctctcccct	gggcctgt	Endogenous target site of human
AAVS1	TS4	ctgtcccctccaccccacagtg	gggccact	Endogenous target site of human
AAVS1	TS5	ggtctgagggtggagggactgg	gggcctgg	Endogenous target site of human
AAVS1	TS6	tgaactggagtgtgacagcctg	gggcccag	Endogenous target site of human
EMX1	TS9	taagacgaattgtagaaaggag	agatcac	Endogenous target site of human
EMX1	TS10	actgactggatgtgcacagcag	tgaccg	Endogenous target site of human
EMX1	TS12	ctatgttccaggcactgctcca	agttcat	Endogenous target site of human
EMX1	TS13	ggtggtagagggagcagtatga	gagtctgg	Endogenous target site of human
EMX1	TS14	ccaagacggtgaccagactcaa	gttactga	Endogenous target site of human
GRIN2B	TS16	gtggcaggcgcctgtaatccca	gctactcg	Endogenous target site of human
GRIN2B	TS17	tgcagttagggaataagcccca	gtgtcaag	Endogenous target site of human
Nsp2-VEGFA-sg1-F	V1	ggcagagccaggaatgtgactt	gggtcca	Endogenous target site of human
Nsp2-VEGFA-sg2-F	V2	atgaaggagaggcagaggctga	tgggcct	Endogenous target site of human
Nsp2-EMX1-sg4-F	E4	gcagaggaaacgacaagagaat	aggtcct	Endogenous target site of human
Nsp2-GRIN2-sg2-F	G2	gaggggcagggcagcggcgccc	cgggccg	Endogenous target site of human
Nsp2-GRIN2-sg4-F	G4	ttgctgtctaaagggttgacaa	ggggccc	Endogenous target site of human
Nsp2-GRIN2-sg7-F	G7	gaggagggcattgatggggcac	tggccct	Endogenous target site of human
Nme2-AAVS1-sg19	A19	atcgccaggtgaggcaaggg	agggcc	Endogenous target site of human
Sp-AAVS1-sg2-F	A2	agcatagggtggcaaagccc	agggcc	Endogenous target site of human
Sp-EMX1-sg1-F	E1	tgtggtgcttgagaagtgga	tggcccaa	Endogenous target site of human
Sp-AAVS1-sg7-F	A7	tgtcccctccaccccacagt	ggggcc	Endogenous target site of human
Sp-AAVS1-sg10-F	A10	gtctgagggtggagggactg	ggggcc	Endogenous target site of human
Sp-AAVS1-sg19-F	A19	Gatcgccaggtgaggcaaggg	agggcc	Endogenous target site of human
Sp-VEGFA-sg1-F	V1	cagagccaggaatgtgactt	gggtcca	Endogenous target site of human
Sp-VEGFA-sg2-F	V2	gaaggagaggcagaggctga	tgggcct	Endogenous target site of human
Sp-EMX1-sg4-F	E4	agaggaaacgacaagagaat	aggtcct	Endogenous target site of human
Sp-GRIN2-sg2-F	G2	ggggcagggcagcggcgccc	cgggccg	Endogenous target site of human
Sp-GRIN2-sg4-F	G4	gctgtctaaagggttgacaa	ggggccc	Endogenous target site of human
Sp-GRIN2-sg7-F	G7	ggagggcattgatggggcac	tggccct	Endogenous target site of human
GRIN2B	sg1	cccatcaagctgggctccaagg	agggccaa	Endogenous target site of human for GUIDE-seq
VEGFA	sg17	ccgggaccctccactcctcctg	ggccccaa	Endogenous target site of human for GUIDE-seq
AAVS1	sg46	aagcctgagcgcctctcctggg	cttgccaa	Endogenous target site of human for GUIDE-seq
EMX1	sg12	ggtggtagagggagcagtatga	gagtct	Endogenous target site of human for GUIDE-seq
AAVS1	sg2	cagcatagggtggcaaagccca	gggccagg	Endogenous target site of human for GUIDE-seq
GRIN2B	sg10	tgcagttagggaataagcccca	gtgtcaag	Endogenous target site of human for GUIDE-seq
