# Supplementary material for: Closely related type II-C Cas9 orthologs recognize diverse PAMs
Source: eLife. 2022 Aug 12;11:e77825. doi: 10.7554/eLife.77825 (PMC9433092; doi:10.7554/eLife.77825)
Supplement: Supplementary file 5. — Raw data from all reported summary statistics. [file elife-77825-supp5.xlsx]

## Sheet: Fig 3C-D
	Fig 3C. Comparison of Nme2Cas9 and Nsp2Cas9 efficiency for genome editing at 19 endogenous loci.
	Fig 3D. Quantification of editing efficiency for Nme2Cas9 and Nsp2Cas9
		Nme2Cas9					Nsp2Cas9
		Repeat 1	Repeat 2	Repeat 3	Average	Stdev	Repeat 1	Repeat 2	Repeat 3	Average	Stdev
	A2	12.14	13.82	0.86	12.98	7.04772	19.46	14.05	2.25	11.92	8.80049
	A3	6.5	8.56	1.16	7.53	3.81923	9.11	7.81	2.05	6.32333	3.75746
	A4	5.3	10.26	1.8	7.78	4.25094	12.53	6.61	6.32	8.48667	3.50463
	A7	12.15	20.83	1.02	16.49	9.93022	17.88	17.38	6.49	13.9167	6.43654
	A10	25.4	28.24	18.81	26.82	4.83768	28.51	30.05	31.29	29.95	1.3927
	A30	9.18	15.05	11.92	12.115	2.93716	12.87	10.07	16.8	13.2467	3.38077
	A33	12.28	11.69	14.43	11.985	1.44212	27.73	12.44	17.11	19.0933	7.83557
	A41	15.17	19.56	0.95	17.365	9.72807	25.26	10.77	1.04	12.3567	12.1877
	A46	17.54	13.55	50.46	15.545	20.2567	14.93	12	45.76	24.23	18.703
	A59	16.67	8.94	23.91	12.805	7.48634	23.38	16.69	14.89	18.32	4.47356
	V17	9.6	10.52	12.55	10.06	1.5094	21.6	11.32	11.59	14.8367	5.85877
	V18	15.43	12.66	11.15	14.045	2.17069	16.72	9.04	17.19	14.3167	4.57577
	V21	15.06	16.71	16.36	15.885	0.869387	19.07	10.67	19	16.2467	4.82966
	V36	25.68	7.48	16.34	16.58	9.10105	10.67	14.64	19.79	15.0333	4.57271
	V54	24.57	44.17	28.07	34.37	10.4532	37.04	59.57	29.67	42.0933	15.5774
	V60	25.53	16.21	17.56	20.87	5.03663	11.03	12.1	14.3	12.4767	1.66722
	E1	15.79	9.07	12	12.43	3.36916	7.22	9.84	7.8	8.28667	1.37613
	G1	20.79	37.81	9.84	29.3	14.0943	19.46	8.73	18.56	15.5833	5.9522
	G5	20.84	32.22	30.61	26.53	6.15832	18.37	14.1	41.86	24.7767	14.9479

## Sheet: Fig 4D
	Fig 4D.Genome editing with Nsp2-SmuCas9 and NarCas9 for a panel of 12 loci with the N4C PAM.
	Fig 4E.Quantification of editing efficiency for Nsp2-SmuCas9 and NarCas9.
		Nsp2-SmuCas9					NarCas9
		Repeat 1	Repeat 2	Repeat 3	Average	Stdev	Repeat 1	Repeat 2	Repeat 3	Average	Stdev
	TS1	16.48	18.86	16.7	17.3467	1.31519	11.04	8.32	10.93	10.0967	1.53962
	TS2	12.93	12.44	11.85	12.4067	0.540771	1.7	1.96	1.79	1.81667	0.132035
	TS3	17.86	17.94	15.63	17.1433	1.3112	9.89	7.89	10.94	9.57333	1.54946
	TS4	5.68	7.14	6.53	6.45	0.73328	5.42	5.75	7.54	6.23667	1.14072
	TS5	17.78	19.91	17.83	18.5067	1.21558	13.9	13.17	13.22	13.43	0.407799
	TS6	6.51	6.16	5.71	6.12667	0.40104	1.21	1.25	1.33	1.26333	0.061101
	TS9	13.67	16.41	16.01	15.3633	1.48005	3.44	4.39	3.38	3.73667	0.566598
	TS10	5.56	5.48	4.44	5.16	0.62482	0.28	0.27	0.28	0.276667	0.0057735
	TS12	1.39	1.22	0.83	1.14667	0.287112	0.32	0.28	0.38	0.326667	0.0503322
	TS13	35.6	35.28	36.24	35.7067	0.488808	14.95	18.38	19.99	17.7733	2.57419
	TS14	17.97	16.47	13.68	16.04	2.17709	2.35	1.92	2.13	2.13333	0.215019
	TS17	21.98	27.67	23.16	24.27	3.00302	7.55	7.65	9.05	8.08333	0.83865

## Sheet: Fig 5B-C
	Figure 5B. Nsp2Cas9、Nsp2-SmuCas9, and SpyCas9 variants efficiencies vary based on the locus and target site.
	Figure 5C. Quantification of the indel efficiencies for Nsp2Cas9、Nsp2-SmuCas9 and SpyCas9 variants.
		Nsp2Cas9					Nsp2-SmuCas9					SpCas9-WT					SpCas9-NG					SpCas9-RY
		Repeat 1	Repeat 2	Repeat 3	Average	Stdev	Repeat 1	Repeat 2	Repeat 3	Average	Stdev	Repeat 1	Repeat 2	Repeat 3	Average	Stdev	Repeat 1	Repeat 2	Repeat 3	Average	Stdev	Repeat 1	Repeat 2	Repeat 3	Average	Stdev
	A2	8.9	7.03	6.73	7.965	1.17585	1.29	1.11	1.03	1.14333	0.133167	7.48	8.01	7.31	7.6	0.365103	7.78	6.88	5.73	6.79667	1.02754	7.16	5.72	6.87	6.58333	0.761599
	E1	0.84	0.91	0.8	0.875	0.0556776	3.26	2.72	2.48	2.82	0.3995	12.33	13.48	12.16	12.6567	0.718076	6.69	8.68	7.61	7.66	0.995942	5.5	5.98	6.57	6.01667	0.535942
	A7	3.78	6.86	6.89	5.32	1.78696	1.85	1.51	1.63	1.66333	0.172434	0.4	0.48	0.38	0.42	0.052915	0.38	0.48	0.41	0.423333	0.051316	0.4	0.54	0.44	0.46	0.072111
	A10	13.7	15.26	14.78	14.48	0.798999	13.05	13.35	12.75	13.05	0.3	13.83	14.11	13.34	13.76	0.389744	13.27	14	13.55	13.6067	0.368284	14.3	13.83	13.51	13.88	0.397366
	A19	4.39	5.29	4.28	4.84	0.554106	3.96	5.1	4.23	4.43	0.595735	10.83	13.7	11.64	12.0567	1.47967	7.95	8.22	6.95	7.70667	0.669054	7.08	7.19	7.81	7.36	0.393573
	V1	7.24	6.79	6.5	7.015	0.372872	3.03	1.82	1.95	2.26667	0.664254	2.03	2.09	2.12	2.08	0.0458258	0.87	1.08	0.83	0.926667	0.134288	0.89	0.97	0.7	0.853333	0.138684
	V2	3.15	3.06	2.96	3.105	0.0950438	0.84	0.76	0.65	0.75	0.0953939	4.21	3.99	3.8	4	0.205183	2.89	3.16	3.08	3.04333	0.138684	1.58	1.42	1.37	1.45667	0.109697
	E4	6.42	5.01	5.65	5.715	0.705998	0.72	0.91	0.78	0.803333	0.0971253	8.74	8.97	8.99	8.9	0.138924	3.22	4.07	3.45	3.58	0.439659	4.39	4.78	2.92	4.03	0.980867
	G2	0.43	0.44	0.4	0.435	0.0208167	0.68	0.67	0.74	0.696667	0.0378594	8.37	8.63	7.59	8.19667	0.541233	0.86	1	1.02	0.96	0.087178	0.56	0.61	0.53	0.566667	0.0404145
	G4	11.26	10.09	8.68	10.675	1.29186	1.3	1.71	1.33	1.44667	0.228546	23.87	24.4	21.62	23.2967	1.47602	10.3	10.05	9.21	9.85333	0.570993	9.56	9.06	8.33	8.98333	0.618574
	G5	4.66	4.29	3.47	4.475	0.609016	1.27	1.26	0.29	0.94	0.562939	14.21	12.57	12.63	13.1367	0.930018	4.47	5.65	4.72	4.94667	0.621798	5.13	3.81	3.24	4.06	0.969484

## Sheet: Fig 6A
	Fig 6A. Schematic of the GFP-reporter assay for specificity analysis is shown on the top. A panel of gRNAs with dinucleotide mutations is shown below. Each gRNA activity for Nsp2Cas9 and Nme2Cas9 is analyzed based on GFP expression.
			Nsp2Cas9						Nme2Cas9
		Repeat 1	Repeat 2	Repeat 3	Average	Stdev			Repeat 1	Repeat 2	Repeat 3	Average	Stdev
	ON	20.6	16.4	28.6	21.8667	6.19785		ON	12.4	19.1	18.4	16.6333	3.68284
	M1	11.8	12.6	20.5	14.9667	4.80867		M1	0.68	0.49	0.79	0.653333	0.151767
	M2	0.18	0.37	0.39	0.313333	0.115902		M2	0.031	0.047	0.024	0.034	0.0117898
	M3	0.21	0.31	0.19	0.236667	0.064291		M3	0.14	0.062	0.096	0.0993333	0.0391067
	M4	5.72	6.43	4.39	5.51333	1.03558		M4	0.083	0.024	0.076	0.061	0.0322335
	M5	0.12	0.075	0.058	0.0843333	0.0320364		M5	0.074	0.025	0.027	0.042	0.0277308
	M6	0.57	0.3	0.24	0.37	0.175784		M6	0.052	0.048	0.038	0.046	0.0072111
	M7	0.11	0.14	0.011	0.087	0.0675056		M7	0.042	0.012	0.039	0.031	0.0165227
	M8	2.14	1.85	1.29	1.76	0.432088		M8	0.042	0.012	0.024	0.026	0.0150997
	M9	2.62	2.27	2.18	2.35667	0.232451		M9	0.06	0.026	0.053	0.0463333	0.0179536
	M10	2.14	1.46	1.71	1.77	0.343948		M10	0.072	0.12	0.048	0.08	0.0366606
	M12	0.01	0.043	0.012	0.0216667	0.0185023		M12	0.041	0.012	0.022	0.025	0.0147309
	NC	0.063	0.03	0.045	0.046	0.0165227		NC	0.032	0.076	0.077	0.0616667	0.025697

## Sheet: Fig 7A
	Fig 7A. Schematic of the GFP-reporter assay for specificity analysis is shown on the top. A panel of gRNAs with dinucleotide mutations is shown below. Each gRNA activity for Nsp2-SmuCas9 is analyzed based on GFP expression.
			Nsp2-SmuCas9
		Repeat 1	Repeat 2	Repeat 3	Average	Stdev
	ON	15.4	13.1	12.7	13.7333	1.45717
	M1	0.48	0.63	0.62	0.576667	0.083865
	M2	0.13	0.1	0.065	0.0983333	0.032532
	M3	0.47	0.72	0.58	0.59	0.1253
	M4	0.076	0.18	0.075	0.110333	0.0603352
	M5	0.11	0.11	0.11	0.11	0
	M6	0.21	0.11	0.12	0.146667	0.0550757
	M7	0.17	0.1	0.2	0.156667	0.051316
	M8	0.15	0.055	0.13	0.111667	0.0500833
	M9	0.19	0.2	0.12	0.17	0.043589
	M10	0.21	0.21	0.1	0.173333	0.0635085
	M12	0.21	0.24	0.15	0.2	0.0458258
	NC	0.034	0.2	0.087	0.107	0.084788

## Sheet: Fig 3-figure supplement 1
	Fig 3-figure supplement 1. The effect of spacer length on the efficiency of Nsp2Cas9 editing.
		Nsp2Cas9
		Repeat 1	Repeat 2	Repeat 3	Average	Stdev
	G18	0.25	0.25	0.26	0.25	0.0057735
	G19	0.32	0.32	0.4	0.32	0.046188
	G20	0.4	0.49	0.42	0.445	0.0472582
	G21	3.15	3.55	3.19	3.35	0.220303
	G22	8.17	8.16	7.51	8.165	0.378197
	G23	7.88	7.76	7.38	7.82	0.261024
	G24	7.84	7.91	6.71	7.875	0.673523
	G25	7.36	6.89	6.17	7.125	0.599361
	G26	6.98	7.3	7.41	7.14	0.223383

## Sheet: Fig 3-figure supplement 2A-2E
	Fig 3-figure supplement 2. Nsp2Cas9 enables genome editing in diverse cell types, including (A) HeLa, (B) HCT116 , (C) A375, (D) SH-SY5Y and (E) N2a cells.
		HeLa							HCT116
		Repeat 1	Repeat 2	Repeat 3	Average	Stdev			Repeat 1	Repeat 2	Repeat 3	Average	Stdev
	A2	6.7	10.6	7.3	8.2	2.1		A2	0.9	0.92	0.99	0.936667	0.0472582
	A3	2.5	2.5	3	2.66667	0.288675		A3	1.3	1.21	1.31	1.27333	0.0550757
	A4	3.9	5.1	4.1	4.36667	0.64291		A4	1.3	1.32	1.55	1.39	0.138924
	A7	13	11.1	13.7	12.6	1.34536		A7	0.8	0.74	0.7	0.746667	0.0503322
	A15	4.4	4.7	4.6	4.56667	0.152753		A15	0.7	0.51	0.47	0.56	0.122882
	A19	3.7	3.1	2.8	3.2	0.458258		A19	2.9	2.99	3.58	3.15667	0.369369
	A27	1.5	0.3	0.2	0.666667	0.723418		A27	0.6	0.54	0.42	0.52	0.0916515
	A30	11.7	18.7	13.4	14.6	3.65103		A30	0.2	0.24	0.31	0.25	0.0556776															G5
	A41	0.9	1.2	1.5	1.2	0.3		A41	0.3	0.3	0.31	0.303333	0.0057735
	A46	32.1	38.7	40.2	37	4.30929		A59	19.7	20.12	4.89	14.9033	8.67434
	A59	11.9	15.4	13.1	13.4667	1.77858		V60	0.3	0.48	0.42	0.4	0.0916515
	V60	7.3	8.3	6.3	7.3	1		G1	0.3	0.33	0.43	0.353333	0.0680686
	G1	8.9	10.3	9.1	9.43333	0.757188		G5	22.4	14.74	20.84	19.3267	4.04803
	G5	28.9	25.3	23.1	25.7667	2.92803
		A375							SHSY5Y
		Repeat 1	Repeat 2	Repeat 3	Average	Stdev			Repeat 1	Repeat 2	Repeat 3	Average	Stdev
	A2	1	0.86	1.09	0.983333	0.115902		A2	2.4	2.9	2.7	2.66667	0.251661
	A3	1.29	0.85	1.33	1.15667	0.266333		A3	1.8	1.4	1.5	1.56667	0.208167
	A4	2.81	2.87	2.12	2.6	0.416773		A4	2.2	2.3	2.4	2.3	0.1
	A7	2.53	6.67	2.83	4.01	2.30851		A7	8.7	9.3	12.5	10.1667	2.04287
	A15	1.45	1.13	1.9	1.49333	0.386825		A15	2.8	3.3	3	3.03333	0.251661
	A19	2.9	2.46	3.02	2.79333	0.294845		A19	3	2.9	3	2.96667	0.057735
	A27	1.35	1.89	0.87	1.37	0.510294		A27	1	2.1	0.4	1.16667	0.862168
	A30	0.21	0.37	0.35	0.31	0.087178		A30	5.3	4.7	5.7	5.23333	0.503322
	A41	0.26	0.33	0.47	0.353333	0.106927		A41	1.4	1.6	1.7	1.56667	0.152753
	A46	50.84	51.06	52.66	51.52	0.993378		A46	30.6	25.8	29.5	28.6333	2.51462
	A59	21.33	14.98	19.75	18.6867	3.30585		A59	14.6	10.1	8.3	11	3.245
	V60	1.24	1.63	1.71	1.52667	0.251462		V60	3.2	2.9	2.6	2.9	0.3
	G1	0.35	0.23	0.23	0.27	0.069282		G1	6.6	6	6	6.2	0.34641
	G5	41.45	46.73	38.82	42.3333	4.0283		G5	30.8	25.2	26.8	27.6	2.88444
		N2a
		Repeat 1	Repeat 2	Repeat 3	Average	Stdev
	mR4	11.12	12.86	4.59	9.52333	4.36007
	mR6	39.31	41.6	15.97	32.2933	14.1827
	Rosa26-1	51.16	48.5	24.13	41.2633	14.8974
	Rosa26-3	25.56	27.26	10.95	21.2567	8.96622
	Rosa26-5	11.23	14.49	4.5	10.0733	5.09445
	Th1	42.14	44.19	15.3	33.8767	16.1205
	Th2	24.2	22.3	6.38	17.6267	9.78612
	Th4	9.09	7.44	1.24	5.92333	4.13894

## Sheet: Fig 3-figure supplement 3B
	Fig 3-figure supplement 3B. Schematic of the GFP-reporter assay for cleavage analysis is shown on the top.
		Repeat 1	Repeat 2	Repeat 3	Average	Stdev
	Nsp2Cas9	21.5	18.8	21.2	20.5	1.47986
	S597R	13.5	13.2	12.6	13.1	0.458258
	W600R	26.5	18.4	12.9	19.2667	6.8413
	S597R & W600R	23.7	18.7	20.4	20.9333	2.54231

## Sheet: Fig 3-figure supplement 4B-4C
	Figure 3-figure supplement 4B. Genome editing with NarCas9 for 10 endogenous loci in HEK293T cells.
		NarCas9
		Repeat 1	Repeat 2	Repeat 3	Average	Stdev
	TS1	11.04	8.32	10.93	10.0967	1.53962
	TS2	1.7	1.96	1.79	1.81667	0.132035
	TS3	9.89	7.89	10.94	9.57333	1.54946
	TS4	5.42	5.75	7.54	6.23667	1.14072
	TS5	13.9	13.17	13.22	13.43	0.407799
	TS6	1.21	1.25	1.33	1.26333	0.061101
	TS9	3.44	4.39	3.38	3.73667	0.566598
	TS10	0.28	0.27	0.28	0.276667	0.0057735
	TS12	0.32	0.28	0.38	0.326667	0.0503322
	TS13	14.95	18.38	19.99	17.7733	2.57419
	TS14	2.35	1.92	2.13	2.13333	0.215019
	TS17	7.55	7.65	9.05	8.08333	0.83865
	Figure 3-figure supplement 4C. Genome editing with NarCas9 for 9 endogenous loci in HeLa cells.
		NarCas9
		Repeat 1	Repeat 2	Repeat 3	Average	Stdev
	TS1	6.49	9.47	7.25	7.98	2.10718
	TS2	1.25	1	0.82	1.125	0.176777
	TS3	7.43	8.13	7.34	7.78	0.494975
	TS4	6.36	6.29	4.76	6.325	0.0494975
	TS5	12.13	12.07	12.27	12.1	0.0424264
	TS9	3.29	2.44	2.73	2.865	0.601041
	TS13	13.57	13.31	12.29	13.44	0.183848
	TS16	7.63	10.69	6.93	9.16	2.16375
	TS17	4.17	3.74	3.7	3.955	0.304056

## Sheet: Figure 4-figure supplement 1D
	Figure 4-figure supplement 1D.Genome editing with Nme2-SmuCas9 for a panel of 12 loci with the N4C PAM.
		Nme2-SmuCas9
		Repeat 1	Repeat 2	Repeat 3	Average	Stdev
	TS1	1.06	1	0.93	0.996667	0.0650641
	TS2	0.25	0.23	0.18	0.22	0.0360555
	TS3	0.6	0.74	0.43	0.59	0.155242
	TS4	0.6	0.6	0.46	0.553333	0.080829
	TS5	14.5	13.45	26.04	17.9967	6.98549
	TS6	0.17	0.14	0.13	0.146667	0.0208167
	TS9	0.92	0.72	0.87	0.836667	0.104083
	TS10	0.46	0.4	0.36	0.406667	0.0503322
	TS12	0.32	0.29	0.2	0.27	0.06245
	TS13	13.93	12.2	11.87	12.6667	1.10645
	TS14	0.65	0.69	0.46	0.6	0.122882
	TS17	0.4	0.36	0.5	0.42	0.072111
